# Supplementary material for: Bacterial infection remodels the DNA methylation landscape of human dendritic cells
Source: HighWire-hosted journal article supplement (doi:10.1101/gr.192005.115), 2015-09-21
Supplement: TableS1_NGS_Stats.xlsx [file TableS1_NGS_Stats.xlsx]

## Sheet: MethylC-seq
Supplementary Table 1-1: MethylC-seq statistics.
Sample name	Total reads	Mapped reads1	Mapping %	Mean coverage2	# CpGs with ≥1 coverage	# CpGs with ≥4 coverage	Bisulfite conversion rate
NI 81	673575027	497367621	0.7384	9.53428	24617968	21937572	>99%
NI 82	778512773	599068117	0.769503	9.14815	23551701	20169172	>99%
NI 83	599239195	436418177	0.728287	8.35962	24445760	21255015	>99%
NI 87	612192898	448601210	0.732778	8.36558	24479420	21314022	>99%
NI 89	737356695	524231177	0.71096	8.5365	24560919	21419217	>99%
NI 91	589033948	443966353	0.753719	8.93754	21745340	21745340	>99%
MTB 81	615577166	469955318	0.763439	8.83808	24539749	21573298	>99%
MTB 82	776768469	597556104	0.769285	9.21975	23599734	20400021	>99%
MTB 83	627461463	474355695	0.755992	9.02172	24560174	21699511	>99%
MTB 87	800484416	618731470	0.772946	11.0391	24804920	22304219	>99%
MTB 89	533892830	330564119	0.619158	5.81074	23664379	17952465	>99%
MTB 91	431782585	331275095	0.767227	6.24836	24110034	19065900	>99%
1 After quality-trimming, PCR deduplication, and filtering for uniquely mapped reads
2 On called CpGs

## Sheet: mRNA-seq
Supplementary Table 1-2: mRNA-seq statistics.
Sample name	Total reads	Mapped reads1	Mapping %
NI 81	87434240	77756553	0.889315
NI 82	98067055	87453479	0.891772
NI 83	83070615	75164137	0.904822
NI 87	89540753	81468236	0.909845
NI 89	102463999	92560405	0.903346
NI 91	85593295	74070961	0.865383
MTB 81	85646987	76669192	0.895177
MTB 82	68918397	62418497	0.905687
MTB 83	83682193	76457631	0.913667
MTB 87	105226892	95430891	0.906906
MTB 89	118294198	107806797	0.911345
MTB 91	118932650	107690627	0.905476
1 After quality-trimming and filtering for uniquely mapped reads

## Sheet: wtRNA-seq
Supplementary Table 1-3: wtRNA-seq statistics.
Sample name	Total reads	Mapped reads1	Mapping %
NI 174	65578308	23903285	0.3645
NI 178	72866546	36123016	0.495742
NI 180	79802876	35217961	0.441312
MTB 174	80163656	33946374	0.423463
MTB 178	79601038	28640672	0.359803
MTB 180	64845422	26613166	0.410409
1 After quality-trimming, PCR deduplication, and filtering for uniquely mapped reads

## Sheet: ChIP-seq
Supplementary Table 1-4: ChIP-seq statistics.
Sample name	Total reads	Mapped reads1	Mapping %
NI 174 Input	14867695	10895587	0.732836
NI 174 H3K27ac	35698328	28603011	0.801242
NI 174 H3K27me3	39104253	27222564	0.696154
NI 174 H3K36me3	27472857	20686932	0.752995
NI 174 H3K4me1	26142266	20695007	0.79163
NI 174 H3K4me3	30724309	24620064	0.801322
NI 174 H3K9me3	28711468	16321139	0.568454
MTB 174 Input	29219809	19662598	0.67292
MTB 174 H3K27ac	31229212	24953017	0.799028
MTB 174 H3K27me3	31545018	22653985	0.718148
MTB 174 H3K36me3	28606986	21418501	0.748716
MTB 174 H3K4me1	11845388	9244491	0.78043
MTB 174 H3K4me3	21405942	16594334	0.775221
MTB 174 H3K9me3	32430322	16775347	0.517274
NI 178 Input	29345226	21635356	0.73727
NI 178 H3K27ac	26143976	20805477	0.795804
NI 178 H3K27me3	32122381	23661402	0.736602
NI 178 H3K36me3	34946866	26553175	0.759816
NI 178 H3K4me1	26542152	20718502	0.780589
NI 178 H3K4me3	18603442	14053404	0.75542
NI 178 H3K9me3	34730323	21441896	0.617383
MTB 178 Input	30975052	21368803	0.689871
MTB 178 H3K27ac	35445002	28969282	0.817302
MTB 178 H3K27me3	31191072	23082461	0.740034
MTB 178 H3K36me3	28962776	22069596	0.761999
MTB 178 H3K4me1	24108301	18716475	0.77635
MTB 178 H3K4me3	27597838	22218129	0.805068
MTB 178 H3K9me3	34462019	30960159	0.898385
1 After quality-trimming, PCR deduplication, and filtering for uniquely mapped reads

## Sheet: TAB-seq
Supplementary Table 1-5: TAB-seq statistics.
Sample name	Total reads	Mapped reads1	Mapping %	Mean coverage2	# CpGs with ≥1 coverage	# CpGs with ≥4 coverage	Non-conversion rate	Protection rate
NI 82	205764223	180031773	0.874942	10.134	27818622	26093841	0.056994	0.808511
MTB 82	225166504	196199540	0.871353	9.33319	27770156	25579725	0.038271	0.827431
1 After quality-trimming, PCR deduplication, and filtering for uniquely mapped reads
2 On called CpGs

## Sheet: ATAC-seq
Supplementary Table 1-6: ATAC-seq statistics.
Sample name	Total reads	Mapped reads1	Mapping %
NI 234	464489352	430479116	0.926779
MTB 234	345873000	244671762	0.707403
1 After filtering for uniquely mapped reads (MAPQ of ≥10)
