# Supplementary material for: Bacterial infection remodels the DNA methylation landscape of human dendritic cells
Source: HighWire-hosted journal article supplement (doi:10.1101/gr.192005.115), 2015-09-21
Supplement: TableS2_MTB_DMR.xlsx [file TableS2_MTB_DMR.xlsx]

## Sheet: Sheet1
Supplementary Table 2: List of MTB-DMRs1.
Chr	Start	End	# CpGs	Length (bp)	Direction	Ensembl gene ID	Hugo gene ID	Distance from TSS	ChromHMM state (NI)	ChromHMM state (MTB)	log2FCa	FDRb
chr1	928005	928105	3	101	hypo	ENSG00000188290	HES4	7496	7	7	5.36152	2.01218e-21
chr1	1404170	1404242	9	73	hypo	ENSG00000215915	ATAD3C	19137	7	7	-1.26001	9.08643e-06
chr1	1445029	1445042	3	14	hyper	ENSG00000197785	ATAD3A	2494	7	7	-0.777579	0.00623137
chr1	2077884	2077967	3	84	hyper	ENSG00000067606	PRKCZ	96016	5	7	-1.20649	1.63129e-08
chr1	2722280	2722321	3	42	hypo	ENSG00000215912	TTC34	4013	7	7	-0.115442	0.751406
chr1	2780762	2780836	4	75	hyper	ENSG00000215912	TTC34	62512	7	7	-0.115442	0.751406
chr1	4064765	4064914	4	150	hypo	ENSG00000198912	C1orf174	247989	7	7	0.0331227	0.897016
chr1	4087977	4088020	3	44	hyper	ENSG00000198912	C1orf174	271148	7	7	0.0331227	0.897016
chr1	6051294	6051307	3	14	hypo	ENSG00000131697	NPHP4	128427	3	3	-0.6964	6.35896e-05
chr1	6341390	6341551	5	162	hyper	ENSG00000097021	ACOT7	17137	4	4	-2.27833	5.54164e-13
chr1	6607441	6607648	3	208	hypo	ENSG00000162408	NOL9	26137	6	6	-0.0282444	0.90598
chr1	6749013	6749042	3	30	hypo	ENSG00000007923	DNAJC11	54799	7	7	0.0734561	0.766568
chr1	6843760	6843874	5	115	hypo	ENSG00000171735	CAMTA1	1565	3	1	0.231387	0.232535
chr1	7946073	7946097	4	25	hypo	ENSG00000049247	UTS2	32512	7	7	0.288674	0.875298
chr1	8266570	8266714	6	145	hypo	ENSG00000162426	SLC45A1	111242	4	4	-3.04473	1.74901e-07
chr1	8277814	8277821	3	8	hyper	ENSG00000162426	SLC45A1	100067	4	5	-3.04473	1.74901e-07
chr1	8463246	8463252	3	7	hyper	ENSG00000142599	RERE	48563	7	7	-1.77135	5.15505e-22
chr1	9070577	9070766	5	190	hypo	ENSG00000197241	SLC2A7	7312	5	5	1.9148	NA
chr1	9362896	9362964	4	69	hyper	ENSG00000171621	SPSB1	9991	5	6	1.31057	0.0026325
chr1	9847739	9847895	3	157	hypo	ENSG00000171603	CLSTN1	58733	7	4	-0.0536823	0.830594
chr1	10555537	10555549	3	13	hypo	ENSG00000142655	PEX14	20599	1	1	0.920065	5.56481e-05
chr1	11046066	11046214	6	149	hyper	ENSG00000175262	C1orf127	4045	5	5	-2.09224	2.59978e-10
chr1	11766993	11767008	3	16	hypo	ENSG00000162490	DRAXIN	15214	7	7	0.319279	0.328559
chr1	11889529	11889823	6	295	hypo	ENSG00000011021	CLCN6	23469	6	5	1.31257	1.49367e-09
chr1	11986839	11986848	5	10	hyper	ENSG00000116685	KIAA2013	357	1	1	-1.09945	3.12853e-07
chr1	12133689	12133807	5	119	hyper	ENSG00000120949	TNFRSF8	10314	7	7	1.83567	3.79822e-05
chr1	12219967	12219981	3	15	hypo	ENSG00000028137	TNFRSF1B	7084	7	5	2.06453	8.42609e-27
chr1	12475037	12475428	6	392	hypo	ENSG00000048707	VPS13D	185108	5	4	0.0688556	0.831028
chr1	12509445	12509707	4	263	hypo	ENSG00000048707	VPS13D	219452	7	5	0.0688556	0.831028
chr1	12553341	12553363	3	23	hypo	ENSG00000048707	VPS13D	263228	6	6	0.0688556	0.831028
chr1	12616399	12616675	5	277	hyper	ENSG00000162496	DHRS3	61199	7	7	1.11776	0.0683796
chr1	12667157	12667472	4	316	hyper	ENSG00000162496	DHRS3	39375	7	7	1.11776	0.0683796
chr1	14000693	14001036	4	344	hyper	ENSG00000116731	PRDM2	25827	5	7	0.235899	0.352865
chr1	14137807	14137878	3	72	hyper	ENSG00000116731	PRDM2	111149	6	6	0.235899	0.352865
chr1	15614049	15614193	3	145	hypo	ENSG00000142621	FHAD1	40353	7	7	-0.80854	0.00611196
chr1	15786485	15786779	5	295	hypo	ENSG00000142615	CELA2A	3408	7	3	0.846108	0.215772
chr1	15905667	15905977	3	311	hypo	ENSG00000116771	AGMAT	6974	4	4	0.112341	0.788811
chr1	16193899	16194000	3	102	hypo	ENSG00000065526	SPEN	19590	5	5	0.970394	0.000170448
chr1	16275011	16275074	5	64	hypo	ENSG00000116809	ZBTB17	6676	5	3	1.36754	2.10995e-09
chr1	16290483	16290576	4	94	hypo	ENSG00000116809	ZBTB17	22163	3	3	1.36754	2.10995e-09
chr1	16301478	16301594	4	117	hypo	ENSG00000116809	ZBTB17	33170	3	1	1.36754	2.10995e-09
chr1	16391189	16391224	4	36	hyper	ENSG00000185519	FAM131C	6942	7	7	6.98693	4.39989e-21
chr1	16399560	16399578	3	19	hypo	ENSG00000185519	FAM131C	15305	7	7	6.98693	4.39989e-21
chr1	16778301	16778375	3	75	hypo	ENSG00000157191	NECAP2	11171	5	3	0.595921	0.000445776
chr1	17023121	17023186	6	66	hypo	ENSG00000237847	FAM231A	23655	7	7	NA	NA
chr1	19716911	19717179	6	269	hyper	ENSG00000077549	CAPZB	51778	3	5	-0.341505	0.0665657
chr1	19749771	19749849	3	79	hyper	ENSG00000077549	CAPZB	84543	7	5	-0.341505	0.0665657
chr1	19908916	19909053	3	138	hyper	ENSG00000270136	MINOS1-NBL1	14487	7	7	-0.693377	0.524383
chr1	19926812	19926891	4	80	hypo	ENSG00000173436	MINOS1	3367	5	5	-1.03559	3.56834e-05
chr1	19998761	19998850	3	90	hyper	ENSG00000158748	HTR6	7025	7	7	-0.0525868	NA
chr1	21619150	21619471	3	322	hypo	ENSG00000117298	ECE1	75570	4	3	3.93314	2.31273e-13
chr1	21943046	21943120	4	75	hyper	ENSG00000076864	RAP1GAP	52717	5	5	-2.92954	1.47749e-13
chr1	21977797	21977930	6	134	hypo	ENSG00000076864	RAP1GAP	34063	2	3	-2.92954	1.47749e-13
chr1	24379582	24379770	3	189	hyper	ENSG00000142661	MYOM3	58988	7	7	1.38236	0.0662987
chr1	24718313	24718538	8	226	hypo	ENSG00000001460	STPG1	34936	7	5	1.4403	6.32073e-09
chr1	24750842	24750974	3	133	hypo	ENSG00000001461	NIPAL3	8624	6	5	-0.494711	0.0102927
chr1	25073258	25073359	6	102	hyper	ENSG00000169504	CLIC4	1460	1	1	1.30101	3.89083e-05
chr1	25297050	25297186	9	137	hypo	ENSG00000020633	RUNX3	5616	4	4	1.94792	9.6021e-16
chr1	25433087	25433182	4	96	hyper	ENSG00000117614	SYF2	125849	7	7	0.180915	0.33601
chr1	25655498	25655528	3	31	hyper	ENSG00000187010	RHD	56629	7	7	0.706861	0.0102927
chr1	25892951	25892993	3	43	hypo	ENSG00000157978	LDLRAP1	22901	6	6	-1.79007	1.07417e-08
chr1	25983595	25983607	3	13	hypo	ENSG00000117643	MAN1C1	39642	5	5	-4.00411	8.58984e-13
chr1	26359207	26359359	6	153	hypo	ENSG00000158008	EXTL1	11012	5	4	-2.80312	0.00401548
chr1	26797342	26797387	3	46	hypo	ENSG00000117682	DHDDS	38591	4	5	1.02983	1.23633e-07
chr1	26855761	26855791	3	31	hypo	ENSG00000117676	RPS6KA1	474	2	7	-0.550043	0.00221187
chr1	26906265	26906827	7	563	hypo	ENSG00000117676	RPS6KA1	50294	5	4	-0.550043	0.00221187
chr1	26948636	26948642	3	7	hypo	ENSG00000117713	ARID1A	73883	7	7	0.56244	0.00949439
chr1	27087892	27087961	3	70	hyper	ENSG00000117713	ARID1A	65402	6	6	0.56244	0.00949439
chr1	27165289	27165674	8	386	hypo	ENSG00000204160	ZDHHC18	12280	5	4	2.77216	8.47223e-64
chr1	27276590	27276604	3	15	hypo	ENSG00000175707	C1orf172	544	7	7	-0.544866	0.798626
chr1	27817404	27817410	3	7	hyper	ENSG00000158195	WASF2	737	3	7	0.257331	0.197362
chr1	28208833	28209024	9	192	hypo	ENSG00000130775	THEMIS2	9873	5	3	1.28025	0.000430251
chr1	28230173	28230213	3	41	hypo	ENSG00000117748	RPA2	11758	6	6	0.79269	0.000150229
chr1	28389373	28389385	3	13	hyper	ENSG00000158161	EYA3	92524	4	4	0.410459	0.0536804
chr1	28477018	28477046	3	29	hyper	ENSG00000169403	PTAFR	3355	5	6	-2.44671	2.9115e-08
chr1	30457590	30457824	5	235	hypo	ENSG00000162510	MATN1	738726	4	4	1.18964	0.399468
chr1	31411674	31411698	3	25	hyper	ENSG00000134644	PUM1	5989	6	6	0.80323	0.000458901
chr1	31987800	31987963	3	164	hypo	ENSG00000142910	TINAGL1	54233	5	5	3.88874	1.93304e-10
chr1	32671869	32671884	3	16	hypo	ENSG00000160051	IQCC	640	1	4	-0.270263	0.391641
chr1	32807506	32807999	5	494	hypo	ENSG00000175130	MARCKSL1	5771	7	3	4.67562	1.02037e-51
chr1	33630971	33630987	3	17	hyper	ENSG00000116525	TRIM62	19976	6	7	-0.205909	0.353584
chr1	34374156	34374224	3	69	hyper	ENSG00000121904	CSMD2	394581	7	7	0.0121227	0.986844
chr1	35604862	35605091	5	230	hypo	ENSG00000116560	SFPQ	53772	7	7	0.162719	0.310362
chr1	35659322	35659423	4	102	hypo	ENSG00000116560	SFPQ	622	1	1	0.162719	0.310362
chr1	35730171	35730268	4	98	hypo	ENSG00000146463	ZMYM4	4347	7	4	0.243742	0.24568
chr1	36183263	36183285	3	23	hypo	ENSG00000142686	C1orf216	3798	3	3	-0.803517	0.000760398
chr1	36825621	36825791	5	171	hyper	ENSG00000196182	STK40	20481	5	5	0.105456	0.662609
chr1	38917437	38917658	3	222	hypo	ENSG00000185668	POU3F1	405096	7	7	-1.02367	0.136475
chr1	39249833	39249845	3	13	hypo	ENSG00000116954	RRAGC	75655	7	7	1.56774	6.35505e-13
chr1	39443432	39443485	3	54	hypo	ENSG00000174574	AKIRIN1	13435	7	7	1.44335	2.31445e-15
chr1	39468758	39469066	4	309	hypo	ENSG00000174574	AKIRIN1	12017	3	3	1.44335	2.31445e-15
chr1	39750773	39750870	4	98	hypo	ENSG00000255103	KIAA0754	125328	6	6	-0.91263	0.033622
chr1	40169045	40169163	3	119	hyper	ENSG00000084072	PPIE	11250	7	7	-0.526144	0.0060839
chr1	40903328	40903811	3	484	hypo	ENSG00000187801	ZFP69B	12208	6	5	1.37118	0.00010273
chr1	41799604	41799759	4	156	hyper	ENSG00000204060	FOXO6	27911	7	7	0.701776	0.720087
chr1	41845564	41845621	4	58	hyper	ENSG00000204060	FOXO6	17998	7	7	0.701776	0.720087
chr1	41889413	41889522	6	110	hyper	ENSG00000127129	EDN2	60874	7	7	-0.409498	NA
chr1	42316198	42316441	5	244	hypo	ENSG00000127124	HIVEP3	344283	5	4	-1.72901	2.71093e-05
chr1	43353708	43353774	3	67	hypo	ENSG00000164011	ZNF691	41461	7	7	-0.704319	9.15136e-05
chr1	43446179	43446261	3	83	hyper	ENSG00000117394	SLC2A1	21689	7	4	1.526	8.84136e-06
chr1	44401659	44401760	4	102	hyper	ENSG00000117407	ARTN	2717	3	2	1.15339	0.22486
chr1	45204322	45204374	8	53	hypo	ENSG00000142945	KIF2C	1140	7	7	2.39438	1.45182e-10
chr1	45949346	45949428	5	83	hyper	ENSG00000070759	TESK2	84801	7	7	0.533055	0.0936586
chr1	46035245	46035287	3	43	hyper	ENSG00000117448	AKR1A1	19051	6	6	-1.04475	0.000182075
chr1	47103095	47103301	3	207	hyper	ENSG00000123472	ATPAF1	4789	6	6	-1.60035	2.0763e-21
chr1	51397255	51397421	3	167	hypo	ENSG00000185104	FAF1	492188	7	7	-0.882153	6.04234e-06
chr1	53017128	53017355	7	228	hyper	ENSG00000134744	ZCCHC11	25519	2	1	0.307491	0.303479
chr1	53685487	53685630	4	144	hyper	ENSG00000162384	C1orf123	5787	3	3	-0.470228	0.00196444
chr1	54778680	54778778	4	99	hyper	ENSG00000157216	SSBP3	69819	5	7	-0.751389	0.054237
chr1	57023448	57023633	6	186	hyper	ENSG00000162407	PPAP2B	63121	5	5	-2.18918	2.89011e-07
chr1	62037339	62037941	7	603	hypo	ENSG00000162604	TM2D1	153454	3	4	-0.00948913	0.968506
chr1	64660653	64660805	5	153	hypo	ENSG00000177414	UBE2U	8579	4	4	0.140853	NA
chr1	65006287	65006395	3	109	hyper	ENSG00000158966	CACHD1	69913	7	7	2.29243	7.10737e-07
chr1	67631857	67632028	4	172	hypo	ENSG00000203963	C1orf141	72700	5	4	3.41627	0.0517408
chr1	68030120	68030332	5	213	hypo	ENSG00000116717	GADD45A	120516	7	4	3.16721	6.95605e-15
chr1	68057215	68057370	3	156	hypo	ENSG00000116717	GADD45A	93450	5	4	3.16721	6.95605e-15
chr1	70599146	70599155	3	10	hyper	ENSG00000066557	LRRC40	72152	7	7	0.693646	0.0116786
chr1	70703059	70703196	4	138	hypo	ENSG00000116754	SRSF11	31762	6	6	0.707616	9.78086e-05
chr1	70841853	70842232	6	380	hyper	ENSG00000197568	HHLA3	21554	7	7	-0.162774	0.592851
chr1	76884245	76884636	4	392	hyper	ENSG00000184005	ST6GALNAC3	344036	7	7	1.50858	0.433717
chr1	77511650	77511746	3	97	hyper	ENSG00000117069	ST6GALNAC5	178572	7	7	1.06828	NA
chr1	78186457	78186604	4	148	hypo	ENSG00000077254	USP33	24858	4	1	0.638857	0.00632376
chr1	78291103	78291287	3	185	hyper	ENSG00000180488	FAM73A	45886	7	5	1.16092	9.20243e-05
chr1	79083195	79083368	3	174	hyper	ENSG00000137959	IFI44L	2324	7	7	6.67603	4.02276e-07
chr1	84474834	84475190	3	357	hypo	ENSG00000137941	TTLL7	10178	5	5	1.06273	1.36518e-05
chr1	85435400	85435646	7	247	hypo	ENSG00000153898	MCOLN2	43932	5	3	4.27606	2.3614e-21
chr1	85461300	85461896	10	597	hypo	ENSG00000153898	MCOLN2	70007	1	1	4.27606	2.3614e-21
chr1	87567138	87567414	4	277	hyper	ENSG00000267561	RP5-1052I5.2	108584	7	7	1.00258	NA
chr1	89984079	89984193	4	115	hypo	ENSG00000197147	LRRC8B	6257	5	5	0.12441	0.772805
chr1	90006992	90006998	3	7	hyper	ENSG00000197147	LRRC8B	16600	4	4	0.12441	0.772805
chr1	90066723	90066805	3	83	hypo	ENSG00000171488	LRRC8C	31865	4	5	-1.37765	2.02421e-06
chr1	90723114	90723224	4	111	hypo	ENSG00000162664	ZNF326	262498	7	7	0.698423	0.000113224
chr1	94846842	94847252	4	411	hypo	ENSG00000117528	ABCD3	36884	7	7	-0.826226	0.000525552
chr1	95148847	95148861	3	15	hyper	ENSG00000143036	SLC44A3	137042	7	7	-1.71994	0.170607
chr1	95508282	95508362	3	81	hypo	ENSG00000172339	ALG14	68359	7	4	-0.0637127	0.808623
chr1	101300535	101300698	3	164	hyper	ENSG00000162694	EXTL2	60937	7	7	0.721587	0.065288
chr1	109967254	109967294	4	41	hyper	ENSG00000143106	PSMA5	22855	7	2	0.386751	0.111444
chr1	110630651	110630872	6	222	hypo	ENSG00000156150	ALX3	17438	5	5	0.9187	NA
chr1	110949427	110949439	3	13	hypo	ENSG00000134248	LAMTOR5	5558	1	1	-0.0438941	0.853463
chr1	111097544	111097592	3	49	hypo	ENSG00000143105	KCNA10	35770	7	7	-0.997099	0.414843
chr1	111889506	111889538	3	33	hyper	ENSG00000173947	PIFO	612	2	2	-1.34586	0.509861
chr1	112145439	112146345	10	907	hypo	ENSG00000116473	RAP1A	61052	4	3	-1.35313	1.71354e-08
chr1	113261675	113261716	4	42	hyper	ENSG00000184599	FAM19A3	1344	5	5	-4.78097	1.00489e-06
chr1	113285719	113285740	5	22	hypo	ENSG00000184599	FAM19A3	22688	7	7	-4.78097	1.00489e-06
chr1	113374876	113374996	4	121	hyper	ENSG00000184599	FAM19A3	111895	7	7	-4.78097	1.00489e-06
chr1	114443451	114443467	3	17	hyper	ENSG00000134262	AP4B1	933	6	7	-0.952147	5.56011e-05
chr1	114651265	114651910	7	646	hypo	ENSG00000134207	SYT6	15206	4	4	-3.91463	6.8048e-09
chr1	115323737	115323776	4	40	hypo	ENSG00000052723	SIKE1	449	2	2	0.238238	0.280924
chr1	115880068	115880112	3	45	hypo	ENSG00000134259	NGF	51551	5	7	NA	NA
chr1	116444177	116444314	3	138	hypo	ENSG00000177551	NHLH2	57706	7	7	6.64081	4.8733e-06
chr1	116563413	116563487	3	75	hypo	ENSG00000163393	SLC22A15	44331	7	7	1.30135	1.09791e-05
chr1	116937020	116937152	4	133	hypo	ENSG00000269279	AL136376.1	10367	6	6	-0.463624	NA
chr1	117017494	117017656	3	163	hypo	ENSG00000269279	AL136376.1	90856	7	6	-0.463624	NA
chr1	117129532	117129713	3	182	hypo	ENSG00000143061	IGSF3	12591	4	4	5.70287	1.55107e-24
chr1	117210674	117210690	3	17	hyper	ENSG00000143061	IGSF3	306	2	2	5.70287	1.55107e-24
chr1	117529920	117530009	6	90	hypo	ENSG00000134247	PTGFRN	77285	6	6	-0.94405	8.96673e-05
chr1	120425102	120425173	3	72	hyper	ENSG00000134249	ADAM30	13980	4	5	0.158793	NA
chr1	121254310	121254621	3	312	hyper	ENSG00000198019	FCGR1B	318527	7	7	1.17103	NA
chr1	147014216	147014258	4	43	hyper	ENSG00000116128	BCL9	1055	7	7	-2.41163	5.95192e-14
chr1	150158553	150158698	3	146	hyper	ENSG00000023902	PLEKHO1	37252	1	1	-0.809514	0.00292085
chr1	151029666	151030098	8	433	hypo	ENSG00000197622	CDC42SE1	6435	3	1	1.42054	2.4696e-08
chr1	151169112	151169162	4	51	hyper	ENSG00000143398	PIP5K1A	1286	7	7	0.837038	8.53734e-05
chr1	151247908	151247975	3	68	hypo	ENSG00000143373	ZNF687	6151	7	7	0.520684	0.0131394
chr1	151256058	151256101	4	44	hypo	ENSG00000143373	ZNF687	1985	3	1	0.520684	0.0131394
chr1	153235491	153235736	3	246	hypo	ENSG00000203782	LOR	3437	4	3	3.14508	1.2163e-09
chr1	153704668	153704982	6	315	hypo	ENSG00000143624	INTS3	4282	7	7	-0.866127	7.12089e-05
chr1	153755555	153755586	3	32	hypo	ENSG00000143554	SLC27A3	8740	3	3	-3.37713	7.23754e-13
chr1	153762807	153762919	5	113	hypo	ENSG00000143554	SLC27A3	16033	3	3	-3.37713	7.23754e-13
chr1	153767615	153767699	6	85	hyper	ENSG00000143554	SLC27A3	20827	4	4	-3.37713	7.23754e-13
chr1	153810111	153810143	3	33	hyper	ENSG00000143614	GATAD2B	32926	7	7	0.485237	0.0479118
chr1	153957817	153958259	6	443	hypo	ENSG00000143545	RAB13	3911	3	3	-1.1767	5.04328e-05
chr1	154462261	154462360	3	100	hypo	ENSG00000169291	SHE	10353	4	5	0.874608	0.0496345
chr1	154694056	154694072	3	17	hyper	ENSG00000143603	KCNN3	24133	4	5	0.420712	0.454961
chr1	155044044	155044118	5	75	hyper	ENSG00000143590	EFNA3	7857	4	3	-1.39563	7.27905e-05
chr1	156163296	156163307	3	12	hypo	ENSG00000160785	SLC25A44	577	1	1	-0.677065	5.60589e-05
chr1	156198409	156198458	3	50	hyper	ENSG00000160783	PMF1	15649	4	4	-0.552477	0.0656672
chr1	156427664	156427676	3	13	hypo	ENSG00000125462	C1orf61	28454	4	4	0.83582	7.83106e-05
chr1	156463265	156463421	3	157	hypo	ENSG00000116604	MEF2D	29824	3	3	0.0319391	0.933045
chr1	156691446	156691538	4	93	hypo	ENSG00000143303	RRNAD1	6740	5	5	-0.534271	0.00530604
chr1	156933867	156933957	3	91	hyper	ENSG00000132694	ARHGEF11	29280	3	3	1.45574	3.20626e-06
chr1	158363491	158363908	5	418	hypo	ENSG00000186306	OR10T2	5556	7	4	NA	NA
chr1	161120715	161120766	3	52	hypo	ENSG00000143222	UFC1	2800	7	7	-0.640286	0.00104799
chr1	162530754	162530804	3	51	hyper	ENSG00000117143	UAP1	542	3	3	1.65529	2.00658e-13
chr1	166479782	166480029	4	248	hyper	ENSG00000143157	POGK	328774	7	7	0.092897	0.773343
chr1	168455464	168455542	3	79	hyper	ENSG00000143185	XCL2	57731	7	7	1.66488	0.0101821
chr1	168479138	168479330	4	193	hypo	ENSG00000143185	XCL2	34000	5	4	1.66488	0.0101821
chr1	172496554	172496813	3	260	hypo	ENSG00000094975	SUCO	4804	7	7	2.04704	4.42473e-16
chr1	172750596	172750921	3	326	hypo	ENSG00000117560	FASLG	122604	7	4	2.31085	2.82595e-05
chr1	172987701	172987958	3	258	hypo	ENSG00000120337	TNFSF18	32273	4	5	4.28938	2.3232e-15
chr1	172989720	172989890	5	171	hyper	ENSG00000120337	TNFSF18	30297	3	3	4.28938	2.3232e-15
chr1	173164798	173165082	5	285	hypo	ENSG00000117586	TNFSF4	12066	7	4	6.6012	4.28826e-18
chr1	173267119	173267258	4	140	hypo	ENSG00000117586	TNFSF4	90735	5	4	6.6012	4.28826e-18
chr1	173850910	173850918	3	9	hyper	ENSG00000185278	ZBTB37	13694	7	7	0.237501	0.494766
chr1	173869522	173869750	3	229	hypo	ENSG00000117601	SERPINC1	16879	7	7	0.159757	0.700207
chr1	174552800	174553130	3	331	hypo	ENSG00000203737	GPR52	135753	7	7	4.86765	0.00456909
chr1	177965331	177965600	4	270	hypo	ENSG00000120341	SEC16B	12026	5	5	-1.17834	0.269706
chr1	178291398	178291604	3	207	hypo	ENSG00000075391	RASAL2	228637	7	4	0.137847	0.760164
chr1	179061092	179061289	5	198	hyper	ENSG00000186283	TOR3A	10678	5	5	0.495807	0.0973146
chr1	180052872	180053019	5	148	hyper	ENSG00000135837	CEP350	129072	6	6	2.2556	5.34171e-12
chr1	180452164	180452296	3	133	hyper	ENSG00000135847	ACBD6	194865	5	7	-0.416431	0.0971767
chr1	181012584	181012797	3	214	hypo	ENSG00000153029	MR1	9623	5	3	0.771705	0.000366954
chr1	181075087	181075157	5	71	hypo	ENSG00000162783	IER5	17484	2	2	2.66647	4.1089e-44
chr1	184336317	184336497	9	181	hyper	ENSG00000116667	C1orf21	19783	7	7	2.05302	1.35103e-14
chr1	185260981	185261519	3	539	hyper	ENSG00000116679	IVNS1ABP	25210	4	4	-0.377195	0.452206
chr1	185543563	185543634	4	72	hypo	ENSG00000143341	HMCN1	160083	4	5	2.49662	0.214648
chr1	186788487	186788953	3	467	hyper	ENSG00000116711	PLA2G4A	9363	3	3	0.196904	0.761546
chr1	186847685	186847899	3	215	hypo	ENSG00000116711	PLA2G4A	49707	5	4	0.196904	0.761546
chr1	189076491	189076860	3	370	hypo	ENSG00000162670	BRINP3	1370083	7	7	NA	NA
chr1	192514284	192514436	4	153	hypo	ENSG00000090104	RGS1	30495	3	1	6.33532	2.40528e-51
chr1	193533141	193533309	10	169	hyper	ENSG00000162630	B3GALT2	377440	7	7	1.74456	0.0140265
chr1	195414614	195414954	4	341	hyper	ENSG00000162687	KCNT2	1163570	7	7	1.73204	NA
chr1	196250250	196250452	4	203	hypo	ENSG00000162687	KCNT2	53082	7	7	1.73204	NA
chr1	197378711	197378998	8	288	hyper	ENSG00000134376	CRB1	208262	7	7	0.497646	0.367844
chr1	200275383	200275395	3	13	hyper	ENSG00000162702	ZNF281	103794	4	5	0.788733	0.0154942
chr1	200316167	200316176	4	10	hypo	ENSG00000162702	ZNF281	63012	5	7	0.788733	0.0154942
chr1	201372948	201373427	11	480	hypo	ENSG00000159166	LAD1	4450	5	4	7.29856	6.03404e-41
chr1	202363813	202363988	4	176	hypo	ENSG00000077157	PPP1R12B	46073	7	7	-0.627619	0.0126819
chr1	202963495	202963741	3	247	hyper	ENSG00000163444	TMEM183A	12894	5	7	-0.450672	0.0102135
chr1	202995317	202995366	3	50	hyper	ENSG00000143847	PPFIA4	283	2	1	1.33795	0.0212512
chr1	204653186	204653242	4	57	hypo	ENSG00000170382	LRRN2	66916	7	7	0.847229	0.0241139
chr1	205263657	205263738	3	82	hypo	ENSG00000163545	NUAK2	27185	5	4	5.09539	3.90897e-27
chr1	205898633	205898800	4	168	hypo	ENSG00000174502	SLC26A9	16540	4	3	3.20741	4.51644e-19
chr1	206643375	206643387	3	13	hypo	ENSG00000143466	IKBKE	408	3	3	1.07156	0.00293097
chr1	208082582	208082645	3	64	hyper	ENSG00000174059	CD34	22729	7	7	-0.265066	0.477558
chr1	208855838	208856231	4	394	hyper	ENSG00000076356	PLXNA2	438368	7	7	-1.19263	4.42194e-05
chr1	209758925	209759000	5	76	hyper	ENSG00000008118	CAMK1G	1900	5	7	6.33006	5.39343e-25
chr1	211311915	211312063	3	149	hypo	ENSG00000143473	KCNH1	4531	7	7	4.40794	0.0389691
chr1	211430715	211430780	3	66	hypo	ENSG00000117625	RCOR3	970	3	3	0.636004	0.00580275
chr1	211513092	211513416	7	325	hypo	ENSG00000082512	TRAF5	13297	4	4	1.91287	1.62226e-09
chr1	212300762	212300878	3	117	hyper	ENSG00000143476	DTL	91901	5	5	1.45893	1.60754e-05
chr1	212823217	212823293	4	77	hypo	ENSG00000162771	FAM71A	25466	7	7	0.81275	0.62663
chr1	212823769	212823949	3	181	hypo	ENSG00000162771	FAM71A	26070	6	7	0.81275	0.62663
chr1	212855046	212856095	8	1050	hypo	ENSG00000123685	BATF3	17756	4	4	0.77841	0.00126427
chr1	212923485	212923883	5	399	hypo	ENSG00000117697	NSL1	13386	4	4	-0.133924	0.530604
chr1	212954270	212954302	3	33	hypo	ENSG00000117697	NSL1	43988	5	3	-0.133924	0.530604
chr1	213102105	213102274	3	170	hypo	ENSG00000143494	VASH2	21671	7	7	3.54414	8.6862e-18
chr1	213224311	213224319	3	9	hyper	ENSG00000136643	RPS6KC1	272	3	3	0.949023	0.000490048
chr1	214576041	214576099	3	59	hyper	ENSG00000152104	PTPN14	54031	7	7	0.15679	0.676281
chr1	214996636	214996762	3	127	hypo	ENSG00000082482	KCNK2	182417	7	7	0.950348	NA
chr1	218155955	218156004	3	50	hyper	ENSG00000067533	RRP15	302648	7	7	-0.882501	0.000570863
chr1	222730212	222730493	3	282	hyper	ENSG00000143512	HHIPL2	8906	6	6	-0.67849	0.718689
chr1	222885771	222885791	4	21	hypo	ENSG00000186063	AIDA	42862	1	1	1.31376	4.44116e-09
chr1	224238640	224238663	3	24	hypo	ENSG00000269358	AC138393.1	22279	7	7	-1.00472	0.384448
chr1	224326046	224326115	3	70	hypo	ENSG00000143756	FBXO28	24291	6	6	0.454077	0.0794368
chr1	224331994	224332226	5	233	hypo	ENSG00000143756	FBXO28	30321	7	6	0.454077	0.0794368
chr1	224407340	224407558	4	219	hypo	ENSG00000143753	DEGS1	43991	4	4	0.611138	0.0232098
chr1	225040876	225041254	3	379	hyper	ENSG00000185842	DNAH14	42897	7	7	-0.573861	0.0538255
chr1	225705606	225705834	3	229	hypo	ENSG00000154380	ENAH	31183	5	7	0.894529	0.12157
chr1	226204666	226204752	3	87	hypo	ENSG00000143751	SDE2	17676	7	7	1.35024	1.91537e-08
chr1	226369653	226369711	3	59	hyper	ENSG00000182827	ACBD3	37302	5	5	0.67683	0.00403244
chr1	226852375	226852460	5	86	hypo	ENSG00000143772	ITPKB	74606	3	3	-0.192586	0.664813
chr1	227447176	227447302	6	127	hypo	ENSG00000143776	CDC42BPA	269673	7	5	1.36567	7.79121e-08
chr1	227763094	227763352	5	259	hypo	ENSG00000181450	ZNF678	11979	7	7	-0.105347	0.785415
chr1	228932711	228932853	3	143	hyper	ENSG00000116574	RHOU	61958	7	7	-1.16405	0.0138047
chr1	228987690	228987829	4	140	hyper	ENSG00000116574	RHOU	116935	4	5	-1.16405	0.0138047
chr1	228988394	228988607	3	214	hypo	ENSG00000116574	RHOU	117676	4	5	-1.16405	0.0138047
chr1	229760652	229760673	3	22	hyper	ENSG00000135801	TAF5L	31794	3	3	1.1046	2.03998e-10
chr1	229809963	229810057	4	95	hyper	ENSG00000135763	URB2	48029	7	7	0.266354	0.27107
chr1	230812038	230812205	4	168	hypo	ENSG00000135775	COG2	33883	6	6	-0.479637	0.00439255
chr1	231189016	231189063	5	48	hyper	ENSG00000182118	FAM89A	13046	4	2	-0.823166	0.0112054
chr1	235757214	235757251	3	38	hyper	ENSG00000168243	GNG4	46245	7	7	2.18707	0.00226224
chr1	235977910	235978194	4	285	hypo	ENSG00000143669	LYST	55493	5	4	2.36591	5.24573e-09
chr1	235994233	235995057	8	825	hypo	ENSG00000143669	LYST	72086	3	4	2.36591	5.24573e-09
chr1	236245336	236245455	3	120	hyper	ENSG00000116962	NID1	16932	5	7	6.25055	3.31795e-25
chr1	236323233	236323536	7	304	hypo	ENSG00000077585	GPR137B	17552	4	4	1.51278	4.67555e-06
chr1	236326883	236327217	3	335	hypo	ENSG00000077585	GPR137B	21218	7	4	1.51278	4.67555e-06
chr1	243646965	243647013	5	49	hyper	ENSG00000054282	SDCCAG8	227669	7	3	-0.951255	1.17019e-06
chr1	244314119	244314460	4	342	hypo	ENSG00000268146	AL590483.1	86657	7	4	0.702515	NA
chr1	246473549	246473901	4	353	hyper	ENSG00000185420	SMYD3	196888	5	5	-1.60595	6.93916e-12
chr1	246978450	246978514	3	65	hyper	ENSG00000143653	SCCPDH	91133	7	7	-0.206565	0.436401
chr1	248613672	248613928	3	257	hypo	ENSG00000196240	OR2T2	2275	7	7	NA	NA
chr10	1001471	1001528	3	58	hypo	ENSG00000107929	LARP4B	23934	4	7	0.447416	0.00659842
chr10	1549350	1549419	3	70	hyper	ENSG00000185736	ADARB2	321311	7	7	0.0636622	0.93938
chr10	3111550	3111595	7	46	hypo	ENSG00000067057	PFKP	3047	1	1	-1.31095	3.78874e-14
chr10	3929019	3929883	15	865	hypo	ENSG00000067082	KLF6	101977	7	4	2.31416	6.56291e-18
chr10	4002018	4002057	3	40	hyper	ENSG00000067082	KLF6	174563	4	4	2.31416	6.56291e-18
chr10	4075600	4075922	3	323	hypo	ENSG00000067082	KLF6	248287	7	4	2.31416	6.56291e-18
chr10	4563563	4563575	3	13	hypo	ENSG00000165568	AKR1E2	265250	7	7	0.83086	1.65937e-05
chr10	5024038	5024117	3	80	hyper	ENSG00000151632	AKR1C2	36129	7	7	0.381344	0.398068
chr10	5336037	5336231	4	195	hypo	ENSG00000178473	UCN3	70836	7	7	0.200826	NA
chr10	5624439	5624861	12	423	hypo	ENSG00000178363	CALML3	57726	4	4	2.69713	NA
chr10	5885834	5886168	4	335	hypo	ENSG00000057608	GDI2	1905	7	4	-0.0977596	0.648189
chr10	6437631	6437882	6	252	hyper	ENSG00000212743	DKFZP667F0711	45478	7	7	1.22925	0.0122341
chr10	7307194	7307454	6	261	hyper	ENSG00000198879	SFMBT2	103075	5	5	1.69585	0.000214948
chr10	8173401	8173456	4	56	hypo	ENSG00000107485	GATA3	76772	5	7	1.65599	2.57726e-05
chr10	9052406	9052727	3	322	hypo	ENSG00000107485	GATA3	955910	7	7	1.65599	2.57726e-05
chr10	11241680	11242283	8	604	hypo	ENSG00000048740	CELF2	194722	5	4	2.00426	9.12161e-18
chr10	11318184	11318867	14	684	hypo	ENSG00000048740	CELF2	271266	6	4	2.00426	9.12161e-18
chr10	11386849	11386921	7	73	hypo	ENSG00000148429	USP6NL	266867	3	3	0.117374	0.681942
chr10	11423659	11423683	3	25	hypo	ENSG00000148429	USP6NL	230081	7	7	0.117374	0.681942
chr10	11625479	11625485	3	7	hyper	ENSG00000148429	USP6NL	129537	7	7	0.117374	0.681942
chr10	11792985	11793036	3	52	hyper	ENSG00000134463	ECHDC3	8645	5	5	-0.338524	0.249508
chr10	12306798	12306804	3	7	hypo	ENSG00000165609	NUDT5	68657	4	4	-1.16758	4.09201e-07
chr10	12677044	12677477	10	434	hypo	ENSG00000183049	CAMK1D	285779	4	3	0.434091	0.0501307
chr10	12742263	12742459	4	197	hyper	ENSG00000183049	CAMK1D	350880	7	7	0.434091	0.0501307
chr10	13150185	13150282	3	98	hyper	ENSG00000123240	OPTN	8784	5	5	3.22052	9.65792e-14
chr10	13690677	13690754	4	78	hypo	ENSG00000239665	RP11-295P9.3	38668	6	6	-0.791331	1.51024e-05
chr10	13812340	13812404	4	65	hyper	ENSG00000239665	RP11-295P9.3	160325	7	7	-0.791331	1.51024e-05
chr10	14791321	14791368	3	48	hypo	ENSG00000065809	FAM107B	230785	5	5	2.85008	1.05032e-17
chr10	15140222	15140292	4	71	hypo	ENSG00000152464	RPP38	1078	1	1	-0.488518	0.0585298
chr10	16862469	16862564	4	96	hyper	ENSG00000148484	RSU1	2988	5	7	0.0827071	0.834791
chr10	20164729	20165139	3	411	hyper	ENSG00000120594	PLXDC2	59766	5	5	-2.4222	2.31218e-06
chr10	23183864	23184024	4	161	hyper	ENSG00000165309	ARMC3	33007	4	3	0.975178	NA
chr10	26791915	26792292	6	378	hyper	ENSG00000077420	APBB1IP	64971	7	5	-3.46174	6.95574e-20
chr10	27025927	27026218	3	292	hypo	ENSG00000148459	PDSS1	39484	3	3	0.920305	0.000466387
chr10	27029189	27029488	3	300	hypo	ENSG00000148459	PDSS1	42750	7	4	0.920305	0.000466387
chr10	27825181	27825263	3	83	hypo	ENSG00000099246	RAB18	32025	4	3	0.933178	4.19863e-05
chr10	28623852	28624021	7	170	hypo	ENSG00000150054	MPP7	520	7	7	0.502666	0.191486
chr10	28779025	28779165	3	141	hyper	ENSG00000095787	WAC	42325	7	7	0.469025	0.0216065
chr10	29011790	29011832	4	43	hyper	ENSG00000095739	BAMBI	45540	7	7	3.1575	4.45327e-09
chr10	29276509	29276916	5	408	hypo	ENSG00000204365	C10orf126	141375	7	7	2.56913	0.394472
chr10	29905551	29905712	3	162	hyper	ENSG00000197321	SVIL	159364	5	5	-0.396099	0.293587
chr10	30764736	30764908	4	173	hyper	ENSG00000107968	MAP3K8	41956	7	7	1.54277	1.70894e-05
chr10	30799620	30800044	7	425	hypo	ENSG00000107968	MAP3K8	76966	4	4	1.54277	1.70894e-05
chr10	30823491	30823499	3	9	hyper	ENSG00000151033	LYZL2	95195	7	7	NA	NA
chr10	31468224	31468360	4	137	hypo	ENSG00000148516	ZEB1	139760	7	4	2.59301	4.39937e-29
chr10	31919921	31920235	3	315	hypo	ENSG00000165322	ARHGAP12	297663	7	4	0.197375	0.496672
chr10	32233686	32233932	3	247	hyper	ENSG00000165322	ARHGAP12	16066	5	5	0.197375	0.496672
chr10	32297346	32297437	3	92	hyper	ENSG00000170759	KIF5B	47967	6	6	0.400689	0.127127
chr10	33446264	33446364	3	101	hyper	ENSG00000150093	ITGB1	151593	7	5	-0.436921	0.214183
chr10	33650761	33651065	3	305	hyper	ENSG00000099250	NRP1	25722	7	7	-1.38963	0.0104425
chr10	34062965	34063028	3	64	hypo	ENSG00000099250	NRP1	437805	5	7	-1.38963	0.0104425
chr10	34530359	34530536	3	178	hyper	ENSG00000148498	PARD3	131959	7	7	0.860006	0.329802
chr10	34663469	34663505	3	37	hypo	ENSG00000148498	PARD3	264999	4	5	0.860006	0.329802
chr10	34885468	34885557	3	90	hypo	ENSG00000148498	PARD3	487024	5	5	0.860006	0.329802
chr10	35438222	35438730	7	509	hypo	ENSG00000095794	CREM	22757	5	4	1.85888	2.82185e-09
chr10	35723074	35723307	4	234	hyper	ENSG00000108100	CCNY	187237	5	5	-0.602718	0.00529767
chr10	35829890	35829957	3	68	hypo	ENSG00000108100	CCNY	293970	7	5	-0.602718	0.00529767
chr10	37571147	37571277	3	131	hyper	ENSG00000148513	ANKRD30A	156427	7	7	0.430385	0.850071
chr10	43133196	43133257	3	62	hyper	ENSG00000196693	ZNF33B	48671	7	2	1.16485	6.65985e-05
chr10	43960571	43960583	3	13	hyper	ENSG00000243660	ZNF487	28295	7	7	1.01434	0.000208517
chr10	44553025	44553118	4	94	hyper	ENSG00000269515	AL137026.1	320614	7	7	NA	NA
chr10	44789061	44789119	6	59	hyper	ENSG00000269515	AL137026.1	84595	7	7	NA	NA
chr10	47151300	47151330	3	31	hyper	ENSG00000150165	ANXA8L1	22777	7	7	4.69754	6.23924e-06
chr10	48366318	48366581	6	264	hypo	ENSG00000165388	ZNF488	11425	7	7	-2.03248	2.34557e-05
chr10	48377766	48377850	5	85	hyper	ENSG00000107618	RBP3	13182	7	7	0.207331	NA
chr10	48657889	48658216	5	328	hypo	ENSG00000183675	PTPN20B	169881	5	5	0.695196	0.687669
chr10	50399137	50399534	5	398	hypo	ENSG00000204161	C10orf128	2898	4	3	-1.95571	3.49418e-08
chr10	50452143	50452214	3	72	hypo	ENSG00000177354	C10orf71	55007	3	4	0.195411	0.720096
chr10	50742776	50742951	3	176	hyper	ENSG00000225830	ERCC6	4093	4	3	-1.2944	7.09094e-06
chr10	55685173	55685204	3	32	hypo	ENSG00000150275	PCDH15	104249	7	7	-0.438546	NA
chr10	63627803	63627946	3	144	hypo	ENSG00000150347	ARID5B	33183	7	7	2.14681	3.3487e-08
chr10	63761762	63761997	5	236	hypo	ENSG00000150347	ARID5B	100820	7	4	2.14681	3.3487e-08
chr10	64645913	64645953	3	41	hyper	ENSG00000122877	EGR2	67005	5	5	-2.70833	5.13444e-12
chr10	64752030	64752537	10	508	hypo	ENSG00000148572	NRBF2	140765	7	4	0.0629485	0.80621
chr10	64873701	64874001	3	301	hyper	ENSG00000148572	NRBF2	19197	7	7	0.0629485	0.80621
chr10	70004802	70004930	3	129	hypo	ENSG00000179774	ATOH7	12994	7	7	1.17219	NA
chr10	70813673	70813868	7	196	hypo	ENSG00000122862	SRGN	34102	4	4	2.74663	1.30079e-15
chr10	71620288	71620379	4	92	hypo	ENSG00000197467	COL13A1	58689	5	7	2.08485	0.0298725
chr10	72354546	72354771	5	226	hyper	ENSG00000180644	PRF1	7872	5	7	1.83281	3.35149e-05
chr10	72659008	72659043	3	36	hyper	ENSG00000166228	PCBD1	10483	7	7	-1.09865	3.44992e-11
chr10	73059755	73059878	3	124	hypo	ENSG00000107731	UNC5B	87489	4	5	-2.51588	2.39636e-11
chr10	73460004	73460233	3	230	hyper	ENSG00000214688	C10orf105	37462	7	7	-7.17739	1.49766e-21
chr10	73793980	73794287	9	308	hypo	ENSG00000107742	SPOCK2	54656	5	5	0.765836	0.00297824
chr10	73808050	73808087	4	38	hypo	ENSG00000107742	SPOCK2	40721	7	7	0.765836	0.00297824
chr10	74303764	74303813	3	50	hyper	ENSG00000107745	MICU1	176690	7	7	-0.536539	0.00263344
chr10	75238289	75238450	3	162	hypo	ENSG00000107758	PPP3CB	41805	6	6	0.461205	0.0215999
chr10	75917362	75917634	5	273	hyper	ENSG00000156110	ADK	6538	7	7	-0.14795	0.584381
chr10	76142076	76142166	4	91	hyper	ENSG00000156110	ADK	231161	7	4	-0.14795	0.584381
chr10	76299071	76299557	4	487	hypo	ENSG00000156110	ADK	388354	7	4	-0.14795	0.584381
chr10	76453282	76453389	4	108	hypo	ENSG00000156110	ADK	542375	7	4	-0.14795	0.584381
chr10	76555616	76555679	5	64	hypo	ENSG00000156650	KAT6B	29691	7	7	0.672334	0.00598079
chr10	77471761	77471810	3	50	hypo	ENSG00000148655	C10orf11	70732	7	7	-2.1079	2.64201e-09
chr10	78270108	78270595	6	488	hypo	ENSG00000148655	C10orf11	727832	5	3	-2.1079	2.64201e-09
chr10	79342549	79342747	3	199	hypo	ENSG00000156113	KCNMA1	698009	5	7	-0.416916	0.633874
chr10	79691910	79692115	3	206	hyper	ENSG00000151208	DLG5	5633	7	7	0.0475219	0.921092
chr10	80019372	80019399	3	28	hyper	ENSG00000138326	RPS24	225867	7	5	-1.02872	3.92312e-06
chr10	80674438	80675252	9	815	hypo	ENSG00000108175	ZMIZ1	153945	5	4	0.006982	0.985447
chr10	80724569	80724610	3	42	hyper	ENSG00000108175	ZMIZ1	104201	7	6	0.006982	0.985447
chr10	80900157	80900217	3	61	hyper	ENSG00000108175	ZMIZ1	71395	6	5	0.006982	0.985447
chr10	81915434	81915868	9	435	hypo	ENSG00000122359	ANXA11	5006	5	4	-0.724922	0.000116774
chr10	86301014	86301079	3	66	hypo	ENSG00000107771	CCSER2	212704	7	7	1.85475	1.19893e-14
chr10	89416095	89416208	4	114	hyper	ENSG00000198682	PAPSS2	3217	7	7	1.55954	0.00490935
chr10	89870607	89870787	3	181	hypo	ENSG00000227268	KLLN	247502	5	3	0.991479	0.00031685
chr10	90501768	90502051	4	284	hypo	ENSG00000204021	LIPK	17608	7	7	NA	NA
chr10	90602839	90603196	5	358	hypo	ENSG00000152766	ANKRD22	21128	7	4	4.28124	1.67953e-15
chr10	91397058	91397154	3	97	hyper	ENSG00000152782	PANK1	54357	7	7	-0.927571	0.00669221
chr10	96164124	96164140	4	17	hyper	ENSG00000108239	TBC1D12	1871	1	1	0.304977	0.236264
chr10	96203628	96203664	3	37	hypo	ENSG00000108239	TBC1D12	41385	7	7	0.304977	0.236264
chr10	96944147	96944167	3	21	hyper	ENSG00000173124	C10orf129	9798	7	7	-2.51265	NA
chr10	98460745	98460992	3	248	hyper	ENSG00000155629	PIK3AP1	107799	3	4	-0.0620533	0.934435
chr10	98734284	98734465	3	182	hypo	ENSG00000155640	C10orf12	6665	7	3	1.06154	6.73218e-05
chr10	98743844	98743917	3	74	hyper	ENSG00000155640	C10orf12	2839	5	5	1.06154	6.73218e-05
chr10	98841551	98841609	5	59	hyper	ENSG00000187122	SLIT1	83785	7	7	1.10544	NA
chr10	99416632	99416722	4	91	hyper	ENSG00000155252	PI4K2A	72546	5	3	1.72074	1.18255e-10
chr10	99581513	99581710	4	198	hypo	ENSG00000155265	GOLGA7B	28383	7	7	-0.866886	0.103468
chr10	101473091	101473452	3	362	hyper	ENSG00000014919	COX15	1670	5	6	-0.327706	0.0667545
chr10	101610720	101610828	3	109	hyper	ENSG00000023839	ABCC2	68285	7	7	1.46561	1.29383e-07
chr10	101741622	101741927	4	306	hyper	ENSG00000107554	DNMBP	106440	4	5	-1.23638	0.0154942
chr10	101743117	101743411	7	295	hyper	ENSG00000107554	DNMBP	107930	4	5	-1.23638	0.0154942
chr10	102803105	102803299	4	195	hypo	ENSG00000107819	SFXN3	12211	3	2	-1.2895	1.23654e-08
chr10	103140245	103140321	4	77	hypo	ENSG00000166167	BTRC	26463	5	5	-0.0243062	0.935636
chr10	104228195	104228251	3	57	hyper	ENSG00000138111	TMEM180	7074	7	4	-0.48113	0.0817572
chr10	105319011	105319076	3	66	hypo	ENSG00000107954	NEURL1	65307	5	5	-1.14898	0.000258298
chr10	112127385	112127915	9	531	hypo	ENSG00000119953	SMNDC1	62940	7	4	1.31017	2.5178e-06
chr10	112155563	112155880	4	318	hypo	ENSG00000119953	SMNDC1	91011	7	4	1.31017	2.5178e-06
chr10	112170325	112170715	5	391	hypo	ENSG00000138166	DUSP5	87074	5	3	3.83302	7.28313e-30
chr10	112498325	112498553	5	229	hyper	ENSG00000203867	RBM20	94284	7	7	0.0928641	0.891013
chr10	112577591	112578203	7	613	hypo	ENSG00000203867	RBM20	173742	5	7	0.0928641	0.891013
chr10	114192134	114192275	4	142	hypo	ENSG00000023041	ZDHHC6	2146	3	3	0.460093	0.0196279
chr10	114913518	114913574	3	57	hyper	ENSG00000148737	TCF7L2	203537	5	5	0.340905	0.346836
chr10	115022022	115022065	3	44	hyper	ENSG00000148702	HABP2	288551	7	7	2.06908	NA
chr10	115805613	115805760	4	148	hypo	ENSG00000043591	ADRB1	1880	2	2	0.432618	0.662825
chr10	116307363	116307440	8	78	hypo	ENSG00000099204	ABLIM1	111688	7	7	3.32812	1.50837e-11
chr10	119132990	119132996	3	7	hypo	ENSG00000165650	PDZD8	92993	1	1	0.51115	0.070927
chr10	119255637	119255724	3	88	hypo	ENSG00000170370	EMX2	46273	7	7	0.0481497	0.982366
chr10	120535201	120535442	4	242	hyper	ENSG00000151893	CACUL1	20559	7	7	0.386647	0.0934495
chr10	120591610	120592091	9	482	hyper	ENSG00000151893	CACUL1	77088	4	7	0.386647	0.0934495
chr10	120972895	120972992	3	98	hyper	ENSG00000198873	GRK5	5842	7	7	-0.329795	0.319003
chr10	121040347	121040625	4	279	hyper	ENSG00000198873	GRK5	73385	7	7	-0.329795	0.319003
chr10	121176589	121176745	5	157	hyper	ENSG00000198873	GRK5	209566	7	7	-0.329795	0.319003
chr10	122451198	122451355	3	158	hypo	ENSG00000177234	C10orf85	93555	7	7	1.26959	NA
chr10	123710834	123710976	3	143	hypo	ENSG00000107669	ATE1	22588	7	7	0.121887	0.67326
chr10	126182114	126182162	3	49	hypo	ENSG00000107902	LHPP	31735	4	3	-1.78447	2.8604e-14
chr10	126431328	126431349	7	22	hypo	ENSG00000189319	FAM53B	75579	3	3	-0.420819	0.145927
chr10	126565268	126565313	3	46	hyper	ENSG00000019995	ZRANB1	65400	7	7	0.669534	0.000218451
chr10	126604768	126604857	5	90	hyper	ENSG00000019995	ZRANB1	25878	3	1	0.669534	0.000218451
chr10	126746996	126747088	7	93	hyper	ENSG00000175029	CTBP2	19427	7	7	0.500014	0.0551954
chr10	127794818	127794965	3	148	hyper	ENSG00000148848	ADAM12	93941	4	5	-0.162147	0.820488
chr10	127917638	127917785	4	148	hypo	ENSG00000148848	ADAM12	216761	5	3	-0.162147	0.820488
chr10	128165210	128165389	5	180	hyper	ENSG00000154493	C10orf90	51165	7	7	4.36161	0.0166008
chr10	129706423	129706544	3	122	hyper	ENSG00000132334	PTPRE	1158	5	2	-1.75343	0.000463039
chr10	129717002	129717075	5	74	hyper	ENSG00000132334	PTPRE	11713	4	5	-1.75343	0.000463039
chr10	131265774	131265810	4	37	hyper	ENSG00000170430	MGMT	344	1	1	-2.59926	2.00922e-11
chr10	131420475	131420582	3	108	hyper	ENSG00000170430	MGMT	155080	7	7	-2.59926	2.00922e-11
chr10	132887372	132887453	3	82	hyper	ENSG00000176769	TCERG1L	222571	7	7	0.470539	0.637105
chr10	133761540	133761727	4	188	hyper	ENSG00000175470	PPP2R2D	13678	6	6	0.195892	0.281031
chr10	134076939	134077063	3	125	hyper	ENSG00000165752	STK32C	36677	5	5	-3.83837	2.44892e-18
chr10	134230845	134230849	3	5	hyper	ENSG00000171813	PWWP2B	20175	4	5	-1.92576	3.28033e-09
chr10	134431176	134431398	6	223	hyper	ENSG00000068383	INPP5A	79963	7	6	-0.665652	0.00165273
chr10	134554051	134554101	3	51	hypo	ENSG00000068383	INPP5A	202752	6	5	-0.665652	0.00165273
chr10	134649562	134649602	3	41	hyper	ENSG00000148826	NKX6-2	50025	7	7	1.20218	NA
chr10	134831302	134831330	3	29	hypo	ENSG00000197177	GPR123	53115	7	7	-0.676236	NA
chr10	135066730	135066839	3	110	hyper	ENSG00000151650	VENTX	15876	7	7	-3.04342	2.37156e-07
chr10	135078447	135078487	3	41	hypo	ENSG00000151651	ADAM8	2560	7	5	2.19432	3.75264e-14
chr10	135107451	135107574	8	124	hypo	ENSG00000130640	TUBGCP2	14366	5	4	-0.264525	0.197808
chr10	135132757	135132837	4	81	hypo	ENSG00000130640	TUBGCP2	6955	7	7	-0.264525	0.197808
chr10	135173425	135173517	3	93	hypo	ENSG00000148803	FUOM	1941	7	7	-1.01898	0.00127261
chr11	348397	348590	4	194	hyper	ENSG00000142089	IFITM3	20955	7	7	2.08266	0.0820109
chr11	394499	394584	6	86	hyper	ENSG00000184363	PKP3	1927	7	7	-1.7729	NA
chr11	430995	431001	3	7	hypo	ENSG00000185101	ANO9	12735	7	7	2.19727	1.23785e-07
chr11	519403	519438	4	36	hypo	ENSG00000023191	RNH1	12119	7	7	-0.660013	0.00348059
chr11	596561	596671	5	111	hypo	ENSG00000070047	PHRF1	20130	6	6	-0.06693	0.803851
chr11	617901	617954	3	54	hypo	ENSG00000099834	CDHR5	1350	6	6	-0.0662695	0.953468
chr11	662277	662406	3	130	hyper	ENSG00000177030	DEAF1	18108	5	5	-1.14348	4.75684e-08
chr11	882909	882945	3	37	hypo	ENSG00000177830	CHID1	15067	6	6	-2.72277	6.03499e-14
chr11	975938	975989	4	52	hyper	ENSG00000183020	AP2A2	50091	6	6	-1.75133	8.60031e-08
chr11	1991156	1991210	5	55	hyper	ENSG00000214026	MRPL23	22675	7	7	-1.1745	7.33622e-05
chr11	2497906	2498009	3	104	hyper	ENSG00000053918	KCNQ1	32043	7	6	-1.38065	1.72373e-10
chr11	2688467	2688525	4	59	hypo	ENSG00000129757	CDKN1C	218614	6	6	0.251759	0.704063
chr11	2872680	2872786	3	107	hypo	ENSG00000129757	CDKN1C	34377	7	7	0.251759	0.704063
chr11	3805860	3806094	4	235	hypo	ENSG00000110713	NUP98	109737	4	3	1.08063	3.42519e-05
chr11	5631900	5632063	5	164	hyper	ENSG00000258588	TRIM6-TRIM34	14026	5	5	NA	NA
chr11	8112587	8112665	4	79	hyper	ENSG00000166402	TUB	71835	7	7	1.49304	0.351418
chr11	9340445	9340470	3	26	hypo	ENSG00000166471	TMEM41B	4129	7	7	0.849658	3.59826e-06
chr11	9994307	9994686	6	380	hyper	ENSG00000133812	SBF2	194282	6	7	1.02047	0.000306117
chr11	10336499	10336519	3	21	hyper	ENSG00000133805	AMPD3	2707	7	4	2.19998	1.65801e-10
chr11	10383917	10384302	3	386	hyper	ENSG00000133805	AMPD3	44891	7	7	2.19998	1.65801e-10
chr11	10645485	10645589	3	105	hyper	ENSG00000072952	MRVI1	50899	5	7	0.70691	0.122386
chr11	10930958	10931211	4	254	hyper	ENSG00000236287	ZBED5	50740	5	7	-0.301577	0.0773737
chr11	12021812	12021838	3	27	hyper	ENSG00000050165	DKK3	35887	7	7	0.170714	0.826048
chr11	12916161	12916210	3	50	hypo	ENSG00000187079	TEAD1	220216	7	7	3.00141	9.92682e-06
chr11	13488170	13488305	4	136	hypo	ENSG00000148925	BTBD10	3392	7	7	-0.125863	0.53654
chr11	14390646	14390683	4	38	hyper	ENSG00000133818	RRAS2	4611	7	7	1.48354	0.000493047
chr11	14695462	14695569	3	108	hyper	ENSG00000152270	PDE3B	30246	7	7	-0.314791	0.537276
chr11	17103961	17104156	6	196	hyper	ENSG00000110700	RPS13	4723	7	7	-0.751437	2.90154e-06
chr11	17452676	17452881	6	206	hyper	ENSG00000006071	ABCC8	38346	7	7	1.86663	NA
chr11	17579748	17579921	4	174	hyper	ENSG00000188162	OTOG	10914	7	7	-0.570425	0.516164
chr11	18299779	18300097	4	319	hyper	ENSG00000173432	SAA1	12217	4	5	2.59557	0.0871528
chr11	20149888	20149961	3	74	hypo	ENSG00000109851	DBX1	32234	7	7	NA	NA
chr11	22191262	22191541	3	280	hypo	ENSG00000171714	ANO5	23319	7	7	-0.63648	0.369759
chr11	23208209	23208291	4	83	hyper	ENSG00000255359	CCDC179	326277	7	7	1.10999	NA
chr11	27484242	27484271	3	30	hyper	ENSG00000205213	LGR4	96748	4	4	-2.73986	6.23045e-08
chr11	32421969	32422039	3	71	hyper	ENSG00000184937	WT1	12683	7	7	1.74159	0.118671
chr11	34037493	34037565	3	73	hyper	ENSG00000135387	CAPRIN1	35699	7	7	0.138322	0.622514
chr11	34253319	34253385	4	67	hypo	ENSG00000166016	ABTB2	80817	7	4	6.1948	8.90176e-33
chr11	34265242	34265563	5	322	hypo	ENSG00000166016	ABTB2	92867	4	3	6.1948	8.90176e-33
chr11	34393515	34393692	3	178	hyper	ENSG00000166016	ABTB2	14047	4	4	6.1948	8.90176e-33
chr11	35150398	35150614	3	217	hyper	ENSG00000269766	AL356215.1	290	7	7	NA	NA
chr11	35314140	35314262	3	123	hypo	ENSG00000110436	SLC1A2	41429	4	3	5.24391	9.77019e-23
chr11	35340762	35340953	3	192	hyper	ENSG00000110436	SLC1A2	68085	4	4	5.24391	9.77019e-23
chr11	35880745	35881064	4	320	hypo	ENSG00000179241	LDLRAD3	84625	7	4	2.2515	0.000750722
chr11	35942759	35942824	4	66	hyper	ENSG00000179241	LDLRAD3	22738	7	7	2.2515	0.000750722
chr11	35993328	35993977	7	650	hypo	ENSG00000179241	LDLRAD3	28121	7	4	2.2515	0.000750722
chr11	36023980	36024163	5	184	hyper	ENSG00000179241	LDLRAD3	58540	7	7	2.2515	0.000750722
chr11	36199235	36199326	3	92	hyper	ENSG00000179241	LDLRAD3	233749	4	5	2.2515	0.000750722
chr11	36366653	36366676	3	24	hypo	ENSG00000135362	PRR5L	48826	7	7	3.79506	7.15686e-49
chr11	37251994	37252088	3	95	hyper	ENSG00000175097	RAG2	632254	7	7	-0.879387	NA
chr11	39354476	39354607	3	132	hypo	ENSG00000148948	LRRC4C	2126781	7	7	-1.33499	NA
chr11	40717157	40717351	3	195	hyper	ENSG00000148948	LRRC4C	581411	7	7	-1.33499	NA
chr11	43411484	43411677	4	194	hyper	ENSG00000052841	TTC17	31098	6	6	0.0693384	0.801773
chr11	44148547	44148746	3	200	hypo	ENSG00000151348	EXT2	31547	6	6	-0.700299	0.000141882
chr11	44328535	44328685	6	151	hypo	ENSG00000052850	ALX4	46616	7	7	-1.67284	0.497926
chr11	45233868	45233903	3	36	hyper	ENSG00000019485	PRDM11	118321	5	7	-0.466532	0.151931
chr11	45868449	45868501	3	53	hyper	ENSG00000121671	CRY2	192	3	3	0.53583	0.00060072
chr11	47442889	47442959	3	71	hyper	ENSG00000165916	PSMC3	2571	6	6	0.131247	0.71244
chr11	47670241	47670290	3	50	hyper	ENSG00000109919	MTCH2	6089	7	7	-0.357146	0.018342
chr11	47819336	47819414	3	79	hypo	ENSG00000109920	FNBP4	30381	5	5	1.1093	1.89915e-07
chr11	48125115	48125639	11	525	hypo	ENSG00000149177	PTPRJ	123264	7	4	1.38843	0.000569898
chr11	55482635	55483058	9	424	hyper	ENSG00000181903	OR4C6	50232	7	7	NA	NA
chr11	55710417	55710708	3	292	hypo	ENSG00000167825	OR5I1	6685	7	7	NA	NA
chr11	58736145	58736153	3	9	hyper	ENSG00000166840	GLYATL1	41047	7	7	-1.84661	NA
chr11	59667169	59667535	7	367	hyper	ENSG00000134827	TCN1	33303	7	7	-1.76002	0.00573216
chr11	59712705	59712731	3	27	hyper	ENSG00000214788	OOSP1	6790	7	7	-0.804508	NA
chr11	60266365	60266533	4	169	hyper	ENSG00000071203	MS4A12	6198	5	5	6.32227	5.90422e-07
chr11	60710816	60711028	6	213	hyper	ENSG00000110446	SLC15A3	9079	3	3	0.64949	0.0039614
chr11	60712076	60712138	3	63	hypo	ENSG00000110446	SLC15A3	7894	5	3	0.64949	0.0039614
chr11	60879767	60880325	7	559	hyper	ENSG00000110448	CD5	10179	5	5	2.89357	2.47471e-06
chr11	61109992	61110107	6	116	hyper	ENSG00000149476	DAK	9367	5	6	-0.55669	0.0050329
chr11	61150823	61150866	4	44	hypo	ENSG00000187049	TMEM216	8313	4	5	-0.896967	7.48547e-08
chr11	61739694	61739803	3	110	hypo	ENSG00000269089	AP003733.1	4295	7	1	1.40665	6.84842e-05
chr11	61771888	61771947	3	60	hypo	ENSG00000269089	AP003733.1	36464	4	4	1.40665	6.84842e-05
chr11	61788314	61788347	3	34	hyper	ENSG00000269089	AP003733.1	52877	4	4	1.40665	6.84842e-05
chr11	63376472	63376685	6	214	hypo	ENSG00000176485	PLA2G16	34632	4	5	3.27594	1.09913e-17
chr11	64070434	64070666	5	233	hyper	ENSG00000219435	TEX40	2687	7	7	-2.43069	NA
chr11	64125983	64126189	5	207	hypo	ENSG00000162302	RPS6KA4	532	3	3	-0.681091	0.000326786
chr11	64258473	64258486	4	14	hyper	ENSG00000181908	AP003774.4	41933	7	7	-1.70547	0.0131242
chr11	64554905	64555028	3	124	hyper	ENSG00000168066	SF1	8707	6	6	0.644353	1.30951e-05
chr11	64738923	64738943	3	21	hyper	ENSG00000168070	C11orf85	33230	7	7	0.140853	NA
chr11	64879047	64879080	6	34	hypo	ENSG00000149809	TM7SF2	252	5	5	-0.407218	0.181986
chr11	64885551	64885571	3	21	hyper	ENSG00000174276	ZNHIT2	390	7	7	-0.466002	0.120344
chr11	64924962	64925098	3	137	hyper	ENSG00000204710	SPDYC	12593	4	5	-1.63469	0.193558
chr11	64957522	64957664	4	143	hypo	ENSG00000254614	AP003068.23	8287	3	3	0.141573	0.676967
chr11	65047377	65047433	5	57	hypo	ENSG00000014138	POLA2	18172	4	4	-0.758852	3.09687e-06
chr11	65096830	65096871	4	42	hypo	ENSG00000133884	DPF2	4373	4	5	0.107986	0.601893
chr11	65447618	65447630	3	13	hyper	ENSG00000173039	RELA	17058	7	7	1.31467	3.96181e-11
chr11	65652097	65652117	3	21	hyper	ENSG00000172500	FIBP	715	5	6	-1.07924	4.10486e-07
chr11	65824120	65824304	6	185	hypo	ENSG00000087365	SF3B2	4410	6	3	0.196332	0.350418
chr11	66104446	66104594	9	149	hypo	ENSG00000174791	RIN1	208	5	5	-1.49779	2.57439e-07
chr11	66252239	66252452	3	214	hypo	ENSG00000254986	DPP3	4861	6	5	0.0618454	0.815034
chr11	66688337	66688491	5	155	hyper	ENSG00000173599	PC	72418	4	3	0.512971	0.304037
chr11	66697126	66697553	5	428	hypo	ENSG00000173599	PC	81343	7	4	0.512971	0.304037
chr11	66875360	66875394	4	35	hypo	ENSG00000173120	KDM2A	11361	7	7	1.14163	9.94031e-12
chr11	66890018	66890085	4	68	hypo	ENSG00000173120	KDM2A	3311	7	2	1.14163	9.94031e-12
chr11	66913200	66913446	4	247	hypo	ENSG00000173120	KDM2A	26583	6	5	1.14163	9.94031e-12
chr11	67118522	67118631	4	110	hyper	ENSG00000175482	POLD4	2440	7	7	-0.639937	0.0186389
chr11	67187954	67188029	4	76	hypo	ENSG00000172508	CARNS1	4842	3	3	-2.38712	8.30412e-08
chr11	67401182	67401264	4	83	hyper	ENSG00000167800	TBX10	2449	7	7	1.11108	NA
chr11	67652752	67652806	3	55	hyper	ENSG00000110057	UNC93B1	119672	7	7	-0.0909874	0.843921
chr11	67770404	67770430	3	27	hyper	ENSG00000110057	UNC93B1	4560	3	3	-0.0909874	0.843921
chr11	67917847	67918011	3	165	hypo	ENSG00000110721	CHKA	29017	7	7	-0.0240985	0.946551
chr11	68476498	68476517	3	20	hypo	ENSG00000132749	MTL5	1599	7	7	0.380193	0.395833
chr11	68826123	68826151	4	29	hypo	ENSG00000162341	TPCN2	9772	5	5	0.859198	1.27582e-05
chr11	68889075	68889107	3	33	hyper	ENSG00000162341	TPCN2	72726	5	7	0.859198	1.27582e-05
chr11	69258851	69258901	4	51	hyper	ENSG00000110092	CCND1	196977	3	3	-1.65236	0.0128893
chr11	69458442	69458475	3	34	hyper	ENSG00000110092	CCND1	2603	5	7	-1.65236	0.0128893
chr11	71200349	71200515	5	167	hypo	ENSG00000172890	NADSYN1	36277	6	5	-0.107729	0.625965
chr11	71896880	71896889	3	10	hyper	ENSG00000110195	FOLR1	3716	7	7	-2.48163	NA
chr11	72099084	72099170	3	87	hyper	ENSG00000162129	CLPB	95658	4	5	-0.707577	0.00376798
chr11	72284377	72284562	3	186	hypo	ENSG00000186642	PDE2A	101027	7	7	0.448492	0.707605
chr11	73311518	73311587	4	70	hypo	ENSG00000054965	FAM168A	2317	7	7	0.021106	0.948303
chr11	73711382	73711478	3	97	hypo	ENSG00000175564	UCP3	104	7	4	0.421536	0.334154
chr11	74316587	74316716	4	130	hypo	ENSG00000077514	POLD3	111755	6	4	-0.497059	0.0307486
chr11	74953594	74953656	4	63	hyper	ENSG00000261594	TPBGL	1675	7	7	-4.09877	1.67213e-10
chr11	76574308	76574676	3	369	hyper	ENSG00000078124	ACER3	2581	1	3	-0.939493	5.09276e-05
chr11	76902881	76903023	4	143	hypo	ENSG00000137474	MYO7A	63642	7	7	-2.51815	6.44525e-06
chr11	77482116	77482217	3	102	hyper	ENSG00000048649	RSF1	111125	5	5	0.818401	7.29054e-05
chr11	78149737	78149853	3	117	hyper	ENSG00000033327	GAB2	20400	5	5	1.19502	9.11716e-10
chr11	78520113	78520206	3	94	hyper	ENSG00000149256	TENM4	156283	7	7	2.93749	0.253972
chr11	79070694	79070958	3	265	hyper	ENSG00000149256	TENM4	706950	7	7	2.93749	0.253972
chr11	79117505	79117730	5	226	hyper	ENSG00000149256	TENM4	753741	7	7	2.93749	0.253972
chr11	81623726	81624024	3	299	hyper	ENSG00000182103	FAM181B	821030	7	7	3.98891	0.0709894
chr11	82706223	82706650	3	428	hypo	ENSG00000137502	RAB30	16126	5	3	2.84187	4.30533e-19
chr11	83227897	83227936	3	40	hyper	ENSG00000150672	DLG2	58954	7	7	-1.13172	0.170838
chr11	85726716	85726930	3	215	hypo	ENSG00000073921	PICALM	56941	4	4	0.336647	0.4405
chr11	85991093	85991354	7	262	hyper	ENSG00000149196	C11orf73	22028	6	6	-0.186332	0.313454
chr11	89597267	89597307	6	41	hyper	ENSG00000189253	TRIM64B	11897	7	7	-0.345417	0.852602
chr11	95449031	95449514	3	484	hyper	ENSG00000166037	CEP57	73855	7	4	0.0757246	0.815717
chr11	102164071	102164533	8	463	hypo	ENSG00000023445	BIRC3	23922	7	4	6.53837	1.96937e-07
chr11	102216585	102216972	8	388	hypo	ENSG00000110330	BIRC2	1165	4	3	2.34104	1.73195e-20
chr11	102274594	102274916	3	323	hyper	ENSG00000152558	TMEM123	7688	5	4	1.188	0.000115184
chr11	102422018	102422347	5	330	hypo	ENSG00000137673	MMP7	20697	5	4	6.11228	5.7567e-44
chr11	102423080	102423184	4	105	hypo	ENSG00000137673	MMP7	21647	7	4	6.11228	5.7567e-44
chr11	102947315	102947348	3	34	hypo	ENSG00000137692	DCUN1D5	14523	5	5	-0.673633	0.000480631
chr11	102980900	102980992	5	93	hypo	ENSG00000187240	DYNC2H1	786	2	2	-1.25075	0.0117265
chr11	104427694	104427863	4	170	hypo	ENSG00000204403	CASP12	341618	5	5	NA	NA
chr11	108069697	108069819	4	123	hyper	ENSG00000149308	NPAT	41816	4	4	0.372519	0.240612
chr11	110220270	110220902	8	633	hypo	ENSG00000137710	RDX	53138	4	4	1.98342	1.1755e-10
chr11	111585938	111585978	3	41	hyper	ENSG00000170145	SIK2	112843	6	6	1.48016	4.94921e-07
chr11	111913638	111913838	4	201	hypo	ENSG00000150768	DLAT	18200	6	6	0.800011	1.61416e-05
chr11	112096625	112096720	4	96	hypo	ENSG00000150787	PTS	414	1	1	0.0109625	0.976526
chr11	115795900	115796690	5	791	hypo	ENSG00000182985	CADM1	420619	7	4	2.35879	5.39718e-08
chr11	116726316	116726423	4	108	hyper	ENSG00000160584	SIK3	10060	4	5	0.709871	0.0433115
chr11	116933977	116934176	3	200	hypo	ENSG00000160584	SIK3	217767	5	4	0.709871	0.0433115
chr11	117009599	117009685	3	87	hyper	ENSG00000168092	PAFAH1B2	5339	7	7	0.584412	0.00295933
chr11	117899672	117899843	4	172	hyper	ENSG00000110324	IL10RA	42694	4	4	0.753307	1.8513e-07
chr11	118476517	118476676	3	160	hyper	ENSG00000019144	PHLDB1	557	7	5	3.01133	2.62823e-22
chr11	118691778	118692031	4	254	hypo	ENSG00000110367	DDX6	30058	4	4	1.54176	1.64239e-05
chr11	119309481	119309602	3	122	hyper	ENSG00000154096	THY1	13845	7	7	0.838098	0.433371
chr11	120040733	120040749	3	17	hyper	ENSG00000176984	AP000679.2	1056	5	5	1.5243	0.350284
chr11	120788760	120789018	3	259	hypo	ENSG00000149403	GRIK4	406421	7	7	5.56597	9.90919e-11
chr11	121567778	121567800	3	23	hyper	ENSG00000137642	SORL1	244877	7	7	-0.297987	0.339978
chr11	122112354	122112450	3	97	hyper	ENSG00000259571	BLID	125478	5	7	NA	NA
chr11	122125075	122125120	3	46	hypo	ENSG00000259571	BLID	138173	5	7	NA	NA
chr11	122487421	122487443	3	23	hyper	ENSG00000154127	UBASH3B	38949	5	7	-0.549331	0.500582
chr11	122528027	122528064	4	38	hyper	ENSG00000154127	UBASH3B	1662	3	2	-0.549331	0.500582
chr11	122546110	122546273	4	164	hypo	ENSG00000154127	UBASH3B	19808	5	5	-0.549331	0.500582
chr11	122616717	122616784	4	68	hypo	ENSG00000154127	UBASH3B	90367	4	4	-0.549331	0.500582
chr11	123252316	123252602	4	287	hypo	ENSG00000254667	AP000783.1	48597	4	3	0.773657	0.36835
chr11	123252987	123253428	5	442	hypo	ENSG00000254667	AP000783.1	47849	4	4	0.773657	0.36835
chr11	124351082	124351216	3	135	hypo	ENSG00000197125	OR8B8	40094	7	7	-0.676236	NA
chr11	124540646	124540767	3	122	hyper	ENSG00000110013	SIAE	37697	4	5	-2.09272	1.01696e-13
chr11	124993503	124993883	5	381	hypo	ENSG00000150433	TMEM218	12033	4	3	-0.305785	0.39615
chr11	125068518	125068799	4	282	hyper	ENSG00000165495	PKNOX2	34056	7	7	0.907957	0.50746
chr11	126169365	126169740	5	376	hypo	ENSG00000255062	RP11-712L6.5	5359	6	4	-0.584947	0.245322
chr11	128584122	128584274	5	153	hypo	ENSG00000151702	FLI1	27768	4	4	-2.26664	1.04925e-10
chr11	129328348	129328620	4	273	hyper	ENSG00000043039	BARX2	82649	7	7	0.243134	0.564159
chr11	129688253	129688379	3	127	hypo	ENSG00000151715	TMEM45B	2602	7	7	-4.81976	1.36343e-05
chr11	132952053	132952103	5	51	hyper	ENSG00000183715	OPCML	667203	7	7	4.18758	NA
chr11	133617339	133617453	3	115	hypo	ENSG00000166118	SPATA19	98036	7	7	0.974926	NA
chr11	134632622	134632715	7	94	hyper	ENSG00000268936	AP003062.1	222576	7	7	NA	NA
chr12	643616	643687	4	72	hypo	ENSG00000139044	B4GALNT3	74121	7	7	-2.49162	2.24817e-08
chr12	778202	778548	10	347	hypo	ENSG00000171840	NINJ2	5429	7	4	-0.527659	0.234568
chr12	788246	788572	6	327	hypo	ENSG00000171840	NINJ2	15463	7	4	-0.527659	0.234568
chr12	950924	951239	7	316	hypo	ENSG00000060237	WNK1	89322	4	3	1.14531	0.000228902
chr12	1262086	1262316	4	231	hypo	ENSG00000082805	ERC1	162526	5	5	0.380139	0.1936
chr12	1289458	1289470	4	13	hyper	ENSG00000082805	ERC1	189789	7	6	0.380139	0.1936
chr12	1801429	1801715	4	287	hyper	ENSG00000006831	ADIPOR2	1379	1	3	0.263928	0.0930072
chr12	2028281	2028824	6	544	hyper	ENSG00000151062	CACNA2D4	549	3	3	-1.00295	0.0689838
chr12	2045720	2045810	6	91	hyper	ENSG00000151062	CACNA2D4	17762	6	7	-1.00295	0.0689838
chr12	2191441	2191483	3	43	hyper	ENSG00000151067	CACNA1C	111510	7	7	-0.73804	0.157438
chr12	2977220	2977457	6	238	hypo	ENSG00000111206	FOXM1	10489	6	7	0.176118	0.484367
chr12	4085679	4086105	5	427	hypo	ENSG00000111224	PARP11	103283	5	4	0.461053	0.121802
chr12	4255525	4255813	6	289	hypo	ENSG00000118971	CCND2	127267	7	5	0.659156	0.0245809
chr12	5162367	5162811	5	445	hypo	ENSG00000130037	KCNA5	9504	5	5	3.52395	0.133646
chr12	6151235	6151270	3	36	hyper	ENSG00000110799	VWF	93212	7	7	-0.226471	0.549729
chr12	6301241	6301430	3	190	hypo	ENSG00000010278	CD9	7544	7	7	-0.299938	0.213245
chr12	6852120	6852507	4	388	hypo	ENSG00000111652	COPS7A	19406	7	4	-0.368751	0.0152067
chr12	6968544	6968589	3	46	hyper	ENSG00000111667	USP5	7274	6	6	-0.0860589	0.746797
chr12	7115807	7115950	3	144	hypo	ENSG00000182326	C1S	19527	5	5	3.29371	8.74504e-16
chr12	8421761	8422054	4	294	hyper	ENSG00000171847	FAM90A1	41692	7	7	-3.90351	3.52853e-13
chr12	9555380	9555409	3	30	hypo	ENSG00000126838	PZP	194427	7	7	0.154603	0.83525
chr12	10180185	10180287	3	103	hyper	ENSG00000197992	CLEC9A	3038	4	4	-1.06672	0.101287
chr12	10768275	10768457	3	183	hypo	ENSG00000111196	MAGOHB	2143	7	4	0.497184	0.0103937
chr12	11721916	11722202	3	287	hypo	ENSG00000139083	ETV6	80727	5	5	1.28702	2.27644e-13
chr12	11869949	11870067	4	119	hyper	ENSG00000139083	ETV6	67220	5	3	1.28702	2.27644e-13
chr12	11977108	11977450	6	343	hypo	ENSG00000139083	ETV6	174491	4	4	1.28702	2.27644e-13
chr12	11983355	11983441	3	87	hypo	ENSG00000139083	ETV6	180610	4	4	1.28702	2.27644e-13
chr12	12402296	12402405	3	110	hypo	ENSG00000070018	LRP6	62328	7	7	1.62176	5.27513e-11
chr12	12420856	12420954	4	99	hypo	ENSG00000070018	LRP6	958	7	7	1.62176	5.27513e-11
chr12	12486910	12487145	3	236	hypo	ENSG00000111261	MANSC1	4829	7	7	-0.215217	0.722032
chr12	13128658	13128867	4	210	hyper	ENSG00000013583	HEBP1	964	6	6	-1.08619	9.10386e-07
chr12	13253207	13253236	3	30	hyper	ENSG00000111305	GSG1	16179	4	4	0.367533	0.190563
chr12	14595300	14595528	3	229	hypo	ENSG00000171681	ATF7IP	76798	5	5	1.02675	0.00196444
chr12	14948118	14948293	4	176	hypo	ENSG00000084463	WBP11	8795	6	4	0.719923	0.00131637
chr12	19624759	19624942	3	184	hypo	ENSG00000139154	AEBP2	67871	5	5	1.22471	1.73088e-07
chr12	20705540	20705553	4	14	hyper	ENSG00000172572	PDE3A	183367	7	7	-0.150313	0.835055
chr12	22639192	22639238	3	47	hypo	ENSG00000111731	C2CD5	37698	7	7	-0.900772	8.26399e-06
chr12	22806273	22806549	4	277	hyper	ENSG00000139163	ETNK1	28402	5	5	0.122061	0.696957
chr12	23358135	23358475	3	341	hyper	ENSG00000139163	ETNK1	580296	7	7	0.122061	0.696957
chr12	25844119	25844239	5	121	hyper	ENSG00000152936	IFLTD1	42665	7	7	1.35182	0.0124499
chr12	25928497	25928586	3	90	hyper	ENSG00000152936	IFLTD1	127027	7	7	1.35182	0.0124499
chr12	25938229	25938241	3	13	hypo	ENSG00000152936	IFLTD1	136721	7	7	1.35182	0.0124499
chr12	26325512	26326217	11	706	hypo	ENSG00000123096	SSPN	50940	7	4	4.91741	2.81839e-14
chr12	27536914	27537142	5	229	hyper	ENSG00000029153	ARNTL2	51241	7	7	2.9412	1.47713e-12
chr12	29532872	29533034	3	163	hyper	ENSG00000087502	ERGIC2	23592	2	1	0.123064	0.610548
chr12	30337321	30337630	5	310	hypo	ENSG00000133687	TMTC1	399782	7	7	-0.988778	0.00697773
chr12	31347765	31348134	3	370	hypo	ENSG00000013573	DDX11	121170	7	7	-0.221733	0.262088
chr12	32674202	32674422	3	221	hyper	ENSG00000139132	FGD4	121849	7	1	-0.540466	0.363433
chr12	40704684	40705097	3	414	hypo	ENSG00000205592	MUC19	82305	5	5	-0.158664	0.899993
chr12	41796794	41797061	4	268	hyper	ENSG00000165966	PDZRN4	214677	5	5	2.48788	NA
chr12	44198976	44199149	6	174	hypo	ENSG00000151239	TWF1	11536	1	1	0.423863	0.0742091
chr12	44440383	44440534	3	152	hypo	ENSG00000139173	TMEM117	210572	7	7	-2.01275	7.16798e-07
chr12	46694745	46694840	3	96	hyper	ENSG00000111371	SLC38A1	31057	4	5	3.38809	4.7965e-16
chr12	47611854	47612176	8	323	hypo	ENSG00000179715	PCED1B	138629	4	4	-1.75395	7.2363e-06
chr12	47787504	47787679	3	176	hypo	ENSG00000005175	RPAP3	312252	5	4	1.31691	2.65473e-13
chr12	49320386	49320425	3	40	hyper	ENSG00000255863	AC073610.5	4638	7	7	NA	NA
chr12	49504967	49505053	4	87	hypo	ENSG00000139636	LMBR1L	328	1	1	1.48836	7.08996e-09
chr12	49943395	49943420	3	26	hypo	ENSG00000135519	KCNH3	10467	7	7	-0.666348	0.193935
chr12	50045704	50045747	3	44	hypo	ENSG00000135436	FAM186B	46302	6	6	2.93811	3.52015e-10
chr12	50669018	50669107	4	90	hypo	ENSG00000050405	LIMA1	99491	7	7	0.597429	0.222341
chr12	50771955	50772035	3	81	hyper	ENSG00000185958	FAM186A	51982	7	7	-1.34617	0.00447581
chr12	51058361	51058444	4	84	hypo	ENSG00000066084	DIP2B	159512	6	4	0.385539	0.192579
chr12	51168107	51168113	3	7	hypo	ENSG00000123268	ATF1	10617	7	5	-0.176019	0.538061
chr12	51452953	51453432	6	480	hypo	ENSG00000050426	LETMD1	11447	6	6	-0.368546	0.107689
chr12	51792460	51792690	8	231	hypo	ENSG00000050438	SLC4A8	7474	5	3	-0.657482	0.104092
chr12	52709687	52709714	3	28	hyper	ENSG00000267873	AC121757.1	572	7	7	NA	NA
chr12	53466838	53466968	3	131	hyper	ENSG00000167778	SPRYD3	8515	4	5	-0.04518	0.847958
chr12	54421335	54421532	3	198	hypo	ENSG00000198353	HOXC4	10718	7	7	0.9187	NA
chr12	54476283	54476320	3	38	hypo	ENSG00000273266	HOXC4	28640	7	7	NA	NA
chr12	54699295	54699462	4	168	hypo	ENSG00000111481	COPZ1	4392	4	5	-0.30758	0.0526004
chr12	56047012	56047057	3	46	hypo	ENSG00000175398	OR10P1	16390	7	7	-0.676494	NA
chr12	56050085	56050116	3	32	hyper	ENSG00000175398	OR10P1	19456	7	7	-0.676494	NA
chr12	56308923	56309321	4	399	hypo	ENSG00000170473	WIBG	13297	1	1	0.65042	0.000458693
chr12	56472748	56472797	3	50	hyper	ENSG00000065361	ERBB3	867	2	2	0.247855	0.611071
chr12	58141804	58141969	3	166	hypo	ENSG00000135452	TSPAN31	3222	5	4	0.23012	0.224874
chr12	58298862	58298868	3	7	hypo	ENSG00000166896	XRCC6BP1	36493	7	7	-0.541203	0.0282861
chr12	62586883	62586937	3	55	hypo	ENSG00000198673	FAM19A2	439451	5	7	0.772694	0.0154798
chr12	62867866	62868227	4	362	hyper	ENSG00000061987	MON2	7449	7	7	0.595212	0.0151663
chr12	63126696	63126898	4	203	hyper	ENSG00000111110	PPM1H	89035	4	4	-1.29569	3.75679e-05
chr12	64037695	64037748	3	54	hypo	ENSG00000177990	DPY19L2	24907	7	7	0.110583	0.836678
chr12	66564254	66564266	3	13	hypo	ENSG00000155957	TMBIM4	407	1	3	-0.704576	0.000591674
chr12	68629957	68629987	3	31	hypo	ENSG00000111536	IL26	10370	5	7	0.616645	0.501932
chr12	68763779	68763987	4	209	hypo	ENSG00000111554	MDM1	37721	5	4	-0.124019	0.721539
chr12	69869412	69869568	3	157	hypo	ENSG00000166225	FRS2	5361	5	3	1.5239	2.55674e-08
chr12	70032905	70033211	5	307	hypo	ENSG00000198812	LRRC10	28115	7	7	1.25005	0.481836
chr12	70033757	70033861	3	105	hyper	ENSG00000198812	LRRC10	28866	7	7	1.25005	0.481836
chr12	70698942	70698959	3	18	hypo	ENSG00000111596	CNOT2	62176	7	7	0.00944982	0.971462
chr12	72068705	72068801	3	97	hyper	ENSG00000258064	RP11-293I14.2	769	5	5	NA	NA
chr12	74930754	74930760	3	7	hyper	ENSG00000253719	ATXN7L3B	792	7	4	0.165227	0.419212
chr12	79959674	79959730	6	57	hypo	ENSG00000177425	PAWR	125174	7	7	0.82019	0.0335089
chr12	80292380	80292711	3	332	hypo	ENSG00000058272	PPP1R12A	124359	7	7	0.569779	0.0229194
chr12	81651287	81651778	3	492	hypo	ENSG00000111052	LIN7A	319827	7	7	1.62456	1.68644e-06
chr12	88693480	88693696	4	217	hypo	ENSG00000139324	TMTC3	157515	7	4	0.583724	0.0634924
chr12	89657407	89657590	3	184	hyper	ENSG00000139318	DUSP6	89549	7	7	0.739116	0.269819
chr12	92405050	92405267	4	218	hypo	ENSG00000257242	C12orf79	26292	7	7	5.04589	5.30639e-37
chr12	92458687	92459112	9	426	hypo	ENSG00000257242	C12orf79	80033	5	4	5.04589	5.30639e-37
chr12	92758045	92758166	3	122	hyper	ENSG00000257127	CLLU1	59628	4	7	1.90191	1.00376e-05
chr12	92896440	92897335	11	896	hypo	ENSG00000205057	CLLU1OS	74962	4	4	4.37051	0.000203206
chr12	92900190	92900517	3	328	hypo	ENSG00000205057	CLLU1OS	78428	4	4	4.37051	0.000203206
chr12	92946931	92947924	14	994	hypo	ENSG00000205057	CLLU1OS	125502	4	4	4.37051	0.000203206
chr12	93295365	93295634	3	270	hyper	ENSG00000102189	EEA1	131086	4	5	0.177367	0.62116
chr12	94010361	94010488	4	128	hypo	ENSG00000120833	SOCS2	46834	5	3	4.6185	2.7829e-29
chr12	94018722	94019073	3	352	hypo	ENSG00000169372	CRADD	52252	7	4	0.193877	0.375946
chr12	94179109	94179216	4	108	hypo	ENSG00000169372	CRADD	108011	7	4	0.193877	0.375946
chr12	94602291	94602316	4	26	hypo	ENSG00000136040	PLXNC1	59804	3	1	4.92413	2.57625e-17
chr12	94656787	94656885	6	99	hypo	ENSG00000136040	PLXNC1	114337	3	4	4.92413	2.57625e-17
chr12	94960130	94960254	3	125	hyper	ENSG00000057704	TMCC3	84145	7	7	4.62542	1.26171e-24
chr12	96363221	96363257	4	37	hyper	ENSG00000139344	AMDHD1	26168	7	7	-1.70689	0.0011452
chr12	96838388	96838549	4	162	hypo	ENSG00000059758	CDK17	44129	7	7	2.68735	2.48887e-20
chr12	97300410	97300429	3	20	hypo	ENSG00000139350	NEDD1	580	3	1	0.91329	0.00147636
chr12	97316493	97316623	3	131	hypo	ENSG00000139350	NEDD1	15557	6	6	0.91329	0.00147636
chr12	98723496	98723707	4	212	hyper	ENSG00000245017	RP11-181C3.1	174031	7	7	-0.586816	0.201002
chr12	101062878	101063029	5	152	hyper	ENSG00000151572	ANO4	48349	7	7	0.43729	NA
chr12	102155173	102155407	5	235	hyper	ENSG00000111670	GNPTAB	16015	5	5	0.444105	0.159378
chr12	104026486	104026583	6	98	hyper	ENSG00000136011	STAB2	45483	7	7	-1.83802	0.000688049
chr12	104609317	104609352	4	36	hypo	ENSG00000198431	TXNRD1	221	2	3	1.75051	3.4842e-11
chr12	104697862	104697956	10	95	hypo	ENSG00000255150	EID3	392	3	3	1.94876	1.11173e-10
chr12	104977210	104977354	3	145	hyper	ENSG00000171310	CHST11	126536	5	5	1.63253	1.2526e-07
chr12	105026846	105026888	3	43	hyper	ENSG00000171310	CHST11	176121	7	5	1.63253	1.2526e-07
chr12	105032327	105032887	5	561	hypo	ENSG00000171310	CHST11	181861	3	1	1.63253	1.2526e-07
chr12	105045717	105045898	5	182	hyper	ENSG00000171310	CHST11	195061	4	4	1.63253	1.2526e-07
chr12	105217795	105217936	3	142	hyper	ENSG00000136052	SLC41A2	134656	7	7	2.4097	1.69693e-14
chr12	105894425	105894746	7	322	hyper	ENSG00000235162	C12orf75	170171	7	7	2.64349	8.68459e-14
chr12	106224059	106224162	3	104	hyper	ENSG00000074590	NUAK1	309700	7	7	2.76208	0.00124708
chr12	108323215	108323303	3	89	hyper	ENSG00000187855	ASCL4	155097	7	7	0.0901944	0.953651
chr12	108689465	108689575	5	111	hyper	ENSG00000174600	CMKLR1	4072	5	7	-2.30835	0.000587416
chr12	110216990	110217367	5	378	hyper	ENSG00000111199	TRPV4	54033	7	7	-1.76284	0.0442278
chr12	110270843	110270919	4	77	hyper	ENSG00000111199	TRPV4	49988	2	1	-1.76284	0.0442278
chr12	110452872	110452880	3	9	hypo	ENSG00000076513	ANKRD13A	15885	1	3	0.509043	0.00703086
chr12	110782924	110783098	3	175	hyper	ENSG00000196510	ANAPC7	58523	3	3	-0.732492	0.000607074
chr12	111129147	111129423	4	277	hypo	ENSG00000122986	HVCN1	30245	4	5	-2.09822	6.53358e-15
chr12	111978287	111978567	4	281	hyper	ENSG00000204842	ATXN2	88409	6	6	0.685274	0.00168747
chr12	112297556	112297751	4	196	hyper	ENSG00000089022	MAPKAPK5	17871	7	7	0.0220908	0.927693
chr12	112452200	112452232	3	33	hyper	ENSG00000089248	ERP29	1096	1	1	-1.55804	2.41937e-07
chr12	112513497	112513566	3	70	hyper	ENSG00000111300	NAA25	49031	3	3	3.13566	6.85961e-24
chr12	112587246	112587888	9	643	hypo	ENSG00000135148	TRAFD1	24262	6	5	2.6784	1.12317e-17
chr12	112590259	112590619	6	361	hypo	ENSG00000135148	TRAFD1	27134	6	3	2.6784	1.12317e-17
chr12	113531266	113531309	3	44	hyper	ENSG00000135144	DTX1	35792	5	7	-2.68114	1.50105e-08
chr12	114149663	114149899	3	237	hypo	ENSG00000089116	LHX5	239903	7	7	0.548301	0.487648
chr12	114408189	114408494	4	306	hypo	ENSG00000122965	RBM19	4164	7	5	0.512909	0.0203573
chr12	115129242	115129287	3	46	hyper	ENSG00000135111	TBX3	7294	7	2	1.67866	NA
chr12	116978491	116978646	5	156	hypo	ENSG00000171471	MAP1LC3B2	18616	5	4	0.592977	0.0128371
chr12	118703589	118703623	3	35	hypo	ENSG00000135090	TAOK3	116000	5	3	0.759582	0.000350428
chr12	118762840	118763063	4	224	hypo	ENSG00000135090	TAOK3	175345	5	4	0.759582	0.000350428
chr12	119626344	119626409	3	66	hyper	ENSG00000152137	HSPB8	9929	7	7	7.52137	3.11381e-06
chr12	120108337	120108699	4	363	hypo	ENSG00000111725	PRKAB1	2960	4	3	1.00599	9.35785e-07
chr12	120445227	120445887	5	661	hyper	ENSG00000135127	CCDC64	17884	7	7	3.13381	2.75093e-18
chr12	120451555	120451819	3	265	hypo	ENSG00000135127	CCDC64	24014	7	4	3.13381	2.75093e-18
chr12	120525525	120525573	3	49	hypo	ENSG00000135127	CCDC64	97876	3	3	3.13381	2.75093e-18
chr12	120552989	120553128	3	140	hypo	ENSG00000111737	RAB35	18888	3	3	-0.182972	0.31961
chr12	121347455	121347810	3	356	hypo	ENSG00000157837	SPPL3	5457	7	4	0.257507	0.122659
chr12	121631143	121631391	3	249	hypo	ENSG00000135124	P2RX4	16391	7	5	1.49349	1.89241e-07
chr12	121729967	121730128	5	162	hyper	ENSG00000110931	CAMKK2	54547	4	7	0.245235	0.111519
chr12	121974146	121974157	4	12	hyper	ENSG00000089094	KDM2B	42502	3	1	2.17146	7.45778e-23
chr12	122266791	122266922	5	132	hypo	ENSG00000139718	SETD1B	24770	6	6	0.204238	0.445729
chr12	122287700	122287816	8	117	hyper	ENSG00000158104	HPD	10322	5	4	1.08787	0.00676781
chr12	122471796	122471852	3	57	hyper	ENSG00000110987	BCL7A	14496	5	5	-1.28267	0.000117878
chr12	122529244	122529325	3	82	hyper	ENSG00000175727	MLXIP	12656	5	5	-1.46956	1.25274e-12
chr12	122709827	122709858	3	32	hyper	ENSG00000256861	RP11-512M8.5	17516	1	1	-0.642232	NA
chr12	123205661	123205742	5	82	hypo	ENSG00000196917	HCAR1	100877	5	3	-1.39112	0.00110173
chr12	123344641	123344751	6	111	hypo	ENSG00000130787	HIP1R	24723	7	7	0.390691	0.334592
chr12	123373948	123373997	4	50	hypo	ENSG00000139722	VPS37B	24090	3	3	-0.61517	0.00109697
chr12	123874040	123874098	9	59	hyper	ENSG00000183955	SETD8	5749	7	7	-0.166838	0.406276
chr12	123971635	123971829	4	195	hypo	ENSG00000188026	RILPL1	15807	5	7	-2.57187	6.30969e-11
chr12	124251746	124251844	3	99	hyper	ENSG00000197653	DNAH10	4753	7	7	0.387498	0.6166
chr12	124817913	124817943	3	31	hyper	ENSG00000196498	NCOR2	234081	6	6	0.361452	0.134267
chr12	124959931	124960125	4	195	hypo	ENSG00000196498	NCOR2	128889	6	6	0.361452	0.134267
chr12	125030049	125030131	5	83	hyper	ENSG00000196498	NCOR2	198951	3	3	0.361452	0.134267
chr12	125094113	125094228	4	116	hypo	ENSG00000196498	NCOR2	42159	5	5	0.361452	0.134267
chr12	125101198	125101264	3	67	hyper	ENSG00000196498	NCOR2	49220	3	3	0.361452	0.134267
chr12	125137761	125137796	5	36	hypo	ENSG00000196498	NCOR2	85767	5	5	0.361452	0.134267
chr12	125251184	125251208	3	25	hypo	ENSG00000073060	SCARB1	97266	5	5	-1.94835	3.39803e-08
chr12	126582268	126582471	3	204	hyper	ENSG00000139364	TMEM132B	771207	7	7	0.61037	0.407803
chr12	127631022	127631055	4	34	hyper	ENSG00000181234	TMEM132C	1120908	2	1	-1.19657	NA
chr12	127900564	127900673	3	110	hypo	ENSG00000181234	TMEM132C	851328	7	7	-1.19657	NA
chr12	128257863	128258359	8	497	hypo	ENSG00000181234	TMEM132C	493835	7	7	-1.19657	NA
chr12	131575945	131576217	9	273	hypo	ENSG00000111452	GPR133	137629	5	4	4.27613	1.08733e-11
chr12	132078071	132078160	3	90	hypo	ENSG00000061936	SFSWAP	117517	4	5	-0.364418	0.025681
chr12	132455768	132456206	3	439	hyper	ENSG00000183495	EP400	21479	5	5	0.170196	0.484344
chr12	132509283	132509321	3	39	hyper	ENSG00000183495	EP400	74794	6	6	0.170196	0.484344
chr12	132966263	132966349	6	87	hypo	ENSG00000182870	GALNT9	60516	7	7	1.02772	0.587327
chr12	133069284	133069456	7	173	hypo	ENSG00000112787	FBRSL1	3233	3	3	-0.111266	0.669841
chr12	133113839	133113950	5	112	hypo	ENSG00000112787	FBRSL1	47757	6	6	-0.111266	0.669841
chr12	133534287	133534312	3	26	hyper	ENSG00000196458	ZNF605	1406	7	7	0.0401742	0.921381
chr12	133537452	133537510	3	59	hyper	ENSG00000196458	ZNF605	4588	7	7	0.0401742	0.921381
chr13	20241023	20241039	3	17	hypo	ENSG00000196199	MPHOSPH8	33243	6	6	0.035034	0.878718
chr13	21348453	21348461	3	9	hypo	ENSG00000150456	N6AMT2	368	7	7	-0.828303	0.000977761
chr13	22694771	22695056	7	286	hypo	ENSG00000102678	FGF9	449391	5	4	1.01901	0.224051
chr13	24166788	24166978	5	191	hyper	ENSG00000127863	TNFRSF19	22374	7	7	-0.0178066	0.984897
chr13	25223172	25223214	3	43	hyper	ENSG00000075673	ATP12A	31354	7	7	2.37656	0.125424
chr13	25416900	25416995	4	96	hypo	ENSG00000132972	RNF17	78657	7	7	5.33269	7.92638e-24
chr13	25523604	25523660	3	57	hypo	ENSG00000151849	CENPJ	26613	7	7	0.4396	0.0840176
chr13	25569560	25569664	5	105	hypo	ENSG00000269099	LSP1	21927	7	7	1.42929	0.259968
chr13	25577678	25577890	4	213	hypo	ENSG00000269099	LSP1	13755	7	7	1.42929	0.259968
chr13	25746082	25746126	5	45	hypo	ENSG00000165566	AMER2	10282	7	2	-0.111976	0.909558
chr13	26586290	26586353	5	64	hypo	ENSG00000132932	ATP8A2	640112	7	7	3.04174	0.0776846
chr13	26885420	26885585	4	166	hypo	ENSG00000132964	CDK8	57226	7	5	0.262817	0.261782
chr13	27610576	27610741	3	166	hypo	ENSG00000152484	USP12	135374	7	5	2.31915	2.01223e-16
chr13	27703216	27703413	3	198	hypo	ENSG00000152484	USP12	63021	4	4	2.31915	2.01223e-16
chr13	27705445	27705648	4	204	hypo	ENSG00000152484	USP12	65253	5	3	2.31915	2.01223e-16
chr13	28579742	28579894	3	153	hypo	ENSG00000122025	FLT3	2407	7	4	4.08197	2.24896e-33
chr13	28588589	28588650	3	62	hyper	ENSG00000122025	FLT3	11208	5	4	4.08197	2.24896e-33
chr13	28589975	28590733	6	759	hypo	ENSG00000122025	FLT3	12943	7	4	4.08197	2.24896e-33
chr13	28609038	28609651	6	614	hypo	ENSG00000122025	FLT3	31933	4	4	4.08197	2.24896e-33
chr13	28615805	28615908	3	104	hypo	ENSG00000122025	FLT3	38445	4	3	4.08197	2.24896e-33
chr13	30689564	30689605	4	42	hyper	ENSG00000102781	KATNAL1	192036	2	3	0.872419	0.00186254
chr13	31686963	31687235	3	273	hypo	ENSG00000120694	HSPH1	49425	7	5	-0.229135	0.252455
chr13	32472465	32472808	3	344	hypo	ENSG00000073910	FRY	132799	7	6	1.0444	0.0016536
chr13	32695333	32695607	3	275	hypo	ENSG00000073910	FRY	90033	7	7	1.0444	0.0016536
chr13	33003425	33003760	7	336	hypo	ENSG00000139597	N4BP2L1	1276	3	3	4.31796	1.62303e-27
chr13	33357130	33357879	7	750	hyper	ENSG00000083642	PDS5B	196940	5	5	1.5967	1.30332e-12
chr13	33591636	33591707	3	72	hyper	ENSG00000133116	KL	1464	7	2	0.234141	0.826048
chr13	37394390	37394639	4	250	hypo	ENSG00000133111	RFXAP	1153	1	1	-1.7493	1.2646e-08
chr13	37426104	37426180	3	77	hypo	ENSG00000120693	SMAD9	7174	7	7	-2.69832	3.6828e-13
chr13	37426487	37426667	3	181	hypo	ENSG00000120693	SMAD9	7609	5	5	-2.69832	3.6828e-13
chr13	39262409	39262447	3	39	hyper	ENSG00000150893	FREM2	1162	7	7	1.04636	NA
chr13	40600338	40600585	5	248	hypo	ENSG00000133103	COG6	370697	7	4	-0.825111	0.000449503
chr13	41148152	41148449	4	298	hypo	ENSG00000150907	FOXO1	18496	2	5	3.26687	1.4384e-73
chr13	41193536	41193626	4	91	hypo	ENSG00000150907	FOXO1	63777	7	4	3.26687	1.4384e-73
chr13	41363042	41363082	3	41	hyper	ENSG00000102743	SLC25A15	569	2	4	-1.3123	0.00129094
chr13	41837188	41837284	3	97	hyper	ENSG00000120662	MTRF1	46022	1	1	-0.179833	0.401418
chr13	42075693	42075736	3	44	hyper	ENSG00000102760	RGCC	44019	5	7	0.0436553	0.953121
chr13	46195891	46196087	5	197	hypo	ENSG00000165837	FAM194B	6114	7	7	0.919312	0.210698
chr13	46944143	46944302	3	160	hypo	ENSG00000102445	KIAA0226L	27120	4	3	0.766957	0.333717
chr13	46954445	46954637	3	193	hypo	ENSG00000102445	KIAA0226L	37439	4	3	0.766957	0.333717
chr13	49147423	49147573	5	151	hyper	ENSG00000136161	RCBTB2	40128	3	4	-2.29359	1.29185e-08
chr13	49224156	49224424	4	269	hyper	ENSG00000152207	CYSLTR2	56659	5	4	4.29548	5.09978e-23
chr13	49644786	49644975	4	190	hyper	ENSG00000102531	FNDC3A	94832	5	5	1.05273	1.46532e-05
chr13	50069148	50069194	3	47	hyper	ENSG00000136147	PHF11	924	1	3	1.07401	0.00138327
chr13	50108590	50108649	4	60	hypo	ENSG00000136144	RCBTB1	2529	4	7	-0.254608	0.424623
chr13	50702981	50703057	5	77	hypo	ENSG00000176124	DLEU1	46712	7	1	-0.142258	0.719439
chr13	50767105	50767322	3	218	hyper	ENSG00000176124	DLEU1	110906	7	7	-0.142258	0.719439
chr13	51074443	51074864	3	422	hyper	ENSG00000186047	DLEU7	343421	7	7	0.772335	0.0961244
chr13	51563613	51563785	5	173	hyper	ENSG00000136104	RNASEH2B	79885	7	7	0.122505	0.674151
chr13	51707314	51707463	3	150	hyper	ENSG00000150510	FAM124A	89113	2	2	2.26116	0.00545728
chr13	53007972	53008176	3	205	hyper	ENSG00000136100	VPS36	21337	6	6	-0.173808	0.47492
chr13	53153370	53153680	4	311	hyper	ENSG00000139675	HNRNPA1L2	38078	7	7	-0.593273	0.0141047
chr13	53775795	53775843	6	49	hyper	ENSG00000102837	OLFM4	172925	7	7	-1.14263	0.584377
chr13	57720442	57720481	5	40	hyper	ENSG00000204918	PRR20B	1159	7	7	NA	NA
chr13	64651269	64651310	4	42	hypo	ENSG00000226974	AL445989.1	330355	7	7	NA	NA
chr13	71403653	71403992	4	340	hypo	ENSG00000150361	KLHL1	721230	7	7	NA	NA
chr13	71814225	71814454	3	230	hypo	ENSG00000165659	DACH1	626990	7	4	0.618381	0.137284
chr13	76591337	76591377	3	41	hyper	ENSG00000178734	C13orf45	146170	5	5	-0.878552	NA
chr13	78514687	78515028	4	342	hyper	ENSG00000136160	EDNRB	20953	7	7	2.87453	0.0708924
chr13	79395820	79396034	3	215	hyper	ENSG00000152193	RNF219	162612	7	7	-0.0438619	0.871083
chr13	85915448	85915468	3	21	hyper	ENSG00000184564	SLITRK6	458164	7	7	NA	NA
chr13	92810563	92810847	3	285	hyper	ENSG00000179399	GPC5	759776	5	5	4.14932	9.39599e-30
chr13	99382198	99382224	3	27	hypo	ENSG00000088386	SLC15A1	46156	7	7	-0.308512	0.463467
chr13	99854047	99854053	3	7	hyper	ENSG00000134882	UBAC2	1022	1	1	-0.356483	0.103795
chr13	100047899	100048178	8	280	hypo	ENSG00000169508	GPR183	88378	7	4	2.67426	2.38693e-37
chr13	100227470	100227587	3	118	hyper	ENSG00000125246	CLYBL	31389	7	7	-2.37449	8.18011e-13
chr13	100766601	100766715	3	115	hypo	ENSG00000175198	PCCA	25389	7	7	-1.28868	5.62241e-07
chr13	101133082	101133214	5	133	hypo	ENSG00000175198	PCCA	391879	5	7	-1.28868	5.62241e-07
chr13	101198099	101198166	3	68	hyper	ENSG00000134864	GGACT	13383	5	5	-0.141092	0.750887
chr13	101719743	101720095	3	353	hyper	ENSG00000102452	NALCN	348864	7	7	0.643919	0.268347
chr13	107025840	107025900	3	61	hyper	ENSG00000125266	EFNB2	161591	7	7	3.4681	2.72968e-10
chr13	107214273	107214359	4	87	hypo	ENSG00000134884	ARGLU1	20295	4	3	0.525451	0.00336818
chr13	110135908	110136021	3	114	hyper	ENSG00000185950	IRS2	302950	7	7	2.06311	2.08178e-15
chr13	110251454	110251611	3	158	hyper	ENSG00000185950	IRS2	187382	7	7	2.06311	2.08178e-15
chr13	111131018	111131200	4	183	hypo	ENSG00000139832	RAB20	82970	5	4	1.7524	6.09399e-06
chr13	111718984	111719025	4	42	hyper	ENSG00000102606	ARHGEF7	47960	7	7	0.34704	0.0452845
chr13	112627983	112628082	5	100	hyper	ENSG00000182968	SOX1	93879	7	7	1.87609	NA
chr13	112985016	112985077	8	62	hypo	ENSG00000153498	SPACA7	45585	7	7	0.203463	0.781258
chr13	113572626	113572902	8	277	hypo	ENSG00000126217	MCF2L	24072	7	5	-2.12306	0.000208291
chr13	114052885	114052933	4	49	hyper	ENSG00000139835	GRTP1	34467	7	7	2.59391	2.39527e-12
chr13	114150408	114150490	4	83	hypo	ENSG00000150403	TMCO3	5139	6	6	0.195617	0.535919
chr13	114565715	114565781	3	67	hypo	ENSG00000183087	GAS6	42224	3	3	0.330762	0.0834251
chr14	19889560	19889577	3	18	hyper	ENSG00000187537	POTEM	130703	7	7	1.00258	NA
chr14	21675144	21675474	3	331	hypo	ENSG00000169327	OR5AU1	51086	6	3	4.74293	6.38675e-20
chr14	21684165	21684246	3	82	hyper	ENSG00000092199	HNRNPC	6910	6	5	0.316085	0.0637185
chr14	21820676	21820878	3	203	hyper	ENSG00000092201	SUPT16H	1146	7	7	0.473331	0.0223494
chr14	22458926	22459103	3	178	hypo	ENSG00000211796	TRAV16	279	7	7	1.12425	NA
chr14	22855789	22855845	4	57	hypo	ENSG00000211821	TRDV2	35543	7	7	1.867	0.0151248
chr14	23588055	23588171	7	117	hyper	ENSG00000092067	CEBPE	1600	4	5	-1.64593	0.00147215
chr14	23835708	23835733	4	26	hypo	ENSG00000100842	EFS	758	7	7	4.2744	0.0536804
chr14	23955512	23955865	4	354	hyper	ENSG00000129460	NGDN	16791	6	6	-0.0848238	0.735754
chr14	23999927	23999961	3	35	hypo	ENSG00000259431	THTPA	25270	4	5	-0.40012	0.202653
chr14	24300450	24300623	3	174	hyper	ENSG00000197775	DHRS4-AS1	107402	5	7	NA	NA
chr14	31108302	31108366	3	65	hyper	ENSG00000092108	SCFD1	17016	5	4	0.161162	0.351167
chr14	31435838	31436046	6	209	hyper	ENSG00000196792	STRN3	72937	7	7	1.24272	6.63951e-06
chr14	31560390	31560668	4	279	hyper	ENSG00000100478	AP4S1	66217	4	3	0.365641	0.147893
chr14	31926504	31926542	7	39	hyper	ENSG00000129480	DTD2	11281	1	1	-0.531623	0.00950023
chr14	34234353	34234747	5	395	hyper	ENSG00000151322	NPAS3	830411	7	7	0.080878	0.926535
chr14	34270407	34270437	5	31	hypo	ENSG00000129521	EGLN3	421660	7	7	-0.252173	0.593633
chr14	34441446	34441488	3	43	hypo	ENSG00000129521	EGLN3	43162	5	5	-0.252173	0.593633
chr14	34793379	34793710	3	332	hyper	ENSG00000129521	EGLN3	101460	7	7	-0.252173	0.593633
chr14	35489629	35489664	3	36	hypo	ENSG00000100883	SRP54	38483	6	7	0.821451	0.000205976
chr14	35760178	35760258	3	81	hyper	ENSG00000100902	PSMA6	12379	4	4	0.212107	0.427737
chr14	35819239	35819412	3	174	hypo	ENSG00000100906	NFKBIA	54626	4	5	3.14787	5.63548e-30
chr14	35882877	35882928	3	52	hypo	ENSG00000100906	NFKBIA	8949	7	7	3.14787	5.63548e-30
chr14	36287624	36287742	3	119	hyper	ENSG00000100916	BRMS1L	7839	7	7	1.35752	1.78285e-08
chr14	36294597	36294649	5	53	hypo	ENSG00000100916	BRMS1L	899	7	7	1.35752	1.78285e-08
chr14	39829179	39829374	3	196	hypo	ENSG00000165355	FBXO33	72427	7	7	0.319332	0.237456
chr14	45267799	45267843	9	45	hypo	ENSG00000179476	C14orf28	98675	7	7	2.27841e-05	1
chr14	45691726	45691976	3	251	hypo	ENSG00000129534	MIS18BP1	19458	3	1	0.754829	0.0178764
chr14	50459795	50460321	7	527	hypo	ENSG00000214900	C14orf182	11628	7	4	1.93485	1.03413e-07
chr14	50506587	50506772	4	186	hyper	ENSG00000214900	C14orf182	32440	4	3	1.93485	1.03413e-07
chr14	51137167	51137270	3	104	hypo	ENSG00000151748	SAV1	2168	5	5	1.26066	2.02417e-05
chr14	51328904	51329114	4	211	hypo	ENSG00000131969	ABHD12B	9867	7	7	0.0137235	0.982279
chr14	52242933	52243073	5	141	hyper	ENSG00000186469	GNG2	49908	7	7	2.23967	2.86598e-05
chr14	52445673	52445828	3	156	hyper	ENSG00000267802	AL358333.1	9502	7	4	NA	NA
chr14	52510511	52510596	3	86	hypo	ENSG00000087303	NID2	39032	7	7	1.81916	8.81737e-07
chr14	53474193	53474327	3	135	hypo	ENSG00000073712	FERMT2	55106	5	4	6.9524	1.51845e-25
chr14	54683705	54683845	3	141	hypo	ENSG00000100526	CDKN3	179896	7	7	0.465447	0.18114
chr14	54687539	54687683	3	145	hyper	ENSG00000100526	CDKN3	176060	7	7	0.465447	0.18114
chr14	55036376	55036470	3	95	hyper	ENSG00000020577	SAMD4A	2608	7	7	-0.244402	0.68498
chr14	55732034	55732181	4	148	hypo	ENSG00000178974	FBXO34	5912	7	7	0.339846	0.12725
chr14	56046028	56046182	5	155	hyper	ENSG00000126777	KTN1	20315	1	1	-0.704414	0.00237455
chr14	57781301	57781369	5	69	hyper	ENSG00000070367	EXOC5	45608	7	7	0.729775	0.00869161
chr14	59027109	59027303	3	195	hyper	ENSG00000165617	DACT1	73578	7	7	-2.46062	0.00374868
chr14	59847449	59847589	3	141	hyper	ENSG00000181619	GPR135	84540	5	7	-0.897782	0.00707345
chr14	61549347	61549447	3	101	hyper	ENSG00000139974	SLC38A6	101565	6	6	-2.70899	1.7208e-12
chr14	61578052	61578144	11	93	hypo	ENSG00000027075	PRKCH	76177	4	4	1.88412	2.99222e-09
chr14	61657312	61657492	6	181	hypo	ENSG00000027075	PRKCH	3125	7	4	1.88412	2.99222e-09
chr14	62016363	62016576	3	214	hypo	ENSG00000258989	RP11-47I22.4	20623	4	4	NA	NA
chr14	62361376	62361531	3	156	hypo	ENSG00000139973	SYT16	92348	7	7	1.00258	NA
chr14	63178366	63178634	3	269	hypo	ENSG00000140015	KCNH5	390254	7	7	0.316079	0.68179
chr14	64340403	64340558	3	156	hypo	ENSG00000054654	SYNE2	20797	7	7	1.75103	1.61039e-12
chr14	65432125	65432243	4	119	hyper	ENSG00000139998	RAB15	17063	7	5	-3.58613	3.25311e-09
chr14	65918612	65918757	3	146	hyper	ENSG00000033170	FUT8	41374	7	7	-0.578825	0.0129788
chr14	68036213	68036344	4	132	hyper	ENSG00000054690	PLEKHH1	36260	7	7	-1.75035	7.51763e-07
chr14	69065237	69065301	3	65	hypo	ENSG00000182185	RAD51B	778773	3	3	0.129532	0.719284
chr14	69090037	69090108	3	72	hypo	ENSG00000185650	ZFP36L1	173117	7	7	0.270683	0.262769
chr14	69535979	69536438	4	460	hypo	ENSG00000139990	DCAF5	18610	6	6	0.0755578	0.728681
chr14	69926908	69926938	3	31	hyper	ENSG00000029364	SLC39A9	61516	6	6	0.392699	0.0280044
chr14	70479199	70479446	3	248	hypo	ENSG00000198732	SMOC1	133189	5	4	-0.0274721	0.96472
chr14	70826989	70827109	3	121	hyper	ENSG00000133983	COX16	600	7	7	-1.00501	2.00845e-06
chr14	71720842	71720927	3	86	hypo	ENSG00000267901	AC004817.1	37421	7	7	NA	NA
chr14	72887965	72888008	4	44	hyper	ENSG00000182732	RGS6	488830	7	7	5.26455	7.67396e-10
chr14	73181264	73181294	4	31	hypo	ENSG00000205683	DPF3	52695	7	5	-1.88943	0.0121588
chr14	73893914	73894039	5	126	hyper	ENSG00000133961	NUMB	152161	4	4	0.37424	0.193187
chr14	74058427	74058434	3	8	hypo	ENSG00000177465	ACOT4	20	2	1	1.15984	0.00339637
chr14	75954857	75954897	3	41	hyper	ENSG00000156127	BATF	33889	7	7	0.879293	0.0718241
chr14	76006192	76006734	12	543	hypo	ENSG00000156127	BATF	17695	5	3	0.879293	0.0718241
chr14	76015502	76015818	4	317	hypo	ENSG00000156127	BATF	26892	4	4	0.879293	0.0718241
chr14	76017632	76018064	7	433	hypo	ENSG00000119686	FLVCR2	27110	7	4	-1.20085	1.59368e-10
chr14	76120593	76120656	3	64	hypo	ENSG00000133935	C14orf1	4490	6	6	0.873187	0.00169754
chr14	76734564	76734651	5	88	hyper	ENSG00000119715	ESRRB	42348	7	7	-0.709558	0.17388
chr14	76948653	76948822	3	170	hyper	ENSG00000119715	ESRRB	171780	7	7	-0.709558	0.17388
chr14	77193440	77193492	4	53	hyper	ENSG00000071246	VASH1	35064	4	5	-2.29284	7.50904e-10
chr14	77371925	77372101	4	177	hyper	ENSG00000100565	C14orf166B	79298	7	4	0.410686	NA
chr14	77453210	77453453	5	244	hypo	ENSG00000119669	IRF2BPL	41702	7	7	-2.08356	1.35755e-08
chr14	77461784	77461948	3	165	hypo	ENSG00000119669	IRF2BPL	33167	5	5	-2.08356	1.35755e-08
chr14	77716664	77716760	3	97	hypo	ENSG00000165553	NGB	20942	7	7	-0.676494	NA
chr14	78093481	78093559	3	79	hyper	ENSG00000100596	SPTLC2	10403	7	7	-0.398622	0.0677862
chr14	79478040	79478117	3	78	hypo	ENSG00000021645	NRXN3	769344	7	7	-4.17069	NA
chr14	81889057	81889125	4	69	hypo	ENSG00000140022	STON2	26629	7	7	0.945744	0.00650381
chr14	82000809	82000882	4	74	hyper	ENSG00000071537	SEL1L	639	4	4	-0.181614	0.606091
chr14	88541834	88542168	3	335	hypo	ENSG00000140030	GPR65	70533	5	5	-0.952064	0.00212478
chr14	89259748	89259778	3	31	hyper	ENSG00000165521	EML5	666	2	2	-0.611106	0.00152983
chr14	89749955	89749997	3	43	hypo	ENSG00000053254	FOXN3	121270	4	4	0.200547	0.560126
chr14	89983655	89983900	6	246	hyper	ENSG00000053254	FOXN3	355071	6	7	0.200547	0.560126
chr14	90203259	90203539	4	281	hypo	ENSG00000258792	RP11-944C7.1	105488	7	7	-0.0228651	0.981052
chr14	90742366	90742555	8	190	hypo	ENSG00000100764	PSMC1	19621	4	4	0.182728	0.511206
chr14	90950665	90950804	3	140	hyper	ENSG00000198668	CALM1	87888	7	7	-0.410512	0.164339
chr14	91254827	91254868	3	42	hyper	ENSG00000165914	TTC7B	43585	3	3	-0.193234	0.448246
chr14	91379869	91379974	3	106	hypo	ENSG00000100784	RPS6KA5	12902	7	7	1.6666	0.00376721
chr14	92283665	92283732	3	68	hypo	ENSG00000165929	TC2N	37603	7	4	3.16526	7.02598e-11
chr14	92309939	92310024	3	86	hypo	ENSG00000165929	TC2N	63886	7	4	3.16526	7.02598e-11
chr14	92569928	92570265	5	338	hypo	ENSG00000066427	ATXN3	45200	3	5	-0.351472	0.207174
chr14	92991589	92991813	5	225	hyper	ENSG00000100599	RIN3	11583	4	5	-0.87916	0.0108794
chr14	93337917	93338140	3	224	hypo	ENSG00000100604	CHGA	51395	7	7	-0.28635	0.850175
chr14	93977031	93977540	7	510	hypo	ENSG00000133958	UNC79	177720	7	4	0.686007	0.0921846
chr14	94467722	94467817	6	96	hyper	ENSG00000100628	ASB2	24631	7	7	1.55056	0.00722054
chr14	94494873	94494934	3	62	hyper	ENSG00000089723	OTUB2	2228	5	5	-1.12502	0.000140417
chr14	95662391	95662540	4	150	hypo	ENSG00000165959	CLMN	14188	7	7	1.66887	3.97759e-07
chr14	95956067	95956325	4	259	hyper	ENSG00000176438	SYNE3	14022	5	5	-0.356868	0.204082
chr14	95982155	95982226	3	72	hypo	ENSG00000258572	RP11-1070N10.3	281	1	3	-0.543691	0.547042
chr14	97527858	97527936	3	79	hyper	ENSG00000100749	VRK1	264256	7	7	0.134461	0.563123
chr14	97684742	97684839	4	98	hyper	ENSG00000100749	VRK1	421149	7	7	0.134461	0.563123
chr14	99130841	99130907	3	67	hypo	ENSG00000176605	C14orf177	47074	7	7	NA	NA
chr14	99541066	99541100	3	35	hyper	ENSG00000127152	BCL11B	196777	5	7	0.453777	0.15314
chr14	100011625	100011683	3	59	hypo	ENSG00000205476	CCDC85C	34051	7	5	2.2262	2.10274e-15
chr14	100052245	100052475	3	231	hypo	ENSG00000205476	CCDC85C	74757	7	7	2.2262	2.10274e-15
chr14	100062480	100062527	3	48	hypo	ENSG00000205476	CCDC85C	84900	7	5	2.2262	2.10274e-15
chr14	100750981	100751104	4	124	hypo	ENSG00000197119	SLC25A29	21841	7	7	-1.33797	1.75653e-06
chr14	101908984	101909082	8	99	hypo	ENSG00000197406	DIO3	118653	7	7	NA	NA
chr14	102302575	102302771	8	197	hypo	ENSG00000078304	PPP2R5C	74538	5	3	0.611422	0.00289792
chr14	102452028	102452190	3	163	hyper	ENSG00000197102	DYNC1H1	21244	5	5	0.369177	0.123981
chr14	103219138	103219288	3	151	hypo	ENSG00000131323	TRAF3	24598	6	6	0.231112	0.350943
chr14	103230438	103230872	8	435	hypo	ENSG00000131323	TRAF3	13156	4	5	0.231112	0.350943
chr14	103461132	103461290	3	159	hyper	ENSG00000198752	CDC42BPB	62495	6	6	0.161841	0.586482
chr14	103606793	103607208	5	416	hypo	ENSG00000185215	TNFAIP2	17202	7	3	4.82747	6.09485e-40
chr14	103741004	103741026	3	23	hypo	ENSG00000100664	EIF5	59322	7	7	1.30481	1.4633e-12
chr14	103826095	103826101	3	7	hyper	ENSG00000075413	MARK3	25629	7	7	0.143686	0.381954
chr14	103929627	103929737	3	111	hypo	ENSG00000075413	MARK3	77953	5	5	0.143686	0.381954
chr14	104387096	104387106	4	11	hyper	ENSG00000156411	C14orf2	8474	1	1	-0.948309	2.86029e-06
chr14	104388286	104388308	3	23	hyper	ENSG00000156411	C14orf2	9670	7	7	-0.948309	2.86029e-06
chr14	104447036	104447116	5	81	hyper	ENSG00000156414	TDRD9	52277	7	7	0.84902	0.0448203
chr14	104468780	104468854	3	75	hypo	ENSG00000156414	TDRD9	74018	7	7	0.84902	0.0448203
chr14	104833149	104833539	4	391	hyper	ENSG00000228032	C14orf144	122803	7	7	-0.613929	0.683886
chr14	105030989	105031037	4	49	hyper	ENSG00000184601	C14orf180	15006	7	7	NA	NA
chr14	105044484	105044596	5	113	hyper	ENSG00000184601	C14orf180	1479	7	7	NA	NA
chr14	105126916	105126993	4	78	hypo	ENSG00000203485	INF2	28987	4	5	0.201343	0.579647
chr14	105532918	105533022	5	105	hypo	ENSG00000183484	GPR132	1187	4	3	2.90211	8.06064e-26
chr14	105792485	105792552	6	68	hyper	ENSG00000179364	PACS2	25618	5	5	-1.75696	1.06341e-10
chr14	105924658	105924791	4	134	hyper	ENSG00000182979	MTA1	38565	7	5	-0.389922	0.02024
chr14	106790503	106790623	4	121	hypo	ENSG00000211953	IGHV3-30	972	7	7	0.731184	0.754246
chr15	22682670	22682702	5	33	hypo	ENSG00000197414	GOLGA6L1	53558	7	7	-0.103515	0.961626
chr15	23217241	23217279	3	39	hyper	ENSG00000153666	GOLGA8I	37980	7	7	0.500097	0.224555
chr15	27847178	27847404	3	227	hyper	ENSG00000104044	OCA2	497212	7	7	-5.0459	0.0494673
chr15	28753796	28753833	6	38	hyper	ENSG00000183629	GOLGA8G	24328	7	7	-1.13971	0.194171
chr15	29114049	29114104	3	56	hyper	ENSG00000034053	APBA2	15551	7	7	2.01427	8.85118e-16
chr15	29959979	29960071	3	93	hyper	ENSG00000104059	FAM189A1	97097	7	7	4.96918	0.0581004
chr15	30149568	30149680	3	113	hyper	ENSG00000104067	TJP1	90981	7	7	1.81224	1.07373e-11
chr15	30468361	30468380	4	20	hypo	ENSG00000261247	GOLGA8T	41018	7	7	4.90067	0.00097126
chr15	31150806	31151020	3	215	hypo	ENSG00000198690	FAN1	45140	7	7	0.156422	0.613354
chr15	31591082	31591177	3	96	hypo	ENSG00000169926	KLF13	27927	7	7	0.730078	0.00342347
chr15	31660428	31660450	3	23	hypo	ENSG00000169926	KLF13	41381	5	3	0.730078	0.00342347
chr15	31735299	31735541	3	243	hypo	ENSG00000169926	KLF13	116362	7	4	0.730078	0.00342347
chr15	33351627	33351702	3	76	hypo	ENSG00000248905	FMN1	135232	5	3	0.327195	0.651083
chr15	33382502	33382822	3	321	hyper	ENSG00000248905	FMN1	104234	3	5	0.327195	0.651083
chr15	38945235	38945488	6	254	hypo	ENSG00000175779	C15orf53	43436	7	7	2.77761	NA
chr15	40082168	40082292	3	125	hyper	ENSG00000150667	FSIP1	7198	7	7	-0.480359	0.648563
chr15	41055397	41055418	3	22	hyper	ENSG00000137880	GCHFR	809	3	3	-2.69608	7.97985e-14
chr15	41371688	41371717	3	30	hypo	ENSG00000128908	INO80	100624	6	6	0.640267	0.000969431
chr15	41468313	41468447	4	135	hypo	ENSG00000178997	EXD1	54560	7	7	-0.0821627	0.873903
chr15	42034889	42035255	3	367	hyper	ENSG00000137802	MAPKBP1	31558	6	6	1.22759	0.000368693
chr15	42267275	42267483	3	209	hypo	ENSG00000103966	EHD4	2602	7	7	0.431895	0.0351821
chr15	42637056	42637186	5	131	hyper	ENSG00000092529	CAPN3	3178	6	6	-1.16465	1.59223e-05
chr15	42842430	42842457	3	28	hyper	ENSG00000137814	HAUS2	1435	3	3	0.594835	0.000646113
chr15	44534694	44534710	3	17	hypo	ENSG00000166734	CASC4	46223	7	7	1.45684	4.07369e-10
chr15	45353763	45353861	3	99	hyper	ENSG00000140263	SORD	38510	7	7	-2.52488	1.92127e-16
chr15	47656745	47656942	5	198	hyper	ENSG00000137872	SEMA6D	180545	7	7	-0.503774	0.447681
chr15	49087113	49087365	3	253	hypo	ENSG00000103995	CEP152	22527	3	3	0.274147	0.375945
chr15	49714372	49714382	4	11	hyper	ENSG00000166262	FAM227B	93789	7	7	-0.0586448	0.902917
chr15	51698498	51698524	4	27	hypo	ENSG00000186417	GLDN	64685	5	5	-0.482713	0.544319
chr15	52043025	52043076	3	52	hypo	ENSG00000140280	LYSMD2	27784	7	1	2.50016	6.50218e-13
chr15	55726752	55726758	3	7	hyper	ENSG00000256061	DYX1C1	16797	7	7	0.509496	0.186324
chr15	55881225	55881246	3	22	hyper	ENSG00000171016	PYGO1	89	7	2	0.590001	0.185745
chr15	56912118	56912541	3	424	hyper	ENSG00000138587	MNS1	154993	5	5	-0.815332	0.177011
chr15	57205432	57205478	3	47	hyper	ENSG00000137871	ZNF280D	260446	7	7	0.0459837	0.896759
chr15	58250663	58250780	3	118	hypo	ENSG00000103569	AQP9	179645	7	5	4.73752	9.42477e-13
chr15	58856155	58856221	3	67	hyper	ENSG00000166035	LIPC	153420	7	7	0.253362	0.696957
chr15	59060685	59060706	5	22	hyper	ENSG00000128923	FAM63B	2694	7	7	0.786444	0.0121588
chr15	59334420	59334604	5	185	hyper	ENSG00000157456	CCNB2	62763	6	6	0.0909097	0.759566
chr15	59451398	59451440	4	43	hypo	ENSG00000157483	MYO1E	24306	5	6	0.680288	0.150083
chr15	61328268	61328580	7	313	hyper	ENSG00000069667	RORA	547941	7	7	1.69459	1.77432e-08
chr15	65783080	65783223	3	144	hypo	ENSG00000074603	DPP8	44192	6	6	0.184506	0.571132
chr15	66149134	66149283	3	150	hyper	ENSG00000103769	RAB11A	12584	7	7	0.422573	0.00978361
chr15	66209558	66209615	3	58	hypo	ENSG00000157890	MEGF11	22169	6	4	0.289573	0.609834
chr15	66209947	66210017	3	71	hypo	ENSG00000157890	MEGF11	22565	6	4	0.289573	0.609834
chr15	66863509	66863837	3	329	hypo	ENSG00000188501	LCTL	5355	7	4	1.29083	1.24455e-05
chr15	67146102	67146128	4	27	hyper	ENSG00000137834	SMAD6	151549	7	7	1.46143	1.44834e-07
chr15	70435196	70435358	6	163	hypo	ENSG00000140332	TLE3	44761	3	3	0.682014	0.00338714
chr15	72433703	72434086	3	384	hypo	ENSG00000066933	MYO9A	22975	5	4	0.608362	0.0287517
chr15	73689509	73689588	3	80	hyper	ENSG00000138622	HCN4	27942	7	7	-2.21977	NA
chr15	74016676	74016917	3	242	hyper	ENSG00000205363	C15orf59	28291	7	7	1.33099	0.00539386
chr15	74722405	74722641	6	237	hypo	ENSG00000138623	SEMA7A	20893	3	3	2.63827	1.05388e-12
chr15	74940810	74941052	4	243	hypo	ENSG00000179335	CLK3	40218	5	5	0.167639	0.380916
chr15	75118686	75118722	3	37	hyper	ENSG00000213578	CPLX3	182	7	7	NA	NA
chr15	75119277	75119335	3	59	hyper	ENSG00000213578	CPLX3	418	7	7	NA	NA
chr15	75199660	75199810	3	151	hyper	ENSG00000178761	FAM219B	272	3	3	0.420379	0.00382008
chr15	75843574	75843727	4	154	hyper	ENSG00000169410	PTPN9	84188	4	5	-0.262757	0.262899
chr15	76682388	76682654	3	267	hyper	ENSG00000159556	ISL2	53456	7	7	-1.26031	0.00634866
chr15	76842338	76842391	3	54	hypo	ENSG00000159556	ISL2	213299	7	7	-1.26031	0.00634866
chr15	77927395	77927497	6	103	hypo	ENSG00000169783	LINGO1	19271	7	7	2.17242	0.0766111
chr15	78864247	78864553	3	307	hyper	ENSG00000169684	CHRNA5	6538	7	7	0.936894	0.00247903
chr15	79602869	79602938	3	70	hyper	ENSG00000166557	TMED3	499	7	7	-0.959976	0.000335499
chr15	80079818	80079943	3	126	hypo	ENSG00000136371	MTHFS	109510	7	7	4.21728	4.83234e-26
chr15	80216739	80216767	3	29	hyper	ENSG00000257028	C15ORF37	1246	2	1	NA	NA
chr15	80258270	80258717	4	448	hypo	ENSG00000140379	BCL2A1	5262	7	1	6.86744	5.55819e-42
chr15	80282723	80282906	4	184	hypo	ENSG00000140379	BCL2A1	19025	7	4	6.86744	5.55819e-42
chr15	83649689	83650035	5	347	hypo	ENSG00000169612	FAM103A1	5095	5	5	-0.0300563	0.891013
chr15	84748504	84748517	3	14	hypo	ENSG00000259511	UBE2Q2L	92730	7	7	-0.392669	NA
chr15	85113143	85113187	3	45	hyper	ENSG00000176371	ZSCAN2	31050	1	1	0.35098	0.15744
chr15	85131779	85131838	4	60	hypo	ENSG00000176371	ZSCAN2	12407	7	7	0.35098	0.15744
chr15	85191825	85192027	3	203	hyper	ENSG00000177082	WDR73	5927	5	5	0.0170143	0.943452
chr15	85904630	85904673	4	44	hypo	ENSG00000170776	AKAP13	19165	4	4	1.3659	2.70302e-05
chr15	85905110	85905335	3	226	hypo	ENSG00000170776	AKAP13	18594	5	4	1.3659	2.70302e-05
chr15	85909562	85909730	4	169	hypo	ENSG00000170776	AKAP13	14170	5	4	1.3659	2.70302e-05
chr15	88580558	88580724	3	167	hypo	ENSG00000140538	NTRK3	162411	7	7	-2.51752	0.016737
chr15	89269379	89269627	3	249	hyper	ENSG00000157766	ACAN	77169	5	5	1.24657	0.00634338
chr15	89632402	89632427	3	26	hyper	ENSG00000140526	ABHD2	1724	3	3	-1.6868	2.32775e-06
chr15	89954659	89954701	6	43	hyper	ENSG00000140521	POLG	76587	2	2	0.165941	0.415341
chr15	90233311	90233319	3	9	hyper	ENSG00000166821	PEX11A	6833	7	2	-1.09333	0.000170385
chr15	90547592	90547721	4	130	hyper	ENSG00000140548	ZNF710	3032	1	3	-0.464104	0.150637
chr15	91362990	91363050	3	61	hypo	ENSG00000140564	FURIN	48800	3	4	-2.08445	1.35711e-08
chr15	91428341	91428456	4	116	hypo	ENSG00000182511	FES	1473	1	3	-3.73448	2.08762e-16
chr15	92470368	92470452	3	85	hyper	ENSG00000176463	SLCO3A1	73485	7	7	0.431839	0.0077695
chr15	92489857	92490151	7	295	hypo	ENSG00000176463	SLCO3A1	93079	3	3	0.431839	0.0077695
chr15	92497776	92497857	3	82	hypo	ENSG00000176463	SLCO3A1	100891	7	7	0.431839	0.0077695
chr15	92506853	92506995	7	143	hyper	ENSG00000176463	SLCO3A1	109999	7	7	0.431839	0.0077695
chr15	93467574	93467646	4	73	hyper	ENSG00000173575	CHD2	41084	3	3	1.01734	1.9297e-08
chr15	94015290	94015466	4	177	hyper	ENSG00000269360	AC112693.2	266083	7	7	0.235249	0.654412
chr15	94946936	94946992	3	57	hypo	ENSG00000140563	MCTP2	172197	5	5	1.45792	0.00387678
chr15	98691067	98691230	4	164	hyper	ENSG00000140450	ARRDC4	228364	5	7	-0.34287	0.265508
chr15	99446590	99446756	6	167	hypo	ENSG00000140443	IGF1R	254473	5	4	2.50506	6.97131e-15
chr15	99552368	99552384	3	17	hyper	ENSG00000183571	PGPEP1L	1351	7	7	2.10282	NA
chr15	99644855	99644899	4	45	hypo	ENSG00000182253	SYNM	6457	7	7	4.02379	3.30278e-08
chr15	100160263	100160548	4	286	hyper	ENSG00000068305	MEF2A	143035	4	4	0.263145	0.493498
chr15	100262519	100262810	3	292	hyper	ENSG00000214397	DKFZP779J2370	4634	7	7	1.9148	NA
chr15	100452219	100452246	3	28	hyper	ENSG00000259363	CTD-2054N24.2	105004	4	4	0.454806	0.304375
chr15	101368279	101368448	3	170	hypo	ENSG00000184254	ALDH1A3	49554	7	7	-0.00588462	0.992322
chr15	101805443	101805464	3	22	hypo	ENSG00000131871	VIMP	12246	7	4	0.843772	1.34202e-05
chr15	102062355	102062458	4	104	hyper	ENSG00000140479	PCSK6	32218	7	7	2.51147	0.00396613
chr16	285874	285879	3	6	hypo	ENSG00000167930	ITFG3	1331	3	3	-0.0290132	0.943958
chr16	330061	330072	4	12	hyper	ENSG00000242173	ARHGDIG	11340	7	7	0.157488	0.950606
chr16	776258	776392	5	135	hyper	ENSG00000162004	CCDC78	1398	7	7	-1.52061	3.25692e-06
chr16	1080397	1080432	4	36	hypo	ENSG00000162009	SSTR5	42340	7	7	NA	NA
chr16	1200853	1200947	5	95	hyper	ENSG00000196557	CACNA1H	2339	7	7	2.02369	0.0507784
chr16	1273138	1273197	3	60	hypo	ENSG00000116176	TPSG1	1516	7	7	2.10929	0.0325362
chr16	1471536	1471543	3	8	hyper	ENSG00000174109	C16orf91	1595	1	1	-0.476167	0.0911396
chr16	1533250	1533288	3	39	hyper	ENSG00000251692	PTX4	5712	7	7	1.62892	0.524044
chr16	1781444	1781522	3	79	hypo	ENSG00000138834	MAPK8IP3	25299	5	5	0.308651	0.144581
chr16	2070979	2071232	4	254	hypo	ENSG00000065054	SLC9A3R2	4250	7	7	-2.86341	3.38988e-09
chr16	2609871	2609889	3	19	hypo	ENSG00000140992	PDPK1	21915	7	7	1.1242	4.03738e-06
chr16	3080719	3080774	4	56	hyper	ENSG00000162069	CCDC64B	3033	5	5	-0.693939	0.401351
chr16	3157150	3157162	3	13	hyper	ENSG00000122386	ZNF205	5403	2	1	-0.973772	0.00182589
chr16	3602926	3603088	3	163	hyper	ENSG00000167984	NLRC3	13969	2	5	0.516337	0.00942675
chr16	3647390	3647422	3	33	hyper	ENSG00000188827	SLX4	16224	4	5	-1.24521	5.7807e-07
chr16	3709518	3709671	3	154	hypo	ENSG00000126602	TRAP1	1556	3	5	-0.412044	0.0419105
chr16	4021577	4021684	3	108	hypo	ENSG00000162104	ADCY9	8978	4	3	1.0627	0.00538167
chr16	4069228	4069548	5	321	hyper	ENSG00000162104	ADCY9	56736	3	3	1.0627	0.00538167
chr16	4131058	4131282	8	225	hypo	ENSG00000162104	ADCY9	118518	5	4	1.0627	0.00538167
chr16	4165356	4165377	4	22	hyper	ENSG00000162104	ADCY9	152714	3	3	1.0627	0.00538167
chr16	5072598	5072818	5	221	hyper	ENSG00000103174	NAGPA	11226	3	5	-1.81839	4.45784e-11
chr16	9905572	9905892	4	321	hypo	ENSG00000183454	GRIN2A	53356	7	7	2.00166	0.262515
chr16	10691823	10691949	3	127	hyper	ENSG00000213853	EMP2	17330	7	7	1.10165	0.00377987
chr16	10867707	10867723	3	17	hyper	ENSG00000166676	TVP23A	7182	7	5	2.45383	1.65876e-28
chr16	10869174	10869477	12	304	hypo	ENSG00000166676	TVP23A	8792	5	4	2.45383	1.65876e-28
chr16	11254049	11254342	7	294	hypo	ENSG00000038532	CLEC16A	215850	4	3	0.487512	0.00565092
chr16	11277103	11277453	10	351	hypo	ENSG00000175643	RMI2	66226	4	3	-1.11232	0.00656338
chr16	11702061	11702475	10	415	hypo	ENSG00000189067	LITAF	51855	4	3	1.27996	2.03804e-11
chr16	11734845	11735043	3	199	hyper	ENSG00000189067	LITAF	4706	4	3	1.27996	2.03804e-11
chr16	11763923	11763937	4	15	hyper	ENSG00000184602	SNN	1660	3	3	3.16323	5.417e-28
chr16	12135601	12135708	3	108	hyper	ENSG00000048471	SNX29	65060	7	7	-1.24892	4.50442e-05
chr16	12184067	12184133	3	67	hyper	ENSG00000175604	RP11-276H1.3	3497	5	5	-0.754804	0.135159
chr16	12566742	12566930	4	189	hypo	ENSG00000103381	CPPED1	331037	4	5	-1.52708	2.97047e-07
chr16	14145806	14145921	3	116	hypo	ENSG00000186260	MKL2	19313	7	7	-0.172272	0.674834
chr16	15583230	15583401	3	172	hypo	ENSG00000166780	C16orf45	55163	4	4	-0.618485	0.140033
chr16	15591167	15591640	4	474	hypo	ENSG00000166780	C16orf45	63251	7	5	-0.618485	0.140033
chr16	15666026	15666038	3	13	hypo	ENSG00000166780	C16orf45	137880	4	5	-0.618485	0.140033
chr16	16122206	16122224	4	19	hyper	ENSG00000103222	ABCC1	78781	6	6	0.635986	0.0492096
chr16	16131442	16131760	8	319	hypo	ENSG00000103222	ABCC1	88167	6	5	0.635986	0.0492096
chr16	17002014	17002091	4	78	hypo	ENSG00000214967	NPIPA7	529140	7	5	0.365528	0.45589
chr16	17200176	17200242	3	67	hypo	ENSG00000103489	XYLT1	4583	5	4	0.554649	0.215706
chr16	19183285	19183484	4	200	hyper	ENSG00000103528	SYT17	4091	7	7	0.264913	0.488967
chr16	19840830	19840910	3	81	hypo	ENSG00000174628	IQCK	113092	7	7	-0.833299	0.0326211
chr16	20016013	20016284	5	272	hypo	ENSG00000180269	GPR139	69090	7	7	NA	NA
chr16	20913065	20913175	5	111	hyper	ENSG00000102897	LYRM1	1896	1	1	0.558792	0.0260698
chr16	20931216	20931940	8	725	hypo	ENSG00000102897	LYRM1	20354	4	3	0.558792	0.0260698
chr16	20995811	20995884	3	74	hypo	ENSG00000158486	DNAH3	51414	7	5	1.45582	0.000767588
chr16	21642721	21642933	5	213	hyper	ENSG00000197006	METTL9	34284	7	7	-0.0303747	0.932944
chr16	22006460	22006536	4	77	hypo	ENSG00000155714	PDZD9	11306	7	7	-0.270093	0.691496
chr16	24214492	24214547	3	56	hypo	ENSG00000166501	PRKCB	367197	7	7	-0.962484	0.000383432
chr16	24917365	24917459	3	95	hyper	ENSG00000158865	SLC5A11	60250	7	7	-0.540977	0.516798
chr16	24984316	24984345	3	30	hypo	ENSG00000140750	ARHGAP17	4658	6	6	-1.05869	0.000169653
chr16	27296245	27296515	4	271	hypo	ENSG00000245888	CTD-3203P2.2	16854	4	3	0.684492	0.0329429
chr16	28288868	28288958	3	91	hypo	ENSG00000188322	SBK1	14925	7	7	1.3396	4.02274e-07
chr16	28565852	28565941	7	90	hypo	ENSG00000176476	CCDC101	649	3	1	-0.162544	0.615382
chr16	28856729	28856866	5	138	hypo	ENSG00000178952	TUFM	3065	3	3	-0.792372	0.000308701
chr16	29085777	29085823	3	47	hyper	ENSG00000196796	CTB-134H23.2	35877	7	7	-1.37958	NA
chr16	29784666	29784687	3	22	hyper	ENSG00000174992	ZG16	4883	7	7	0.252603	0.744665
chr16	30563391	30563514	5	124	hyper	ENSG00000260869	AC002310.13	17904	4	7	NA	NA
chr16	30819528	30820030	5	503	hyper	ENSG00000102870	ZNF629	21255	7	7	0.125815	0.729014
chr16	31006670	31006860	4	191	hypo	ENSG00000099365	STX1B	6188	4	4	0.274398	0.400233
chr16	31031869	31032063	3	195	hypo	ENSG00000099365	STX1B	10016	7	7	0.274398	0.400233
chr16	31090793	31090901	5	109	hyper	ENSG00000167395	ZNF646	5104	5	5	-0.195439	0.336608
chr16	46760775	46760790	3	16	hyper	ENSG00000140795	MYLK3	19204	7	7	0.539539	0.149388
chr16	47009912	47010083	4	172	hypo	ENSG00000069345	DNAJA2	2297	7	4	0.744355	0.000987767
chr16	47119088	47119313	3	226	hyper	ENSG00000171208	NETO2	7586	6	6	1.27271	0.00232084
chr16	47516009	47516076	3	68	hypo	ENSG00000102893	PHKB	21008	4	3	1.21229	3.29482e-12
chr16	48656126	48656284	4	159	hypo	ENSG00000102921	N4BP1	12084	1	1	0.276665	0.126931
chr16	50117682	50118356	9	675	hypo	ENSG00000155393	HEATR3	18167	5	3	0.569102	0.0218992
chr16	55090476	55090512	3	37	hyper	ENSG00000176842	IRX5	125720	7	7	-2.51963	4.01271e-05
chr16	56922749	56922765	3	17	hypo	ENSG00000070915	SLC12A3	23638	7	7	2.60416	2.88351e-08
chr16	57085823	57086012	5	190	hypo	ENSG00000140848	CPNE2	40530	5	3	0.826538	8.17094e-08
chr16	57125732	57125762	4	31	hyper	ENSG00000140848	CPNE2	700	3	3	0.826538	8.17094e-08
chr16	57190379	57190509	4	131	hyper	ENSG00000172775	FAM192A	29583	6	6	-0.227548	0.197098
chr16	57348975	57349376	3	402	hyper	ENSG00000102934	PLLP	30575	7	5	2.47709	0.000318897
chr16	66358878	66358922	3	45	hypo	ENSG00000179776	CDH5	41631	7	7	-2.13529	9.42241e-05
chr16	66437349	66437573	4	225	hyper	ENSG00000179776	CDH5	36928	7	7	-2.13529	9.42241e-05
chr16	67216895	67217170	3	276	hyper	ENSG00000196123	KIAA0895L	7525	1	3	-1.28235	1.55355e-06
chr16	67250553	67250594	3	42	hyper	ENSG00000237102	AC040160.1	6322	4	4	NA	NA
chr16	67345737	67346128	4	392	hypo	ENSG00000168676	KCTD19	22581	5	4	0.0292333	0.947656
chr16	67425455	67425833	6	379	hyper	ENSG00000159713	TPPP3	1932	7	7	0.234859	NA
chr16	67636675	67636700	3	26	hyper	ENSG00000102974	CTCF	40377	7	7	0.154978	0.463966
chr16	67933262	67933307	4	46	hyper	ENSG00000159792	PSKH1	6109	6	6	-0.59997	0.00114255
chr16	67974284	67974327	3	44	hyper	ENSG00000213398	LCAT	652	5	5	-0.388019	0.0963951
chr16	68087414	68087517	4	104	hyper	ENSG00000167264	DUS2	65816	6	6	-0.993199	3.79646e-05
chr16	68251661	68251756	4	96	hyper	ENSG00000072736	NFATC3	132461	5	3	-0.789883	0.00579963
chr16	68564671	68564719	4	49	hypo	ENSG00000184939	ZFP90	702	7	2	-0.641697	0.00208164
chr16	68655924	68656184	3	261	hypo	ENSG00000062038	CDH3	22683	7	7	0.075799	0.933435
chr16	69433443	69433648	3	206	hyper	ENSG00000132604	TERF2	27373	5	5	-1.10992	1.62254e-07
chr16	69535730	69535908	3	179	hypo	ENSG00000102908	NFAT5	63176	5	5	2.658	2.4356e-08
chr16	69823289	69823420	6	132	hypo	ENSG00000198373	WWP2	27145	6	6	-0.515245	0.00175229
chr16	70145499	70145696	6	198	hyper	ENSG00000090857	PDPR	1930	7	7	0.340943	0.388656
chr16	70819173	70819212	3	40	hypo	ENSG00000103043	VAC14	97850	3	4	0.839072	0.000183026
chr16	70824357	70824498	5	142	hypo	ENSG00000103043	VAC14	103085	5	3	0.839072	0.000183026
chr16	71907203	71907361	3	159	hyper	ENSG00000102984	ZNF821	8480	7	7	-1.0387	7.17719e-06
chr16	72968586	72968803	8	218	hyper	ENSG00000140836	ZFHX3	151910	4	3	-0.0192655	0.953344
chr16	73045820	73045944	3	125	hyper	ENSG00000140836	ZFHX3	229098	5	5	-0.0192655	0.953344
chr16	73230808	73230918	3	111	hyper	ENSG00000197445	C16orf47	52516	7	7	-0.12385	NA
chr16	74657312	74657396	3	85	hyper	ENSG00000168411	RFWD3	2062	6	6	0.580638	0.00943738
chr16	74970759	74970770	3	12	hyper	ENSG00000103091	WDR59	63296	7	7	0.99525	1.86393e-07
chr16	75388725	75388933	3	209	hyper	ENSG00000153774	CFDP1	61221	7	7	-0.933965	1.75838e-05
chr16	77694848	77694864	4	17	hypo	ENSG00000140876	NUDT7	61553	7	7	-2.49282	7.18417e-16
chr16	78164612	78164835	3	224	hypo	ENSG00000186153	WWOX	31413	7	7	-1.66412	1.58492e-07
chr16	78891867	78892157	3	291	hyper	ENSG00000186153	WWOX	758702	7	7	-1.66412	1.58492e-07
chr16	79117050	79117085	3	36	hyper	ENSG00000186153	WWOX	983757	5	5	-1.66412	1.58492e-07
chr16	79135540	79136017	6	478	hypo	ENSG00000186153	WWOX	1002468	5	5	-1.66412	1.58492e-07
chr16	80614312	80614543	3	232	hypo	ENSG00000168589	DYNLRB2	39796	4	4	2.41247	0.0254523
chr16	80621091	80621290	3	200	hyper	ENSG00000168589	DYNLRB2	46559	4	4	2.41247	0.0254523
chr16	80704186	80704374	4	189	hyper	ENSG00000166446	CDYL2	72477	7	7	4.03933	6.92657e-23
chr16	80793310	80793638	5	329	hypo	ENSG00000166446	CDYL2	161671	4	3	4.03933	6.92657e-23
chr16	81506963	81507031	3	69	hyper	ENSG00000153815	CMIP	28222	5	5	-0.698156	0.0602201
chr16	81664960	81665028	3	69	hyper	ENSG00000153815	CMIP	186219	5	3	-0.698156	0.0602201
chr16	81763746	81763762	3	17	hypo	ENSG00000197943	PLCG2	8946	7	5	-1.162	2.72934e-05
chr16	83897261	83897547	3	287	hyper	ENSG00000103150	MLYCD	35325	7	7	-1.14248	2.19769e-09
chr16	84498318	84498408	3	91	hyper	ENSG00000140950	TLDC1	89275	7	6	1.2087	2.41788e-07
chr16	85063579	85063725	9	147	hyper	ENSG00000135709	KIAA0513	2277	2	3	0.541155	0.0713387
chr16	85084201	85084221	4	21	hypo	ENSG00000135709	KIAA0513	22836	5	5	0.541155	0.0713387
chr16	85129080	85129090	3	11	hyper	ENSG00000153789	FAM92B	17028	7	7	1.4646	0.480023
chr16	85137527	85137624	5	98	hypo	ENSG00000153789	FAM92B	5610	5	5	1.4646	0.480023
chr16	85193957	85194058	5	102	hyper	ENSG00000262601	CTC-786C10.1	10873	5	5	1.10884	NA
chr16	85470735	85470861	9	127	hyper	ENSG00000261567	RP11-680G10.1	79729	5	4	NA	NA
chr16	85511564	85511586	3	23	hypo	ENSG00000261567	RP11-680G10.1	120506	7	4	NA	NA
chr16	85603953	85604017	3	65	hyper	ENSG00000131149	GSE1	41028	3	3	-0.190975	0.516914
chr16	85858050	85858390	7	341	hypo	ENSG00000131148	EMC8	25005	5	4	-0.370423	0.0586537
chr16	86017636	86017715	4	80	hyper	ENSG00000140968	IRF8	85266	4	5	1.5662	0.0414696
chr16	87626304	87626501	4	198	hyper	ENSG00000154118	JPH3	10107	7	7	-0.463402	0.830653
chr16	87708903	87708992	4	90	hyper	ENSG00000154118	JPH3	72436	7	7	-0.463402	0.830653
chr16	87756961	87756983	3	23	hypo	ENSG00000205047	FLJ00104	17681	6	6	0.161912	0.677625
chr16	87890251	87890279	4	29	hypo	ENSG00000103257	SLC7A5	26636	7	7	1.39811	0.00911398
chr16	88083087	88083240	3	154	hyper	ENSG00000172530	BANP	99121	6	6	1.04752	3.25677e-05
chr16	88109168	88109188	4	21	hypo	ENSG00000172530	BANP	125136	6	7	1.04752	3.25677e-05
chr16	88177633	88177657	3	25	hypo	ENSG00000172530	BANP	193603	7	7	1.04752	3.25677e-05
chr16	88220402	88220435	4	34	hyper	ENSG00000172530	BANP	236376	7	7	1.04752	3.25677e-05
chr16	88511861	88511947	9	87	hypo	ENSG00000179588	ZFPM1	7819	7	7	-0.32472	0.319355
chr16	89012296	89012328	3	33	hyper	ENSG00000205018	RP11-830F9.6	6115	7	7	0.680073	0.403102
chr16	89069849	89069887	4	39	hyper	ENSG00000129993	CBFA2T3	26255	7	7	-0.797025	0.0118852
chr16	89114841	89114884	5	44	hyper	ENSG00000176715	ACSF3	39919	7	7	-0.649148	0.000421907
chr16	89395661	89395729	4	69	hyper	ENSG00000167522	ANKRD11	61657	5	3	1.03141	4.58004e-06
chr17	138719	138733	3	15	hypo	ENSG00000181031	RPH3AL	7166	7	7	-0.354689	0.37876
chr17	206022	206045	4	24	hyper	ENSG00000181031	RPH3AL	74473	7	7	-0.354689	0.37876
chr17	636679	636767	3	89	hyper	ENSG00000167695	FAM57A	1071	2	1	4.24239	6.26511e-23
chr17	676893	677317	9	425	hypo	ENSG00000167699	GLOD4	14768	5	3	0.709932	9.66695e-07
chr17	1039722	1039824	6	103	hyper	ENSG00000159842	ABR	53011	6	7	-1.03356	3.67474e-05
chr17	1074570	1074666	3	97	hypo	ENSG00000159842	ABR	87856	6	6	-1.03356	3.67474e-05
chr17	1258300	1258349	3	50	hypo	ENSG00000108953	YWHAE	10758	6	6	0.415468	0.017047
chr17	1452489	1452495	3	7	hypo	ENSG00000174238	PITPNA	31480	6	6	0.586793	0.00113162
chr17	1875697	1875824	4	128	hypo	ENSG00000185924	RTN4RL1	37789	5	5	-0.208974	0.901182
chr17	1911698	1911756	7	59	hyper	ENSG00000185924	RTN4RL1	73756	7	7	-0.208974	0.901182
chr17	2040701	2040851	5	151	hyper	ENSG00000070366	SMG6	77639	5	4	-0.02433	0.925981
chr17	2652455	2652488	6	34	hypo	ENSG00000132359	RAP1GAP2	27877	7	7	-1.99302	7.07672e-07
chr17	2703812	2703886	3	75	hypo	ENSG00000132359	RAP1GAP2	23499	5	5	-1.99302	7.07672e-07
chr17	2748028	2748058	3	31	hyper	ENSG00000132359	RAP1GAP2	67693	7	7	-1.99302	7.07672e-07
chr17	2843202	2843257	4	56	hyper	ENSG00000132359	RAP1GAP2	162879	5	4	-1.99302	7.07672e-07
chr17	3641365	3641443	4	79	hyper	ENSG00000083457	ITGAE	23482	7	7	-0.886184	0.00835741
chr17	3989372	3989734	7	363	hypo	ENSG00000074755	ZZEF1	81814	6	4	0.370754	0.0532153
chr17	4004880	4004981	3	102	hypo	ENSG00000074755	ZZEF1	97191	1	1	0.370754	0.0532153
chr17	4207501	4207599	5	99	hyper	ENSG00000132388	UBE2G1	32275	6	6	0.247046	0.288867
chr17	4270403	4270409	3	7	hyper	ENSG00000132388	UBE2G1	482	3	1	0.247046	0.288867
chr17	4429465	4429505	3	41	hyper	ENSG00000183018	SPNS2	27352	5	5	-0.643549	0.235688
chr17	4581613	4581673	3	61	hyper	ENSG00000141456	PELP1	6963	4	3	-0.735946	0.0345588
chr17	4738948	4739180	4	233	hypo	ENSG00000141503	MINK1	2381	3	1	0.929956	0.000112009
chr17	4789459	4789650	4	192	hyper	ENSG00000141503	MINK1	52871	3	3	0.929956	0.000112009
chr17	4999899	4999949	3	51	hypo	ENSG00000180787	ZFP3	18381	2	7	-0.573365	0.0708751
chr17	5365539	5365584	4	46	hyper	ENSG00000005100	DHX33	21329	7	7	-0.318227	0.153218
chr17	5524330	5524865	7	536	hypo	ENSG00000091592	NLRP1	1852	7	4	-1.0135	0.00159503
chr17	6884470	6884572	4	103	hypo	ENSG00000108839	ALOX12	14861	7	7	0.555492	0.0819171
chr17	6955793	6955805	3	13	hypo	ENSG00000174326	SLC16A11	8556	4	7	-1.88415	0.0332238
chr17	7219228	7219261	3	34	hyper	ENSG00000261915	RP11-542C16.2	3264	3	3	-1.47186	0.314162
chr17	7801765	7801960	3	196	hypo	ENSG00000170004	CHD3	13738	5	3	2.02244	3.63442e-22
chr17	7997033	7997168	3	136	hypo	ENSG00000179477	ALOX12B	6078	7	7	-0.388097	0.842731
chr17	8839031	8839109	4	79	hypo	ENSG00000141506	PIK3R5	56834	4	4	0.571794	0.00107864
chr17	8848035	8848064	3	30	hypo	ENSG00000141506	PIK3R5	65813	5	5	0.571794	0.00107864
chr17	9921339	9921553	3	215	hypo	ENSG00000007237	GAS7	104279	3	3	-2.375	1.55244e-09
chr17	10475383	10475530	4	148	hyper	ENSG00000125414	MYH2	22181	7	7	0.976672	NA
chr17	12178125	12178374	3	250	hyper	ENSG00000065559	MAP2K4	254108	7	7	0.95886	2.55242e-10
chr17	12928162	12928197	3	36	hypo	ENSG00000006744	ELAC2	6674	7	7	-0.425352	0.0239562
chr17	14213089	14213114	3	26	hyper	ENSG00000125430	HS3ST3B1	8701	3	3	1.52667	0.03253
chr17	14262636	14262681	3	46	hyper	ENSG00000125430	HS3ST3B1	58258	4	4	1.52667	0.03253
chr17	14277022	14277562	8	541	hypo	ENSG00000125430	HS3ST3B1	72892	5	4	1.52667	0.03253
chr17	14362245	14362402	3	158	hypo	ENSG00000125430	HS3ST3B1	157923	7	7	1.52667	0.03253
chr17	15165657	15165670	4	14	hypo	ENSG00000109099	PMP22	31279	2	1	3.87531	8.86002e-45
chr17	15174542	15174725	3	184	hypo	ENSG00000109099	PMP22	5989	4	4	3.87531	8.86002e-45
chr17	15577278	15577423	5	146	hypo	ENSG00000221926	TRIM16	37830	7	7	0.675211	0.0168874
chr17	15653469	15653493	5	25	hypo	ENSG00000214946	TBC1D26	17920	7	7	NA	NA
chr17	16127514	16127570	3	57	hyper	ENSG00000108474	PIGL	7019	7	7	0.22819	0.367313
chr17	16276663	16276911	5	249	hypo	ENSG00000170315	UBB	7323	4	3	0.753105	0.0102462
chr17	17656052	17656127	4	76	hypo	ENSG00000108557	RAI1	71302	3	3	-0.528867	0.117018
chr17	17695925	17695949	3	25	hyper	ENSG00000108557	RAI1	111150	7	6	-0.528867	0.117018
chr17	17976353	17976584	3	232	hyper	ENSG00000108591	DRG2	14730	7	7	-0.451814	0.00726955
chr17	19245009	19245054	4	46	hypo	ENSG00000108641	B9D1	4164	7	7	-0.847246	0.189925
chr17	19826680	19826880	5	201	hypo	ENSG00000108599	AKAP10	19165	5	5	0.138023	0.606626
chr17	21190331	21190417	3	87	hypo	ENSG00000034152	MAP2K3	2390	3	1	0.35139	0.23874
chr17	21415894	21415911	3	18	hypo	ENSG00000212719	C17orf51	39040	7	7	-1.52206	1.06656e-13
chr17	25867805	25868018	5	214	hyper	ENSG00000141068	KSR1	84241	4	3	2.69815	4.42878e-14
chr17	27093395	27093541	4	147	hyper	ENSG00000173065	FAM222B	6899	6	6	1.53004	1.61259e-12
chr17	28004485	28004719	3	235	hypo	ENSG00000167549	CORO6	54679	5	5	-0.581147	0.178333
chr17	29164592	29164712	3	121	hyper	ENSG00000176208	ATAD5	5664	7	7	0.639505	0.016975
chr17	30935761	30935824	3	64	hyper	ENSG00000176658	MYO1D	116252	7	7	-1.10323	0.0137782
chr17	34083614	34083644	3	31	hyper	ENSG00000129270	MMP28	360	5	5	0.0760465	0.957274
chr17	34207454	34207663	5	210	hypo	ENSG00000161570	CCL5	9063	7	4	4.27269	2.37917e-19
chr17	35589445	35589772	3	328	hypo	ENSG00000132142	ACACA	147685	6	6	0.228659	0.338564
chr17	36413806	36413812	3	7	hypo	ENSG00000174093	RP11-1407O15.2	61873	7	7	0.862068	0.000268886
chr17	36641662	36641756	3	95	hyper	ENSG00000225485	ARHGAP23	57047	7	7	-2.04249	0.000297938
chr17	36703796	36703919	5	124	hypo	ENSG00000017373	SRCIN1	17606	5	5	0.89007	0.0214916
chr17	38076680	38077191	12	512	hypo	ENSG00000073605	GSDMB	2031	4	4	1.94063	3.69751e-20
chr17	38084816	38085045	3	230	hypo	ENSG00000172057	ORMDL3	1075	5	3	1.9414	2.22863e-15
chr17	38643280	38643441	4	162	hyper	ENSG00000131746	TNS4	11280	7	7	1.16942	0.168188
chr17	38717200	38717499	15	300	hypo	ENSG00000126353	CCR7	7328	5	1	7.3524	2.78337e-29
chr17	38733873	38734001	3	129	hypo	ENSG00000126353	CCR7	12212	7	4	7.3524	2.78337e-29
chr17	38737573	38738254	6	682	hypo	ENSG00000126353	CCR7	16188	7	4	7.3524	2.78337e-29
chr17	38755603	38755933	10	331	hypo	ENSG00000126353	CCR7	34043	4	4	7.3524	2.78337e-29
chr17	39844139	39844239	3	101	hyper	ENSG00000173812	EIF1	948	4	3	1.14945	7.84585e-09
chr17	39992840	39992872	4	33	hyper	ENSG00000161594	KLHL10	919	7	7	-1.78554	NA
chr17	40720101	40720107	3	7	hypo	ENSG00000108788	MLX	1018	3	1	0.186051	0.41373
chr17	41007321	41007341	4	21	hyper	ENSG00000131471	AOC3	4130	5	5	1.35237	0.0175426
chr17	41139397	41139466	4	70	hypo	ENSG00000198863	RUNDC1	6849	5	3	0.327021	0.0492847
chr17	41281255	41281583	7	329	hyper	ENSG00000012048	BRCA1	3918	7	5	-0.0620263	0.851667
chr17	41751331	41751372	3	42	hyper	ENSG00000005102	MEOX1	12028	7	7	-1.36419	0.362935
chr17	41908140	41908214	4	75	hypo	ENSG00000161647	MPP3	29391	5	5	1.59903	0.000131333
chr17	42270587	42270627	3	41	hyper	ENSG00000168591	TMUB2	6269	5	5	-0.0279329	0.924703
chr17	42302750	42302799	3	50	hyper	ENSG00000108312	UBTF	3779	7	7	-0.0462018	0.847287
chr17	42425180	42425266	5	87	hyper	ENSG00000030582	GRN	2593	3	3	-1.32632	0.000101118
chr17	42857035	42857075	3	41	hypo	ENSG00000073670	ADAM11	20656	7	7	-0.112279	0.899993
chr17	43113121	43113395	6	275	hypo	ENSG00000172992	DCAKD	1930	6	5	0.410951	0.0177918
chr17	45078450	45078519	4	70	hypo	ENSG00000262633	RP11-156P1.2	77985	7	7	NA	NA
chr17	46157645	46157695	3	51	hypo	ENSG00000108468	CBX1	10256	7	7	0.425333	0.0907342
chr17	46520283	46520417	3	135	hyper	ENSG00000141293	SKAP1	12712	5	7	0.219919	0.629262
chr17	46697115	46697130	3	16	hyper	ENSG00000120068	HOXB8	4643	7	7	NA	NA
chr17	47493025	47493045	4	21	hypo	ENSG00000262039	RP11-81K2.1	44933	7	7	-1.22316	0.00104916
chr17	47844188	47844307	3	120	hyper	ENSG00000121104	FAM117A	55890	7	7	1.56629	1.84907e-07
chr17	47968804	47969172	6	369	hypo	ENSG00000176358	TAC4	43608	5	5	0.361223	0.691549
chr17	48661153	48661196	3	44	hyper	ENSG00000006283	CACNA1G	22745	7	7	1.4711	9.98906e-05
chr17	48685332	48685356	5	25	hyper	ENSG00000006283	CACNA1G	46915	5	5	1.4711	9.98906e-05
chr17	48961285	48961685	4	401	hyper	ENSG00000141232	TOB1	16145	4	5	0.144173	0.694866
chr17	48964854	48964970	3	117	hyper	ENSG00000141232	TOB1	19572	4	5	0.144173	0.694866
chr17	49166153	49166221	3	69	hypo	ENSG00000008294	SPAG9	126652	5	5	1.48688	2.12975e-10
chr17	53372787	53372913	5	127	hypo	ENSG00000108924	HLF	30477	7	7	1.0577	0.281856
chr17	53923046	53923053	4	8	hyper	ENSG00000141179	PCTP	94709	7	2	-1.48958	5.57084e-10
chr17	54896771	54896944	3	174	hyper	ENSG00000214226	C17orf67	27583	7	7	1.75483	6.58718e-05
chr17	54986416	54986513	3	98	hypo	ENSG00000121060	TRIM25	21194	4	4	1.39412	0.000443189
chr17	55063557	55063643	3	87	hyper	ENSG00000121064	SCPEP1	8134	7	6	0.0297739	0.962718
chr17	55928956	55929077	3	122	hyper	ENSG00000181610	MRPS23	1598	4	5	-0.448373	0.0158597
chr17	56066535	56066769	3	235	hyper	ENSG00000266086	RP11-159D12.5	253	3	5	NA	NA
chr17	56309180	56309436	3	257	hyper	ENSG00000167419	LPO	13399	5	4	-0.106088	0.830594
chr17	56564855	56564906	5	52	hyper	ENSG00000176160	HSF5	67352	7	7	2.16623	0.000811881
chr17	56590804	56590844	4	41	hyper	ENSG00000108389	MTMR4	23926	5	1	2.00877	1.7161e-13
chr17	57954255	57954304	3	50	hyper	ENSG00000108423	TUBD1	16596	6	6	0.728906	0.00109697
chr17	58471538	58471716	4	179	hyper	ENSG00000141371	C17orf64	1837	4	5	-1.31994	0.0352837
chr17	58514635	58514937	4	303	hypo	ENSG00000170832	USP32	14954	4	4	0.252392	0.269255
chr17	60595338	60595556	5	219	hyper	ENSG00000146872	TLK2	59428	7	7	0.985202	3.48316e-09
chr17	60859951	60860009	4	59	hyper	ENSG00000173838	2015-03-10	81304	7	7	-0.654879	NA
chr17	61787836	61787919	4	84	hypo	ENSG00000125695	RP11-51F16.8	7672	6	6	-1.11062	NA
chr17	62193639	62194192	10	554	hypo	ENSG00000178607	ERN1	14263	7	3	2.29906	1.13948e-18
chr17	62690614	62690707	3	94	hyper	ENSG00000108854	SMURF2	32473	7	7	1.24377	6.47863e-06
chr17	62735839	62736224	8	386	hypo	ENSG00000108854	SMURF2	77844	4	4	1.24377	6.47863e-06
chr17	62781072	62781086	4	15	hypo	ENSG00000108854	SMURF2	122892	7	7	1.24377	6.47863e-06
chr17	62844456	62844500	3	45	hyper	ENSG00000176809	LRRC37A3	71119	7	7	0.459188	0.0804692
chr17	63016923	63017145	4	223	hyper	ENSG00000120063	GNA13	10201	5	3	2.21928	3.26397e-16
chr17	63053862	63054106	10	245	hypo	ENSG00000120063	GNA13	1026	3	1	2.21928	3.26397e-16
chr17	64437234	64437331	3	98	hyper	ENSG00000154229	PRKCA	138528	7	5	1.14012	0.00757831
chr17	64437674	64437806	4	133	hyper	ENSG00000154229	PRKCA	138986	1	3	1.14012	0.00757831
chr17	65574139	65574408	8	270	hypo	ENSG00000154217	PITPNC1	200698	4	4	0.65909	0.0315144
chr17	66221374	66221534	3	161	hypo	ENSG00000196704	AMZ2	22259	7	7	0.938292	7.07672e-07
chr17	66269780	66270089	4	310	hyper	ENSG00000108932	SLC16A6	2165	3	3	-0.659679	0.244806
chr17	67549538	67549760	5	223	hyper	ENSG00000108984	MAP2K6	138810	5	5	-2.34635	6.85488e-11
chr17	70196075	70196321	3	247	hypo	ENSG00000125398	SOX9	79037	7	7	1.06512	0.480293
chr17	71024430	71024704	6	275	hypo	ENSG00000133195	SLC39A11	64283	6	4	-1.64902	4.82446e-18
chr17	71304278	71304358	3	81	hyper	ENSG00000179604	CDC42EP4	24555	3	5	-0.0472537	0.890329
chr17	71908312	71908348	4	37	hypo	ENSG00000069188	SDK2	268101	7	7	0.31627	0.71258
chr17	72021092	72021351	5	260	hypo	ENSG00000172809	RPL38	178498	4	4	-0.723809	0.00134451
chr17	72146918	72147086	4	169	hyper	ENSG00000172809	RPL38	52717	7	7	-0.723809	0.00134451
chr17	72172971	72173122	3	152	hyper	ENSG00000172809	RPL38	26673	7	7	-0.723809	0.00134451
chr17	72228859	72229011	3	153	hypo	ENSG00000141540	TTYH2	19282	5	3	3.50375	1.76872e-23
chr17	73240294	73240368	6	75	hypo	ENSG00000125447	GGA3	6012	5	5	-0.435147	0.00705863
chr17	73522731	73522888	5	158	hypo	ENSG00000073350	LLGL2	1648	3	3	0.0191032	0.968281
chr17	74249202	74249212	3	11	hyper	ENSG00000185262	UBALD2	12074	5	5	0.236178	0.598991
chr17	74756625	74756673	4	49	hypo	ENSG00000092931	MFSD11	24702	7	6	-0.189652	0.372755
chr17	75781036	75781180	4	145	hyper	ENSG00000204283	FLJ45079	97550	7	7	NA	NA
chr17	76024474	76024676	3	203	hyper	ENSG00000078687	TNRC6C	24326	7	7	-0.917813	0.000221379
chr17	76397211	76397410	3	200	hyper	ENSG00000087157	PGS1	22589	5	5	0.544154	0.0508844
chr17	76439374	76439426	4	53	hypo	ENSG00000187775	DNAH17	19622	4	4	0.771217	0.0848326
chr17	76730931	76731264	5	334	hypo	ENSG00000108669	CYTH1	60967	3	1	1.69579	1.65459e-20
chr17	76965471	76965587	5	117	hyper	ENSG00000108679	LGALS3BP	10661	7	5	0.34174	0.720449
chr17	77034940	77035170	5	231	hypo	ENSG00000173918	C1QTNF1	16159	7	4	8.35215	9.71062e-11
chr17	77389312	77389320	3	9	hypo	ENSG00000167281	RBFOX3	302418	7	7	-0.127924	0.769286
chr17	77999267	77999356	3	90	hyper	ENSG00000167291	TBC1D16	93169	7	7	-1.8789	5.79824e-08
chr17	78336715	78336840	4	126	hypo	ENSG00000173821	RNF213	102112	6	6	2.14218	1.32501e-14
chr17	78549473	78549510	3	38	hyper	ENSG00000141564	RPTOR	30872	7	7	-0.218444	0.387154
chr17	78708416	78708607	3	192	hypo	ENSG00000141564	RPTOR	189892	5	7	-0.218444	0.387154
chr17	79328944	79328977	3	34	hyper	ENSG00000185332	TMEM105	24485	5	5	0.0909868	0.878976
chr17	79422508	79422558	4	51	hypo	ENSG00000171282	RP11-1055B8.7	48993	7	6	-1.22159	8.11082e-09
chr17	79666745	79666775	3	31	hyper	ENSG00000262814	MRPL12	3625	6	6	-1.40829	0.000235477
chr17	79996753	79996924	4	172	hyper	ENSG00000169738	DCXR	1229	7	7	-2.02198	3.58682e-10
chr17	80310080	80310198	4	119	hypo	ENSG00000182459	TEX19	6982	7	7	3.63378	NA
chr17	80924907	80924989	5	83	hyper	ENSG00000175711	B3GNTL1	23281	7	7	-1.95368	9.90167e-10
chr17	81153274	81153288	3	15	hypo	ENSG00000176845	METRNL	115714	7	7	-1.111	0.0368024
chr18	331300	331602	7	303	hypo	ENSG00000158270	COLEC12	12090	4	3	3.76178	6.12205e-31
chr18	369763	369819	3	57	hypo	ENSG00000158270	COLEC12	50430	5	5	3.76178	6.12205e-31
chr18	447008	447296	3	289	hypo	ENSG00000158270	COLEC12	127791	4	5	3.76178	6.12205e-31
chr18	3367859	3368077	3	219	hypo	ENSG00000177426	TGIF1	43636	5	7	2.29288	6.45113e-20
chr18	3441464	3441729	3	266	hypo	ENSG00000177426	TGIF1	29990	5	5	2.29288	6.45113e-20
chr18	6363278	6363687	9	410	hypo	ENSG00000154655	L3MBTL4	118916	7	4	5.50717	5.63067e-35
chr18	7138503	7138519	3	17	hyper	ENSG00000101680	LAMA1	20697	7	7	-0.122742	0.87841
chr18	7572809	7572925	3	117	hypo	ENSG00000173482	PTPRM	6087	7	7	-0.279268	0.525195
chr18	9867154	9867630	5	477	hypo	ENSG00000168454	TXNDC2	18369	4	3	-0.732588	0.21304
chr18	10020437	10020652	4	216	hyper	ENSG00000101558	VAPA	106545	5	5	1.08155	7.93459e-07
chr18	10060561	10060636	5	76	hyper	ENSG00000101558	VAPA	146599	4	4	1.08155	7.93459e-07
chr18	11519446	11519490	3	45	hyper	ENSG00000141404	GNAL	169485	7	7	-1.11267	7.52478e-05
chr18	12067113	12067121	3	9	hypo	ENSG00000181626	ANKRD62	26733	7	7	-0.0529132	0.924874
chr18	12309879	12310216	4	338	hyper	ENSG00000176014	TUBB6	2379	3	1	-0.399228	0.0249704
chr18	12328142	12328263	3	122	hypo	ENSG00000176014	TUBB6	20534	6	6	-0.399228	0.0249704
chr18	13223601	13223675	4	75	hypo	ENSG00000168675	LDLRAD4	5613	3	3	-0.719302	0.0500226
chr18	13319589	13319863	5	275	hypo	ENSG00000168675	LDLRAD4	101701	7	4	-0.719302	0.0500226
chr18	19363618	19363902	3	285	hyper	ENSG00000101752	MIB1	42479	6	6	0.325623	0.262643
chr18	20376973	20377014	3	42	hyper	ENSG00000101773	RBBP8	1229	7	7	0.488622	0.0317655
chr18	21631494	21631825	6	332	hypo	ENSG00000168234	TTC39C	58922	7	4	-1.3276	3.74967e-06
chr18	22211882	22211900	3	19	hypo	ENSG00000134489	HRH4	171298	7	7	-0.68459	0.101867
chr18	22565601	22565858	4	258	hyper	ENSG00000198795	ZNF521	366389	7	7	1.51088	0.000213864
chr18	22693639	22693712	3	74	hyper	ENSG00000198795	ZNF521	51118	7	7	1.51088	0.000213864
chr18	23669128	23669266	4	139	hypo	ENSG00000141380	SS18	71890	1	1	0.820118	8.28124e-05
chr18	23770438	23770707	5	270	hyper	ENSG00000154611	PSMA8	56756	7	7	1.56526	0.421615
chr18	23809718	23809758	3	41	hyper	ENSG00000141384	TAF4B	3838	7	7	0.0644451	0.893895
chr18	24388919	24389334	4	416	hypo	ENSG00000171885	AQP4	56655	7	5	1.87559	NA
chr18	26732887	26733133	3	247	hyper	ENSG00000170558	CDH2	975599	7	7	-3.72469	2.66936e-12
chr18	29408614	29408620	3	7	hyper	ENSG00000141437	SLC25A52	67773	7	6	2.11182	0.0550197
chr18	29453270	29453314	3	45	hypo	ENSG00000153339	TRAPPC8	43391	6	6	0.527771	0.0562627
chr18	29513921	29514129	3	209	hyper	ENSG00000153339	TRAPPC8	104124	7	6	0.527771	0.0562627
chr18	30672630	30672922	3	293	hypo	ENSG00000197705	KLHL14	319750	7	7	-0.630901	NA
chr18	33529929	33529943	3	15	hyper	ENSG00000141428	C18orf21	22108	2	7	-0.712845	5.13018e-05
chr18	33791077	33791140	3	64	hypo	ENSG00000075643	MOCOS	23626	6	4	-0.39528	0.511527
chr18	42176777	42176789	3	13	hyper	ENSG00000152217	SETBP1	83353	7	7	0.672524	0.17009
chr18	42419922	42420124	3	203	hypo	ENSG00000152217	SETBP1	159885	7	7	0.672524	0.17009
chr18	46281430	46281820	6	391	hypo	ENSG00000134030	CTIF	216208	5	5	-1.35835	1.11989e-06
chr18	46289174	46289239	4	66	hyper	ENSG00000134030	CTIF	223789	6	6	-1.35835	1.11989e-06
chr18	46433256	46433323	3	68	hypo	ENSG00000101665	SMAD7	43791	7	7	1.24094	1.31961e-09
chr18	46744149	46744220	4	72	hyper	ENSG00000141627	DYM	243532	7	7	-0.782499	6.51211e-06
chr18	48357511	48357517	3	7	hyper	ENSG00000134042	MRO	5741	4	7	-0.142475	NA
chr18	48847763	48847973	3	211	hyper	ENSG00000176624	MEX3C	124177	7	7	1.10465	8.24662e-06
chr18	51549992	51550279	5	288	hyper	ENSG00000134046	MBD2	201022	7	7	1.07276	8.9063e-07
chr18	52636083	52636267	4	185	hypo	ENSG00000166510	CCDC68	9435	7	7	7.8551	0.000134301
chr18	52897656	52897687	3	32	hyper	ENSG00000166510	CCDC68	270931	6	6	7.8551	0.000134301
chr18	53445944	53446034	3	91	hyper	ENSG00000196628	TCF4	113970	2	3	-0.733201	0.00626369
chr18	53448085	53448189	3	105	hypo	ENSG00000196628	TCF4	116118	7	7	-0.733201	0.00626369
chr18	54179162	54179483	3	322	hypo	ENSG00000091157	WDR7	139250	5	4	0.0291679	0.918755
chr18	54321425	54321660	5	236	hypo	ENSG00000091157	WDR7	2968	7	5	0.0291679	0.918755
chr18	55988849	55988875	3	27	hypo	ENSG00000049759	NEDD4L	277263	4	4	2.23239	1.45209e-06
chr18	56217161	56217219	4	59	hyper	ENSG00000198796	ALPK2	68711	5	5	4.29948	3.37271e-14
chr18	57576384	57576852	6	469	hypo	ENSG00000141682	PMAIP1	9438	7	4	5.86233	8.9325e-26
chr18	59831656	59831907	5	252	hypo	ENSG00000197563	PIGN	6784	7	7	-0.59857	0.00321589
chr18	59990936	59990985	3	50	hypo	ENSG00000141655	TNFRSF11A	1558	7	4	2.11362	6.43542e-15
chr18	60278429	60278488	5	60	hyper	ENSG00000141664	ZCCHC2	88218	5	5	-0.311042	0.2581
chr18	60729700	60729788	4	89	hyper	ENSG00000269630	AC015989.2	223795	7	7	NA	NA
chr18	60826170	60826611	8	442	hypo	ENSG00000171791	BCL2	35811	5	4	3.70162	5.68063e-22
chr18	60828003	60829022	14	1020	hypo	ENSG00000171791	BCL2	37933	4	4	3.70162	5.68063e-22
chr18	60850044	60850263	4	220	hyper	ENSG00000171791	BCL2	59574	5	7	3.70162	5.68063e-22
chr18	60924743	60925167	7	425	hypo	ENSG00000171791	BCL2	134376	7	4	3.70162	5.68063e-22
chr18	61695025	61695380	3	356	hypo	ENSG00000166401	SERPINB8	58043	7	4	0.513931	0.172511
chr18	65085556	65085608	3	53	hyper	ENSG00000171451	DSEL	98634	1	1	-0.616451	0.13742
chr18	70787000	70787398	4	399	hyper	ENSG00000263711	RP11-169F17.1	144515	7	7	0.225974	0.75578
chr18	72704397	72704857	7	461	hypo	ENSG00000180011	ZADH2	216675	5	4	0.707308	0.00214033
chr18	73105782	73105888	3	107	hypo	ENSG00000264116	RP11-321M21.3	13130	7	7	NA	NA
chr18	74191994	74192007	3	14	hyper	ENSG00000101493	ZNF516	122356	7	5	0.637155	0.013404
chr18	76695123	76695172	6	50	hyper	ENSG00000256463	SALL3	45126	7	7	2.1633	NA
chr18	76745259	76745272	4	14	hypo	ENSG00000256463	SALL3	4990	2	2	2.1633	NA
chr18	76970322	76970400	4	79	hyper	ENSG00000166377	ATP9B	141076	5	5	-0.129841	0.591853
chr18	77352829	77352888	3	60	hyper	ENSG00000269679	AC018445.1	76800	7	7	0.290094	NA
chr18	77369046	77369139	5	94	hyper	ENSG00000060069	CTDP1	70707	7	7	-0.0692658	0.750278
chr18	78015897	78016160	4	264	hyper	ENSG00000178184	PARD6G	10598	7	7	1.16825	2.56979e-05
chr19	357346	357445	5	100	hyper	ENSG00000105556	MIER2	12601	7	7	-0.307222	0.140207
chr19	848324	848357	3	34	hyper	ENSG00000197561	ELANE	2672	5	5	-1.49145	0.000109404
chr19	948345	948433	8	89	hypo	ENSG00000116017	ARID3A	22389	4	3	0.874611	1.03766e-06
chr19	955034	955082	3	49	hyper	ENSG00000116017	ARID3A	29058	4	5	0.874611	1.03766e-06
chr19	1184043	1184172	4	130	hypo	ENSG00000064932	SBNO2	9824	4	4	1.2299	6.25242e-07
chr19	1519285	1519427	3	143	hypo	ENSG00000185988	PLK5	4715	7	7	1.01757	NA
chr19	1767183	1767268	3	86	hyper	ENSG00000205922	ONECUT3	14853	7	7	-0.32273	0.444242
chr19	1943610	1943743	11	134	hyper	ENSG00000133275	CSNK1G2	2488	3	3	-0.443281	0.00488136
chr19	2057498	2057632	6	135	hyper	ENSG00000099875	MKNK2	6321	7	7	0.670722	0.000161601
chr19	2457358	2457371	5	14	hypo	ENSG00000176619	LMNB2	369	4	3	2.16309	1.68017e-33
chr19	3182968	3183287	5	320	hyper	ENSG00000125912	NCLN	2432	7	7	-1.01406	0.000130039
chr19	3384417	3384447	3	31	hyper	ENSG00000141905	NFIC	24871	4	5	0.206667	0.177602
chr19	3413914	3413991	3	78	hypo	ENSG00000141905	NFIC	54391	6	6	0.206667	0.177602
chr19	4181850	4181867	3	18	hyper	ENSG00000077463	SIRT6	7752	1	1	-0.214841	0.416448
chr19	4323447	4323480	3	34	hypo	ENSG00000105255	FSD1	18866	7	7	0.166068	0.774706
chr19	4344269	4344298	3	30	hyper	ENSG00000008382	MPND	759	3	3	-1.21662	1.86831e-06
chr19	4370340	4370404	5	65	hypo	ENSG00000141985	SH3GL1	10005	3	3	-1.28199	1.38779e-09
chr19	4380026	4380223	4	198	hyper	ENSG00000141985	SH3GL1	19757	3	4	-1.28199	1.38779e-09
chr19	4386175	4386358	7	184	hyper	ENSG00000141985	SH3GL1	25899	3	5	-1.28199	1.38779e-09
chr19	4544149	4544179	4	31	hyper	ENSG00000167680	SEMA6B	1559	7	7	3.18554	1.44927e-06
chr19	4719606	4719896	12	291	hypo	ENSG00000142002	DPP9	5633	3	3	0.499282	0.00593959
chr19	4899922	4899944	3	23	hyper	ENSG00000205784	ARRDC5	9484	7	7	-2.78549	8.94241e-20
chr19	5216658	5216747	5	90	hypo	ENSG00000105426	PTPRS	11183	7	7	0.944199	2.0606e-05
chr19	5987242	5987357	6	116	hyper	ENSG00000031823	RANBP3	9145	7	7	-0.251373	0.189813
chr19	6738340	6738430	3	91	hyper	ENSG00000125733	TRIP10	449	4	3	3.56634	7.04986e-42
chr19	6744214	6744264	3	51	hypo	ENSG00000125733	TRIP10	6303	6	3	3.56634	7.04986e-42
chr19	8196956	8197008	3	53	hyper	ENSG00000142449	FBN3	66696	7	7	0.882362	NA
chr19	8258007	8258642	6	636	hypo	ENSG00000090661	CERS4	13294	7	4	2.17666	7.78224e-14
chr19	9190183	9190323	3	141	hypo	ENSG00000170929	OR1M1	13600	7	7	0.976672	NA
chr19	9394477	9394492	5	16	hypo	ENSG00000196110	ZNF699	25764	7	7	0.636836	0.167718
chr19	10496862	10497273	5	412	hypo	ENSG00000105397	TYK2	5714	7	4	0.367865	0.0620673
chr19	10616221	10616236	4	16	hyper	ENSG00000079999	KEAP1	1810	7	7	0.46406	0.0271427
chr19	10970339	10970525	4	187	hypo	ENSG00000214212	C19orf38	23181	4	4	-0.696428	0.000189697
chr19	11407644	11407703	3	60	hyper	ENSG00000130167	TSPAN16	849	5	5	-3.10451	4.58056e-06
chr19	11622201	11622326	3	126	hypo	ENSG00000130159	ECSIT	5532	6	6	-1.3825	6.27738e-08
chr19	12713086	12713126	5	41	hypo	ENSG00000188033	ZNF490	24331	6	6	-0.509392	0.03086
chr19	12952521	12952560	3	40	hypo	ENSG00000105613	MAST1	7775	7	7	0.43364	0.456679
chr19	13267394	13267679	5	286	hypo	ENSG00000160888	IER2	6307	5	4	0.807039	0.00105935
chr19	13507791	13507824	3	34	hyper	ENSG00000141837	CACNA1A	25232	7	7	2.32663	6.76224e-06
chr19	13886205	13886252	5	48	hyper	ENSG00000104979	C19orf53	1246	3	3	-0.548913	0.0380498
chr19	13895525	13895736	4	212	hypo	ENSG00000214109	AC008686.1	4746	7	7	0.460566	0.0598767
chr19	14062613	14062631	3	19	hyper	ENSG00000132000	PODNL1	19141	2	2	-2.94177	2.52577e-14
chr19	14281869	14281948	3	80	hypo	ENSG00000072071	LPHN1	21158	7	6	-1.13354	1.50116e-08
chr19	14318742	14318839	3	98	hypo	ENSG00000072071	LPHN1	1790	7	7	-1.13354	1.50116e-08
chr19	14473602	14473730	4	129	hyper	ENSG00000123146	CD97	18300	5	5	-0.597699	0.0877299
chr19	14532973	14533238	3	266	hypo	ENSG00000123136	DDX39A	2925	5	5	0.135419	0.639231
chr19	14674714	14674749	3	36	hypo	ENSG00000099797	TECR	34359	6	6	-1.61091	3.39437e-13
chr19	14897932	14897992	5	61	hypo	ENSG00000127507	EMR2	8608	7	7	-0.265858	0.747668
chr19	15318502	15318540	3	39	hypo	ENSG00000074181	NOTCH3	6728	7	7	0.547436	0.34182
chr19	15488866	15488929	6	64	hyper	ENSG00000105127	AKAP8	7941	3	1	0.489137	0.0048639
chr19	15580010	15580042	3	33	hypo	ENSG00000105122	RASAL3	4643	7	7	-0.30225	0.315336
chr19	15581146	15581170	3	25	hyper	ENSG00000105122	RASAL3	5775	7	7	-0.30225	0.315336
chr19	16010500	16010534	8	35	hyper	ENSG00000186115	CYP4F2	1586	7	7	-3.47812	3.80101e-06
chr19	16191101	16191162	3	62	hypo	ENSG00000167460	TPM4	13300	3	1	0.129452	0.750337
chr19	16266469	16266715	5	247	hypo	ENSG00000196684	HSH2D	21754	6	5	2.69992	1.06869e-20
chr19	16292335	16292409	5	75	hypo	ENSG00000105058	FAM32A	3817	7	7	-0.526353	0.00344624
chr19	16688459	16688525	5	67	hypo	ENSG00000268790	CTC-429P9.4	31	5	3	0.480606	0.887796
chr19	16813025	16813068	3	44	hyper	ENSG00000188039	NWD1	17739	7	7	0.285556	0.451078
chr19	17166584	17166661	7	78	hyper	ENSG00000131351	HAUS8	6051	5	5	-0.201827	0.457633
chr19	17180192	17180283	4	92	hyper	ENSG00000131351	HAUS8	19666	5	5	-0.201827	0.457633
chr19	17320344	17320355	3	12	hypo	ENSG00000099331	MYO9B	133758	5	6	0.697941	0.000107771
chr19	17481534	17481593	3	60	hypo	ENSG00000130300	PLVAP	19306	4	4	1.05604	0.0775881
chr19	17941069	17941173	4	105	hypo	ENSG00000105639	JAK3	5526	7	6	4.30555	1.19939e-21
chr19	18405508	18405585	4	78	hypo	ENSG00000130522	JUND	13113	7	7	0.0740866	0.814292
chr19	18504705	18504761	3	57	hyper	ENSG00000175489	LRRC25	2779	3	3	-2.41258	0.00214508
chr19	19368658	19368662	3	5	hypo	ENSG00000187664	HAPLN4	2210	7	7	NA	NA
chr19	19659985	19660018	3	34	hyper	ENSG00000160161	CILP2	10944	7	7	3.30971	1.74209e-09
chr19	19708892	19709058	5	167	hypo	ENSG00000105717	PBX4	36453	4	4	3.60994	1.34599e-13
chr19	20012771	20012830	4	60	hypo	ENSG00000184635	ZNF93	1063	2	1	-0.141591	0.681083
chr19	21498996	21499028	3	33	hyper	ENSG00000182141	ZNF708	23606	7	7	0.0865182	0.805354
chr19	21542665	21542899	3	235	hypo	ENSG00000172687	ZNF738	1050	1	2	-0.674883	0.00667553
chr19	22234980	22234996	4	17	hypo	ENSG00000197134	ZNF257	264	7	2	-0.00762481	0.984124
chr19	23945432	23945472	3	41	hyper	ENSG00000205246	RPSAP58	353	2	2	-1.10613	0.0029728
chr19	30158121	30158158	3	38	hypo	ENSG00000166289	PLEKHF1	2176	4	5	-0.824356	0.00491153
chr19	30185556	30185682	3	127	hyper	ENSG00000131943	C19orf12	20562	5	7	1.07272	8.7353e-07
chr19	30705279	30705461	3	183	hypo	ENSG00000198597	ZNF536	14049	7	7	-0.674671	NA
chr19	31457531	31457570	3	40	hyper	ENSG00000268953	AC020952.1	182810	7	7	NA	NA
chr19	33754043	33754162	4	120	hypo	ENSG00000130876	SLC7A10	37345	7	7	-4.27799	2.78145e-06
chr19	34430199	34430299	3	101	hypo	ENSG00000153885	KCTD15	143411	7	7	-3.04503	1.89136e-17
chr19	35480226	35480662	7	437	hypo	ENSG00000089351	GRAMD1A	5242	4	3	3.79145	2.78468e-31
chr19	35481688	35481961	8	274	hypo	ENSG00000089351	GRAMD1A	3862	4	4	3.79145	2.78468e-31
chr19	35633238	35633258	3	21	hypo	ENSG00000266964	FXYD1	3536	2	5	-3.0867	0.0675162
chr19	36138560	36138631	8	72	hypo	ENSG00000126267	COX6B1	528	7	7	-1.10085	6.20543e-06
chr19	36295150	36295192	4	43	hyper	ENSG00000250799	PRODH2	4279	7	7	0.206167	NA
chr19	36555876	36556051	3	176	hypo	ENSG00000075702	WDR62	10180	4	5	-0.348297	0.198331
chr19	36698957	36699174	3	218	hypo	ENSG00000196357	ZNF565	25869	7	4	0.170835	0.514342
chr19	36762942	36763077	8	136	hyper	ENSG00000196357	ZNF565	25849	7	7	0.170835	0.514342
chr19	37463627	37463660	3	34	hyper	ENSG00000198453	ZNF568	56412	7	2	-0.622404	0.00514525
chr19	37651714	37651839	5	126	hypo	ENSG00000267360	CTC-454I21.3	4543	7	7	-0.406825	0.866394
chr19	37861426	37861452	4	27	hypo	ENSG00000189164	ZNF527	620	1	1	-0.9957	2.048e-06
chr19	38536678	38536709	3	32	hypo	ENSG00000105738	SIPA1L3	138825	4	4	-0.162164	0.700609
chr19	39511775	39512243	4	469	hypo	ENSG00000161243	FBXO27	11415	5	5	0.844613	0.00719424
chr19	39756684	39756709	3	26	hyper	ENSG00000183709	IFNL2	2456	7	7	6.89668	5.59942e-06
chr19	39908514	39908557	7	44	hyper	ENSG00000090924	PLEKHG2	5310	5	5	2.68484	1.90998e-07
chr19	40377897	40377917	3	21	hyper	ENSG00000090920	FCGBP	23944	7	7	-0.131989	0.802807
chr19	41083458	41083492	3	35	hypo	ENSG00000160410	SHKBP1	718	3	1	-0.168255	0.453489
chr19	41316584	41316614	3	31	hypo	ENSG00000268797	CTC-490E21.12	9397	7	7	0.0435265	NA
chr19	41899684	41899753	5	70	hyper	ENSG00000077348	EXOSC5	7439	6	7	-3.02837	1.03974e-20
chr19	42385988	42386132	4	145	hyper	ENSG00000076928	ARHGEF1	1166	7	7	-0.77914	1.71126e-06
chr19	42436647	42436728	4	82	hyper	ENSG00000105404	RABAC1	26854	7	7	-0.349007	0.383426
chr19	42712036	42712053	3	18	hyper	ENSG00000160570	DEDD2	9279	3	3	0.0423674	0.887283
chr19	43656621	43656854	3	234	hypo	ENSG00000204941	PSG5	33950	7	7	0.161514	0.931948
chr19	43970034	43970081	3	48	hypo	ENSG00000124466	LYPD3	244	4	2	2.67684	2.12999e-32
chr19	44231470	44231550	3	81	hypo	ENSG00000124449	IRGC	11348	5	5	2.69435	NA
chr19	44559829	44559853	3	25	hyper	ENSG00000178386	ZNF223	3679	6	7	-0.882557	0.00105711
chr19	45143910	45144643	6	734	hypo	ENSG00000073008	PVR	2820	7	3	2.60573	9.40522e-15
chr19	45260278	45260319	3	42	hyper	ENSG00000069399	BCL3	8494	5	3	2.25163	2.53934e-23
chr19	45450134	45450183	3	50	hyper	ENSG00000234906	APOC2	915	7	4	-0.557209	0.386904
chr19	45457597	45457637	5	41	hypo	ENSG00000104853	CLPTM1	229	3	3	0.428507	0.00815141
chr19	45491622	45491778	7	157	hypo	ENSG00000104853	CLPTM1	33852	5	4	0.428507	0.00815141
chr19	45523542	45523670	3	129	hyper	ENSG00000104856	RELB	18918	7	6	2.31133	9.55914e-24
chr19	45888665	45888695	3	31	hyper	ENSG00000104881	PPP1R13L	5784	5	7	-0.261251	0.361807
chr19	46975044	46975062	4	19	hyper	ENSG00000182013	PNMAL1	232	2	3	-1.90754	0.00433289
chr19	47080342	47080441	3	100	hypo	ENSG00000268423	AC011551.3	30078	7	7	0.0992996	0.925822
chr19	47552375	47552386	3	12	hyper	ENSG00000130748	TMEM160	491	7	7	-1.11522	6.60721e-05
chr19	47714463	47714514	3	52	hypo	ENSG00000105327	BBC3	21534	7	6	-0.542156	0.0628017
chr19	48876231	48876376	3	146	hypo	ENSG00000105467	SYNGR4	8651	7	7	-0.866456	0.512245
chr19	49359502	49359578	4	77	hyper	ENSG00000105559	PLEKHA4	19186	7	7	-1.29811	0.000193765
chr19	49432882	49432942	4	61	hyper	ENSG00000104808	DHDH	4025	7	7	-1.28531	0.00336818
chr19	49436443	49436474	3	32	hypo	ENSG00000104808	DHDH	479	3	3	-1.28531	0.00336818
chr19	49924031	49924222	3	192	hypo	ENSG00000142538	PTH2	2571	5	7	NA	NA
chr19	50397330	50397467	5	138	hypo	ENSG00000104951	IL4I1	4487	2	1	3.33278	5.71791e-21
chr19	50920137	50920289	4	153	hypo	ENSG00000142539	CTD-2545M3.6	1157	5	4	NA	NA
chr19	51612493	51612529	3	37	hyper	ENSG00000142544	CTU1	883	7	7	-1.12851	9.88429e-05
chr19	53017221	53017323	4	103	hypo	ENSG00000198482	ZNF808	13631	7	7	0.014783	0.969212
chr19	53700878	53700988	5	111	hypo	ENSG00000197497	ZNF665	4305	1	1	0.393508	0.200007
chr19	53872775	53872930	4	156	hypo	ENSG00000203326	ZNF525	3906	7	7	0.850063	1.62834e-05
chr19	54250053	54250104	3	52	hypo	ENSG00000142405	NLRP12	77569	7	7	0.161728	0.623639
chr19	54445137	54445239	3	103	hyper	ENSG00000105605	CACNG7	32599	7	7	0.976021	NA
chr19	54931874	54931918	3	45	hypo	ENSG00000167614	TTYH1	5503	7	5	-0.633889	0.00939577
chr19	55609270	55609292	3	23	hyper	ENSG00000125503	PPP1R12C	7000	5	3	-0.66214	0.00221187
chr19	55843497	55843687	4	191	hyper	ENSG00000180061	TMEM150B	6883	7	7	-0.089136	0.781356
chr19	55863505	55863550	4	46	hyper	ENSG00000160471	COX6B2	2457	7	7	0.2454	0.668869
chr19	56880271	56880289	4	19	hyper	ENSG00000131848	ZSCAN5A	527	3	3	-0.81677	5.94737e-05
chr19	57049382	57049465	4	84	hypo	ENSG00000196867	ZFP28	892	1	1	0.572131	0.0216313
chr19	57684204	57684216	3	13	hypo	ENSG00000258873	DUXA	5398	2	2	-2.80433	NA
chr19	58330311	58330368	3	58	hypo	ENSG00000268750	CTD-2583A14.10	746	7	7	NA	NA
chr19	58822257	58822286	4	30	hyper	ENSG00000267216	AC010642.1	31939	6	7	0.37528	0.483202
chr19	58885829	58885921	3	93	hyper	ENSG00000152475	ZNF837	6885	7	7	-0.658513	0.0397363
chr19	59057254	59057389	4	136	hyper	ENSG00000130726	TRIM28	1863	1	1	-0.773333	0.000811439
chr2	529256	529516	3	261	hyper	ENSG00000151353	TMEM18	148052	7	7	0.0497731	0.820456
chr2	947711	947834	3	124	hypo	ENSG00000172554	SNTG2	1218	7	7	-0.313066	0.716716
chr2	3226981	3227256	6	276	hypo	ENSG00000032389	TSSC1	34422	5	4	-0.843578	7.69738e-06
chr2	7474272	7474313	4	42	hypo	ENSG00000151692	RNF144A	416769	7	7	1.28013	6.14813e-10
chr2	7576416	7576889	7	474	hypo	ENSG00000151692	RNF144A	519129	7	4	1.28013	6.14813e-10
chr2	7749892	7750013	4	122	hypo	ENSG00000151692	RNF144A	692429	7	7	1.28013	6.14813e-10
chr2	8388611	8388810	6	200	hypo	ENSG00000115738	ID2	430263	4	4	4.48559	4.09435e-18
chr2	8391281	8391458	4	178	hypo	ENSG00000115738	ID2	427604	4	4	4.48559	4.09435e-18
chr2	8549000	8549088	5	89	hypo	ENSG00000115738	ID2	269929	4	4	4.48559	4.09435e-18
chr2	8654946	8655330	5	385	hypo	ENSG00000115738	ID2	163835	4	4	4.48559	4.09435e-18
chr2	8659073	8659553	5	481	hypo	ENSG00000115738	ID2	159660	4	4	4.48559	4.09435e-18
chr2	8804640	8804917	5	278	hyper	ENSG00000115738	ID2	14195	7	7	4.48559	4.09435e-18
chr2	8915457	8915562	4	106	hypo	ENSG00000134313	KIDINS220	46450	5	4	0.569634	0.0632227
chr2	10130253	10130578	5	326	hypo	ENSG00000134317	GRHL1	45074	4	4	2.35942	9.83395e-22
chr2	10374838	10374901	4	64	hyper	ENSG00000115756	HPCAL1	68144	7	7	-1.64042	1.57149e-10
chr2	10848057	10848134	4	78	hypo	ENSG00000143882	ATP6V1C2	13678	7	7	-0.0126608	0.977187
chr2	10972861	10973003	4	143	hyper	ENSG00000143870	PDIA6	48945	7	7	-0.836371	0.00354664
chr2	11021170	11021200	3	31	hypo	ENSG00000162975	KCNF1	30876	3	1	-1.86338	NA
chr2	11342425	11342496	3	72	hypo	ENSG00000134318	ROCK2	22573	6	4	1.48983	2.22282e-09
chr2	12159041	12159150	3	110	hypo	ENSG00000134324	LPIN1	341374	7	7	-0.29675	0.103616
chr2	13816344	13816495	3	152	hyper	ENSG00000162981	FAM84A	956389	7	7	2.00133	NA
chr2	15984386	15984502	3	117	hyper	ENSG00000134323	MYCN	96240	7	7	0.469425	0.419193
chr2	16228331	16228441	3	111	hyper	ENSG00000134323	MYCN	147700	7	7	0.469425	0.419193
chr2	16833860	16834043	6	184	hypo	ENSG00000197872	FAM49A	88659	4	3	2.42499	3.41142e-33
chr2	18562273	18562448	3	176	hyper	ENSG00000240857	RDH14	179585	4	5	0.478363	0.0737111
chr2	18716650	18716904	3	255	hypo	ENSG00000240857	RDH14	25168	7	7	0.478363	0.0737111
chr2	19286187	19286267	3	81	hyper	ENSG00000143867	OSR1	272186	7	7	-0.0941082	NA
chr2	20223525	20224078	5	554	hypo	ENSG00000132031	MATN3	11345	4	3	3.3887	0.0121229
chr2	20792007	20792124	7	118	hyper	ENSG00000118960	HS1BP3	58783	5	5	-0.188676	0.388185
chr2	23572941	23573106	3	166	hypo	ENSG00000119771	KLHL29	35063	7	7	0.254149	0.547644
chr2	24232541	24232603	5	63	hyper	ENSG00000205639	MFSD2B	377	7	2	-0.65189	0.0472844
chr2	25096697	25096768	5	72	hyper	ENSG00000138031	ADCY3	54694	7	5	-0.763333	0.0107309
chr2	25161610	25161688	3	79	hyper	ENSG00000138031	ADCY3	18940	7	7	-0.763333	0.0107309
chr2	25220261	25220340	4	80	hypo	ENSG00000115137	DNAJC27	25336	7	7	0.0946421	0.814973
chr2	25627377	25627451	3	75	hyper	ENSG00000138101	DTNB	27302	7	7	-0.899944	0.0120219
chr2	26831525	26831685	5	161	hypo	ENSG00000157884	CIB4	27535	7	7	NA	NA
chr2	27098012	27098147	3	136	hypo	ENSG00000157851	DPYSL5	27464	5	5	-0.0678505	0.937097
chr2	27110714	27110807	3	94	hyper	ENSG00000157851	DPYSL5	40145	5	5	-0.0678505	0.937097
chr2	27346888	27346959	4	72	hyper	ENSG00000143994	ABHD1	232	7	2	-1.12791	0.170528
chr2	27358684	27358798	3	115	hypo	ENSG00000138073	PREB	1197	7	4	-0.714841	0.000262828
chr2	27398580	27398604	4	25	hyper	ENSG00000163792	TCF23	26720	7	7	NA	NA
chr2	27436068	27436132	4	65	hyper	ENSG00000138085	ATRAID	1205	3	1	-0.582771	0.00139434
chr2	28655427	28655500	3	74	hypo	ENSG00000163803	PLB1	24547	1	3	-2.40281	2.79457e-18
chr2	28703318	28703437	3	120	hyper	ENSG00000163803	PLB1	23365	7	7	-2.40281	2.79457e-18
chr2	29033039	29033100	4	62	hypo	ENSG00000163806	SPDYA	614	2	3	0.610876	0.0484756
chr2	29541191	29541299	4	109	hyper	ENSG00000171094	ALK	125605	3	5	0.330343	0.781598
chr2	29577136	29577174	3	39	hyper	ENSG00000171094	ALK	161515	7	7	0.330343	0.781598
chr2	30238072	30238119	3	48	hyper	ENSG00000171094	ALK	93662	7	7	0.330343	0.781598
chr2	30359813	30359848	3	36	hypo	ENSG00000119801	YPEL5	9975	7	7	2.82128	8.57047e-42
chr2	30372744	30372817	3	74	hypo	ENSG00000119801	YPEL5	2973	3	1	2.82128	8.57047e-42
chr2	30446558	30446790	4	233	hyper	ENSG00000213626	LBH	7721	5	5	0.383269	0.510832
chr2	30806495	30806809	3	315	hyper	ENSG00000172954	LCLAT1	136560	7	7	-0.60965	0.0124305
chr2	32785114	32785401	3	288	hypo	ENSG00000115760	BIRC6	203161	6	6	0.693598	0.0232968
chr2	33756408	33756796	8	389	hypo	ENSG00000152689	RASGRP3	95211	5	3	0.300984	0.214815
chr2	35620413	35620623	4	211	hyper	ENSG00000150938	CRIM1	962549	7	7	2.31294	3.14403e-07
chr2	36831892	36831898	3	7	hyper	ENSG00000171055	FEZ2	49064	7	7	-0.711633	0.00034043
chr2	37117112	37117174	3	63	hyper	ENSG00000115808	STRN	46360	5	5	0.431819	0.197143
chr2	37593885	37594079	6	195	hyper	ENSG00000115828	QPCT	22265	5	5	-0.653816	0.148968
chr2	37760781	37761026	4	246	hyper	ENSG00000115828	QPCT	189186	7	7	-0.653816	0.148968
chr2	38605245	38605337	3	93	hyper	ENSG00000119787	ATL2	863	7	7	0.290953	0.225788
chr2	38763683	38763697	3	15	hyper	ENSG00000143889	HNRNPLL	66487	1	2	-0.791552	2.8854e-05
chr2	44353240	44353549	3	310	hyper	ENSG00000138032	PPM1B	41712	7	7	1.1747	7.02908e-06
chr2	44518635	44518930	5	296	hyper	ENSG00000138079	SLC3A1	16183	5	5	0.511095	0.150245
chr2	46523549	46523577	4	29	hyper	ENSG00000116016	EPAS1	182	3	5	-0.913128	0.0328843
chr2	46636133	46636200	4	68	hyper	ENSG00000187600	TMEM247	70557	7	7	NA	NA
chr2	46861432	46861759	4	328	hypo	ENSG00000119878	CRIPT	17305	7	7	0.462763	0.0267502
chr2	47229955	47230193	5	239	hyper	ENSG00000068724	TTC7A	86778	5	5	-1.73172	5.9867e-09
chr2	47406784	47406858	3	75	hyper	ENSG00000143933	CALM2	3080	7	7	0.872515	1.1899e-05
chr2	47428232	47428517	3	286	hypo	ENSG00000143933	CALM2	24633	4	4	0.872515	1.1899e-05
chr2	48338208	48338217	3	10	hyper	ENSG00000170802	FOXN2	203562	4	3	2.06522	1.45461e-14
chr2	54749916	54749983	3	68	hyper	ENSG00000115306	SPTBN1	66527	7	7	0.761678	0.0105895
chr2	54857174	54857270	4	97	hypo	ENSG00000115306	SPTBN1	173800	6	5	0.761678	0.0105895
chr2	58259373	58259697	3	325	hyper	ENSG00000028116	VRK2	124749	4	4	0.968272	7.6629e-07
chr2	60715593	60715868	3	276	hypo	ENSG00000119866	BCL11A	37428	7	4	1.61502	5.73385e-08
chr2	61083576	61083779	3	204	hypo	ENSG00000162924	REL	24977	4	3	4.92983	1.08829e-27
chr2	61393555	61393828	4	274	hyper	ENSG00000173209	AHSA2	10860	5	5	-0.318049	0.0771007
chr2	61927791	61927835	3	45	hypo	ENSG00000170264	FAM161A	153464	7	7	0.0867771	0.822106
chr2	61928136	61928207	3	72	hypo	ENSG00000170264	FAM161A	153106	7	7	0.0867771	0.822106
chr2	62683985	62684036	3	52	hyper	ENSG00000186889	TMEM17	49465	2	2	-0.0812953	0.841505
chr2	64552998	64553381	5	384	hypo	ENSG00000119862	LGALSL	127912	5	4	0.355861	0.598185
chr2	65521133	65521487	8	355	hypo	ENSG00000138071	ACTR2	66423	7	3	0.0626636	0.85137
chr2	65644915	65645014	3	100	hypo	ENSG00000198369	SPRED2	83201	6	1	4.18261	3.70726e-23
chr2	68518104	68518291	4	188	hyper	ENSG00000119865	CNRIP1	28940	4	5	-1.10397	0.000565091
chr2	68585293	68585614	5	322	hyper	ENSG00000115956	PLEK	6850	5	5	1.94231	5.53994e-16
chr2	68966727	68966853	4	127	hypo	ENSG00000163219	ARHGAP25	60057	3	3	0.758	0.00012753
chr2	69664991	69665132	3	142	hypo	ENSG00000169599	NFU1	300	3	3	0.211913	0.285853
chr2	70175826	70175868	4	43	hyper	ENSG00000244617	ASPRV1	13549	7	7	-0.908766	0.0107687
chr2	70342852	70342901	3	50	hyper	ENSG00000169564	PCBP1	28291	4	3	0.722525	1.66277e-06
chr2	70368312	70368460	4	149	hypo	ENSG00000115998	C2orf42	49816	3	3	0.187204	0.336523
chr2	70395709	70395777	3	69	hypo	ENSG00000115998	C2orf42	18731	6	6	0.187204	0.336523
chr2	70745304	70745822	6	519	hypo	ENSG00000163235	TGFA	71151	4	3	3.51216	3.4265e-20
chr2	73181675	73181926	7	252	hyper	ENSG00000144040	SFXN5	12635	5	5	-1.29828	3.46554e-07
chr2	74374198	74374279	4	82	hypo	ENSG00000163170	BOLA3	11713	3	3	-0.731719	0.00263281
chr2	74532060	74532107	3	48	hypo	ENSG00000188687	SLC4A5	19171	7	7	1.33893	5.18165e-08
chr2	74704393	74704566	4	174	hyper	ENSG00000135637	CCDC142	3562	5	5	-0.515607	0.00238825
chr2	83065084	83065254	3	171	hyper	ENSG00000163541	SUCLG1	1621434	7	7	-0.722144	0.000610321
chr2	85186394	85186642	4	249	hyper	ENSG00000176407	KCMF1	11696	5	5	0.226914	0.207221
chr2	85513036	85513112	4	77	hypo	ENSG00000152284	TCF7L1	152541	7	7	0.471875	0.323997
chr2	85545784	85546134	5	351	hypo	ENSG00000152291	TGOLN2	812	7	5	-0.403228	0.0907977
chr2	86038234	86038325	5	92	hypo	ENSG00000168874	ATOH8	57262	7	7	3.11623	0.000184556
chr2	86067277	86067398	3	122	hyper	ENSG00000115525	ST3GAL5	1070	5	5	0.899508	0.000462862
chr2	86190919	86191106	3	188	hyper	ENSG00000115525	ST3GAL5	74874	7	7	0.899508	0.000462862
chr2	86464456	86464542	3	87	hypo	ENSG00000068615	REEP1	23377	7	7	0.622158	0.481779
chr2	86595154	86595226	3	73	hyper	ENSG00000068615	REEP1	29983	5	7	0.622158	0.481779
chr2	86952758	86952765	3	8	hyper	ENSG00000153561	RMND5A	5465	7	7	0.10009	0.750887
chr2	87034305	87034422	4	118	hypo	ENSG00000153563	CD8A	22634	7	7	1.19784	7.48471e-07
chr2	87059181	87059339	3	159	hyper	ENSG00000172116	CD8B	16798	7	7	0.587986	0.418376
chr2	87883528	87883563	4	36	hypo	ENSG00000125551	PLGLB2	164059	7	7	0.31406	NA
chr2	88649898	88649955	7	58	hypo	ENSG00000172073	TEX37	174241	7	7	NA	NA
chr2	89448876	89448964	3	89	hyper	ENSG00000239951	IGKV3-20	6276	7	7	1.07886	0.0690345
chr2	95681368	95681424	4	57	hyper	ENSG00000172005	MAL	10031	2	5	0.288464	0.401655
chr2	96852799	96852995	4	197	hyper	ENSG00000084090	STARD7	21665	5	5	0.118304	0.613625
chr2	97171137	97171293	4	157	hypo	ENSG00000196843	ARID5A	31269	4	3	1.24755	9.12658e-06
chr2	97341994	97342190	3	197	hyper	ENSG00000114982	KANSL3	33567	7	4	1.7414	2.82892e-25
chr2	97435656	97435833	4	178	hyper	ENSG00000158158	CNNM4	9105	5	5	1.15739	9.94815e-06
chr2	97547272	97547687	5	416	hypo	ENSG00000168754	FAM178B	5859	5	5	0.974167	0.189626
chr2	98164447	98164532	3	86	hyper	ENSG00000135940	COX5B	98012	7	7	-1.45344	4.81203e-09
chr2	98273405	98273607	4	203	hypo	ENSG00000115073	ACTR1B	1075	5	5	-0.498657	0.000332785
chr2	98289152	98289322	3	171	hyper	ENSG00000115073	ACTR1B	8666	7	7	-0.498657	0.000332785
chr2	99029070	99029185	3	116	hypo	ENSG00000040933	INPP4A	32188	7	7	-0.783343	0.0217146
chr2	99606019	99606036	3	18	hyper	ENSG00000196872	KIAA1211L	53304	7	7	-4.80974	1.66929e-15
chr2	99718455	99718631	4	177	hyper	ENSG00000135951	TSGA10	104819	7	7	-0.445097	0.223958
chr2	100755127	100755355	4	229	hypo	ENSG00000144218	AFF3	131442	7	7	-0.112554	0.891286
chr2	101011804	101012089	12	286	hypo	ENSG00000115526	CHST10	3619	7	4	1.97699	1.19554e-07
chr2	101036465	101036605	3	141	hyper	ENSG00000115526	CHST10	2416	5	5	1.97699	1.19554e-07
chr2	101206874	101207015	3	142	hypo	ENSG00000115539	PDCL3	27792	7	7	1.41186	0.000251325
chr2	101996822	101996908	4	87	hyper	ENSG00000175874	CREG2	34852	5	5	0.40733	0.377098
chr2	102187566	102187572	3	7	hypo	ENSG00000196460	RFX8	96403	7	7	4.6747	0.00127179
chr2	102246790	102247002	8	213	hypo	ENSG00000071054	MAP4K4	66414	5	4	3.1394	9.91493e-21
chr2	102254700	102254767	3	68	hypo	ENSG00000071054	MAP4K4	58577	4	4	3.1394	9.91493e-21
chr2	102364910	102365077	4	168	hyper	ENSG00000071054	MAP4K4	51681	3	3	3.1394	9.91493e-21
chr2	106402781	106402930	4	150	hypo	ENSG00000071051	NCK2	41501	5	5	3.10562	2.56506e-19
chr2	106480856	106480950	3	95	hypo	ENSG00000071051	NCK2	119549	7	4	3.10562	2.56506e-19
chr2	106785018	106785296	4	279	hyper	ENSG00000115652	UXS1	75398	5	4	1.19258	9.86084e-12
chr2	106997459	106997482	3	24	hyper	ENSG00000153165	RGPD3	87361	7	7	2.21126	0.0216791
chr2	108553191	108553434	3	244	hyper	ENSG00000115665	SLC5A7	49665	7	7	NA	NA
chr2	110265400	110265640	5	241	hyper	ENSG00000186522	2015-09-10	106262	7	7	0.767458	0.00446799
chr2	110315648	110315927	4	280	hyper	ENSG00000186522	2015-09-10	15228	7	4	0.767458	0.00446799
chr2	111933177	111933317	3	141	hypo	ENSG00000153094	BCL2L11	56292	5	5	1.80324	5.15121e-06
chr2	112060570	112060640	3	71	hyper	ENSG00000153094	BCL2L11	183650	7	7	1.80324	5.15121e-06
chr2	112188574	112188885	3	312	hyper	ENSG00000153094	BCL2L11	311774	7	7	1.80324	5.15121e-06
chr2	112280012	112280307	3	296	hypo	ENSG00000153107	ANAPC1	362107	5	4	-0.0987596	0.682902
chr2	114025027	114025250	3	224	hypo	ENSG00000125618	PAX8	51564	5	7	0.708199	0.00850261
chr2	114769434	114769576	3	143	hyper	ENSG00000115091	ACTR3	121968	5	5	0.377736	0.138409
chr2	120239785	120240049	7	265	hypo	ENSG00000080293	SCTR	42498	5	5	-5.94565	0.00303626
chr2	121060410	121060497	7	88	hyper	ENSG00000163083	INHBB	43264	6	6	1.39344	0.181729
chr2	121499839	121499893	3	55	hyper	ENSG00000074047	GLI2	6043	7	7	-0.0410708	0.98497
chr2	121747371	121747529	4	159	hypo	ENSG00000074047	GLI2	253627	7	7	-0.0410708	0.98497
chr2	122130471	122130899	7	429	hypo	ENSG00000074054	CLASP1	35333	5	4	0.553142	0.0211697
chr2	122281450	122281672	4	223	hypo	ENSG00000074054	CLASP1	186209	6	6	0.553142	0.0211697
chr2	122312068	122312138	3	71	hypo	ENSG00000074054	CLASP1	216751	5	5	0.553142	0.0211697
chr2	122568545	122568630	3	86	hypo	ENSG00000211460	TSN	73908	7	7	-0.483087	0.00162814
chr2	123641089	123641354	3	266	hyper	ENSG00000155052	CNTNAP5	1141641	7	7	3.56699	NA
chr2	124610500	124610844	3	345	hypo	ENSG00000155052	CNTNAP5	172190	7	7	3.56699	NA
chr2	127471441	127471880	4	440	hyper	ENSG00000136732	GYPC	58151	5	5	2.22756	4.15218e-12
chr2	127477517	127477645	3	129	hypo	ENSG00000136732	GYPC	64072	5	7	2.22756	4.15218e-12
chr2	127729016	127729097	3	82	hypo	ENSG00000237524	AC114783.1	72584	2	2	-0.642232	NA
chr2	127928790	127929004	3	215	hypo	ENSG00000186684	CYP27C1	48756	5	7	0.0064072	0.992077
chr2	127955507	127955790	9	284	hyper	ENSG00000186684	CYP27C1	11662	7	7	0.0064072	0.992077
chr2	128557934	128558083	4	150	hypo	ENSG00000136709	WDR33	73782	7	4	0.688383	7.76814e-05
chr2	129348810	129348881	4	72	hyper	ENSG00000136720	HS6ST1	272693	7	7	0.29068	0.396997
chr2	129365295	129365332	3	38	hypo	ENSG00000136720	HS6ST1	289161	7	7	0.29068	0.396997
chr2	129393233	129393374	3	142	hyper	ENSG00000136720	HS6ST1	317151	5	5	0.29068	0.396997
chr2	129430248	129430266	3	19	hypo	ENSG00000136720	HS6ST1	354105	7	7	0.29068	0.396997
chr2	129510245	129510271	3	27	hypo	ENSG00000136720	HS6ST1	434106	5	5	0.29068	0.396997
chr2	130902884	130902921	4	38	hyper	ENSG00000152076	CCDC74B	194	7	7	-2.22975	0.390867
chr2	132414835	132414857	3	23	hypo	ENSG00000197927	C2orf27A	65100	7	7	-0.819609	0.204998
chr2	135034988	135035017	4	30	hyper	ENSG00000152127	MGAT5	157249	6	6	-0.542248	0.0222388
chr2	136583275	136583481	5	207	hyper	ENSG00000115850	LCT	37968	7	7	-1.4788	0.613671
chr2	137067689	137067953	5	265	hypo	ENSG00000121966	CXCR4	192085	4	4	4.16238	1.39423e-36
chr2	138739074	138739132	3	59	hypo	ENSG00000150540	HNMT	17513	5	4	-1.37123	9.07632e-05
chr2	144253520	144253814	5	295	hypo	ENSG00000075884	ARHGAP15	404736	7	7	-2.09377	1.26549e-19
chr2	146870520	146870543	3	24	hyper	ENSG00000169554	ZEB2	1591909	7	7	0.113967	0.805989
chr2	148657391	148657673	3	283	hypo	ENSG00000121989	ACVR2A	55446	5	3	1.23324	1.73543e-06
chr2	152045799	152045803	3	5	hyper	ENSG00000184898	RBM43	72591	7	7	0.871809	0.0228888
chr2	152163031	152163155	4	125	hyper	ENSG00000123609	NMI	16521	7	7	0.509207	0.0472445
chr2	153080416	153080798	3	383	hypo	ENSG00000115145	STAM2	48100	5	5	0.280294	0.307526
chr2	158233374	158233491	4	118	hypo	ENSG00000136541	ERMN	49206	7	7	0.863141	2.18305e-05
chr2	159610479	159610678	3	200	hyper	ENSG00000163331	DAPL1	41249	5	2	-1.95298	0.347143
chr2	159757760	159758010	3	251	hyper	ENSG00000115183	TANC1	67259	7	7	1.92733	9.1853e-06
chr2	161064005	161064190	4	186	hypo	ENSG00000115221	ITGB6	7281	4	3	2.28225	0.000652867
chr2	161125816	161125934	3	119	hypo	ENSG00000115221	ITGB6	69059	4	3	2.28225	0.000652867
chr2	161127019	161127052	3	34	hypo	ENSG00000115221	ITGB6	70219	4	3	2.28225	0.000652867
chr2	162197826	162197845	6	20	hyper	ENSG00000115233	PSMD14	33286	7	7	0.254315	0.263979
chr2	163027484	163027569	4	86	hyper	ENSG00000078098	FAP	326	7	7	3.35649	4.7705e-06
chr2	166468344	166468477	3	134	hypo	ENSG00000178662	CSRNP3	142253	7	7	-2.26068	NA
chr2	169261362	169261705	3	344	hypo	ENSG00000172292	CERS6	50837	2	3	2.55759	6.88863e-15
chr2	169543192	169543296	3	105	hyper	ENSG00000172292	CERS6	230872	5	5	2.55759	6.88863e-15
chr2	170604998	170605139	3	142	hypo	ENSG00000213160	KLHL23	54070	7	7	0.877381	0.0147265
chr2	173033703	173033806	3	104	hyper	ENSG00000115844	DLX2	66125	7	7	0.269736	0.928698
chr2	173419622	173419736	3	115	hypo	ENSG00000152256	PDK1	420	5	3	0.707621	0.00936901
chr2	173507269	173507491	4	223	hypo	ENSG00000152256	PDK1	87279	5	7	0.707621	0.00936901
chr2	173966251	173966753	4	503	hypo	ENSG00000091436	MLTK	26339	7	4	0.398485	0.260664
chr2	174153442	174153507	3	66	hyper	ENSG00000144354	CDCA7	66072	5	5	0.203038	0.659856
chr2	174449639	174449915	3	277	hyper	ENSG00000144354	CDCA7	230229	7	7	0.203038	0.659856
chr2	175556014	175556591	4	578	hypo	ENSG00000115935	WIPF1	8674	5	4	0.859373	9.05249e-06
chr2	175573523	175573555	3	33	hyper	ENSG00000115935	WIPF1	25911	7	7	0.859373	9.05249e-06
chr2	178938329	178938677	3	349	hyper	ENSG00000128655	PDE11A	445706	5	5	0.486425	0.190719
chr2	179564949	179565075	3	127	hypo	ENSG00000155657	TTN	130516	7	7	2.69075	1.17751e-15
chr2	180990036	180990197	6	162	hypo	ENSG00000163510	CWC22	118275	7	7	0.0282883	0.907844
chr2	182030111	182030336	4	226	hypo	ENSG00000170035	UBE2E3	198248	5	4	-0.897577	2.05053e-05
chr2	191320435	191320453	3	19	hypo	ENSG00000151690	MFSD6	47363	4	7	-1.98641	8.69025e-09
chr2	191543211	191543671	4	461	hypo	ENSG00000138386	NAB1	31969	4	3	-0.147059	0.738223
chr2	191657391	191658420	11	1030	hypo	ENSG00000115419	GLS	87646	7	4	2.09931	1.55971e-13
chr2	191659124	191659420	5	297	hypo	ENSG00000115419	GLS	86279	5	4	2.09931	1.55971e-13
chr2	192301475	192301756	3	282	hyper	ENSG00000128641	MYO1B	191704	4	5	2.20821	0.00403338
chr2	196316500	196316554	3	55	hypo	ENSG00000196950	SLC39A10	124172	7	7	-0.798474	0.0345428
chr2	196460749	196461094	4	346	hyper	ENSG00000196950	SLC39A10	20220	4	4	-0.798474	0.0345428
chr2	196728045	196728211	3	167	hypo	ENSG00000118997	DNAH7	125701	5	5	1.01973	0.1301
chr2	197213322	197213554	3	233	hypo	ENSG00000138411	HECW2	5057	5	5	1.32456	0.00156589
chr2	197265062	197265222	3	161	hyper	ENSG00000138411	HECW2	56761	5	5	1.32456	0.00156589
chr2	197615177	197615354	3	178	hypo	ENSG00000119041	GTF3C3	49183	7	7	0.497352	0.0245683
chr2	198173898	198174109	3	212	hyper	ENSG00000065413	ANKRD44	183284	1	1	0.747473	0.032694
chr2	201202770	201202973	3	204	hypo	ENSG00000196141	SPATS2L	32267	5	7	-0.105847	0.805296
chr2	201796123	201796319	3	197	hypo	ENSG00000115942	ORC2	22525	7	4	0.140515	0.532016
chr2	201958612	201958770	5	159	hyper	ENSG00000003402	CFLAR	22134	2	2	2.94895	9.33393e-21
chr2	202023279	202023559	3	281	hyper	ENSG00000003402	CFLAR	42592	3	3	2.94895	9.33393e-21
chr2	203713490	203713620	4	131	hyper	ENSG00000163596	ICA1L	70933	4	4	-0.930305	0.000209242
chr2	204143563	204143731	4	169	hypo	ENSG00000119004	CYP20A1	39984	6	6	0.760665	4.07728e-08
chr2	205765127	205765400	3	274	hyper	ENSG00000116117	PARD3B	354747	7	7	1.94388	7.27116e-07
chr2	206599122	206599229	4	108	hyper	ENSG00000118257	NRP2	51951	7	6	4.53109	2.0895e-54
chr2	206612280	206612346	3	67	hypo	ENSG00000118257	NRP2	65089	6	5	4.53109	2.0895e-54
chr2	206616376	206616649	5	274	hypo	ENSG00000118257	NRP2	69288	5	3	4.53109	2.0895e-54
chr2	207905091	207905251	3	161	hypo	ENSG00000144410	CPO	100893	5	5	-0.531108	0.497983
chr2	208130180	208130494	3	315	hypo	ENSG00000118263	KLF7	98345	7	5	3.0401	6.43173e-13
chr2	208199055	208199465	11	411	hypo	ENSG00000118263	KLF7	167268	5	4	3.0401	6.43173e-13
chr2	208199687	208199843	5	157	hypo	ENSG00000118263	KLF7	167773	4	4	3.0401	6.43173e-13
chr2	208541684	208541770	3	87	hypo	ENSG00000163249	CCNYL1	34535	7	7	0.785911	7.14263e-05
chr2	208575403	208575413	4	11	hypo	ENSG00000163249	CCNYL1	854	1	1	0.785911	7.14263e-05
chr2	208666077	208666231	3	155	hyper	ENSG00000163251	FZD5	31866	5	7	0.484489	0.158775
chr2	208860673	208860866	3	194	hypo	ENSG00000178385	PLEKHM3	167742	5	4	3.15616	2.62146e-11
chr2	214022013	214022244	3	232	hypo	ENSG00000030419	IKZF2	4976	5	4	1.24998	6.13259e-05
chr2	214111490	214111645	3	156	hyper	ENSG00000144451	SPAG16	37544	7	7	0.946307	0.000536177
chr2	216780235	216780363	3	129	hypo	ENSG00000118242	MREG	118519	5	5	2.77422	3.99475e-16
chr2	218515754	218515894	4	141	hypo	ENSG00000231672	DIRC3	105453	7	7	-0.235534	0.510264
chr2	218620864	218621032	3	169	hypo	ENSG00000231672	DIRC3	52325	3	3	-0.235534	0.510264
chr2	218669890	218670084	6	195	hypo	ENSG00000231672	DIRC3	48708	4	4	-0.235534	0.510264
chr2	219162783	219162902	3	120	hyper	ENSG00000135926	TMBIM1	5532	5	7	-0.715393	0.00621535
chr2	219670478	219670543	3	66	hypo	ENSG00000135929	CYP27A1	24031	3	4	2.53249	2.65717e-09
chr2	219732980	219733006	3	27	hypo	ENSG00000115596	WNT6	8449	5	5	-0.397082	0.833318
chr2	219768387	219768633	3	247	hypo	ENSG00000135925	WNT10A	23425	7	7	1.13572	0.125465
chr2	219789348	219789697	3	350	hyper	ENSG00000171450	CDK5R2	34853	7	7	-0.675501	NA
chr2	223196957	223197049	4	93	hypo	ENSG00000135903	PAX3	33287	5	2	2.2093	NA
chr2	225260847	225261019	3	173	hypo	ENSG00000124019	FAM124B	5868	7	7	-1.81661	0.00505416
chr2	225607168	225607201	4	34	hyper	ENSG00000036257	CUL3	157073	7	7	0.284863	0.193287
chr2	225902739	225903147	5	409	hypo	ENSG00000135905	DOCK10	144678	3	1	0.829777	0.000270026
chr2	226879301	226879748	3	448	hypo	ENSG00000144460	NYAP2	614160	7	7	0.573311	0.288801
chr2	228523346	228523377	3	32	hyper	ENSG00000042304	C2orf83	25324	7	7	0.29093	0.650014
chr2	230136346	230136411	4	66	hypo	ENSG00000153823	PID1	376	7	7	-0.0628145	0.976184
chr2	231630778	231630925	3	148	hypo	ENSG00000135932	CAB39	53291	6	4	0.12068	0.706555
chr2	231673668	231674128	10	461	hypo	ENSG00000135932	CAB39	96338	5	4	0.12068	0.706555
chr2	231821540	231821576	3	37	hypo	ENSG00000135898	GPR55	46977	5	3	1.67369	0.000152065
chr2	231838909	231839255	7	347	hypo	ENSG00000135898	GPR55	13300	5	4	1.67369	0.000152065
chr2	233975621	233975923	3	303	hypo	ENSG00000168918	INPP5D	51095	6	6	-2.58787	1.54781e-13
chr2	234321781	234321918	3	138	hyper	ENSG00000077044	DGKD	58696	7	7	-1.17408	9.65839e-10
chr2	235895876	235896128	4	253	hypo	ENSG00000130147	SH3BP4	35385	7	7	-1.57506	2.62051e-08
chr2	236208765	236208773	3	9	hyper	ENSG00000157985	AGAP1	193962	7	7	-1.57579	1.26189e-07
chr2	238454635	238455076	3	442	hypo	ENSG00000071677	PRLH	20360	7	7	NA	NA
chr2	238456545	238456640	3	96	hyper	ENSG00000071677	PRLH	18623	7	7	NA	NA
chr2	238591578	238591696	4	119	hyper	ENSG00000124831	LRRFIP1	55418	5	5	0.341553	0.088371
chr2	238740177	238740341	3	165	hypo	ENSG00000177483	RBM44	32871	7	7	0.211344	0.576364
chr2	238809828	238810122	6	295	hypo	ENSG00000132329	RAMP1	42439	3	3	-0.00570738	0.989623
chr2	238832508	238832532	4	25	hyper	ENSG00000184182	UBE2F	42947	7	2	0.967443	2.01502e-05
chr2	238876970	238877023	4	54	hyper	ENSG00000258984	UBE2F-SCLY	1340	3	1	1.24618	0.0587001
chr2	239140537	239140610	5	74	hyper	ENSG00000186235	AC016757.3	254	7	7	-1.27538	1.78829e-06
chr2	241504215	241504290	3	76	hypo	ENSG00000144504	ANKMY1	32759	4	4	-0.536359	0.00375156
chr2	241562971	241563044	4	74	hyper	ENSG00000178623	GPR35	18159	4	5	-1.18879	0.021272
chr2	241645121	241645381	4	261	hyper	ENSG00000184945	AQP12A	13989	4	5	NA	NA
chr2	241687843	241687929	3	87	hyper	ENSG00000130294	KIF1A	34703	7	7	6.53838	1.03283e-17
chr2	242090564	242090620	3	57	hypo	ENSG00000115685	PPP1R7	1601	1	1	-1.88314	6.68768e-15
chr2	242174769	242174797	3	29	hypo	ENSG00000268485	AC104841.2	7464	6	6	NA	NA
chr2	242561504	242561522	4	19	hyper	ENSG00000176946	THAP4	37693	7	7	-0.869139	2.35035e-05
chr2	242819951	242820018	5	68	hyper	ENSG00000188011	CXXC11	8232	7	7	1.39919	NA
chr20	1935122	1935285	4	164	hyper	ENSG00000101327	PDYN	39528	7	7	-0.478581	0.717295
chr20	3309310	3309492	3	183	hyper	ENSG00000088854	C20orf194	79450	6	6	0.195497	0.423017
chr20	3387179	3387185	3	7	hypo	ENSG00000088854	C20orf194	157231	1	1	0.195497	0.423017
chr20	3824289	3824365	3	77	hypo	ENSG00000088888	MAVS	3158	5	6	-0.218985	0.582488
chr20	4754398	4754736	5	339	hypo	ENSG00000180259	PRNT	33252	4	4	NA	NA
chr20	5829391	5829745	6	355	hypo	ENSG00000089199	CHGB	62506	7	7	0.759214	0.0336559
chr20	7961049	7961467	5	419	hyper	ENSG00000125827	TMX4	3263	6	6	-1.48484	8.93336e-12
chr20	10607653	10607844	3	192	hyper	ENSG00000101384	JAG1	46945	4	4	-0.956294	0.00491656
chr20	12035407	12035458	3	52	hyper	ENSG00000132640	BTBD3	164061	7	7	-0.200205	0.506624
chr20	17614547	17614603	3	57	hyper	ENSG00000125844	RRBP1	20252	5	5	-0.108348	0.765687
chr20	19079525	19079788	4	264	hyper	ENSG00000185052	SLC24A3	113632	5	5	1.2649	9.41547e-05
chr20	19738764	19738776	3	13	hypo	ENSG00000268628	AL121761.2	90	1	1	-1.06473	NA
chr20	19804845	19804893	4	49	hyper	ENSG00000132669	RIN2	62294	5	5	-0.489615	0.238535
chr20	19942878	19942922	4	45	hyper	ENSG00000132669	RIN2	75735	7	7	-0.489615	0.238535
chr20	21709779	21709818	5	40	hypo	ENSG00000125813	PAX1	23501	7	7	NA	NA
chr20	22710497	22711151	10	655	hypo	ENSG00000125798	FOXA2	144730	7	4	NA	NA
chr20	23380447	23380508	3	62	hypo	ENSG00000125814	NAPB	25318	4	4	0.580928	0.00016391
chr20	23423585	23423745	4	161	hypo	ENSG00000125823	CSTL1	3343	7	5	-0.681684	0.577533
chr20	23597874	23598107	3	234	hyper	ENSG00000173335	CST9	11476	7	7	NA	NA
chr20	30304761	30305055	3	295	hypo	ENSG00000268457	AL160175.1	4091	3	1	3.13113	NA
chr20	30421306	30421383	4	78	hyper	ENSG00000101306	MYLK2	14233	7	7	-0.462435	NA
chr20	30467078	30467118	5	41	hypo	ENSG00000131044	TTLL9	8593	2	2	0.428288	0.472889
chr20	30758527	30758625	5	99	hyper	ENSG00000126003	PLAGL2	37017	7	7	1.43328	2.03766e-08
chr20	30945022	30945152	3	131	hypo	ENSG00000171456	ASXL1	1066	3	1	1.12836	4.74776e-07
chr20	30980329	30980396	6	68	hyper	ENSG00000171456	ASXL1	34207	7	6	1.12836	4.74776e-07
chr20	31889127	31889152	3	26	hypo	ENSG00000125999	BPIFB1	27853	7	7	0.325788	0.688298
chr20	32720996	32721015	3	20	hyper	ENSG00000125977	EIF2S2	20866	7	7	0.133116	0.652582
chr20	33113868	33113918	4	51	hyper	ENSG00000125971	DYNLRB1	9679	5	5	0.0708372	0.806115
chr20	33126555	33126790	5	236	hyper	ENSG00000125971	DYNLRB1	22458	6	6	0.0708372	0.806115
chr20	33647542	33647560	3	19	hyper	ENSG00000100991	TRPC4AP	57344	7	6	0.426498	0.00663562
chr20	35013577	35013736	3	160	hypo	ENSG00000080845	DLGAP4	119398	7	7	1.3047	3.77261e-05
chr20	35445664	35445847	4	184	hypo	ENSG00000149639	SOGA1	39910	6	6	-1.10237	0.00604933
chr20	35513853	35513956	5	104	hyper	ENSG00000101342	TLDC2	9380	5	5	-1.34715	1.3737e-06
chr20	36015572	36015609	3	38	hypo	ENSG00000197122	SRC	42502	5	5	0.988155	9.18627e-07
chr20	36428716	36428877	3	162	hyper	ENSG00000132792	CTNNBL1	106388	6	6	0.142203	0.580702
chr20	36509299	36509447	4	149	hyper	ENSG00000132821	VSTM2L	22124	7	7	0.556608	0.622621
chr20	36628576	36628652	4	77	hyper	ENSG00000101407	TTI1	17205	5	3	0.088202	0.695763
chr20	36915355	36915565	3	211	hyper	ENSG00000101425	BPI	26909	4	7	-2.9668	6.48662e-05
chr20	37075889	37075933	4	45	hyper	ENSG00000170471	RALGAPB	25546	1	1	0.596483	0.0100172
chr20	37163583	37163606	3	24	hypo	ENSG00000170471	RALGAPB	62135	6	6	0.596483	0.0100172
chr20	37428505	37428719	3	215	hypo	ENSG00000101445	PPP1R16B	5734	7	7	4.06244	4.79285e-18
chr20	39414090	39414332	3	243	hyper	ENSG00000204103	MAFB	96330	5	5	-4.0264	7.45907e-09
chr20	39860783	39860920	3	138	hypo	ENSG00000174306	ZHX3	50096	5	7	-2.60767	1.01453e-10
chr20	40133826	40134501	9	676	hypo	ENSG00000124177	CHD6	103422	5	1	1.69353	1.09231e-11
chr20	40401650	40401851	3	202	hyper	ENSG00000124177	CHD6	154616	7	7	1.69353	1.09231e-11
chr20	40618789	40619057	5	269	hypo	ENSG00000124177	CHD6	371789	7	7	1.69353	1.09231e-11
chr20	41975965	41976005	3	41	hypo	ENSG00000124193	SRSF6	110581	7	7	0.00747172	0.971462
chr20	42183041	42183288	3	248	hyper	ENSG00000101049	SGK2	4442	7	7	-1.89799	2.45248e-07
chr20	43972901	43972943	3	43	hyper	ENSG00000124145	SDC4	18994	5	3	1.94316	1.41358e-14
chr20	44741130	44741710	10	581	hypo	ENSG00000101017	CD40	5489	4	3	1.71482	2.35341e-12
chr20	44893506	44893561	8	56	hyper	ENSG00000149654	CDH22	90507	7	7	3.57605	NA
chr20	45040106	45040121	3	16	hyper	ENSG00000062598	ELMO2	44313	7	7	1.11587	0.000313306
chr20	45190851	45190916	3	66	hyper	ENSG00000149635	OCSTAMP	11669	5	5	0.0896487	0.904102
chr20	47013683	47013689	3	7	hyper	ENSG00000124126	PREX1	430733	7	7	-0.804108	0.00595289
chr20	47286814	47287168	9	355	hyper	ENSG00000124126	PREX1	46201	5	5	-0.804108	0.00595289
chr20	48489313	48489340	4	28	hypo	ENSG00000197818	SLC9A8	60076	6	6	0.887704	1.9363e-07
chr20	48645323	48645390	3	68	hyper	ENSG00000124216	SNAI1	45820	7	7	3.83656	1.93965e-20
chr20	48993465	48993661	6	197	hypo	ENSG00000196396	PTPN1	133326	7	7	2.84259	7.01771e-21
chr20	49145587	49145809	4	223	hyper	ENSG00000196396	PTPN1	18807	5	5	2.84259	7.01771e-21
chr20	50073400	50073430	3	31	hyper	ENSG00000101096	NFATC2	68252	4	5	-1.05681	0.000255867
chr20	50366841	50366953	4	113	hypo	ENSG00000054793	ATP9A	153844	5	7	0.557352	0.283812
chr20	50744456	50744715	3	260	hypo	ENSG00000020256	ZFP64	63939	4	4	-0.81794	4.68532e-05
chr20	51271247	51271563	3	317	hypo	ENSG00000182463	TSHZ2	317539	7	5	0.341332	0.508679
chr20	51900464	51900563	3	100	hyper	ENSG00000182463	TSHZ2	311567	7	7	0.341332	0.508679
chr20	52011553	52011838	3	286	hypo	ENSG00000182463	TSHZ2	422749	7	7	0.341332	0.508679
chr20	55026213	55026354	5	142	hyper	ENSG00000087589	CASS4	39115	6	6	0.566396	0.191193
chr20	56971719	56971912	3	194	hyper	ENSG00000124164	VAPB	7637	5	5	0.371197	0.0206426
chr20	57456563	57456577	3	15	hypo	ENSG00000087460	GNAS	41797	5	5	-0.306966	0.0446422
chr20	57581378	57581416	4	39	hyper	ENSG00000101160	CTSZ	11157	1	1	-0.0211723	0.953463
chr20	58031300	58031326	3	27	hyper	ENSG00000087495	PHACTR3	121249	7	7	-0.170128	0.893482
chr20	60596102	60596166	3	65	hypo	ENSG00000130699	TAF4	46280	7	4	-0.183335	0.511454
chr20	60819817	60819887	4	71	hypo	ENSG00000130703	OSBPL2	6272	6	6	0.0195929	0.936001
chr20	60848169	60848231	3	63	hyper	ENSG00000130703	OSBPL2	34620	5	5	0.0195929	0.936001
chr20	61765903	61765944	4	42	hypo	ENSG00000149658	YTHDF1	81662	7	7	-0.275322	0.0578206
chr20	61882803	61882842	3	40	hyper	ENSG00000101198	NKAIN4	10080	7	7	-1.76874	NA
chr20	62092566	62092617	4	52	hypo	ENSG00000075043	KCNQ2	55049	7	7	2.87188	0.243974
chr20	62180671	62180684	3	14	hyper	ENSG00000125508	SRMS	1819	7	7	0.642303	0.489699
chr20	62406345	62406351	3	7	hyper	ENSG00000130584	ZBTB46	30470	6	6	-0.103277	0.751083
chr20	62870390	62870826	8	437	hypo	ENSG00000203880	PCMTD2	16484	7	4	-0.401233	0.136126
chr21	16261521	16261844	5	324	hyper	ENSG00000180530	NRIP1	175638	7	4	2.42486	1.67092e-13
chr21	19003238	19003297	4	60	hyper	ENSG00000154640	BTG3	18001	7	7	2.77148	9.10617e-24
chr21	23811523	23811669	6	147	hypo	ENSG00000154654	NCAM2	1440963	7	7	0.889673	0.467335
chr21	27275825	27276157	5	333	hyper	ENSG00000142192	APP	22353	4	3	0.987628	0.0011644
chr21	29524987	29525243	4	257	hyper	ENSG00000156239	N6AMT1	732577	7	7	-0.0755088	0.784252
chr21	30670678	30670727	3	50	hyper	ENSG00000156273	BACH1	104310	3	1	1.0514	0.000187655
chr21	32598581	32598793	4	213	hypo	ENSG00000156299	TIAM1	107953	5	5	1.5684	1.89297e-09
chr21	32625281	32625555	3	275	hypo	ENSG00000156299	TIAM1	134684	6	3	1.5684	1.89297e-09
chr21	32710754	32711202	14	449	hypo	ENSG00000156299	TIAM1	220244	5	3	1.5684	1.89297e-09
chr21	32727160	32727533	5	374	hypo	ENSG00000156299	TIAM1	236612	5	4	1.5684	1.89297e-09
chr21	32994551	32994613	3	63	hyper	ENSG00000142168	SOD1	37351	7	7	0.0535003	0.883725
chr21	34472172	34472271	4	100	hypo	ENSG00000184221	OLIG1	29771	7	5	1.0333	0.0832626
chr21	34671796	34671947	3	152	hyper	ENSG00000142166	IFNAR1	24861	4	4	0.97336	0.000981459
chr21	34866292	34866540	4	249	hyper	ENSG00000177692	DNAJC28	2388	7	7	-1.49046	4.29236e-07
chr21	35234327	35234580	5	254	hypo	ENSG00000249209	AP000304.12	277460	7	7	-1.97792	NA
chr21	35387947	35388143	3	197	hypo	ENSG00000243927	MRPS6	57776	4	4	1.85479	0.00594326
chr21	36570068	36570763	5	696	hypo	ENSG00000159216	RUNX1	311072	7	4	0.687031	0.000723999
chr21	37477813	37477864	3	52	hyper	ENSG00000185917	SETD4	26150	7	7	-0.101729	0.669817
chr21	37796663	37796730	3	68	hyper	ENSG00000159259	CHAF1B	39020	4	5	-0.0806504	0.790939
chr21	38330600	38330619	3	20	hypo	ENSG00000159267	HLCS	207420	7	7	-0.117404	0.646106
chr21	40140537	40140783	4	247	hypo	ENSG00000157557	ETS2	36569	7	5	3.29621	4.52295e-09
chr21	40450304	40450654	3	351	hyper	ENSG00000183527	PSMG1	105297	5	5	-0.477577	0.0204749
chr21	40453810	40454056	3	247	hypo	ENSG00000183527	PSMG1	101843	4	3	-0.477577	0.0204749
chr21	40770164	40770228	4	65	hyper	ENSG00000182093	WRB	18026	5	5	0.30954	0.172706
chr21	42932056	42932173	6	118	hypo	ENSG00000184012	TMPRSS2	29070	4	4	0.446418	0.437799
chr21	43422798	43422994	6	197	hypo	ENSG00000173276	ZBTB21	14150	7	5	0.75587	0.00360103
chr21	43684098	43684134	3	37	hyper	ENSG00000160179	ABCG1	64317	5	5	-0.989503	0.000101774
chr21	43833796	43834048	3	253	hypo	ENSG00000160185	UBASH3A	9914	5	4	2.73588	1.45209e-06
chr21	43835234	43835277	4	44	hypo	ENSG00000160185	UBASH3A	11247	5	4	2.73588	1.45209e-06
chr21	44357039	44357096	3	58	hyper	ENSG00000160199	PKNOX1	37551	7	7	0.690481	1.45001e-05
chr21	44727004	44727494	17	491	hypo	ENSG00000142178	SIK1	119758	4	4	3.9386	9.88858e-24
[truncated: 1,276 more rows]
