# Supplementary material for: Bacterial infection remodels the DNA methylation landscape of human dendritic cells
Source: HighWire-hosted journal article supplement (doi:10.1101/gr.192005.115), 2015-09-21
Supplement: TableS3_Pyro-seq.xlsx [file TableS3_Pyro-seq.xlsx]

## Sheet: Sheet1
Supplementary Table 3: List of bisulfite pyrosequencing primers.
Gene locus	MTB-DMR direction	CpG site position and # within MTB-DMR	Forward primer (5'-3')	Reverse primer (5'-3')	Sequencing primer
CASP3	Hyper	Chr4:185534689 (#1)	AGGAGGGATTTGTTTAGATAGTG	AACTCCCATATCCACCTTTTCT	AGTTAATTAGATTTTTAAATTAAATTTG
		Chr4:185534708 (#2)
PACS2	Hyper	Chr14:105792519 (#1)	TAGTTGATTTTGTAGGAGGTATTGAT	ACAAAATATCTAATATATCCACCCTCAAAC	TGGGTTAGTGTAGGTGT
		Chr14:105792523 (#2)
SH3GL1	Hyper	Chr19:4386251 (#1)	GGGATTTTGATGAGTGAGGTTGTTAG	CACCCCCATCCAACCCTAC	GTTAGTTGTGGGGTTTTA
		Chr19:4386268 (#2)
		Chr19:4386271 (#3)
		Chr19:4386277 (#4)
TAB2	Hyper	Chr6:149679116 (#1)	AGAGAAGAGATTTTATTATGTTGGTTAGGT	AATTTACAAACCCTATAACTCAACAA	GGTTTTTTAAAGTGTTAGGATTAT
		Chr6:149679128 (#2)
		Chr6:149679132 (#3)
BCL2	Hypo	Chr18:60924924 (#1)	GGATGGTATTAAGTTTGGTTTTAGTTG	CCCATAACACTACTCTTTCTCAATTT	CTTAATTACTCATTTCAAAAATAAAAACATTC
		Chr18:60925050 (#2)			AAATTTCTCTCCCTAATTCAA
CD83	Hypo	Chr6:14072394 (#1)	GAGAGTGGAGTATATGTTTAGTGTATTTA	GAGAGTGGAGTATATGTTTAGTGTATTTA	GGTTTTTTTTGTTAATAGTTTGAA
IRF4	Hypo	Chr6:405130 (#1)	GGTGATGAGGGTTTTTGAATATG	CCTCCCTAATTCTTTAATAAACAAATC	ATTTTTAGAGGTAAAGAAAGT
		Chr6:405246 (#2)			AAATGTTAAATGATTTGGAAAAATA
REL	Hypo	Chr2:61083779 (#1)	AAGGTTAGATAAGGAGTTAATAGTAAG	TTTCCTAAATATATCCCCTCAAAATACA	GGGAAATAGTTTTTTAAAGATTATAAAAGT
TRAFD1	Hypo	Chr12:112587381 (#1)	GTTGTTTTGAAGGTAGTGAGTTATT	ACCAAAATTAATACCTCTAAATTAAATCAT	GTTTTTGTTAGTGTTTTATGTG
		Chr12:112587570 (#2)		ATCTAAAAATCCCCTCTATCACAT	ATTTTGGTTTTTTTTGTTTAGG
NFKB1	Hypo	Chr4:103520328 (#1)	AGGGTTTTATTATTGTTTTTTGAAATGTG	ACCCAAATCTCTTATTTTAATTCAACTC	AGAAAAAGGTTATATTTTTAAAATTG
		Chr4:103520345 (#2)
