# Supplementary material for: Bacterial infection remodels the DNA methylation landscape of human dendritic cells
Source: HighWire-hosted journal article supplement (doi:10.1101/gr.192005.115), 2015-09-21
Supplement: TableS4_GO.xlsx [file TableS4_GO.xlsx]

## Sheet: Sheet1
Supplementary Table 4: Gene ontology categories for genes that are associated with hypomethylated regions (≥3 CpG sites).
GO category	FDRa	Genes
regulation of biological process	4.15718e-07	BCL2L11, ZNF783, CDH5, DNAJB6, PREB, FRY, NAMPT, PLXNC1, SORBS3, TNK2, TRIB1, CDK8, RAMP1, CDKN1C, SMNDC1, DNAJA2, IKZF1, RRAGB, CDKN3, LRRN2, UBE2E3, NCOA2, SEMA4D, BATF, HBXIP, ARFGEF1, SH2B2, TRIM16, CELF2, GNA13, NFAT5, OR5I1, FRS2, ARID5A, FGL2, TRAFD1, TCERG1, FERMT2, KIF2C, RAB35, ADAP1, WWP2, CHD3, ADCY5, FGFR1OP, FOXN3, PLA2G16, LZTS1, AKAP13, AKAP10, EGLN3, STX1B, CCDC101, LYST, SYNPO, …
regulation of cellular process	4.15718e-07	BCL2L11, ZNF783, CDH5, DNAJB6, PREB, FRY, NAMPT, PLXNC1, SORBS3, TNK2, TRIB1, CDK8, CDKN1C, SMNDC1, DNAJA2, IKZF1, RRAGB, CDKN3, LRRN2, NCOA2, SEMA4D, BATF, HBXIP, ARFGEF1, SH2B2, TRIM16, GNA13, NFAT5, OR5I1, FRS2, ARID5A, FGL2, TCERG1, FERMT2, KIF2C, RAB35, ADAP1, CHD3, ADCY5, FGFR1OP, FOXN3, PLA2G16, LZTS1, AKAP13, AKAP10, EGLN3, STX1B, CCDC101, LYST, SYNPO, ZNF257, UCN3, ZNF618, ADCY9, IL22RA2…
biological regulation	5.57918e-06	BCL2L11, ZNF783, CDH5, DNAJB6, PREB, FRY, NAMPT, PLXNC1, SORBS3, TNK2, TRIB1, CDK8, RAMP1, CDKN1C, SMNDC1, DNAJA2, IKZF1, RRAGB, CDKN3, CACNG2, LRRN2, UBE2E3, NCOA2, SEMA4D, BATF, HBXIP, ARFGEF1, SH2B2, TRIM16, CELF2, GNA13, CORIN, NFAT5, OR5I1, FRS2, ARID5A, FGL2, TRAFD1, UTS2, TCERG1, FERMT2, KIF2C, RAB35, ADAP1, WWP2, CHD3, ADCY5, FGFR1OP, FOXN3, CHGA, PLA2G16, LZTS1, AKAP13, AKAP10, EGLN3, ST…
signaling	2.58414e-05	NAMPT, GPR64, PLXNC1, SORBS3, TNK2, TRIB1, RAMP1, EFS, CDKN1C, RRAGB, CACNG2, LRRN2, NCOA2, ARFGEF1, SH2B2, TRIM16, GNA13, NFAT5, OR5I1, FRS2, FGL2, UTS2, RAB35, ADAP1, ADCY5, FOXN3, LZTS1, AKAP13, AKAP10, STX1B, PTH2, UCN3, ADCY9, IL22RA2, CLCN6, PDZD8, CCR5, CCR6, GPR139, CNTNAP5, COL15A1, KLF6, MAP3K8, ABRA, CREM, CRH, CSNK1A1, CSNK1E, CSNK1G3, CTNNB1, SIK1, PPM1L, CNTN4, ADRB1, PLEKHG4B, ADRB…
signal transduction	2.58414e-05	NAMPT, PLXNC1, SORBS3, TNK2, TRIB1, RRAGB, LRRN2, ARFGEF1, SH2B2, GNA13, NFAT5, OR5I1, FRS2, FGL2, RAB35, ADCY5, FOXN3, AKAP13, AKAP10, UCN3, ADCY9, IL22RA2, CLCN6, CCR6, GPR139, CNTNAP5, COL15A1, KLF6, MAP3K8, ABRA, CREM, CRH, CSNK1A1, CSNK1E, CSNK1G3, CTNNB1, SIK1, PPM1L, ADRB1, PLEKHG4B, ADRBK2, DAPK1, BMPER, DUSP4, ECT2, LPAR1, SPRED2, MECOM, EXT1, EXT2, UNC5B, RAB18, MAST1, FOXM1, FOXO1, ERC…
protein binding	6.53633e-05	BCL2L11, CDH5, DNAJB6, ACTR2, PREB, ACTR1B, TRAP1, NAMPT, PLXNC1, SORBS3, TNK2, DDX39, TRIB1, CDK8, STAM2, STAG1, EFS, CDKN1C, SMNDC1, DNAJA2, IKZF1, RRAGB, CDKN3, CACNG2, LRRN2, COG5, UBE2E3, NCOA2, SEMA4D, BATF, HBXIP, RPP38, ARFGEF1, SH2B2, TGOLN2, TRIM16, CELF2, GNA13, POLD3, RAI1, NUP50, FRS2, TUBGCP2, FGL2, TRAFD1, UTS2, TCERG1, CBX1, SF3B2, KIF2C, ADAP1, PAPD7, WWP2, CHD3, FGFR1OP, FOXN3, …
signaling process	0.00022215	NAMPT, PLXNC1, SORBS3, TNK2, TRIB1, RRAGB, CACNG2, LRRN2, ARFGEF1, SH2B2, GNA13, NFAT5, OR5I1, FRS2, FGL2, UTS2, RAB35, ADCY5, FOXN3, LZTS1, AKAP13, AKAP10, STX1B, UCN3, ADCY9, IL22RA2, CLCN6, CCR6, GPR139, CNTNAP5, COL15A1, KLF6, MAP3K8, ABRA, CREM, CRH, CSNK1A1, CSNK1E, CSNK1G3, CTNNB1, SIK1, PPM1L, CNTN4, ADRB1, PLEKHG4B, ADRBK2, DAPK1, BMPER, DUSP4, ECE1, ECT2, LPAR1, SPRED2, MECOM, EXT1, EXT…
signal transmission	0.000237665	NAMPT, PLXNC1, SORBS3, TNK2, TRIB1, RRAGB, CACNG2, LRRN2, ARFGEF1, SH2B2, GNA13, NFAT5, OR5I1, FRS2, FGL2, UTS2, RAB35, ADCY5, FOXN3, LZTS1, AKAP13, AKAP10, STX1B, UCN3, ADCY9, IL22RA2, CLCN6, CCR6, GPR139, CNTNAP5, COL15A1, KLF6, MAP3K8, ABRA, CREM, CRH, CSNK1A1, CSNK1E, CSNK1G3, CTNNB1, SIK1, PPM1L, CNTN4, ADRB1, PLEKHG4B, ADRBK2, DAPK1, BMPER, DUSP4, ECT2, LPAR1, SPRED2, MECOM, EXT1, EXT2, UNC…
intracellular signal transduction	0.000240901	SORBS3, TNK2, TRIB1, ARFGEF1, SH2B2, GNA13, FRS2, RAB35, ADCY5, AKAP13, UCN3, ADCY9, IL22RA2, GPR139, ABRA, CTNNB1, SIK1, PPM1L, ADRB1, PLEKHG4B, DAPK1, BMPER, DUSP4, ECT2, LPAR1, SPRED2, MECOM, RAB18, MAST1, FOXM1, FOXO1, ERC1, SIPA1L3, RAP1GAP2, MAPK8IP3, MCF2L, RASGRP3, FBXO8, RAB30, GNAI2, GNAS, MCHR1, RAPGEF1, HIPK2, ABR, GSN, MDFIC, BIRC2, ECT2L, FASLG, ITPKB, JAK3, MAP3K4, MYO9B, NFKBIA, N…
signaling pathway	0.000407228	NAMPT, GPR64, SORBS3, TNK2, TRIB1, RAMP1, EFS, CDKN1C, NCOA2, ARFGEF1, SH2B2, TRIM16, GNA13, FRS2, RAB35, ADAP1, ADCY5, FOXN3, AKAP13, PTH2, UCN3, ADCY9, IL22RA2, PDZD8, CCR5, GPR139, KLF6, ABRA, CREM, CSNK1A1, CSNK1G3, CTNNB1, SIK1, PPM1L, ADRB1, PLEKHG4B, DAPK1, GPR125, BMPER, DUSP4, GPR183, ECE1, ECT2, LPAR1, SPRED2, ENG, EPHB4, ERN1, MECOM, LPHN1, RAB18, SCAP, MAST1, SPEN, USP33, FOXM1, FOXO1…
cellular process	0.000649288	CDH3, KILLIN, BCL2L11, ZNF783, CDH5, DNAJB6, ATP9A, ACTR2, PREB, FRY, TRAP1, NAMPT, PLXNC1, SORBS3, TNK2, DDX39, TRIB1, CDK8, STAM2, RAMP1, STAG1, EFS, CDKN1C, SMNDC1, DNAJA2, IKZF1, RRAGB, CDKN3, CACNG2, LRRN2, PECI, COG5, UBE2E3, NCOA2, SEMA4D, BATF, HBXIP, RPP38, ARFGEF1, MTHFS, SH2B2, TRIM16, CELF2, GNA13, POLD3, NFAT5, NUP50, OR5I1, FRS2, TUBGCP2, ARID5A, FGL2, UTS2, TCERG1, CBX1, FERMT2, SF…
regulation of signaling pathway	0.00124269	SORBS3, TRIB1, RAMP1, CDKN1C, ARFGEF1, SH2B2, TRIM16, FRS2, ADAP1, AKAP13, IL22RA2, ABRA, CTNNB1, PLEKHG4B, BMPER, ECE1, ECT2, LPAR1, SPRED2, ENG, MECOM, USP33, FOXM1, FOXO1, SIPA1L3, RAP1GAP2, TBC1D9, MAPK8IP3, TBC1D12, MCF2L, TBC1D22A, RASGRP3, FBXO8, DKK2, GRB10, RAPGEF1, HIPK2, ABR, MDFIC, BIRC2, ECT2L, FASLG, INHBA, ITPKB, C1orf187, LRP6, SMAD7, MAP3K4, NFKBIA, P2RX4, FURIN, CHST11, PAWR, TA…
positive regulation of cellular process	0.00135194	BCL2L11, NAMPT, SORBS3, TNK2, TRIB1, CDKN1C, SMNDC1, DNAJA2, IKZF1, SEMA4D, TRIM16, FGFR1OP, AKAP13, LYST, SYNPO, UCN3, ZNF488, KLF6, ABRA, CRH, CSNK1E, CTNNB1, ADRB1, DAP, DAPK1, DAZL, BMPER, ECE1, ECT2, LPAR1, AHR, ENG, ERN1, ETS2, MECOM, ALDH1A3, IKZF2, NLRP1, SCAP, FOXM1, FOXO1, FLT3, MCF2L, MYST4, ALOX12, SPDYA, ZBTB38, LDLRAP1, NGFRAP1, BBC3, GNAI2, GNAS, GRB10, HIPK2, ABR, GRIN2A, MDFIC, H…
intracellular signaling pathway	0.00161977	SORBS3, TNK2, TRIB1, EFS, NCOA2, ARFGEF1, SH2B2, TRIM16, GNA13, FRS2, RAB35, ADCY5, FOXN3, AKAP13, UCN3, ADCY9, IL22RA2, PDZD8, GPR139, ABRA, CREM, CTNNB1, SIK1, PPM1L, ADRB1, PLEKHG4B, DAPK1, BMPER, DUSP4, ECT2, LPAR1, SPRED2, ERN1, MECOM, RAB18, SCAP, MAST1, FOXM1, FOXO1, ERC1, SIPA1L3, RAP1GAP2, MAPK8IP3, MCF2L, RASGRP3, FBXO8, RAB30, GNAI2, GNAS, MCHR1, RAPGEF1, HIPK2, ABR, GSN, GUCY2F, MDFIC…
positive regulation of biological process	0.00218738	BCL2L11, NAMPT, SORBS3, TNK2, TRIB1, CDKN1C, SMNDC1, DNAJA2, IKZF1, SEMA4D, SH2B2, TRIM16, FRS2, FGFR1OP, AKAP13, LYST, SYNPO, UCN3, ZNF488, CCR4, KLF6, ABRA, CRH, CSNK1E, CTNNB1, ADRB1, DAP, DAPK1, DAZL, BMPER, ECE1, ECT2, LPAR1, AHR, ENG, ERN1, ETS2, MECOM, ALDH1A3, IKZF2, NLRP1, SCAP, FOXM1, FOXO1, ERC1, FLT3, MCF2L, MYST4, ALOX12, SPDYA, ZBTB38, TAC4, LDLRAP1, NGFRAP1, BBC3, GNAI2, GNAS, MCHR…
regulation of small GTPase mediated signal transduction	0.00330881	ARFGEF1, SH2B2, ADAP1, AKAP13, ABRA, PLEKHG4B, ECT2, FOXM1, SIPA1L3, RAP1GAP2, TBC1D9, TBC1D12, MCF2L, TBC1D22A, RASGRP3, FBXO8, RAPGEF1, ABR, ECT2L, ITPKB, TBC1D13, RALGAPB, TBC1D14, RAC1, RALGDS, RAP1GAP, RASAL3, TIAM1, TTN, VAV2, GARNL3, GPR65, CYTH3, CYTH1, GPR55, RASAL2, ARHGEF10, USP6NL
regulation of RNA metabolic process	0.00366024	ZNF783, DNAJB6, PREB, SORBS3, CDKN1C, IKZF1, NCOA2, BATF, TRIM16, NFAT5, ARID5A, CHD3, FOXN3, LZTS1, ZNF257, DBX1, AEBP2, KLF6, ABRA, CREM, ZFP28, ZFP90, ZNF565, CTNNB1, SIK1, ZNF746, ARID3A, E2F5, AHR, EMX2, ENG, ETS2, ETV6, MECOM, IKZF2, SBNO2, RAB18, SCAP, SPEN, FOXM1, ZHX3, FOXO1, ERC1, FLI1, KCNH3, RYBP, MYST4, ZNF281, ZBTB38, LASS6, ALX3, GATA3, LHX6, FOXP1, HIPK2, MDFIC, HLF, FOXA2, HOXC4,…
protein domain specific binding	0.00396608	EFS, TRIM16, STX1B, ADRB1, DAP, WBP2NL, EPB41L2, ETV6, DLGAP4, NLRP1, ERC1, OSTF1, RAPGEF1, SH3KBP1, INPP5A, INPP5D, MECP2, MPP3, MYO7A, PAWR, WBP11, SNTG2, ARHGAP17, ENAH, PRKAR2B, CENPJ, PLSCR4, PHRF1, DENND1A, PLEKHA2, BCL2, SRC, TCF4, YWHAE, YWHAZ, ADAM12, NDFIP1, TP63, ADAM19, CRADD, ADAM9, SYNJ2, LDB2, DLGAP2, CRIPT, HAND2, AKAP7, RPH3AL, LITAF, MTSS1
protein kinase activity	0.00424179	TNK2, TRIB1, CDK8, AKAP13, CLK3, MAP3K8, PNCK, CSNK1A1, CSNK1E, CSNK1G3, SIK1, ADRBK2, DAPK1, ENG, EPHB4, ERN1, FES, MAST1, CDK19, FLT3, SIK3, KCNH3, GAK, HIPK2, GUCY2F, IGF2R, JAK3, MAST4, KCNH1, KCNH2, SBK1, MARK3, MAP3K4, NTRK3, MINK1, CDK17, TAOK3, PDK1, ZAK, PHKB, PRKCH, MAP2K3, TWF1, TRIM27, RPS6KA1, RYK, SGK1, WNK1, WNK2, SRC, SRPK2, NEK4, TEC, TGFA, TGFBR2, TTN, TYK2, NUAK2, CDK13, NRP2, …
regulation of transcription	0.00501545	ZNF783, DNAJB6, PREB, FRY, SORBS3, TRIB1, CDK8, CDKN1C, IKZF1, NCOA2, BATF, TRIM16, NFAT5, ARID5A, TCERG1, CHD3, FOXN3, LZTS1, CCDC101, ZNF257, ZNF618, ZNF488, DBX1, AEBP2, ZFP3, KLF6, ZFP42, KLF14, ABRA, CREM, ZFP28, ZFP90, ZNF565, CTNNB1, SIK1, ZNF746, DAP, ZFPM1, ASXL1, ARID3A, E2F5, AHR, EMX2, ENG, ERN1, ETS2, ETV6, MECOM, IKZF2, SBNO2, RAB18, ELL2, SCAP, KDM2A, SPEN, FOXM1, ZHX3, SETD1B, FOX…
intracellular protein kinase cascade	0.00648603	SORBS3, TRIB1, GNA13, FRS2, IL22RA2, CTNNB1, SIK1, PPM1L, DAPK1, BMPER, DUSP4, ECT2, LPAR1, SPRED2, MECOM, MAST1, FOXM1, FOXO1, ERC1, MAPK8IP3, RASGRP3, GNAI2, HIPK2, MDFIC, BIRC2, FASLG, ITPKB, JAK3, MAP3K4, NFKBIA, MINK1, MLXIPL, TAOK3, ZAK, PPP2CA, IL26, PRLR, MAVS, REL, RPS6KA1, AIDA, WNK1, WNK2, SRC, SRPK2, SS18, TEC, TGFA, TRAF2, TRAF5, TYK2, CXCR4, NDFIP1, TLR10, ADAM9, TNFRSF11A, SOCS2, B…
signal transmission via phosphorylation event	0.00648603	SORBS3, TRIB1, GNA13, FRS2, IL22RA2, CTNNB1, SIK1, PPM1L, DAPK1, BMPER, DUSP4, ECT2, LPAR1, SPRED2, MECOM, MAST1, FOXM1, FOXO1, ERC1, MAPK8IP3, RASGRP3, GNAI2, HIPK2, MDFIC, BIRC2, FASLG, ITPKB, JAK3, MAP3K4, NFKBIA, MINK1, MLXIPL, TAOK3, ZAK, PPP2CA, IL26, PRLR, MAVS, REL, RPS6KA1, AIDA, WNK1, WNK2, SRC, SRPK2, SS18, TEC, TGFA, TRAF2, TRAF5, TYK2, CXCR4, NDFIP1, TLR10, ADAM9, TNFRSF11A, SOCS2, B…
regulation of cellular biosynthetic process	0.00858816	ZNF783, DNAJB6, PREB, FRY, SORBS3, TRIB1, CDK8, CDKN1C, IKZF1, NCOA2, BATF, TRIM16, GNA13, NFAT5, ARID5A, TCERG1, CHD3, ADCY5, FOXN3, LZTS1, CCDC101, ZNF257, UCN3, ZNF618, ADCY9, ZNF488, DBX1, AEBP2, ZFP3, KLF6, ZFP42, CPEB2, KLF14, ABRA, CREM, ZFP28, ZFP90, ZNF565, CTNNB1, SIK1, ADRB1, ZNF746, DAP, DAZL, ZFPM1, ASXL1, DLAT, ARID3A, E2F5, AHR, EIF5, EMX2, ENG, ERN1, ETS2, ETV6, MECOM, IKZF2, SBNO…
regulation of nitrogen compound metabolic process	0.00878737	ZNF783, DNAJB6, PREB, FRY, SORBS3, TRIB1, CDK8, CDKN1C, IKZF1, NCOA2, BATF, TRIM16, GNA13, NFAT5, ARID5A, TCERG1, ADAP1, CHD3, ADCY5, FOXN3, LZTS1, CCDC101, ZNF257, UCN3, ZNF618, ADCY9, ZNF488, DBX1, AEBP2, ZFP3, KLF6, ZFP42, KLF14, ABRA, CREM, ZFP28, ZFP90, ZNF565, CTNNB1, SIK1, ADRB1, ZNF746, DAP, ZFPM1, ASXL1, ARID3A, E2F5, AHR, EMX2, ENG, ERN1, ETS2, ETV6, MECOM, IKZF2, SBNO2, RAB18, ELL2, SC…
transcription	0.00887282	ZNF783, DNAJB6, PREB, FRY, SORBS3, TRIB1, CDK8, CDKN1C, IKZF1, NCOA2, BATF, TRIM16, NFAT5, ARID5A, TCERG1, CHD3, FOXN3, LZTS1, CCDC101, ZNF257, ZNF618, ZNF488, DBX1, AEBP2, ZFP3, KLF6, ZFP42, KLF14, ABRA, CREM, ZFP28, ZFP90, ZNF565, CTNNB1, SIK1, ZNF746, DAP, ZFPM1, ASXL1, ARID3A, E2F5, AHR, EMX2, ENG, ERN1, ETS2, ETV6, MECOM, IKZF2, SBNO2, RAB18, ELL2, SCAP, KDM2A, SPEN, FOXM1, ZHX3, SETD1B, FOX…
regulation of biosynthetic process	0.00952982	ZNF783, DNAJB6, PREB, FRY, NAMPT, SORBS3, TRIB1, CDK8, CDKN1C, IKZF1, NCOA2, BATF, TRIM16, GNA13, NFAT5, ARID5A, TCERG1, CHD3, ADCY5, FOXN3, LZTS1, CCDC101, ZNF257, UCN3, ZNF618, ADCY9, ZNF488, DBX1, AEBP2, ZFP3, KLF6, ZFP42, CPEB2, KLF14, ABRA, CREM, ZFP28, ZFP90, ZNF565, CTNNB1, SIK1, ADRB1, ZNF746, DAP, DAZL, ZFPM1, ASXL1, DLAT, ARID3A, E2F5, AHR, EIF5, EMX2, ENG, ERN1, ETS2, ETV6, MECOM, IKZF…
regulation of cell communication	0.0106971	SORBS3, TRIB1, CDKN1C, ARFGEF1, SH2B2, TRIM16, FRS2, ADAP1, LZTS1, AKAP13, UCN3, IL22RA2, ABRA, CRH, CTNNB1, CNTN4, PLEKHG4B, BMPER, ECE1, ECT2, LPAR1, SPRED2, ENG, MECOM, FOXM1, FOXO1, SIPA1L3, RAP1GAP2, TBC1D9, MAPK8IP3, TBC1D12, MCF2L, TBC1D22A, RASGRP3, FBXO8, DKK2, GNAI2, GRB10, RAPGEF1, HIPK2, ABR, GRIN2A, MDFIC, BIRC2, ECT2L, FASLG, INHBA, INPP5D, ITPKB, C1orf187, LRP6, SMAD7, MAP3K4, NFKB…
regulation of primary metabolic process	0.0106971	ZNF783, DNAJB6, PREB, FRY, SORBS3, TNK2, TRIB1, CDK8, CDKN1C, IKZF1, UBE2E3, NCOA2, BATF, TRIM16, GNA13, NFAT5, ARID5A, TCERG1, ADAP1, CHD3, ADCY5, FOXN3, LZTS1, CCDC101, ZNF257, UCN3, ZNF618, ADCY9, IL22RA2, ZNF488, DBX1, AEBP2, ZFP3, KLF6, ZFP42, CPEB2, KLF14, ABRA, CREM, ZFP28, CSNK1E, ZFP90, ZNF565, UBE2U, CTNNB1, SIK1, ADRB1, ZNF746, DAP, DAZL, ZFPM1, BMPER, ASXL1, ARID3A, E2F5, ECE1, AHR, E…
regulation of signaling process	0.0106971	SORBS3, TRIB1, ARFGEF1, SH2B2, FRS2, ADAP1, AKAP13, IL22RA2, ABRA, CTNNB1, PLEKHG4B, BMPER, ECE1, ECT2, LPAR1, SPRED2, MECOM, FOXM1, FOXO1, SIPA1L3, RAP1GAP2, TBC1D9, MAPK8IP3, TBC1D12, MCF2L, TBC1D22A, RASGRP3, FBXO8, RAPGEF1, HIPK2, ABR, MDFIC, BIRC2, ECT2L, FASLG, INPP5D, ITPKB, MAP3K4, P2RX4, TAOK3, ZAK, TBC1D13, PPP2CA, IL26, RALGAPB, MAVS, RPTOR, TBC1D14, RAC1, RALGDS, RAP1GAP, REL, RGS1, G…
lymphocyte differentiation	0.0119147	IKZF1, CLPTM1, KLF6, CTNNB1, GPR183, FLT3, INHBA, INPP5D, IRF4, ITPKB, MINK1, PAX1, PLCG2, BCL2, SOX4, ZEB1, TGFBR2, TPD52, NDFIP1, CD8A, CD83, CD80
regulation of cellular metabolic process	0.0119147	ZNF783, DNAJB6, PREB, FRY, SORBS3, TNK2, TRIB1, CDK8, CDKN1C, IKZF1, CDKN3, NCOA2, BATF, TRIM16, GNA13, NFAT5, FRS2, ARID5A, TCERG1, ADAP1, CHD3, ADCY5, FGFR1OP, FOXN3, LZTS1, CCDC101, ZNF257, UCN3, ZNF618, ADCY9, IL22RA2, ZNF488, DBX1, AEBP2, ZFP3, KLF6, ZFP42, CPEB2, KLF14, ABRA, CREM, ZFP28, CSNK1E, ZFP90, ZNF565, CTNNB1, SIK1, ADRB1, ZNF746, DAP, DAZL, ZFPM1, GADD45A, BMPER, ASXL1, DLAT, ARID…
actin binding	0.0120086	ACTR2, SYNPO, CCR5, SHROOM1, ABRA, EPB41L2, PHACTR1, LIMCH1, FLNB, SYNE2, GSN, HIP1, ABLIM1, MARCKS, MYO1E, MYO7A, MYO9A, MYO9B, MYO10, LIMA1, PLEC, SNTG2, ENAH, ACTR3B, ERMN, MKL2, TWF1, RDX, INF2, FSCN1, SPTAN1, SPTBN1, TPM4, TTN, WIPF1, CXCR4, CLMN, NCALD, ABLIM2, GAS7, MTSS1
regulation of signal transduction	0.0120086	SORBS3, TRIB1, ARFGEF1, SH2B2, FRS2, ADAP1, AKAP13, IL22RA2, ABRA, CTNNB1, PLEKHG4B, BMPER, ECT2, LPAR1, SPRED2, MECOM, FOXM1, FOXO1, SIPA1L3, RAP1GAP2, TBC1D9, MAPK8IP3, TBC1D12, MCF2L, TBC1D22A, RASGRP3, FBXO8, RAPGEF1, HIPK2, ABR, MDFIC, BIRC2, ECT2L, FASLG, INPP5D, ITPKB, MAP3K4, P2RX4, TAOK3, ZAK, TBC1D13, PPP2CA, IL26, RALGAPB, MAVS, RPTOR, TBC1D14, RAC1, RALGDS, RAP1GAP, REL, RGS1, GOLPH3,…
RNA biosynthetic process	0.0120086	ZNF783, DNAJB6, PREB, SORBS3, CDKN1C, IKZF1, NCOA2, BATF, TRIM16, NFAT5, ARID5A, TCERG1, CHD3, FOXN3, LZTS1, ZNF257, DBX1, AEBP2, KLF6, ABRA, CREM, ZFP28, ZFP90, ZNF565, CTNNB1, SIK1, ZNF746, ARID3A, E2F5, AHR, EMX2, ENG, ETS2, ETV6, MECOM, IKZF2, SBNO2, RAB18, ELL2, SCAP, SPEN, FOXM1, ZHX3, FOXO1, ERC1, FLI1, KCNH3, RYBP, MYST4, ZNF281, ZBTB38, LASS6, ALX3, CCRN4L, GATA3, LHX6, FOXP1, HIPK2, MDF…
regulation of macromolecule biosynthetic process	0.0125547	ZNF783, DNAJB6, PREB, FRY, NAMPT, SORBS3, TRIB1, CDK8, CDKN1C, IKZF1, NCOA2, BATF, TRIM16, NFAT5, ARID5A, TCERG1, CHD3, FOXN3, LZTS1, CCDC101, ZNF257, ZNF618, ZNF488, DBX1, AEBP2, ZFP3, KLF6, ZFP42, CPEB2, KLF14, ABRA, CREM, ZFP28, ZFP90, ZNF565, CTNNB1, SIK1, ZNF746, DAP, DAZL, ZFPM1, ASXL1, ARID3A, E2F5, AHR, EIF5, EMX2, ENG, ERN1, ETS2, ETV6, MECOM, IKZF2, SBNO2, RAB18, ELL2, SCAP, KDM2A, SPEN…
regulation of metabolic process	0.0127208	ZNF783, DNAJB6, PREB, FRY, NAMPT, SORBS3, TNK2, TRIB1, CDK8, CDKN1C, IKZF1, CDKN3, UBE2E3, NCOA2, BATF, SH2B2, TRIM16, GNA13, NFAT5, FRS2, ARID5A, TCERG1, ADAP1, WWP2, CHD3, ADCY5, FGFR1OP, FOXN3, LZTS1, CCDC101, ZNF257, UCN3, ZNF618, ADCY9, IL22RA2, ZNF488, DBX1, AEBP2, TDRD9, ZFP3, KLF6, ZFP42, CPEB2, KLF14, ABRA, CREM, ZFP28, CSNK1E, ZFP90, ZNF565, UBE2U, CTNNB1, SIK1, ADRB1, ZNF746, DAP, DAZL…
regulation of gene expression	0.0135052	ZNF783, DNAJB6, PREB, FRY, SORBS3, TRIB1, CDK8, CDKN1C, IKZF1, NCOA2, BATF, TRIM16, NFAT5, ARID5A, TCERG1, WWP2, CHD3, FOXN3, LZTS1, CCDC101, ZNF257, ZNF618, ZNF488, DBX1, AEBP2, TDRD9, ZFP3, KLF6, ZFP42, CPEB2, KLF14, ABRA, CREM, ZFP28, ZFP90, ZNF565, CTNNB1, SIK1, ZNF746, DAP, DAZL, ZFPM1, ASXL1, ARID3A, E2F5, AHR, EIF5, EMX2, ENG, ERN1, ETS2, ETV6, MECOM, IKZF2, SBNO2, RAB18, ELL2, SCAP, KDM2A…
positive regulation of gene expression	0.0141107	IKZF1, TRIM16, KLF6, ABRA, CTNNB1, AHR, ENG, ETS2, MECOM, IKZF2, SCAP, FOXO1, MYST4, ALOX12, ZBTB38, HIPK2, MDFIC, FOXA2, HES1, RBPJ, INHBA, IRF4, JAK3, MAFA, LRP6, SMAD9, ATF1, NFIC, NFKB1, NFKBIA, NOTCH4, PAX1, MLXIPL, KLF13, ATF7IP, IL26, MAP2K3, ZMIZ1, ARID1B, MKL2, ZNF462, REL, ALX4, ATXN1, SFRP4, EBF2, SOX4, SOX9, SS18, TAF2, TCF4, ZEB1, TEAD1, WNT6, ZNF148, ZBTB17, PAX8, TBL1XR1, CSRNP3, J…
positive regulation of transcription	0.0144974	IKZF1, TRIM16, KLF6, ABRA, CTNNB1, AHR, ENG, ETS2, MECOM, IKZF2, SCAP, FOXO1, MYST4, ZBTB38, HIPK2, MDFIC, FOXA2, HES1, RBPJ, INHBA, IRF4, JAK3, MAFA, LRP6, SMAD9, ATF1, NFIC, NFKB1, NFKBIA, NOTCH4, PAX1, MLXIPL, KLF13, ATF7IP, IL26, MAP2K3, ZMIZ1, ARID1B, MKL2, ZNF462, REL, ALX4, ATXN1, EBF2, SOX4, SOX9, SS18, TAF2, TCF4, ZEB1, TEAD1, ZNF148, ZBTB17, PAX8, TBL1XR1, CSRNP3, JHDM1D, ARID1A, PICALM…
intracellular	0.014648	CDH3, KILLIN, BCL2L11, ZNF783, DNAJB6, ACTR2, PREB, ACTR1B, TRAP1, NAMPT, PLXNC1, SORBS3, DDX39, TRIB1, CDK8, STAM2, STAG1, EFS, CDKN1C, SMNDC1, IKZF1, RRAGB, COX4NB, CDKN3, CACNG2, PECI, COG5, UBE2E3, C1orf61, NCOA2, BATF, HBXIP, RPP38, ARFGEF1, MTHFS, SH2B2, TGOLN2, TRIM16, CELF2, GNA13, POLD3, NFAT5, RAI1, NUP50, HSPH1, FRS2, TUBGCP2, ARID5A, TRAFD1, TCERG1, CBX1, FERMT2, SF3B2, SLC27A3, KIF2C…
leukocyte differentiation	0.0174598	IKZF1, CLPTM1, KLF6, CTNNB1, GPR183, FLT3, GNAS, ID2, INHBA, INPP5D, IRF4, ITPKB, MINK1, PAX1, PLCG2, BCL2, CCL5, SOX4, SPIB, ZEB1, TGFBR2, TPD52, NDFIP1, TNFRSF11A, CD8A, GPR55, CD83, CD80
biotin binding	0.0209447	ACACA, HLCS, PC, PCCA
binding	0.0210049	CDH3, KILLIN, BCL2L11, TTC34, ZNF783, CDH5, DNAJB6, ATP9A, ACTR2, PREB, ACTR1B, TRAP1, NAMPT, PLXNC1, SORBS3, TNK2, DDX39, TRIB1, CDK8, STAM2, STAG1, EFS, CDKN1C, SMNDC1, DNAJA2, IKZF1, RRAGB, CDKN3, CACNG2, LRRN2, PECI, COG5, UBE2E3, NCOA2, SEMA4D, BATF, HBXIP, RPP38, ARFGEF1, MTHFS, SH2B2, TGOLN2, TRIM16, CELF2, GNA13, POLD3, NFAT5, RAI1, NUP50, HSPH1, FRS2, TUBGCP2, ARID5A, FGL2, TRAFD1, UTS2,…
enzyme linked receptor protein signaling pathway	0.0219038	NAMPT, CDKN1C, SH2B2, FRS2, CTNNB1, PPM1L, BMPER, ENG, EPHB4, MECOM, FOXO1, FLT3, GFRA2, GRB10, RAPGEF1, HIPK2, GUCY2F, FASLG, INHBA, JAK3, LCP2, SMAD7, SMAD9, MYO1E, NGF, NTRK3, FURIN, CHST11, ECSIT, PIK3R1, ERBB2IP, PRLR, SMURF1, PTPN1, PTPRD, PTPRJ, ATXN1, SMURF2, SPTBN1, SRC, SS18, ZEB1, TGFA, TGFBR2, TIAM1, USP9X, ARID5B, NCK2, ADAM9, SOCS2, ACVR2A, CD8A, RPS6KA5, MTSS1
positive regulation of apoptosis	0.0219038	BCL2L11, SMNDC1, AKAP13, LYST, CRH, CTNNB1, DAP, DAPK1, ECT2, ERN1, ALDH1A3, NLRP1, MCF2L, ALOX12, NGFRAP1, BBC3, HIPK2, ABR, GRIN2A, HIP1, NUDT2, IGF2R, FASLG, INHBA, INPP5D, NGF, PAWR, WWOX, ZAK, PLA2G4A, PMAIP1, PPP2CA, PPP2R5C, KIAA1967, PVR, RAC1, BCL2, DPF2, SFRP4, ZMAT3, SOX4, TIAM1, TRAF2, TRAF3, VAV2, YWHAE, PLEKHF1, CSRNP3, TM2D1, TP63, RUNX3, CRADD, IKBKE
positive regulation of RNA metabolic process	0.0219038	IKZF1, TRIM16, KLF6, ABRA, CTNNB1, AHR, ENG, ETS2, MECOM, IKZF2, SCAP, FOXO1, ZBTB38, HIPK2, MDFIC, FOXA2, HES1, INHBA, IRF4, JAK3, MAFA, ATF1, NFIC, NFKBIA, NOTCH4, PAX1, MLXIPL, KLF13, ATF7IP, IL26, MAP2K3, ZMIZ1, ARID1B, MKL2, ZNF462, REL, ALX4, ATXN1, SOX4, SOX9, SS18, TAF2, TCF4, ZEB1, TEAD1, ZNF148, ZBTB17, PAX8, TBL1XR1, CSRNP3, JHDM1D, ARID1A, TCF7L1, PCBD2, KLF7, TP63, HAND2, CREB5
small GTPase regulator activity	0.0219038	ARFGEF1, ADAP1, AKAP13, PLEKHG4B, ECT2, ERC1, TBC1D9, TBC1D12, MCF2L, TBC1D22A, RASGRP3, FBXO8, GDI2, ABR, ECT2L, MYO9B, MINK1, WDR44, TBC1D13, DOCK10, RALGAPB, TBC1D14, RALGDS, TIAM1, TTN, VAV2, ARHGAP10, GARNL3, CCDC64, CYTH3, CYTH1, MAP4K4, RASAL2, RPH3AL, ARHGEF10, USP6NL
GTPase regulator activity	0.023786	TNK2, ARFGEF1, ADAP1, AKAP13, PLEKHG4B, ECT2, ERC1, SIPA1L3, RAP1GAP2, TBC1D9, TBC1D12, MCF2L, TBC1D22A, RASGRP3, FBXO8, GDI2, RAPGEF1, ABR, ECT2L, MYO9A, MYO9B, MINK1, WDR44, TBC1D13, ARHGAP17, DOCK10, CDC42SE1, RALGAPB, TBC1D14, RALGDS, RAP1GAP, RGS1, RASAL3, TIAM1, TTN, VAV2, ARHGAP10, GARNL3, CCDC64, CYTH3, CYTH1, MAP4K4, RASAL2, RPH3AL, RIN1, ARHGEF10, USP6NL, ARHGAP25
cytoskeletal protein binding	0.0240334	BCL2L11, ACTR2, SORBS3, ARFGEF1, KIF2C, SYNPO, CCR5, SHROOM1, ABRA, CTNNA1, EPB41L2, PHACTR1, LIMCH1, MAPK8IP3, FLNB, SYNE2, CLASP1, SYNM, ANK1, GSN, HIP1, ABLIM1, MARCKS, MYO1E, MYO7A, MYO9A, MYO9B, MYO10, LIMA1, PLEC, SNTG2, ENAH, CDK5RAP2, CENPJ, ACTR3B, ERMN, MKL2, TWF1, RDX, ACTB, INF2, FSCN1, SPTAN1, SPTBN1, TPM4, TTN, WIPF1, CXCR4, CLMN, NCALD, NCK2, ABLIM2, GAS7, CCDC64, RPH3AL, MTSS1
positive regulation of programmed cell death	0.0240334	BCL2L11, SMNDC1, AKAP13, LYST, CRH, CTNNB1, DAP, DAPK1, ECT2, ERN1, ALDH1A3, NLRP1, MCF2L, ALOX12, NGFRAP1, BBC3, HIPK2, ABR, GRIN2A, HIP1, NUDT2, IGF2R, FASLG, INHBA, INPP5D, NGF, PAWR, WWOX, ZAK, PLA2G4A, PMAIP1, PPP2CA, PPP2R5C, KIAA1967, PVR, RAC1, BCL2, DPF2, SFRP4, ZMAT3, SOX4, TIAM1, TRAF2, TRAF3, VAV2, YWHAE, PLEKHF1, CSRNP3, TM2D1, TP63, RUNX3, CRADD, IKBKE
cell surface receptor linked signaling pathway	0.0260858	NAMPT, GPR64, TRIB1, RAMP1, CDKN1C, SH2B2, GNA13, FRS2, ADAP1, ADCY5, PTH2, UCN3, ADCY9, CCR5, GPR139, KLF6, CSNK1A1, CSNK1G3, CTNNB1, PPM1L, ADRB1, GPR125, BMPER, GPR183, ECE1, LPAR1, ENG, EPHB4, MECOM, LPHN1, SPEN, USP33, FOXO1, FLT3, TAC4, GFRA2, DKK2, GNAI2, GNAS, GPR133, MCHR1, GRB10, RAPGEF1, HIPK2, GRIN2A, GUCY2F, MDFIC, EMR2, HES1, BIRC2, BIRC3, RBPJ, FASLG, INHBA, ITGA9, ITGB6, ITPKB, JA…
cell	0.0289202	CDH3, KILLIN, BCL2L11, ZNF783, CDH5, DNAJB6, ATP9A, ACTR2, PREB, ACTR1B, FRY, TRAP1, NAMPT, GPR64, PLXNC1, SORBS3, TNK2, DDX39, TRIB1, CDK8, STAM2, RAMP1, STAG1, EFS, CDKN1C, SMNDC1, DNAJA2, IKZF1, RRAGB, COX4NB, CDKN3, CACNG2, LRRN2, PECI, COG5, UBE2E3, C1orf61, NCOA2, SEMA4D, BATF, HBXIP, RPP38, ARFGEF1, MTHFS, SH2B2, TGOLN2, TRIM16, CELF2, GNA13, CORIN, POLD3, NFAT5, RAI1, NUP50, OR5I1, HSPH1,…
cell part	0.0289202	CDH3, KILLIN, BCL2L11, ZNF783, CDH5, DNAJB6, ATP9A, ACTR2, PREB, ACTR1B, FRY, TRAP1, NAMPT, GPR64, PLXNC1, SORBS3, TNK2, DDX39, TRIB1, CDK8, STAM2, RAMP1, STAG1, EFS, CDKN1C, SMNDC1, DNAJA2, IKZF1, RRAGB, COX4NB, CDKN3, CACNG2, LRRN2, PECI, COG5, UBE2E3, C1orf61, NCOA2, SEMA4D, BATF, HBXIP, RPP38, ARFGEF1, MTHFS, SH2B2, TGOLN2, TRIM16, CELF2, GNA13, CORIN, POLD3, NFAT5, RAI1, NUP50, OR5I1, HSPH1,…
induction of apoptosis by extracellular signals	0.0289202	BCL2L11, AKAP13, CRH, DAP, DAPK1, ECT2, MCF2L, NGFRAP1, ABR, FASLG, NGF, RAC1, DPF2, TIAM1, VAV2, YWHAE, TM2D1, CRADD
positive regulation of cell death	0.0289202	BCL2L11, SMNDC1, AKAP13, LYST, CRH, CTNNB1, DAP, DAPK1, ECT2, ERN1, ALDH1A3, NLRP1, MCF2L, ALOX12, NGFRAP1, BBC3, HIPK2, ABR, GRIN2A, HIP1, NUDT2, IGF2R, FASLG, INHBA, INPP5D, NGF, PAWR, WWOX, ZAK, PLA2G4A, PMAIP1, PPP2CA, PPP2R5C, KIAA1967, PVR, RAC1, BCL2, DPF2, SFRP4, ZMAT3, SOX4, TIAM1, TRAF2, TRAF3, VAV2, YWHAE, PLEKHF1, CSRNP3, TM2D1, TP63, RUNX3, CRADD, IKBKE
regulation of lymphocyte differentiation	0.0289202	IKZF1, CLPTM1, FLT3, INHBA, INPP5D, IRF4, ITPKB, ZEB1, TGFBR2, NDFIP1, CD83, CD80
transcription regulator activity	0.0289202	DNAJB6, PREB, CDKN1C, IKZF1, NCOA2, BATF, TRIM16, NFAT5, ARID5A, TCERG1, FOXN3, LZTS1, OLIG1, ZNF488, DBX1, AEBP2, KLF6, ZFP42, ABRA, CREM, CTNNB1, SIK1, DAP, ARID3A, E2F5, AHR, EMX2, ETS2, ETV6, MECOM, ATOH7, IKZF2, SBNO2, ELL2, SPEN, FOXM1, ZHX3, FOXO1, FLI1, CAMTA1, RYBP, MYST4, ZNF281, ZBTB38, LASS6, ALX3, CCRN4L, GATA3, LHX6, SND1, FOXP1, HIPK2, HLF, FOXA2, HOXC4, HES1, ID2, RBPJ, INHBA, IRF…
adherens junction	0.0292008	CDH3, SORBS3, TNK2, FERMT2, MPP7, CTNNA1, CTNNB1, SYNE2, SYNM, GAK, SH3KBP1, LPP, SMAD7, LIMA1, ENAH, PTPRM, RHOU, TNS3, TRIM25, SRCIN1, PDLIM7, TJP2
developmental process	0.0313283	BCL2L11, CDH5, DNAJB6, NAMPT, PLXNC1, CDKN1C, IKZF1, CACNG2, SEMA4D, SH2B2, TRIM16, GNA13, FRS2, FERMT2, LZTS1, SLC26A8, OLIG1, ZNF488, DBX1, CLPTM1, TDRD9, CCR4, COL13A1, COL15A1, KLF6, ZFP42, SHROOM1, CREM, CRH, RTN4RL1, CTNNB1, SIK1, CNTN4, ADRB1, DAZL, ZFPM1, BMPER, GPR183, ECE1, AHR, SPRED2, ARL13B, EMX2, ENG, EPHB4, ETS2, ETV6, MECOM, EXT1, EXT2, EXTL1, UNC5B, SPATA19, ALDH1A3, ATOH7, GPC2,…
regulation of Ras protein signal transduction	0.0313283	ARFGEF1, SH2B2, ADAP1, AKAP13, ABRA, PLEKHG4B, ECT2, FOXM1, TBC1D9, TBC1D12, MCF2L, TBC1D22A, FBXO8, ABR, ECT2L, ITPKB, TBC1D13, RALGAPB, TBC1D14, RAC1, RAP1GAP, TIAM1, TTN, VAV2, GPR65, CYTH3, CYTH1, GPR55, ARHGEF10, USP6NL
positive regulation of biosynthetic process	0.034567	NAMPT, IKZF1, TRIM16, KLF6, ABRA, CTNNB1, ADRB1, DAZL, AHR, ENG, ETS2, MECOM, IKZF2, SCAP, FOXO1, MYST4, ZBTB38, HIPK2, MDFIC, FOXA2, HES1, RBPJ, INHBA, IRF4, JAK3, MAFA, LRP6, SMAD9, ATF1, NFIC, NFKB1, NFKBIA, NOTCH4, P2RX4, PAWR, PAX1, MLXIPL, KLF13, PLA2G4A, PIWIL2, ATF7IP, IL26, MAP2K3, ZMIZ1, ARID1B, MKL2, ZNF462, REL, ALX4, ATXN1, EBF2, SOD2, SOX4, SOX9, SS18, TAF2, TCF4, ZEB1, TEAD1, TLR1,…
positive regulation of cellular biosynthetic process	0.0345673	IKZF1, TRIM16, KLF6, ABRA, CTNNB1, ADRB1, DAZL, AHR, ENG, ETS2, MECOM, IKZF2, SCAP, FOXO1, MYST4, ZBTB38, HIPK2, MDFIC, FOXA2, HES1, RBPJ, INHBA, IRF4, JAK3, MAFA, LRP6, SMAD9, ATF1, NFIC, NFKB1, NFKBIA, NOTCH4, P2RX4, PAWR, PAX1, MLXIPL, KLF13, PLA2G4A, PIWIL2, ATF7IP, IL26, MAP2K3, ZMIZ1, ARID1B, MKL2, ZNF462, REL, ALX4, ATXN1, EBF2, SOD2, SOX4, SOX9, SS18, TAF2, TCF4, ZEB1, TEAD1, TLR1, ZNF148…
regulation of macromolecule metabolic process	0.035194	ZNF783, DNAJB6, PREB, FRY, NAMPT, SORBS3, TNK2, TRIB1, CDK8, CDKN1C, IKZF1, UBE2E3, NCOA2, BATF, TRIM16, NFAT5, ARID5A, TCERG1, WWP2, CHD3, FOXN3, LZTS1, CCDC101, ZNF257, ZNF618, IL22RA2, ZNF488, DBX1, AEBP2, TDRD9, ZFP3, KLF6, ZFP42, CPEB2, KLF14, ABRA, CREM, ZFP28, CSNK1E, ZFP90, ZNF565, UBE2U, CTNNB1, SIK1, ZNF746, DAP, DAZL, ZFPM1, BMPER, ASXL1, ARID3A, E2F5, ECE1, AHR, EIF5, EMX2, ENG, ERN1,…
cellular developmental process	0.0352656	CDKN1C, IKZF1, CACNG2, SEMA4D, SH2B2, TRIM16, GNA13, FRS2, FERMT2, LZTS1, SLC26A8, OLIG1, ZNF488, CLPTM1, TDRD9, CCR4, COL13A1, COL15A1, KLF6, SHROOM1, CREM, RTN4RL1, CTNNB1, SIK1, CNTN4, ADRB1, DAZL, GPR183, EMX2, ENG, ETV6, MECOM, EXT1, EXT2, UNC5B, SPATA19, ATOH7, GPC2, USP33, FLNB, FLT3, TDRD7, ALOX12, ATXN10, LHX6, GNAS, GPM6B, NUDT7, SLC9A10, GRIN2A, GSN, HIP1, ANXA13, FOXA2, HES1, ID2, GLD…
protein amino acid phosphorylation	0.0356742	TNK2, TRIB1, CDK8, FRS2, IL22RA2, CLK3, MAP3K8, PNCK, CSNK1A1, CSNK1E, CSNK1G3, SIK1, ADRBK2, DAPK1, BMPER, ENG, EPHB4, ERN1, FES, MAST1, ERC1, CDK19, FLT3, SIK3, GAK, GNAI2, HIPK2, GUCY2F, MDFIC, JAK3, MAST4, SBK1, SMAD7, SMAD9, MARK3, MAP3K4, NTRK3, MINK1, MLXIPL, CDK17, TAOK3, PDK1, ZAK, PPP2CA, PRKAR2B, PRKCH, MAP2K3, PRLR, TWF1, BCL2, RPS6KA1, RYK, SGK1, WNK1, WNK2, SPTBN1, SRC, SRPK2, NEK4,…
intracellular part	0.0367222	CDH3, KILLIN, BCL2L11, ZNF783, DNAJB6, ACTR2, PREB, ACTR1B, TRAP1, NAMPT, SORBS3, DDX39, TRIB1, CDK8, STAM2, STAG1, EFS, CDKN1C, SMNDC1, IKZF1, RRAGB, COX4NB, CDKN3, CACNG2, PECI, COG5, UBE2E3, C1orf61, NCOA2, BATF, HBXIP, RPP38, MTHFS, SH2B2, TGOLN2, TRIM16, CELF2, GNA13, POLD3, NFAT5, RAI1, NUP50, HSPH1, FRS2, TUBGCP2, ARID5A, TCERG1, CBX1, FERMT2, SF3B2, SLC27A3, KIF2C, RAB35, ADAP1, PAPD7, WW…
positive regulation of nitrogen compound metabolic process	0.0367222	IKZF1, TRIM16, KLF6, ABRA, CTNNB1, ADRB1, AHR, ENG, ETS2, MECOM, IKZF2, SCAP, FOXO1, MYST4, ZBTB38, HIPK2, MDFIC, FOXA2, HES1, RBPJ, INHBA, IRF4, JAK3, MAFA, LRP6, SMAD9, ATF1, NFIC, NFKB1, NFKBIA, NOTCH4, P2RX4, PAX1, MLXIPL, KLF13, UIMC1, ATF7IP, IL26, MAP2K3, ZMIZ1, ARID1B, MKL2, ZNF462, REL, ALX4, ATXN1, EBF2, SOD2, SOX4, SOX9, SS18, TAF2, TCF4, ZEB1, TEAD1, ZNF148, ZBTB17, PAX8, TBL1XR1, CSR…
cytoskeleton organization	0.037327	DNAJB6, SORBS3, SH2B2, TUBGCP2, FERMT2, KIF2C, FGFR1OP, SYNPO, SHROOM1, CTNNB1, GADD45A, EPB41L2, MAST1, LIMCH1, FLNB, SYNE2, CLASP1, SYNM, NPHP4, ANK1, METTL11A, GSN, KIF2A, ABLIM1, MAP4, MYO9B, LIMA1, ARHGAP17, CENPJ, ERBB2IP, ACTR3B, ERMN, RHOU, RAC1, BCL2, RDX, INF2, FSCN1, SPTAN1, SPTBN1, SS18, TTN, WIPF1, ARHGAP10, NUAK2, DTNBP1, BFSP2, NCK2, ABLIM2, GPR65, GAS7, NEURL, PDLIM7, TRIP10, ROCK…
positive regulation of macromolecule biosynthetic process	0.037327	NAMPT, IKZF1, TRIM16, KLF6, ABRA, CTNNB1, DAZL, AHR, ENG, ETS2, MECOM, IKZF2, SCAP, FOXO1, MYST4, ZBTB38, HIPK2, MDFIC, FOXA2, HES1, RBPJ, INHBA, IRF4, JAK3, MAFA, LRP6, SMAD9, ATF1, NFIC, NFKB1, NFKBIA, NOTCH4, PAWR, PAX1, MLXIPL, KLF13, PIWIL2, ATF7IP, IL26, MAP2K3, ZMIZ1, ARID1B, MKL2, ZNF462, REL, ALX4, ATXN1, EBF2, SOX4, SOX9, SS18, TAF2, TCF4, ZEB1, TEAD1, TLR1, ZNF148, ZBTB17, PAX8, TBL1XR…
cell differentiation	0.0416212	CDKN1C, IKZF1, CACNG2, SEMA4D, SH2B2, TRIM16, GNA13, FRS2, LZTS1, SLC26A8, OLIG1, ZNF488, CLPTM1, TDRD9, CCR4, COL13A1, COL15A1, KLF6, CREM, RTN4RL1, CTNNB1, SIK1, CNTN4, ADRB1, DAZL, GPR183, EMX2, ENG, ETV6, MECOM, EXT1, EXT2, UNC5B, SPATA19, ATOH7, GPC2, USP33, FLNB, FLT3, TDRD7, ALOX12, ATXN10, LHX6, GNAS, GPM6B, NUDT7, SLC9A10, GRIN2A, GSN, HIP1, ANXA13, FOXA2, HES1, ID2, GLDN, TUBB2B, RBPJ, …
embryonic hindlimb morphogenesis	0.0434659	CTNNB1, MECOM, ALX3, GNAS, LRP6, ALX4
actin cytoskeleton organization	0.0438148	SORBS3, SH2B2, FERMT2, SYNPO, SHROOM1, EPB41L2, LIMCH1, FLNB, NPHP4, GSN, MYO9B, LIMA1, ARHGAP17, ACTR3B, ERMN, RHOU, RAC1, BCL2, RDX, INF2, FSCN1, SPTAN1, SPTBN1, TTN, WIPF1, NUAK2, DTNBP1, NCK2, GPR65, GAS7, PDLIM7, TRIP10, ROCK2, MTSS1
kinase activity	0.0438148	TNK2, TRIB1, CDK8, CHKA, AKAP13, CLK3, MAP3K8, LRGUK, PNCK, CSNK1A1, CSNK1E, CSNK1G3, SIK1, ADRBK2, DAPK1, ENG, EPHB4, ERN1, FES, MAST1, CDK19, FLT3, SIK3, KCNH3, GAK, TPK1, HIPK2, GUCY2F, IGF2R, ITPKB, JAK3, MAST4, KCNH1, KCNH2, SBK1, MARK3, MAP3K4, MPP3, NTRK3, MINK1, CDK17, TAOK3, PDK1, ZAK, PFKP, PHKB, PRKCH, MAP2K3, TWF1, TRIM27, RPS6KA1, RYK, SGK1, WNK1, WNK2, SRC, SRPK2, NEK4, TEC, TGFA, T…
small GTPase mediated signal transduction	0.0438148	TNK2, ARFGEF1, SH2B2, GNA13, RAB35, AKAP13, ABRA, PLEKHG4B, ECT2, RAB18, FOXM1, SIPA1L3, RAP1GAP2, MCF2L, RASGRP3, FBXO8, RAB30, RAPGEF1, ABR, ECT2L, ITPKB, MYO9B, NGF, DNAJC27, RAB6B, PDK1, RAB20, C9orf86, RALGAPB, RHOU, RAC1, RALGDS, RAP1A, RAP1GAP, RREB1, RRAGC, SIAH2, RASAL3, SRC, TIAM1, TTN, VAV2, GARNL3, CYTH3, CYTH1, GPR55, RASAL2, ARHGEF10
nerve growth factor processing	0.047681	NGF, FURIN, PCSK5
positive regulation of metabolic process	0.0477096	NAMPT, TNK2, TRIB1, IKZF1, TRIM16, KLF6, ABRA, CSNK1E, CTNNB1, ADRB1, DAZL, ECE1, AHR, ENG, ETS2, MECOM, IKZF2, SCAP, FOXO1, MYST4, ALOX12, ZBTB38, LDLRAP1, GRB10, HIPK2, MDFIC, FOXA2, HES1, RBPJ, INHBA, IRF4, JAK3, JARID2, MAFA, LRP6, SMAD7, SMAD9, ATF1, NFIC, NFKB1, NFKBIA, NOTCH4, P2RX4, FURIN, PAWR, PAX1, MLXIPL, KLF13, UIMC1, PLA2G4A, PIWIL2, ATF7IP, IL26, MAP2K3, PSMC1, SMURF1, ZMIZ1, ARID1…
a False Discovery Rate.
