# Supplementary material for: Bacterial infection remodels the DNA methylation landscape of human dendritic cells
Source: HighWire-hosted journal article supplement (doi:10.1101/gr.192005.115), 2015-09-21
Supplement: TableS5_Footprints.xlsx [file TableS5_Footprints.xlsx]

## Sheet: Active binding
Supplementary Table 5-1: List of transcription factors ranked by statistical evidence of active binding in dendritic cells.
Motif name	Motif ID	P-value	Bonferroni P-value
CTCF	M01200	9.77e-146	1.9e-142
CTCF	M01259	8.35e-140	1.63e-136
/EMBO10/Spic_RC	PBM0133	5.62e-134	1.1e-130
/EMBO10/Spic	PBM0134	1.57e-133	3.06e-130
CTCF	MA0139.1	2.5e-124	4.86e-121
SPI-B	M01204	4.51e-122	8.8e-119
SPI1	M01203	4.98e-120	9.71e-117
Zfp206	M01742	1.16e-93	2.26e-90
REST	MA0138.2	6.11e-85	1.19e-81
NRF-1	M00652	1.77e-74	3.45e-71
/EMBO10/Elf5_RC	PBM0106	5e-70	9.74e-67
/EMBO10/Elf5	PBM0125	7.55e-67	1.47e-63
REST	M01256	1.14e-59	2.23e-56
Spic	M02042	7.14e-58	1.39e-54
Spi-B	M02041	1.7e-56	3.31e-53
SPI1	M02043	2.38e-55	4.63e-52
Sp1	M00932	4.31e-54	8.41e-51
NRSF	M00256	1.45e-51	2.83e-48
Elf-1	M00746	1.25e-47	2.44e-44
/EMBO10/Sfpi1	PBM0136	1.32e-47	2.57e-44
PEA3	M01991	9.05e-47	1.76e-43
GABPA	MA0062.2	8.8e-46	1.72e-42
GABP	M01258	8.79e-45	1.71e-41
/EMBO10/Sfpi1_RC	PBM0111	5.05e-44	9.83e-41
GC	M00255	4.5e-40	8.76e-37
NRSF	M01028	1.65e-39	3.22e-36
NRSE	M00325	2.13e-39	4.16e-36
/EMBO10/Elf4	PBM0124	6.2e-39	1.21e-35
/EMBO10/Elf2	PBM0122	4.81e-38	9.37e-35
GABP-beta	M01876	4.95e-38	9.65e-35
Fli-1	M02038	2.69e-35	5.25e-32
SP2	M01783	1e-33	1.95e-30
/EMBO10/Erg	PBM0121	2.3e-33	4.49e-30
NF-kappaB	M00774	2.85e-32	5.56e-29
Erm	M01992	8.72e-32	1.7e-28
ERG	M01985	2.15e-31	4.19e-28
Pet-1	M02037	1.39e-30	2.7e-27
c-Ets-1(p54)	M00032	8.12e-30	1.58e-26
/EMBO10/Elf2_RC	PBM0113	8.28e-30	1.61e-26
FLI1	M01208	1.29e-29	2.52e-26
Ets2	M01989	2.17e-29	4.24e-26
RELA	MA0107.1	2.46e-28	4.79e-25
/EMBO10/Elf4_RC	PBM0118	3.1e-28	6.03e-25
/EMBO10/Erg_RC	PBM0096	6e-28	1.17e-24
IRF	M00772	7.96e-28	1.55e-24
Sp1	M00933	1.16e-27	2.27e-24
NF-kappaB (p65)	M00052	3.23e-27	6.29e-24
NF-E2	M00037	1.26e-26	2.46e-23
REL	MA0101.1	3.42e-26	6.67e-23
Net	M01982	4e-26	7.8e-23
E74A	M00016	4.95e-26	9.66e-23
ELF1	M01975	1.39e-25	2.72e-22
SP1	MA0079.2	2.24e-25	4.36e-22
ETV3	M01990	3.01e-25	5.87e-22
Bach1	M00495	3.18e-25	6.2e-22
c-Rel	M00053	5.26e-25	1.03e-21
ELF4	M01979	1.18e-24	2.31e-21
ICSBP	M00699	3.72e-24	7.26e-21
RelB:p52	M01239	4.02e-24	7.84e-21
EGR1/	M01972	4.66e-24	9.09e-21
/EMBO10/Gabpa_RC	PBM0109	6.52e-24	1.27e-20
/EMBO10/Fli1	PBM0114	7.03e-24	1.37e-20
GABPalpha	M02039	7.5e-24	1.46e-20
ER81	M01987	9.24e-24	1.8e-20
/EMBO10/Etv5	PBM0104	9.64e-24	1.88e-20
/EMBO10/Elk1	PBM0129	1.13e-23	2.21e-20
Elk-1	M01165	2.17e-23	4.23e-20
SAP-1a	M01167	2.36e-23	4.6e-20
c-ets-1	M01986	4.44e-23	8.65e-20
TEL1	M01993	4.58e-23	8.92e-20
/EMBO10/Elk3	PBM0130	4.59e-23	8.94e-20
ER71	M01988	6.54e-23	1.28e-19
Bach2	M00490	1.14e-22	2.23e-19
NF-kappaB	M00194	1.2e-22	2.34e-19
ELK4	MA0076.1	1.73e-22	3.37e-19
/EMBO10/Etv5_RC	PBM0116	2.25e-22	4.38e-19
/EMBO10/Gm5454	PBM0126	2.3e-22	4.49e-19
/EMBO10/Elk4	PBM0131	2.52e-22	4.92e-19
CREM	M01820	2.76e-22	5.38e-19
/EMBO10/Elk1_RC	PBM0119	3.54e-22	6.91e-19
GABP	M00341	5.19e-22	1.01e-18
/EMBO10/Etv1_RC	PBM0095	1.28e-21	2.49e-18
CREB	M00178	1.3e-21	2.54e-18
ELF2	M01976	1.88e-21	3.67e-18
CREB	M00916	2.57e-21	5.02e-18
CREB,	M00981	4.37e-21	8.51e-18
/EMBO10/Gabpa	PBM0101	4.79e-21	9.34e-18
/EMBO10/Ehf_RC	PBM0120	5.39e-21	1.05e-17
ERG	M01752	7.32e-21	1.43e-17
NF-kappaB	M00208	9.4e-21	1.83e-17
/EMBO10/Etv6	PBM0105	1.06e-20	2.07e-17
IRF1	MA0050.1	1.31e-20	2.56e-17
/EMBO10/Ehf	PBM0117	1.39e-20	2.7e-17
/EMBO10/Etv4	PBM0103	1.94e-20	3.78e-17
/EMBO10/Elk3_RC	PBM0128	3e-20	5.85e-17
WT1	M02036	4.06e-20	7.91e-17
P50:P50	M01223	8.7e-20	1.69e-16
/EMBO10/Etv1	PBM0100	7.67e-19	1.49e-15
AP-1	M00517	7.9e-19	1.54e-15
GCN4	M00038	8.11e-19	1.58e-15
Egr-3	M00245	1.16e-18	2.27e-15
GCN4	M01555	1.85e-18	3.61e-15
NF-Y	M00287	2.13e-18	4.15e-15
/EMBO10/Gm5454_RC	PBM0135	2.27e-18	4.42e-15
/EMBO10/Fli1_RC	PBM0107	2.85e-18	5.56e-15
/EMBO10/Ets1_RC	PBM0112	3.89e-18	7.59e-15
ELF5	M01197	4.64e-18	9.05e-15
TFEB	M01768	5e-18	9.74e-15
/EMBO10/Etv4_RC	PBM0132	5.02e-18	9.79e-15
CREB	M00917	5.11e-18	9.96e-15
GCN4	M00204	5.2e-18	1.01e-14
Ets	M00771	6.61e-18	1.29e-14
/GR09/Gcn4	PBM0074	7.1e-18	1.38e-14
ERF	M01984	1.06e-17	2.07e-14
NFKB1	MA0105.1	1.57e-17	3.06e-14
FRA1	M01267	1.74e-17	3.39e-14
CREB	M00039	1.77e-17	3.46e-14
GCN4	M01713	2.72e-17	5.31e-14
Elk-1	M00007	4.03e-17	7.86e-14
Egr-2	M00246	9.77e-17	1.9e-13
Pitx2	M00482	1.8e-16	3.51e-13
/EMBO10/Ets1	PBM0098	1.95e-16	3.81e-13
Elk-1	M01163	2.17e-16	4.24e-13
STF1	M01187	3.56e-16	6.94e-13
STF1	M01186	4.56e-16	8.88e-13
/EMBO10/Etv3	PBM0102	9.07e-16	1.77e-12
AP-1	M00199	1.19e-15	2.31e-12
TGA2	M01586	1.28e-15	2.5e-12
ELF3	M01977	3.65e-15	7.12e-12
/EMBO10/Elk4_RC	PBM0115	7.52e-15	1.47e-11
/EMBO10/Elf3	PBM0123	1.18e-14	2.29e-11
ATF3	M00513	1.25e-14	2.44e-11
Tel-2	M00678	1.32e-14	2.57e-11
/EMBO10/Etv6_RC	PBM0094	1.42e-14	2.77e-11
SAP1A	M01983	1.7e-14	3.31e-11
ISGF-3	M00258	1.71e-14	3.33e-11
NRF-2/GABP	M00108	1.9e-14	3.71e-11
c-Ets-1	M00339	3.56e-14	6.95e-11
c-Ets-1	M01078	4.47e-14	8.72e-11
IRF2	MA0051.1	5.36e-14	1.05e-10
NFE2L2	MA0150.1	5.89e-14	1.15e-10
UGA3	M01622	7.57e-14	1.48e-10
RSC30	M01899	8.07e-14	1.57e-10
AP-1	M00174	9.51e-14	1.85e-10
TGA1b	M00375	1.06e-13	2.06e-10
NFYA	MA0060.1	1.62e-13	3.15e-10
v-Jun	M00036	2.39e-13	4.67e-10
ATF	M00017	2.43e-13	4.73e-10
KROX	M00982	2.56e-13	5e-10
SP4	M01273	2.78e-13	5.42e-10
ELK-1	M01981	3.56e-13	6.93e-10
SP1:SP3	M01219	3.61e-13	7.04e-10
CHA4	M01916	5.42e-13	1.06e-09
Elk-1	M00025	5.73e-13	1.12e-09
ATF-2	M01862	6.49e-13	1.26e-09
NF-kappaB	MA0061.1	6.97e-13	1.36e-09
AP-1	M00926	7.46e-13	1.45e-09
ATF	M00338	7.65e-13	1.49e-09
ELF5	M01980	8.84e-13	1.72e-09
MafK	M02022	1.77e-12	3.45e-09
NF-kappaB	M00054	1.87e-12	3.65e-09
/GR09/Rsc30	PBM0053	3.21e-12	6.25e-09
CREB	M00177	6.58e-12	1.28e-08
/EMBO10/Gm4881_RC	PBM0097	1.72e-11	3.35e-08
NGFI-C	M00244	1.82e-11	3.55e-08
Stra13	M00985	2.67e-11	5.21e-08
CPRF-2	M00945	3.7e-11	7.22e-08
Egr-1	M00243	6.18e-11	1.21e-07
EHF	M01974	6.47e-11	1.26e-07
RFX1	M00281	6.66e-11	1.3e-07
RSC30	M01520	7.1e-11	1.38e-07
Sp1	M00931	8.52e-11	1.66e-07
GKLF	M01588	8.59e-11	1.67e-07
MAF	M00983	1.18e-10	2.3e-07
Nrf-2	M00821	1.26e-10	2.46e-07
E2F-1	M00938	2.86e-10	5.57e-07
RITA-1	M00660	5.45e-10	1.06e-06
/EMBO10/Etv3_RC	PBM0108	6.79e-10	1.32e-06
ATF-3	M01863	1.01e-09	1.97e-06
/GR09/Yll054c	PBM0068	1.22e-09	2.37e-06
/Cell09/HLH-30_RC	PBM0141	1.81e-09	3.53e-06
Cha4	M01518	1.84e-09	3.59e-06
/Cell09/HLH-30	PBM0177	1.98e-09	3.86e-06
TBS1	M01936	2.68e-09	5.23e-06
UME6	M01898	2.81e-09	5.48e-06
ELF5	MA0136.1	3.31e-09	6.45e-06
/GR09/Cha4	PBM0086	3.36e-09	6.54e-06
Sp1	M00196	4.16e-09	8.11e-06
USF	M00187	5.55e-09	1.08e-05
NF-kappaB (p50)	M00051	5.69e-09	1.11e-05
ELK1	MA0028.1	5.74e-09	1.12e-05
Yll054c	M01509	5.85e-09	1.14e-05
Arnt	M00539	7.15e-09	1.39e-05
znf143	MA0088.1	7.36e-09	1.44e-05
P50:RELA-P65	M01224	8.53e-09	1.66e-05
CREB	M00113	1.01e-08	1.96e-05
ABI4	M00958	1.26e-08	2.46e-05
CBF1	M00303	1.56e-08	3.04e-05
TCF11:MafG	M00284	1.79e-08	3.49e-05
CBF1	M01794	2.1e-08	4.1e-05
Stp2	M01560	2.38e-08	4.64e-05
/Cell09/HLH-4_RC	PBM0190	2.9e-08	5.66e-05
ATF2	M00179	3.07e-08	5.98e-05
CPRF-3	M00944	3.74e-08	7.29e-05
alpha-CP1	M00687	4.27e-08	8.33e-05
/GR09/Stp2	PBM0041	5.98e-08	0.00011654
CPRF-2	M00371	6.74e-08	0.000131407
BRF-1	M01747	7.26e-08	0.000141589
PDR1	M01633	8.09e-08	0.000157729
RDS1	M01531	8.51e-08	0.000165816
Egr1	MA0162.1	1.03e-07	0.000201381
DEAF1	M01001	1.05e-07	0.000204533
/GR09/Rds1	PBM0056	1.2e-07	0.00023309
Rgt1	M01557	1.38e-07	0.000269907
c-Ets-2	M00340	1.59e-07	0.000310679
/GR09/Tye7	PBM0063	2e-07	0.000389646
CEP3	M01544	2.31e-07	0.000450725
PDEF	M02040	2.44e-07	0.000476015
IRF-1	M00062	2.68e-07	0.000521492
Tye7	M01558	2.7e-07	0.000526361
ATF1	M00691	2.7e-07	0.000527166
ATF-1	M01861	2.85e-07	0.000555045
IRF-2	M00063	2.85e-07	0.000555514
MIG1	M01961	3.71e-07	0.000722487
/GR09/Rsc3	PBM0052	4.6e-07	0.000897286
Rb:E2F-1:DP-1	M00740	6.55e-07	0.00127582
SREBP-1	M00220	7.01e-07	0.00136597
/EMBO10/Gm4881	PBM0127	7.91e-07	0.00154182
LEU3	M00306	1.02e-06	0.0019855
/NBT06/Zif268	PBM0203	1.25e-06	0.00243228
Rsc3	M01551	2.2e-06	0.00427871
YY1	M01035	2.29e-06	0.00445541
/GR09/Rgt1	PBM0012	2.5e-06	0.00486964
HY5	M01584	2.96e-06	0.00576226
Staf	M00262	3e-06	0.00585146
E2F-1	M00431	3.24e-06	0.00631676
MAF	M00648	3.44e-06	0.00669848
E2F-1	M00940	3.45e-06	0.00671616
Whn	M00332	3.59e-06	0.00699079
Klf4	MA0039.2	3.61e-06	0.00703429
/GR09/Hal9	PBM0007	3.66e-06	0.00713754
MIZF	M01182	3.76e-06	0.00732998
Put3	M01525	4.57e-06	0.00889967
SQUA	M01164	4.91e-06	0.00956298
/GR09/Ykl222c	PBM0022	5.24e-06	0.0102126
Yrr1	M01511	5.62e-06	0.0109462
SRF	M00152	6.52e-06	0.0127081
/GR09/Cep3	PBM0060	6.61e-06	0.0128895
ZF5	M00716	6.69e-06	0.0130344
HAC1	M01610	6.85e-06	0.0133581
Ykl222c	M01960	7.86e-06	0.01531
ARR10	M01050	8.34e-06	0.016251
USF	M00121	9.83e-06	0.0191494
NF-1	M00806	1.1e-05	0.0214674
UAY	M00391	1.29e-05	0.0251613
YRM1	M01932	1.35e-05	0.0262235
LYS14	M01946	1.42e-05	0.0275929
E2F	M00425	1.45e-05	0.0282982
MEF-2	M00231	1.61e-05	0.0313128
CBF1	M01911	1.78e-05	0.0346606
TAF-1	M00369	1.92e-05	0.037405
PDR8	M01613	1.97e-05	0.038394
CEP3	M01852	2.41e-05	0.0470519
E2F	M00516	2.49e-05	0.0484527
SRF	MA0083.1	2.77751e-05	0.0541337
PPAR	M00528	2.90284e-05	0.0565763
/GR09/Put3	PBM0087	2.92757e-05	0.0570584
GT-1	M01827	2.97459e-05	0.0579747
XBP1	M00683	3.15099e-05	0.0614129
XBP1	M01770	3.19614e-05	0.0622927
PHO4	M00064	3.26829e-05	0.0636991
EKLF	M01874	3.4148e-05	0.0665544
/GR09/Sip4	PBM0085	3.47254e-05	0.0676799
CST6	M01615	3.56988e-05	0.069577
NF-Y	M00775	3.59763e-05	0.0701178
2014-12-02	M01843	3.61798e-05	0.0705144
USF	M00796	3.65205e-05	0.0711784
E2F	M00427	3.76579e-05	0.0733952
LEU3	M01629	3.8251e-05	0.0745513
bZIP910	M00357	3.91784e-05	0.0763587
/GR09/Gsm1	PBM0010	4.28257e-05	0.0834673
cebpe	M01772	4.49273e-05	0.0875633
/EMBO10/Elf3_RC	PBM0137	4.72965e-05	0.0921809
Cap1	M01795	4.98347e-05	0.0971278
E2F1	MA0024.1	5.05874e-05	0.0985949
MEF-2	M00232	5.25009e-05	0.102324
MOVO-B	M01104	5.4428e-05	0.10608
AP-1	M00925	5.45138e-05	0.106247
Rds2	M01571	5.85096e-05	0.114035
/GR09/Yrr1	PBM0079	5.8863e-05	0.114724
ZF5	M00333	6.06184e-05	0.118145
C/EBP	M00912	6.52191e-05	0.127112
DAL81	M01690	6.6113e-05	0.128854
ERF1	M01999	6.61537e-05	0.128934
DMRT4	M01149	7.92919e-05	0.15454
MIZF	MA0131.1	8.13398e-05	0.158531
HIF-1alpha	M02012	8.23419e-05	0.160484
LEU3	M01833	9.2701e-05	0.180674
Staf	M00264	9.27395e-05	0.180749
STB4	M01636	0.000102223	0.199233
Mig3	M01924	0.000105003	0.204652
BDP1	M01796	0.000105227	0.205087
/GR09/Rds2	PBM0057	0.000106975	0.208493
E2F	M00920	0.000108094	0.210675
STAT6	M00500	0.00010957	0.213552
YLR278C	M01648	0.000115489	0.225088
RSC3	M01934	0.000116865	0.22777
AP-1	M00924	0.000120108	0.23409
FHL1	M01948	0.000121476	0.236757
Pax-3	M00327	0.0001253	0.244209
ABF	M00442	0.000126354	0.246265
Hairy	M00067	0.000133027	0.25927
VDR:RXR	M01202	0.000133837	0.260849
RXRA::VDR	MA0074.1	0.000133837	0.260849
/GR09/Tbs1	PBM0043	0.000134646	0.262425
Ykl222c	M01495	0.000139206	0.271312
/NBT06/Cbf1	PBM0200	0.000141427	0.275641
HOXC11	M01329	0.00014208	0.276914
core-binding	M00722	0.000143006	0.278718
E2F	M00426	0.000145189	0.282973
C/EBPbeta	M00117	0.000147538	0.287551
E4F1	M00694	0.000150084	0.292514
HOXC10	M01361	0.000169198	0.329767
HAP2/3/4	M00288	0.000169283	0.329933
v-Maf	M00035	0.000171149	0.333569
dl	M00043	0.000174248	0.33961
CP2	M00072	0.00017442	0.339945
LRF	M01100	0.000199883	0.389573
/GR09/Fhl1	PBM0081	0.000205257	0.400045
Sip4	M01517	0.000208139	0.405663
ZMS1	M01617	0.000221144	0.431009
NKX22	M01372	0.000222197	0.433061
CBT	M01179	0.000233439	0.454972
bHLH66	M01054	0.000237593	0.463069
/GR09/Asg1	PBM0034	0.000241134	0.469971
/GR09/Skn7	PBM0021	0.000244599	0.476723
CBF1	M01793	0.000248128	0.483602
MEF2A	M01301	0.000251862	0.490878
AML	M00769	0.000254643	0.4963
EDS1	M01644	0.000255199	0.497382
PIF3	M00434	0.000264334	0.515186
/Cell09/HLH-19_RC	PBM0154	0.000266109	0.518646
/Cell09/HLH-19	PBM0170	0.000266109	0.518646
NHP10	M01643	0.000271689	0.529521
OPI1	M01681	0.000277359	0.540573
Hal9	M01563	0.000277693	0.541224
AP-1	M00173	0.000282054	0.549723
GBF1	M01838	0.000292626	0.570329
Mat1-Mc	M00276	0.000305336	0.5951
STP1	M01685	0.000318417	0.620595
E2F	M00918	0.000321704	0.627001
Yll054c	M01944	0.000328953	0.64113
Skn7	M01535	0.00033259	0.648218
EmBP-1	M00366	0.000334932	0.652782
GCR1	M00337	0.000340063	0.662783
/GR09/Nhp6b	PBM0051	0.000349177	0.680547
E2L	M01839	0.000358322	0.698369
/GR09/Ygr067c	PBM0020	0.000362845	0.707185
/Cell09/HLH-4	PBM0151	0.000370643	0.722382
YY1	M00793	0.000376417	0.733636
HAP1	M01642	0.000387713	0.755653
RPN4	M01925	0.000392174	0.764348
E2F	M01114	0.000417712	0.814121
REX1	M01744	0.000420009	0.818597
Zfp281	M01597	0.000420583	0.819717
TAF-1	M00943	0.000435684	0.849147
PHO4	M01938	0.000443346	0.864082
USF2	M00726	0.000449245	0.875578
Asg1	M01500	0.000456273	0.889276
OCSBF-1	M00653	0.000463931	0.904202
HOXA11	M01378	0.000464126	0.904582
E2F-1:DP-1	M00736	0.00047186	0.919655
XBP1	M01947	0.00048288	0.941134
ADR1	M00048	0.000491329	0.9576
NF-1	M00193	0.000531161	1
NF-muE1	M00651	0.000537975	1
CPRF-1	M01818	0.00053861	1
Lim-1	M01418	0.000539985	1
SGC1	M01954	0.000546142	1
ERR	M00511	0.000564085	1
SRF	M01304	0.000581468	1
HBP-1a	M00367	0.000633804	1
Gsm1	M01499	0.000665727	1
HEB	M00698	0.000685542	1
TR4	M01782	0.000707917	1
SP1	M01303	0.000715276	1
ATF6	M00483	0.000746013	1
REB1	M01736	0.000793797	1
Sum1	M01527	0.000815101	1
ATF4	M00514	0.000826807	1
Ypr013c	M01929	0.000861185	1
E2F	M00919	0.000871859	1
WT1	M01118	0.00090487	1
c-Ets-1(p54)	M00074	0.000916445	1
STP4	M01635	0.000981088	1
PUT3	M01909	0.000982168	1
Ygr067c	M01530	0.000995496	1
COUP	M00765	0.0010066	1
Gsm1	M01903	0.00102617	1
/Cell09/MDL-1	PBM0192	0.00103499	1
Tax/CREB	M00114	0.00103927	1
SRF	M00215	0.00104662	1
BRK	M01096	0.00105139	1
Xbp1	M01513	0.00109506	1
AML1a	M00271	0.00110918	1
HIF1	M00797	0.00112805	1
Ybr239c	M01516	0.00118057	1
SPL14	M01180	0.00118597	1
Zta	M00711	0.00124136	1
ETF	M00695	0.00130314	1
/GR09/Leu3	PBM0017	0.00134457	1
Alfin1	M00479	0.00140724	1
E2F-1:DP-2	M00737	0.001445	1
AP-1	M00172	0.00145527	1
ER	M00191	0.00152175	1
PPAR	M00763	0.00160857	1
GCR1	M01729	0.00164598	1
Otx3	M01403	0.00165708	1
LHX3b	M01971	0.00166497	1
RFX1	M00280	0.00169243	1
MAZ	M02023	0.00169348	1
MAZR	M00491	0.00170338	1
SIP4	M01958	0.00170778	1
Myc	M00799	0.0017184	1
c-Myc:Max	M00118	0.00175144	1
NF-Y	M00209	0.00176931	1
MAX	MA0058.1	0.00178359	1
Fhl1	M01543	0.00179554	1
Ebox	M01034	0.00189446	1
T3RALPHA	M01724	0.00194794	1
Zfx	M01593	0.00198305	1
/GR09/Sfp1	PBM0039	0.00208431	1
AhR	M00778	0.00210512	1
RIN	M01809	0.00212721	1
AGL3	M00393	0.00216993	1
AGL3	M01064	0.00216993	1
IPF1	M01275	0.00225333	1
Arnt	M00236	0.00227486	1
STAT1	MA0137.2	0.00228419	1
/Cell09/CND-1_RC	PBM0197	0.00228483	1
Tbs1	M01579	0.0022918	1
LXR	M00766	0.0023523	1
Pbx	M01967	0.00239612	1
E2F-1	M00939	0.00241766	1
RGT1	M01965	0.00244492	1
RXR:LXR-beta	M01198	0.0025095	1
CEBP	M01087	0.00253337	1
STAT1	M00492	0.00258355	1
TEA1	M01933	0.00259081	1
PPAR,	M00762	0.00259869	1
/GR09/Cbf1	PBM0013	0.00263293	1
RUNX1	MA0002.2	0.0026512	1
GAL4	M01561	0.0026852	1
/GR09/Gal4	PBM0037	0.00269183	1
CDP	M00104	0.00269743	1
E2F-4:DP-1	M00738	0.00277522	1
IRF-7	M00453	0.00278608	1
TR4	M01725	0.00279194	1
Lys14	M01576	0.00280648	1
HOXB13	M01467	0.00281189	1
Ybr239c	M01949	0.00282788	1
RDR1	M01512	0.00285893	1
TGA1a	M00376	0.00285928	1
STAT1	M00224	0.00289219	1
STE12	M00664	0.00291026	1
C/EBPdelta	M00621	0.00293649	1
TBP	M00471	0.00295247	1
C/EBP	M00770	0.00298147	1
MIF-1	M00279	0.00307751	1
E2F-4:DP-2	M00739	0.00309805	1
/GR09/Rdr1	PBM0054	0.00315405	1
2014-10-01	M00162	0.00322496	1
Pax2	MA0067.1	0.00327881	1
NF-Y	M00185	0.00328839	1
Rim101p	M01030	0.0033021	1
BEN	M01241	0.00341076	1
ZNF219	M01122	0.00346742	1
c-Myc:Max	M00123	0.00354935	1
TCF-4	M01705	0.00358912	1
GBF	M00441	0.00359778	1
HBP-1b	M00697	0.00360872	1
/GR09/Ecm22	PBM0084	0.00361124	1
DREB1B	M01700	0.00365793	1
Churchill	M00986	0.00367593	1
c-Maf	M01070	0.0036775	1
HOXA4	M01370	0.00372531	1
/Cell09/CND-1	PBM0199	0.00372673	1
MEF-2	M00006	0.00377807	1
MECP2	M01299	0.00381695	1
Dbx-1	M01483	0.00396516	1
FXR	M00767	0.0039983	1
HAP1	M00305	0.00404203	1
STAT5A	M00457	0.00415442	1
Tal-1	M01591	0.00420115	1
LEU3	M01546	0.00431977	1
SOX2	M01272	0.00432542	1
PNR	M01650	0.00432792	1
PEBP	M00984	0.00433041	1
2014-10-01	M00137	0.00443966	1
STAT3	M00225	0.00445486	1
/GR09/Pdr1	PBM0035	0.00454667	1
SOX5	M00042	0.00455067	1
Nkx2-2	M00485	0.00456421	1
/GR09/Nhp6a	PBM0050	0.00458904	1
/EMBO10/Spdef	PBM0110	0.00463641	1
ETS2	M01207	0.0046507	1
CAT8	M01663	0.0047525	1
CACCC-binding	M00721	0.00475997	1
SWI4	M02032	0.00481459	1
Poly	M00211	0.00483968	1
myogenin	M00056	0.00497517	1
STAT5A	M01890	0.00499538	1
FXR	M01268	0.00503379	1
/Cell09/MDL-1_RC	PBM0187	0.00506963	1
ATF-4	M01864	0.00531909	1
YER184C	M01634	0.00538056	1
Nhp6a	M01532	0.00540302	1
PDR3	M00752	0.00552438	1
LBP-1	M00644	0.00562066	1
OCT-x	M00210	0.00564656	1
SKN7	M01638	0.00569645	1
/Cell09/MXL-3	PBM0195	0.00570004	1
HNF-3gamma	M02015	0.0059288	1
GEN_INI	M00315	0.00598153	1
Ydr520c	M01920	0.00605831	1
Adf-1	M00171	0.00608766	1
AtMYB-84	M00970	0.00622459	1
AIRE	M01000	0.00629647	1
CKROX	M01175	0.00633016	1
NR1H2::RXRA	MA0115.1	0.00637641	1
ces-2	M00398	0.00658927	1
c-Myc:Max	M00322	0.00662386	1
HOXA4	M00640	0.00675449	1
NR4A2	MA0160.1	0.00684463	1
PUR1	M01721	0.0071264	1
Nhp6b	M01504	0.00712688	1
Ecm22	M01541	0.00713274	1
Max	M00119	0.00715716	1
Pit-1	M00802	0.00717959	1
ZAP1	M00735	0.00726095	1
atf1:pcr1	M01600	0.00739666	1
PLAG1	MA0163.1	0.00744082	1
CEBPE	M01868	0.00751436	1
/GR09/Aro80	PBM0009	0.00753796	1
ADR1	M01845	0.00756795	1
MyoD	M00184	0.00766496	1
/Cell09/HLH-2_HLH-3_RC	PBM0140	0.00767683	1
/Cell09/HLH-2_HLH-3	PBM0156	0.00767684	1
STAT1	M01823	0.00772946	1
TBP	M00713	0.00773097	1
MZF1_1-4	MA0056.1	0.00793204	1
DEAF1	M01002	0.00795618	1
CBF1	M01577	0.00800354	1
dri	M00455	0.00815777	1
2014-10-01	M00342	0.00819461	1
dl	M00120	0.00820214	1
NERF1a	M00531	0.00827546	1
RPC155	M01798	0.00830058	1
STAT3	M01595	0.00843039	1
ARG	M01673	0.00859197	1
RBP-Jkappa	M01112	0.00864742	1
PBF1	M01927	0.008731	1
SEF-1	M00214	0.00881214	1
c-Myc:Max	M00615	0.00918874	1
GAMYB	M00345	0.00933775	1
Lhx5	M01353	0.00939268	1
SPI1	M02031	0.0094251	1
v-ErbA	M00239	0.0094792	1
Ygr067c	M01942	0.0096753	1
/GR09/Lys14	PBM0093	0.00971728	1
BRCA1	MA0133.1	0.00977008	1
COUP-TF,	M00158	0.0100116	1
NR2F1	MA0017.1	0.0100116	1
AP-4	M00176	0.010034	1
Opaque-2	M00372	0.0101	1
2014-10-01	M00248	0.0101759	1
Aro80	M01538	0.0102034	1
ATF5	M01295	0.0103029	1
/Cell09/MXL-3_RC	PBM0175	0.0106536	1
Obox2	M01364	0.0107724	1
HSF1	M00146	0.0107755	1
Tea1	M01497	0.0108392	1
DAL80	M01619	0.0108525	1
AP-2	M00189	0.0110254	1
FOXA1	MA0148.1	0.0110918	1
/GR09/Xbp1	PBM0082	0.011266	1
RFX1	M00626	0.0113852	1
Stb3	M01514	0.011447	1
MTF1	M01243	0.0114617	1
lmx1b	M01363	0.0115265	1
MIG2	M01966	0.0115965	1
Freac-2	M00290	0.0116407	1
STAT5B	M00459	0.0117302	1
PIF1	M01585	0.0119412	1
HOXD10	M01375	0.0121579	1
HIF-2alpha	M01249	0.0121871	1
Neuro	M01287	0.0123771	1
UPC2	M01784	0.0124367	1
ZBP89	M01816	0.0126092	1
p53	M01652	0.0126231	1
PPARG	MA0066.1	0.0128026	1
Nrg1	M01545	0.0131386	1
GCR1	M00046	0.0132632	1
CCAAT	M00254	0.013805	1
Muscle	M00320	0.0138078	1
BR-C	M00092	0.0138356	1
HBP-1a	M00936	0.0138721	1
AP-2alpha	M01857	0.0138983	1
Irx-3	M01485	0.0140694	1
CF2-II	M00013	0.0141378	1
AFT2	M01611	0.0142872	1
Roaz	M00467	0.0143202	1
/GR09/Ypr013c	PBM0064	0.0145623	1
GBP	M00182	0.0146485	1
Evi-1	M00011	0.0146553	1
AML1	M01658	0.0149707	1
HOXB9	M01426	0.0151119	1
c-Myc	M01145	0.015372	1
HOXD11	M01434	0.0154376	1
RAP1	M01787	0.0155411	1
AGL2	M01062	0.0155458	1
Athb-1	M00089	0.0158266	1
/GR09/Ybr239c	PBM0065	0.0161067	1
AML2	M01854	0.0161517	1
INO2	M01671	0.0161704	1
Ik-2	M00087	0.0162895	1
CPRF-1	M00942	0.0166165	1
HMGA2	M01300	0.0167101	1
AREB6	M00413	0.0167458	1
IFH1:FHL1	M01790	0.0168709	1
Lentiviral	M00331	0.017091	1
Octamer	M00795	0.017109	1
LXR,	M00965	0.017386	1
TCP15	M01848	0.0174987	1
dlx3	M01400	0.0175527	1
AP-1	M00188	0.0176342	1
Sn	M00060	0.0177919	1
SRF	M00810	0.018057	1
/Cell09/HLH-10_RC	PBM0196	0.018082	1
GBF1	M01806	0.0184889	1
POU2F3	M01476	0.0187618	1
Abd-B	M01094	0.0188461	1
SATB1	M01723	0.0189499	1
Pax-2	M00098	0.0189587	1
ADR1	M01623	0.0189699	1
CF1	M00112	0.0190479	1
ABI5	M01995	0.0193548	1
PLAG1	M01778	0.020019	1
AhR	M00139	0.020062	1
HNF3alpha	M00724	0.0202512	1
/Cell09/HLH-10	PBM0166	0.0203742	1
SBF-1	M00149	0.0204939	1
AML1	M00751	0.0205958	1
Gfi	MA0038.1	0.0206728	1
FOXP1	M00987	0.020703	1
SATB1	M02030	0.0210878	1
/Cell09/HLH-11_RC	PBM0179	0.0218251	1
Prop-1	M01320	0.0219134	1
NFE2L1::MafG	MA0089.1	0.021927	1
N-Myc	M00055	0.0222561	1
Ypr013c	M01539	0.0227291	1
Pax-7	M01339	0.0228674	1
UF1H3BETA	M01068	0.022946	1
AhR:Arnt	M00237	0.0231299	1
Croc	M00266	0.0231768	1
SD	M01102	0.0233018	1
BCL6	M01183	0.0233232	1
STAT	M00259	0.0233936	1
NF-AT	M00935	0.0234471	1
SFP1	M01528	0.0243483	1
USF1	MA0093.1	0.0255702	1
INSM1	MA0155.1	0.0257519	1
ABZ1	M01065	0.0259427	1
TEC1	M01955	0.0259587	1
MYF	M01302	0.0261002	1
Myf	MA0055.1	0.0261002	1
DMRT3	M01148	0.0263506	1
PPARgamma:RXRalpha	M00512	0.0265996	1
StuAp	M00263	0.0266189	1
/Cell09/LIN-32	PBM0161	0.0268713	1
PARP	M01211	0.0269063	1
avian	M00311	0.0269299	1
Yer130c	M01956	0.0270305	1
STP3	M01649	0.0270405	1
Ftz	M00020	0.0271462	1
CTF1	M01196	0.0272371	1
TLX1::NFIC	MA0119.1	0.0272371	1
HSF	M00169	0.0273098	1
/GR09/Sum1	PBM0055	0.0274931	1
/GR09/Rpn4	PBM0027	0.028025	1
CACD	M01113	0.0280416	1
YRR1	M01957	0.0280675	1
Pax-4	M00380	0.0284489	1
Pbx-1	M00096	0.0285461	1
Egr	M00807	0.028658	1
/GR09/Ypr196w	PBM0044	0.0290408	1
PXR	M01153	0.0295312	1
RBP-Jkappa	M01111	0.0295927	1
ER-beta	M01875	0.0299331	1
MAZ	M00649	0.0299974	1
IPF1	M01233	0.0300756	1
PPARalpha:RXRalpha	M00242	0.0301845	1
PR	M00957	0.0302435	1
REX1	M01696	0.0303792	1
HOXD12	M01380	0.0304326	1
HSF2	M01244	0.0304357	1
Ypr196w	M01950	0.0305976	1
GR	M00192	0.0307809	1
USF	M00217	0.0310684	1
(Prop-1)2	M01294	0.0311538	1
Barhl-1	M01332	0.0314331	1
AGL3	M00392	0.0319311	1
AP-3	M00690	0.0321682	1
RFX1	M01641	0.0322987	1
STB5	M01620	0.0324128	1
LF-A1	M00646	0.0331356	1
EBF1	MA0154.1	0.0331656	1
IRXB3	M01377	0.0343284	1
RGT1	M01176	0.0343668	1
/GR09/Phd1	PBM0078	0.0345091	1
Gsc	M01428	0.0346906	1
/GD09/Nsy-7_RC	PBM0003	0.0349727	1
GLI3	M01657	0.0350082	1
BR-C	M00093	0.0358292	1
/Cell09/HLH-11	PBM0167	0.0358877	1
Hand1::Tcfe2a	MA0092.1	0.0364068	1
AP-2beta	M01858	0.0364464	1
ZNF515	M01231	0.0365275	1
Pdr1	M01519	0.0365816	1
SWI5	M01625	0.036654	1
p53	M01655	0.0367046	1
UPC2	M01612	0.0369813	1
MET31	M01962	0.0371437	1
GBF	M00633	0.0377734	1
/GR09/Usv1	PBM0059	0.0382001	1
HOXA13	M01292	0.0383806	1
Nkx6-3	M01470	0.0384051	1
DBP	M01872	0.0386018	1
FXR/RXR-alpha	M00631	0.0387183	1
PTF1-beta	M00657	0.0387586	1
C/EBPalpha	M01866	0.0390177	1
YAF1	M01914	0.0393834	1
/Cell09/HLH-15_RC	PBM0193	0.0394176	1
NF-AT2	M01749	0.039877	1
Cup9	M01549	0.0400729	1
Hmx3	M00433	0.0400863	1
CLOCK:BMAL	M01116	0.0403517	1
Rpn4	M01559	0.0403665	1
REX1	M01695	0.0405271	1
C/EBP	M00201	0.0406543	1
AP-2alphaA	M01047	0.0407276	1
dTCF	M00362	0.0407388	1
NAC6	M01701	0.0408526	1
CBF1	M01779	0.0408549	1
SOK2	M01621	0.0410505	1
Isl2	M01328	0.0420652	1
GAL4	M00049	0.0421258	1
MCM1	M00125	0.0422984	1
ABF1	M01901	0.0428398	1
/Cell09/LIN-32_RC	PBM0160	0.042929	1
RAV1	M00344	0.0431351	1
GLI2	M01703	0.0434958	1
LMAF	M01139	0.0436262	1
CDP	M00102	0.0436617	1
/Cell09/HLH-15	PBM0169	0.0439156	1
GCR2	M01669	0.0439191	1
YY1	M00069	0.0445053	1
AML2	M01759	0.0447036	1
TFE	M01029	0.0447936	1
PDF2	M01194	0.0448506	1
Barx1	M01340	0.0454137	1
GLI3	M01704	0.0459567	1
HOXD13	M01404	0.0473963	1
STAT1:STAT1	M01212	0.047443	1
/GR09/Stb3	PBM0030	0.0475085	1
GATA-6	M00462	0.0477355	1
SRF	M00186	0.0478836	1
STAT3	M00497	0.0480851	1
bZIP911	M00358	0.0481391	1
ZABC1	M01306	0.0494442	1
POU5F1	M01307	0.0495158	1
HNF4	M00764	0.0498171	1
lhx6.1	M01422	0.0502642	1
BEN	M01240	0.0502699	1
Mat1-Mc	M00275	0.0503347	1
HOXA7	M01336	0.0503926	1
BAS1	M01711	0.0508418	1
Sp3	M00665	0.0516244	1
SRF	M01257	0.0517209	1
GAT1	M01910	0.0518758	1
AMS	M01799	0.0522139	1
Cdx-2	M00729	0.052299	1
Zic3	M00450	0.0527661	1
CEBPA	MA0102.2	0.0532768	1
SRF	M00922	0.0537464	1
YAP5	M01680	0.0543036	1
Abd-B	M00090	0.0544429	1
CCAAT	M00200	0.0545658	1
PPARG::RXRA	MA0065.2	0.0548361	1
Nkx2-5	M00240	0.0548736	1
SED	M01128	0.0550323	1
RNF96	M01199	0.0563744	1
Usv1	M01540	0.0566872	1
/GR09/Mbp1	PBM0023	0.0579097	1
TCP20	M01849	0.0579618	1
c-Myb	M00004	0.0581465	1
FOXF2	MA0030.1	0.0586246	1
Cdx-2	M01659	0.0587268	1
En1	MA0027.1	0.0588115	1
Gat4	M01578	0.0590062	1
Nr2e3	MA0164.1	0.0590639	1
SPT2	M01670	0.0593547	1
HOXC13	M01317	0.0597964	1
2014-10-01	M00161	0.059923	1
CBNAC	M01188	0.0600903	1
CNOT3	M01253	0.0606989	1
Obox6	M01445	0.0607298	1
MEF-2	M00941	0.0614025	1
AP	M01095	0.0614214	1
Mbp1	M01550	0.0615216	1
Tst-1	M00133	0.0615419	1
Tll	M00679	0.0620094	1
LXRalpha:RXRalpha	M00647	0.062149	1
YY2	M01694	0.0622859	1
MECP2	M01298	0.0625835	1
DAL82	M01608	0.0627452	1
Alx-4	M01417	0.0629231	1
LAC9	M00207	0.0630126	1
FAC1	M00456	0.063639	1
2014-10-01	M00195	0.0639029	1
TBF1	M01785	0.0640848	1
HLF	MA0043.1	0.064304	1
Tra-1	M01048	0.0646195	1
CG1	M00440	0.0652289	1
MAC1	M01715	0.0655729	1
Six-6	M01398	0.0657011	1
Dof	M01136	0.0661101	1
Lhx3	M01471	0.0662128	1
MATa1	M01679	0.0664407	1
PIF3	M00435	0.0670931	1
bZIP910	M00356	0.0671515	1
Dax1	M01248	0.0680474	1
Ncx	M00484	0.0688232	1
Elf-1	M00110	0.0689565	1
AGL1	M01059	0.0692449	1
GCM	M00634	0.0697617	1
AP-4	M00175	0.0701393	1
HNF3beta	M00131	0.0708731	1
CDP	M00106	0.0718922	1
Evx-1	M01475	0.0722282	1
ERR1	M01841	0.072806	1
MET31	M01688	0.0728666	1
HOXC4	M01369	0.0729894	1
NFAT3	M01734	0.0730548	1
RXR	M01152	0.073592	1
TGA2	M01812	0.0741361	1
TBX15	M01264	0.0741432	1
MAFB	M01227	0.0745205	1
CIZ	M00734	0.0745545	1
STAT1	M00496	0.0747181	1
Helios	M01004	0.0749135	1
Yml081w	M01905	0.0749153	1
Dlx7	M01486	0.0751498	1
Crx	M01436	0.0753651	1
CAD	M01097	0.0754038	1
DBP	M00624	0.0756638	1
/Cell09/HLH-2_CND-1	PBM0143	0.0764627	1
/GR09/Pbf1	PBM0090	0.0766977	1
c-Ets-1	M00743	0.0771882	1
NURR1	M01269	0.0773181	1
HSF2	M00147	0.078768	1
HSF1	M01023	0.07877	1
Yaf1	M01529	0.0792631	1
c-Myb	M00183	0.0797334	1
CRZ1	M01646	0.0798229	1
NKX6.1	M01489	0.0801112	1
Ypr015c	M01508	0.0805799	1
XBP-1	M00251	0.0815874	1
YY1	M00059	0.0817169	1
HOXB4	M01424	0.0822163	1
/Cell09/HLH-8_RC	PBM0146	0.0828881	1
Evi-1	M00080	0.0833455	1
PRD	M01091	0.0840581	1
Zic2	M00449	0.0847475	1
/NBT06/Rap1	PBM0201	0.0859383	1
/GR09/Ypr015c	PBM0071	0.0860565	1
GZF1	M01069	0.0863378	1
Pax-5	M00143	0.0866807	1
Dof2	M00353	0.0872799	1
IRF-4	M01883	0.0875547	1
DOT6	M01922	0.0880052	1
IRF-8	M01665	0.0881965	1
Pax-3	M00360	0.0884984	1
Dobox4	M01359	0.0885577	1
S8	M00099	0.0887747	1
Sn	M00044	0.0892064	1
2014-10-04	M01124	0.0899171	1
Ikaros	M01169	0.0900836	1
P53	M01651	0.0902963	1
PHO2	M01897	0.0904395	1
HOXD3	M01338	0.0904724	1
FOXO3	M00477	0.0905745	1
GLI1	M01702	0.0906279	1
MIG1	M01732	0.0911769	1
ERR3	M02000	0.0916262	1
SREBP-1	M00749	0.0918152	1
HNF4	M01031	0.0918946	1
HNF1	M00790	0.0920075	1
Barx-2	M01431	0.0920577	1
HNF4A	MA0114.1	0.0924348	1
Nanog	M01247	0.0924374	1
HDG7	M01191	0.0931246	1
Bel-1	M00312	0.0933504	1
TRAB1	M00507	0.093849	1
Nkx3-2	M01482	0.0956408	1
HOXA6	M01392	0.0969508	1
REI1	M01624	0.0972514	1
HOXA13	M01297	0.0973213	1
FKLF	M01837	0.097738	1
Zec	M01081	0.0978023	1
HSF	M00165	0.0979139	1
STRE	M00154	0.0985384	1
HOXA13	M01430	0.0995029	1
ATF2	M00040	0.0995659	1
MIG2	M01707	0.0996308	1
/Cell09/HLH-2_HLH-19	PBM0165	0.0999968	1
IRF-3	M01279	0.100409	1
TBX5	M01020	0.10108	1
Mycn	MA0104.2	0.101643	1
DREF	M00488	0.102444	1
MEF2A	MA0052.1	0.103046	1
six4	M01374	0.103846	1
RORA_1	MA0071.1	0.105018	1
STE11	M01005	0.105094	1
CUP2	M01998	0.105552	1
HSF	M00641	0.105671	1
Brn-3c	M01408	0.105951	1
VBP	M00228	0.107063	1
/Cell09/HLH-2_HLH-19_RC	PBM0180	0.108066	1
PPARA	M01282	0.108302	1
PCF2	M00948	0.108793	1
HB9	M01349	0.109167	1
/Cell09/HLH-26	PBM0173	0.110422	1
DMRT5	M01150	0.110523	1
E2L1	M01840	0.111398	1
HOXC12	M01437	0.111424	1
AP4	M01860	0.11236	1
Zic1	M00448	0.113078	1
Homez	M01429	0.113268	1
BYN	M01086	0.114272	1
PITX1	M01826	0.114544	1
FOXO1	M01968	0.114664	1
RAP1	M00213	0.11671	1
TOS8	M01645	0.117156	1
GR	M00205	0.118081	1
INO2:INO4	M01807	0.118175	1
FOXO3A	M01137	0.119821	1
2014-10-01	M00930	0.119866	1
/GR09/Tea1	PBM0069	0.12153	1
Kid3	M01160	0.122224	1
ERalpha	M01801	0.122287	1
AhR:Arnt	M00235	0.122449	1
GZF3	M01902	0.123551	1
Octamer	M01477	0.124173	1
CRX	M01712	0.12457	1
Nkx5-2	M01315	0.124786	1
CBNAC	M01189	0.124846	1
PMX2A	M01444	0.127446	1
Smad3	M01888	0.127767	1
TEIL	M00502	0.128289	1
HES1	M02011	0.128766	1
SOX	M01286	0.129648	1
/Cell09/HLH-8	PBM0152	0.13005	1
PITX3	M01735	0.130144	1
MEIS1A:HOXA9	M00420	0.130271	1
E2	M00107	0.130499	1
GATA-1	M00128	0.131143	1
YOX1	M01930	0.131177	1
HIC1	M01073	0.131395	1
KNI	M01099	0.13157	1
OSBZ8	M00654	0.131702	1
Fkh1	M01507	0.1319	1
PPARG	M01270	0.131928	1
TBP	M00980	0.132059	1
MZF1	M01733	0.132245	1
Clox	M00103	0.13292	1
Nkx2-5	MA0063.1	0.133708	1
CBF	M01080	0.134893	1
Tra-1	M01049	0.136497	1
STAT1	M01260	0.136659	1
XBP1	M01970	0.137066	1
Pax-4	M00377	0.137213	1
/Cell09/HLH-26_RC	PBM0142	0.137216	1
TFIIA	M00707	0.137473	1
HB24	M01399	0.137495	1
mTERF	M01245	0.138346	1
/Cell09/HLH-2_LIN-32_RC	PBM0183	0.138728	1
RDS2	M01940	0.138978	1
Irx2	M01405	0.139061	1
GAL4	M00198	0.139172	1
GATA-1	M00346	0.139333	1
Irx5	M01472	0.140033	1
Crx	M00623	0.140269	1
MIG1	M00061	0.141136	1
TGIF1	M01346	0.141473	1
Gata1	MA0035.2	0.141579	1
Ar	MA0007.1	0.141639	1
/GR09/Yap1	PBM0029	0.141741	1
COMP1	M00057	0.142724	1
PR	M00954	0.142818	1
C/EBPalpha	M00116	0.142898	1
Cdx-1	M01373	0.143417	1
Srd1	M01552	0.14436	1
Mig2	M01575	0.144493	1
MEIS1B:HOXA9	M00421	0.144948	1
PPARalpha:RXRalpha	M00518	0.145223	1
AREB6	M00412	0.145709	1
Barhl2	M01446	0.145903	1
/Cell09/MXL-1_MDL-1	PBM0188	0.147148	1
HOXC9	M01416	0.147878	1
AGL9	M01582	0.148606	1
HMGIY	M01879	0.150027	1
APOLYA	M00310	0.150216	1
/GR09/Matalpha2	PBM0058	0.150331	1
TCP11	M01851	0.150553	1
/GR09/Oaf1	PBM0018	0.151048	1
/GR09/Yox1	PBM0038	0.151302	1
NFAT1	M01281	0.152623	1
Mafb	MA0117.1	0.154683	1
Nobox	MA0125.1	0.155818	1
PDR1	M01662	0.156092	1
CCA1	M01819	0.157353	1
/Cell09/HLH-2_CND-1_RC	PBM0189	0.157435	1
Myb	MA0100.1	0.157645	1
ZNF354C	MA0130.1	0.15959	1
/Cell09/HLH-2_LIN-32	PBM0159	0.161436	1
/Cell09/MXL-1_MDL-1_RC	PBM0178	0.161457	1
AGL2	M01061	0.161935	1
E2F-1	M00430	0.162426	1
AR	M00956	0.162608	1
HNF4	M01032	0.162855	1
OVO	M01101	0.163016	1
Lmo2	M00277	0.164249	1
ASH1	M01672	0.164318	1
E2F1	M01250	0.164481	1
TBP	M01524	0.164522	1
RAP1	M01637	0.165069	1
En	M00696	0.165312	1
/GR09/Yer130c	PBM0073	0.1654	1
TBF1	M01786	0.165976	1
RAP1	M01828	0.166679	1
Ypr196w	M01565	0.167474	1
TCF-4	M02033	0.167676	1
COUPTF	M01036	0.168464	1
Ynr063w	M01917	0.169068	1
STAT6	M00494	0.169298	1
AtMYB-77	M00968	0.169573	1
HMRA2	M01607	0.169603	1
/GR09/Nrg1	PBM0006	0.169617	1
MSN2	M01915	0.171002	1
MET32	M01935	0.171519	1
Rox1	M01923	0.17193	1
RME1	M01691	0.173671	1
E2F6	M01252	0.174188	1
Phd1	M01523	0.174283	1
GTF2IRD1-isoform2	M01229	0.174966	1
CDP	M00095	0.175276	1
Evx2	M01386	0.175983	1
C-MAF	M01228	0.176151	1
AG	M00151	0.176732	1
AG	M01063	0.176732	1
Nkx3-2	MA0122.1	0.176956	1
MOT3	M01717	0.17856	1
POU1F1	M00744	0.180079	1
CDC5	M00361	0.1807	1
SRY	M00160	0.182347	1
HAHB-4	M00820	0.183322	1
Su(H)	M00234	0.183343	1
Gbx1	M01371	0.183345	1
GT-1	M00635	0.183844	1
Pax4	MA0068.1	0.184655	1
HMX1	M01481	0.184965	1
LBP9	M01592	0.185077	1
Hoxd9	M01834	0.185166	1
FOXO1	M01969	0.185818	1
FOXL1	MA0033.1	0.186308	1
2014-10-01	M00135	0.18658	1
E47	M00071	0.186985	1
MOT3	M01676	0.187625	1
ABF1	M00401	0.187633	1
Lentiviral	M00318	0.188658	1
GCM	M00270	0.18878	1
Opaque-2	M00443	0.189716	1
OG-2	M01441	0.190109	1
MYB	M00773	0.19051	1
HMGIY	M01010	0.190801	1
Zeste	M00283	0.191927	1
TBX5	M01019	0.195557	1
TBF1	M01913	0.196092	1
HFH4	M00742	0.196469	1
FOXD3	M00130	0.196947	1
AtMYB-15	M00969	0.197088	1
FACB	M00389	0.197788	1
WRKY11	M01740	0.199016	1
RORBETA	M01722	0.200529	1
Tbf1	M01746	0.20057	1
SRF	M01007	0.200616	1
Rhox11	M01384	0.200923	1
TAF	M00703	0.202598	1
Pbx-1	M01017	0.20287	1
WRKY	M00681	0.202931	1
GATA-1	M00127	0.203049	1
/GR09/Ynr063w	PBM0083	0.204126	1
Yox1	M01526	0.204456	1
ARP-1	M00155	0.204521	1
E2A	M00973	0.2049	1
Pax-1	M00326	0.205252	1
XPF-1	M00684	0.205414	1
qa-1F	M00047	0.206296	1
GAT4	M01945	0.207616	1
RSRFC4	M00407	0.208451	1
NR3C1	MA0113.1	0.208519	1
Six-3	M01358	0.20875	1
IME1	M01684	0.208999	1
HOXA3	M00395	0.209687	1
YAP1	M01891	0.209791	1
MTF-1	M00650	0.211072	1
REB1	M01943	0.211542	1
PacC	M00247	0.211776	1
HNF3	M01012	0.212753	1
SF1	M00727	0.213691	1
TGIF	M00418	0.21431	1
HIF1A::ARNT	MA0259.1	0.215165	1
Osf2	M00731	0.215184	1
Nkx3-2	M01181	0.215228	1
Muscle	M00323	0.216696	1
HAC1	M00730	0.216698	1
Gfi-1	M00250	0.217459	1
/GR09/Rap1	PBM0019	0.220319	1
PBX1	MA0070.1	0.221566	1
Lmx-1	M01409	0.222004	1
HNF4	M00134	0.222279	1
RIM101	M01959	0.222514	1
STAT5A	M00460	0.22264	1
CIN5	M01640	0.223108	1
Pax-4	M01385	0.22481	1
FOXJ2	M00423	0.225051	1
SREBP	M00776	0.226019	1
SPF1	M00702	0.22737	1
Nkx3-1	M00451	0.228478	1
E12	M00693	0.228899	1
HOXD8	M01432	0.229132	1
MAFA	M01709	0.229617	1
MSN4	M01952	0.230364	1
2014-10-01	M00138	0.230449	1
AREB6	M00414	0.232298	1
/GR09/Fkh1	PBM0024	0.232522	1
XFD-1	M00267	0.234482	1
HNF1A	MA0046.1	0.235103	1
HMO1	M01791	0.235667	1
T	MA0009.1	0.236875	1
HEN1	M00058	0.237093	1
Dlx-2	M01468	0.237713	1
ATHB-9	M00417	0.239124	1
Nkx5-1	M01413	0.239367	1
ING4	M01743	0.239544	1
MEF-2D	M02026	0.2396	1
Bsx	M01442	0.239646	1
/GR09/Mig1	PBM0014	0.239835	1
VDR,	M00966	0.240893	1
FEV	MA0156.1	0.241885	1
/GR09/Fkh2	PBM0026	0.242502	1
Fkh2	M01533	0.243021	1
/GR09/Pbf2	PBM0091	0.243035	1
PBF	M01130	0.243559	1
USF	M00122	0.243676	1
/Cell09/HLH-3	PBM0150	0.243733	1
LIM1	M00506	0.24519	1
HNF-4alpha	M02016	0.245425	1
HMG	M00750	0.246089	1
CBF1	M01727	0.246506	1
Cphx	M01478	0.247323	1
/Cell09/HLH-3_RC	PBM0147	0.247339	1
Ubx	M00018	0.247996	1
TGA1a	M00937	0.249646	1
2014-10-01	M00136	0.249728	1
IRF-1	M00747	0.24983	1
Met32	M01556	0.249836	1
Tal1::Gata1	MA0140.1	0.252402	1
SOX	M01014	0.253316	1
v-Myb	M00227	0.254069	1
MSN2	M01885	0.254713	1
Freac-7	M00293	0.254813	1
ZAP1	M01675	0.255446	1
/Cell09/MXL-1_RC	PBM0153	0.255965	1
/GR09/Ume6	PBM0049	0.256294	1
FOXP3	M01599	0.257499	1
/GR09/Gzf3	PBM0092	0.258421	1
/Cell09/MXL-1	PBM0194	0.258454	1
/NBT06/Oct-1	PBM0202	0.258702	1
/GR09/Pho2	PBM0088	0.260046	1
AR	M00447	0.260053	1
hbp1	M01661	0.263277	1
EBNA1	M01745	0.264278	1
LH-2	M01325	0.265837	1
Zen	M00710	0.266647	1
GCNF	M00526	0.267871	1
/GR09/Srd1	PBM0011	0.26795	1
GAT3	M01921	0.268123	1
Usv1	M01918	0.26822	1
CdxA	M00101	0.269211	1
TTF1	M00432	0.269426	1
RGM1	M01627	0.269428	1
Ncx	M01420	0.27005	1
Sox2	MA0143.1	0.270838	1
Evi-1	M00082	0.275565	1
Tcfcp2l1	MA0145.1	0.277262	1
Pbx-1b	M00124	0.27823	1
T3R	M00963	0.279082	1
HOXB7	M01396	0.279341	1
HOXB6	M01460	0.28068	1
Otx1	M01366	0.281052	1
RUSH-1alpha	M01107	0.281364	1
Hltf	MA0109.1	0.281364	1
IPF1	M01013	0.281959	1
PBF1	M01542	0.2827	1
UME6	M01503	0.283984	1
Tal-1beta:E47	M00065	0.284093	1
HNF4alpha1	M00411	0.28578	1
c-Myb	M01821	0.288253	1
/NBT06/Ceh-22	PBM0204	0.288713	1
FOXI1	MA0042.1	0.289035	1
Muscle	M00321	0.289066	1
AREB6	M00415	0.290583	1
Sfl1	M01566	0.294011	1
IFH1	M01789	0.294036	1
Nkx2-5	M00241	0.2952	1
MZF1	M00083	0.295701	1
Opaque-2	M00374	0.297501	1
Pou5f1	MA0142.1	0.29776	1
HNF4	M01033	0.297897	1
YAP1	M01726	0.297975	1
NKX3-1	MA0124.1	0.300484	1
Obox5	M01480	0.300539	1
Hmbox1	M01456	0.300852	1
Stat3	MA0144.1	0.30198	1
P	M00226	0.302034	1
SMAD3	M00701	0.302216	1
YAP3	M01628	0.304305	1
HoxA2	M01402	0.304859	1
HNF4alpha	M00638	0.306216	1
Pax	M00808	0.307211	1
/Cell09/REF-1	PBM0181	0.30747	1
NMYC	M01808	0.308022	1
/GR09/Gat4	PBM0048	0.308255	1
Gat1	M01570	0.3096	1
HOXA7	M01108	0.310968	1
TTF-1	M02034	0.312565	1
Lhx3	MA0135.1	0.312712	1
HNF3A	M01261	0.313098	1
ARR1	M01686	0.313738	1
MEF-2C	M02025	0.314108	1
R	M00273	0.31437	1
DEC	M00997	0.314487	1
IPF1	M01235	0.315023	1
CAT8	M00732	0.31605	1
MEF-2	M00233	0.317723	1
HOXA7	M01394	0.318382	1
AG	M01133	0.318523	1
PHD1	M01941	0.319883	1
HLF	M00260	0.320138	1
Retroviral	M00212	0.320971	1
ASR-1	M01161	0.322051	1
Pitx3	M01343	0.322976	1
EWSR1-FLI1	MA0149.1	0.323148	1
p53	M00034	0.323223	1
Ovo	M00461	0.323688	1
MYB.Ph3	M00219	0.323816	1
MRG2	M01395	0.324283	1
HNF1	M01011	0.324753	1
2014-10-06	M01316	0.325441	1
CF1	M00111	0.327025	1
SUM1	M01907	0.327493	1
PHO2	M01506	0.330935	1
FOX	M00809	0.331007	1
HOXA5	MA0158.1	0.331188	1
NHLH1	MA0048.1	0.331781	1
MEF-2	M00406	0.331787	1
GATA-2	M00348	0.33209	1
Grainyhead/Elf-1/NTF-1	M00951	0.332286	1
PBF	M01829	0.332936	1
TEF-1	M01817	0.333085	1
Xvent-1	M00445	0.335004	1
ER	M00959	0.335333	1
GIS1	M01626	0.335627	1
RAV1	M00343	0.336571	1
/GR09/Cup9	PBM0005	0.336998	1
Lmo2	M00278	0.337033	1
Pbx1	M01357	0.337924	1
SOX10	M01131	0.338602	1
RAP1	M01780	0.339054	1
STAT4	M01666	0.339786	1
IPF1	M01255	0.342339	1
p53	M00761	0.343695	1
DEAF	M01238	0.343735	1
ABF1	M00400	0.34519	1
/GR09/Mcm1	PBM0028	0.346166	1
E2F	M00024	0.349311	1
Nkx6-1	M00424	0.351808	1
E47	M00002	0.352192	1
MyoD	M00929	0.354012	1
/Cell09/REF-1_RC	PBM0198	0.354328	1
XFD-3	M00269	0.355463	1
E2F1	M01251	0.357298	1
HSF	M00028	0.358234	1
LEF1	M01022	0.359019	1
MADS-A	M00408	0.359158	1
Pax6	MA0069.1	0.359856	1
HoxB5	M01319	0.360416	1
FOXC1	MA0032.1	0.360759	1
Pax-5	M00144	0.360888	1
/GR09/Ndt80	PBM0067	0.36161	1
Skn-1	M00230	0.361966	1
RIN	M01892	0.36234	1
GR	M00955	0.363211	1
AP-2alpha	M00469	0.365492	1
SOX9	MA0077.1	0.365914	1
TBX18	M01262	0.367525	1
HTF	M00538	0.368879	1
FOXO4	M00472	0.368964	1
2014-10-01	M01354	0.370399	1
EAR2	M01728	0.370522	1
TEF-1	M00704	0.371246	1
Skn-1	M00229	0.372262	1
/PNAS08/PFF0200c	PBM0206	0.372316	1
Ixr1	M01683	0.373533	1
unc-86	M00689	0.374105	1
HNF4,	M00967	0.374507	1
AP-2rep	M00468	0.376404	1
RAP1	M01573	0.376419	1
ARG	M01687	0.376448	1
/CR09/Sox4_RC	PBM0001	0.376862	1
/CR09/Sox4	PBM0002	0.376862	1
ML1	M01193	0.377454	1
SMAD1	M01590	0.377635	1
v-Myb	M00003	0.378523	1
Cdx	M00991	0.379435	1
GATA-2	M00349	0.379769	1
ipf1	M01438	0.380761	1
STATx	M00223	0.381124	1
GATA-3	M00350	0.381229	1
GEN_INI	M00313	0.385516	1
STE11	M00274	0.386237	1
HSF	M00029	0.38736	1
/GR09/Sfl1	PBM0036	0.38774	1
GATA-1	M00075	0.38803	1
Dof3	M00354	0.388471	1
bZIP911	M00359	0.388538	1
/GR09/Mig2	PBM0015	0.390254	1
En-1	M01365	0.39251	1
hoxa9	M01351	0.393434	1
MZF1_5-13	MA0057.1	0.393563	1
/Cell09/HLH-2_RC	PBM0184	0.393665	1
HOXA10	M01464	0.394456	1
SRD1	M01964	0.397369	1
Dlx-1	M01439	0.399766	1
Olf-1	M00261	0.400481	1
AP-2	M00800	0.40112	1
YRM1	M01501	0.401553	1
YY1	MA0095.1	0.401926	1
FOXO4	M00476	0.402722	1
/GR09/Met32	PBM0062	0.404789	1
FOXM1	M00630	0.406162	1
HNF3	M00791	0.406894	1
SGF-3	M00662	0.407426	1
BR-C	M00091	0.407473	1
SRY	MA0084.1	0.407493	1
2014-10-04	M01125	0.407527	1
HIF1	M00466	0.408421	1
HTF4	M02018	0.40865	1
XFD-2	M00268	0.410441	1
Poly	M00317	0.411118	1
(SATB1)2	M01232	0.416663	1
/GR09/Tec1	PBM0075	0.416888	1
GKLF	M01835	0.417108	1
MADS-B	M00404	0.417453	1
GATA-3	M00351	0.417577	1
Esrrb	MA0141.1	0.418125	1
/GR09/Tbf1	PBM0032	0.41874	1
AR	M00953	0.419671	1
SMAD	M00974	0.42062	1
ABF1	M00399	0.420765	1
Hdx	M01333	0.420782	1
HOXD1	M01448	0.420897	1
CF1A	M01098	0.421166	1
E2A	M00804	0.421837	1
p63	M01656	0.424008	1
E2	M00928	0.424055	1
Ik-3	M00088	0.424611	1
HSF	M00164	0.426329	1
ZEB1	MA0103.1	0.426371	1
TEC1	M01534	0.426541	1
GATA-4	M00632	0.428183	1
Foxq1	MA0040.1	0.428224	1
Evi-1	M00078	0.428682	1
OTX2	M01719	0.429032	1
RSRFC4	M00026	0.429656	1
Opaque-2	M00010	0.430318	1
ABF1	M00015	0.430706	1
Eve	M00629	0.430918	1
/GR09/Stp4	PBM0042	0.434756	1
AG	M00950	0.437683	1
/GR09/Mga1	PBM0070	0.438394	1
Shox2	M01415	0.438997	1
Gln3	M01569	0.440726	1
/Cell09/HLH-1	PBM0148	0.445499	1
STAT3:STAT3	M01220	0.446375	1
MYB	M00913	0.44674	1
TCF	M01092	0.446954	1
MRF-2	M00454	0.447667	1
Six-1	M01313	0.449065	1
Dde	M00304	0.449082	1
MEF-3	M00319	0.450073	1
Ik-1	M00086	0.452373	1
Cgd2	M01805	0.457455	1
/PNAS08/Cgd2_3490	PBM0207	0.457455	1
YPR022C	M01647	0.460411	1
Six-2	M01433	0.460529	1
IPF1	M01234	0.460669	1
NF-AT2	M01718	0.461087	1
Smp1	M01553	0.461478	1
NFIC	MA0161.1	0.461663	1
GLI	M01037	0.461883	1
FOXP3	M00992	0.463786	1
Prrx2	MA0075.1	0.464095	1
Nanog	M01123	0.464257	1
TR4	M01776	0.464458	1
MYBAS1	M00798	0.46719	1
Rtg3	M01580	0.469069	1
/Cell09/HLH-25_RC	PBM0171	0.469167	1
/Cell09/HLH-25	PBM0172	0.469167	1
ABF1	M00197	0.469956	1
Ynr063w	M01492	0.471415	1
AP-4	M00927	0.471463	1
Duxl	M01390	0.471641	1
PMX2B	M01356	0.472278	1
AR	M00481	0.472378	1
GAMYB	M01135	0.47313	1
Tax/CREB	M00115	0.473459	1
Freac-3	M00291	0.476855	1
Pax-4	M00373	0.477165	1
Tal-1alpha:E47	M00066	0.477415	1
Nkx3A	M01383	0.477575	1
FKH2	M01906	0.477979	1
AP-2alphaA	M01045	0.478577	1
Meis2	M01488	0.483925	1
TWI	M01103	0.484149	1
Yml081w	M01536	0.485218	1
HOXB8	M01451	0.48624	1
Gfi1	M01067	0.486422	1
Mox1	M01443	0.486911	1
POU6F1	M01479	0.487487	1
CDP	M01342	0.488156	1
Pax-8	M00328	0.489555	1
CI	M01706	0.490008	1
ARF	M00438	0.490221	1
Otx2	M01387	0.492222	1
Nkx2-3	M01457	0.492238	1
SREBP-1	M00221	0.492409	1
POU3F2	M00463	0.493322	1
Nkx2-6	M01322	0.494896	1
AbaA	M00027	0.496985	1
IRF-7	M01884	0.497309	1
SOX9	M00410	0.498411	1
HIC1	M01072	0.499144	1
ATHB-5	M00503	0.499221	1
Antp	M01084	0.50034	1
Vax-1	M01397	0.502363	1
KR	M01089	0.504448	1
/Cell09/HLH-1_RC	PBM0138	0.506251	1
HMO1	M01792	0.506776	1
RORalpha2	M00157	0.507515	1
OTP	M01323	0.508194	1
Bcd	M00140	0.50832	1
SREBP2	M01177	0.508471	1
ZBRK1	M01105	0.509343	1
Gbx2	M01382	0.509733	1
Lyf-1	M00141	0.509974	1
Pax5	MA0014.1	0.510454	1
MIG1	M01572	0.51048	1
AP-2gamma	M00470	0.510772	1
AR	M01201	0.51213	1
CBF	M01079	0.512861	1
NIT2	M00142	0.512935	1
/GR09/Rtg3	PBM0077	0.513905	1
ACE2	M01616	0.514438	1
STAT5A	M00499	0.51595	1
HFH3	M00289	0.517973	1
D-Type	M00334	0.518804	1
ROX1	M00728	0.518807	1
En-1	M00396	0.51924	1
/Cell09/HLH-2	PBM0149	0.520129	1
/PNAS08/PF14_0633	PBM0205	0.520971	1
DMRT7	M01151	0.522174	1
LEF-1	M02019	0.522643	1
AP-2	M00915	0.524685	1
MAC1	M01824	0.527944	1
Lbx2	M01401	0.528003	1
IPF1	M00436	0.528244	1
Hb	M00022	0.52921	1
BRCA1:USF2	M01082	0.530595	1
VDR	M00444	0.530682	1
GATA-1	M00347	0.531167	1
HOXA1	M01487	0.532324	1
FOXO3	MA0157.1	0.533346	1
myogenin	M00712	0.534246	1
Stp4	M01562	0.535459	1
Ndt80	M01515	0.535895	1
DEAF1	M01088	0.537259	1
/EMBO10/Spdef_RC	PBM0099	0.540636	1
TBX5	M01044	0.541381	1
SIG1	M01631	0.541899	1
C/EBP	M00190	0.54214	1
C1	M00439	0.543368	1
STE12	M01926	0.546733	1
Arnt::Ahr	MA0006.1	0.546793	1
RFX	M00975	0.546835	1
Gfi1b	M01058	0.547111	1
MIG1	M01708	0.547375	1
/GR09/Gat1	PBM0045	0.548127	1
HMGIY	M01653	0.54884	1
FOXD1	MA0031.1	0.549638	1
Pax-2	M00486	0.550405	1
AZF1	M01618	0.550604	1
HNF6	M00639	0.551616	1
PSX1	M01435	0.55393	1
MZF1	M00084	0.554361	1
BCL6	M01171	0.556009	1
Rhox11	M01347	0.556256	1
Meis1	M01419	0.55807	1
HSF	M00170	0.561625	1
CART1	M01453	0.564815	1
CHOP:C/EBPalpha	M00249	0.566044	1
MCM1+SFF	M01051	0.566186	1
ZAP1	M00754	0.568877	1
Gzf3	M01498	0.569217	1
TAL1	M00993	0.570629	1
POU3F2	M00464	0.570752	1
Esx1	M01474	0.573202	1
Mga1	M01547	0.573428	1
ESE1	M01214	0.574082	1
HMGIY	M01800	0.574561	1
Msx-3	M01341	0.574822	1
TATA	M00216	0.575103	1
Dof1	M00352	0.578274	1
Dobox5	M01463	0.578379	1
ZID	M00085	0.578858	1
2014-10-02	M01761	0.58153	1
HFH1	M00129	0.581577	1
Spz1	MA0111.1	0.582441	1
CUP9	M01953	0.583808	1
LTF	M01692	0.583915	1
/GR09/Pho4	PBM0089	0.58638	1
Lhx3a	M00510	0.586429	1
HOXA5	M01452	0.587392	1
HNF-3beta	M02014	0.588078	1
HEN1	M00068	0.588538	1
ANT	M00501	0.588999	1
RREB-1	M00257	0.590349	1
HSF	M00167	0.590378	1
NF-AT	M00302	0.590406	1
Lhx4	M01421	0.594845	1
Gat3	M01502	0.594948	1
ApiAP2	M01802	0.596121	1
ApiAP2	M01803	0.596121	1
ApiAP2	M01804	0.596121	1
HOXC6	M01406	0.598045	1
INO4	M01689	0.602758	1
K-2b	M01348	0.604147	1
Nkx6-2	M00489	0.604314	1
OTX	M01117	0.60463	1
Helios	M01003	0.606396	1
SOX17	M01016	0.608502	1
HOXC-8	M01321	0.608587	1
EmBP-1b	M00788	0.608649	1
Dbx-2	M01360	0.608911	1
Obox3	M01466	0.610475	1
RP58	M00532	0.614209	1
PREP1	M01459	0.614675	1
EBF	M00977	0.615269	1
Nkx1-1	M01334	0.616191	1
NF-AT4	M01886	0.616262	1
Foxa2	MA0047.2	0.616792	1
ALX-3	M01355	0.617463	1
Cdc5	M00478	0.618545	1
/GR09/Rph1	PBM0025	0.623247	1
AR	M00962	0.624285	1
Yer130c	M01568	0.624628	1
CPRF-1	M00368	0.625486	1
Zfx	MA0146.1	0.625567	1
Evi-1	M00079	0.626602	1
REB1	M00307	0.626627	1
MAL63	M01731	0.628998	1
HNF-1alpha	M01379	0.631126	1
NKX6.1	M01469	0.631622	1
Dfd	M00019	0.632994	1
RORalpha1	M00156	0.634203	1
PARP	M02027	0.63474	1
DMRT1	M01146	0.635257	1
PKNOX2	M01411	0.635876	1
SMAD4	M00733	0.637158	1
MAX	M01830	0.637338	1
PEND	M01015	0.638716	1
SOX9	M01284	0.63928	1
GSH2	M01326	0.639994	1
ECM23	M01614	0.640833	1
NFIL3	MA0025.1	0.641087	1
Octamer	M01324	0.64191	1
PXR,	M00964	0.641977	1
Brachyury	M00150	0.642016	1
Nkx2-9	M01352	0.642461	1
Pitx1	M01484	0.643233	1
GR	M00921	0.643467	1
HSF	M00163	0.643503	1
NUR77	M01217	0.64379	1
GEN_INI	M00314	0.645123	1
IRX4	M01410	0.645173	1
En-2	M01455	0.645381	1
IPF1	M01236	0.647161	1
HSF1	M01844	0.648473	1
AGL15	M01581	0.649209	1
Msx-1	M01412	0.649742	1
DOT6	M01537	0.651419	1
deltaEF1	M00073	0.652071	1
YHP1	M01668	0.656136	1
Sox17	MA0078.1	0.656972	1
LXRbeta:RXRalpha	M02021	0.65705	1
CDP	M00105	0.661297	1
/GR09/Aft1	PBM0061	0.66225	1
c-Myc	M01154	0.663096	1
VDR	M00961	0.664891	1
GATA-3	M00077	0.666953	1
MET4	M01678	0.667767	1
ZNF333	M01230	0.667801	1
CF2-II	M00012	0.668157	1
SF1	M01132	0.669894	1
HCM1	M01630	0.672733	1
/GR09/Gat3	PBM0047	0.673357	1
HDG9	M01192	0.674743	1
HNF1	M00132	0.676781	1
TP53	MA0106.1	0.679501	1
Myc	MA0147.1	0.683527	1
TBX15	M01263	0.68365	1
isx	M01331	0.684228	1
Pax-6	M00097	0.684526	1
RCS1	M00753	0.686173	1
Evi-1	M00081	0.686815	1
C/EBPgamma	M01869	0.686907	1
Alx-4	M00619	0.687061	1
/GR09/Smp1	PBM0040	0.688732	1
HFH8	M00294	0.688806	1
Lhx9	M01367	0.689151	1
STAT4	M00498	0.691787	1
BCL6	M01185	0.691954	1
GATA-2	M00076	0.694288	1
Obox1	M01450	0.695137	1
Msx-1	M00394	0.695959	1
p53	M00272	0.696246	1
Freac-4	M00292	0.696544	1
TFAP2A	MA0003.1	0.69655	1
AIRE	M00999	0.696596	1
NKX25	M01414	0.69725	1
YY1	M01894	0.702398	1
EMX2	M01461	0.702925	1
ROM	M00700	0.703514	1
MYC::MAX	MA0059.1	0.706606	1
FOXO1	M01216	0.71166	1
GL1	M01583	0.712085	1
p300	M00033	0.712675	1
TEC1	M01810	0.713472	1
AML2	M01814	0.71653	1
GATA-5	M02006	0.71697	1
CHX10	M00437	0.719464	1
rax	M01389	0.721285	1
SMAD	M00792	0.721333	1
Msx-2	M01393	0.721615	1
ARID3A	MA0151.1	0.72251	1
ABF1	M01289	0.723679	1
2014-10-02	M01368	0.724438	1
MCM1	M01831	0.726723	1
HP1	M00725	0.727921	1
BR-C	M00094	0.72923	1
CP2/LBP-1c/LSF	M00947	0.729861	1
SRY	M00148	0.73066	1
HOXB3	M01330	0.732245	1
ZAP1	M01895	0.732414	1
GLN3	M01939	0.73476	1
Adf-1	M00923	0.735011	1
KLF15	M01714	0.735908	1
SOX10	MA0442.1	0.736654	1
PPARgamma:RXRalpha,	M00515	0.736744	1
RPH1	M01919	0.737752	1
Brn-4	M01473	0.738802	1
HOXA5	M00023	0.739257	1
Nkx2-4	M01350	0.739282	1
Rph1	M01574	0.739794	1
Pdx1	MA0132.1	0.742009	1
C/EBPbeta	M00109	0.742686	1
LEF1	M00805	0.743578	1
S8	M01376	0.744481	1
SREBP1	M01173	0.74456	1
FOXO1	M00474	0.745298	1
TGIF2	M01407	0.752923	1
Foxd3	MA0041.1	0.756359	1
AGL1	M01060	0.75702	1
AP-4	M00005	0.759801	1
ERR2	M01589	0.759841	1
BAS1	M01554	0.759971	1
SREBP	M01168	0.761505	1
SPT23	M01682	0.761788	1
FOXO1	M00473	0.763305	1
Nkx2-5	M01043	0.766761	1
/GR09/Yml081w	PBM0033	0.769253	1
POU6F1	M00465	0.770778	1
Ydr520c	M01521	0.770865	1
cap	M00253	0.771208	1
Cart-1	M00416	0.771981	1
TEF	M00672	0.772833	1
MCM1	M01788	0.773401	1
HSF1	M01937	0.774423	1
Gfi1	M02010	0.776489	1
PLZF	M01075	0.777803	1
Six-6	M01345	0.778136	1
HSF	M00168	0.779303	1
TBX22	M01195	0.781628	1
OG-2	M01162	0.783267	1
Tal-1beta:ITF-2	M00070	0.784294	1
Sry-beta	M00666	0.78433	1
Pbx1	M02028	0.785431	1
NF-AT2	M01748	0.786303	1
HNF-1A	M02013	0.787456	1
HOXC5	M01454	0.78907	1
Irx-3	M01318	0.789146	1
HES1	M01009	0.792636	1
ROX1	M01737	0.792968	1
/Cell09/HLH-2_HLH-4	PBM0157	0.796893	1
/Cell09/HLH-2_HLH-4_RC	PBM0185	0.796893	1
Knox3	M00819	0.797075	1
GATA3	MA0037.1	0.798854	1
NAC69-1	M01055	0.802171	1
Ttk	M00009	0.806268	1
Muscle	M00324	0.806381	1
ABF1	M01265	0.808548	1
Tbf1	M01493	0.812148	1
GLI1	M01042	0.812813	1
Barbie	M00238	0.814363	1
GLI3	M01596	0.815266	1
HOXA3	M01337	0.816484	1
ACAAT	M00309	0.818662	1
SOX4	M01308	0.818685	1
GATA-X	M00203	0.82085	1
RXR::RAR_DR5	MA0159.1	0.82255	1
KAISO	M01119	0.826406	1
GATA2	MA0036.1	0.82645	1
BPC1	M01126	0.826481	1
GCNF	M02009	0.826694	1
Nkx2-1	M01312	0.827599	1
Evi1	MA0029.1	0.828988	1
/GR09/Yap6	PBM0031	0.831634	1
Yap6	M01548	0.832094	1
/Cell09/HLH-2_HLH-10_RC	PBM0145	0.832218	1
/Cell09/HLH-2_HLH-10	PBM0162	0.832218	1
PR,	M00960	0.833006	1
TATA	M00252	0.833673	1
TBP	MA0108.2	0.833673	1
yAP-1	M01496	0.834475	1
/GR09/Sut2	PBM0066	0.836112	1
Brn-2	M00145	0.836224	1
/GR09/Yrm1	PBM0076	0.83993	1
/GR09/Mig3	PBM0016	0.842294	1
TEF	M01305	0.84372	1
TEAD1	MA0090.1	0.84372	1
TTF-1	M00794	0.844095	1
Ddit3::Cebpa	MA0019.1	0.847565	1
aMEF-2	M00403	0.851102	1
CdxA	M00100	0.852056	1
ID1	M01021	0.852722	1
DRI1	M01654	0.852884	1
ESR1	MA0112.2	0.853141	1
Hand1:E47	M00222	0.85404	1
FZF1	M01904	0.854504	1
PHO4	M01564	0.85733	1
COE1	M01871	0.859059	1
Pax-9	M00329	0.859857	1
Pax-4	M00378	0.863328	1
Cdx-2	M01449	0.864731	1
RREB1	MA0073.1	0.864826	1
/Cell09/HLH-27	PBM0174	0.868006	1
/Cell09/HLH-27_RC	PBM0186	0.868006	1
Abd-A	M01083	0.868382	1
GATA-1	M00126	0.868406	1
PBF	M00355	0.871068	1
TRF1	M01237	0.871413	1
traM	M01309	0.874315	1
FOXJ2	M00422	0.875988	1
Zeste	M00934	0.876609	1
GATA	M00789	0.879525	1
/Cell09/HLH-2_HLH-8	PBM0158	0.881319	1
/GR09/Bas1	PBM0046	0.881852	1
Lhx8	M01440	0.884867	1
NFATC2	MA0152.1	0.885316	1
TFII-I	M00706	0.888845	1
pax6	M01391	0.889393	1
Evi-1	M02002	0.890929	1
DAF-16	M00475	0.890933	1
Smad4	M01889	0.891489	1
FPM315	M01587	0.892987	1
Sox5	MA0087.1	0.893838	1
CAC-binding	M00720	0.894436	1
/Cell09/HLH-2_HLH-8_RC	PBM0139	0.894618	1
Sut2	M01567	0.895253	1
FACB	M00388	0.896895	1
STAT	M00777	0.897948	1
Pbx	M00998	0.898307	1
TCF-3	M01594	0.899342	1
LUN-1	M00480	0.899638	1
HNF1B	MA0153.1	0.899983	1
Pax-6	M00979	0.902046	1
Arx	M01423	0.9057	1
CDP	M01344	0.907262	1
MEIS1	M00419	0.907357	1
GAGA	M00723	0.907391	1
Pax-8	M00717	0.907451	1
Vsx1	M01335	0.908569	1
AFP1	M00616	0.90898	1
RORalpha	M01138	0.912837	1
DMRT2	M01147	0.916266	1
HNF-1beta	M01425	0.917111	1
Vax-2	M01327	0.917212	1
MATalpha2	M00031	0.920624	1
MYB.Ph3	M00218	0.921103	1
ISL1	M01127	0.921129	1
TCF11	M00285	0.922781	1
MEF-2	M00405	0.923388	1
HSF	M00166	0.926035	1
mtTFA	M00487	0.926062	1
Spz1	M00446	0.926515	1
PITX2	M01447	0.92843	1
/GR09/Ydr520c	PBM0072	0.928844	1
AGP1	M01006	0.930044	1
/Cell09/HLH-2_HLH-14	PBM0163	0.930352	1
repressor	M00014	0.93123	1
CRP	M00202	0.934038	1
GAF	M01209	0.934402	1
AP-2	M01859	0.934816	1
dlx5	M01388	0.935204	1
MATH1	M01716	0.935392	1
SZF1-1	M01109	0.935855	1
C/EBPgamma	M00622	0.937414	1
Mig3	M01494	0.937684	1
TCF-4	M00671	0.93858	1
/GR09/Gln3	PBM0008	0.939232	1
MCM1	M01510	0.940357	1
LEF1,	M00978	0.942333	1
STRE	M00308	0.945222	1
Uncx-4.1	M01458	0.947982	1
E2	M00181	0.949204	1
/Cell09/HLH-2_HLH-15_RC	PBM0144	0.949949	1
MTF1	M01242	0.950739	1
FACB	M00390	0.950762	1
Nkx1-2	M01427	0.952731	1
ABF2	M01853	0.953988	1
SIRT6	M01797	0.957086	1
TAL1::TCF3	MA0091.1	0.957409	1
ZBED6	M01598	0.958084	1
MATa1	M00030	0.959777	1
POU6F1	M01462	0.963664	1
ESR2	MA0258.1	0.964302	1
MYB80	M01052	0.964943	1
HNF1	M00206	0.96525	1
MyoD	M00001	0.966116	1
C/EBP	M00159	0.96787	1
TBR2	M01774	0.97037	1
Obox5	M01381	0.971359	1
STAT5A	M00493	0.972416	1
E4BP4	M00045	0.972834	1
Kr	M00021	0.972876	1
TCP11	M01850	0.97566	1
NeuroD	M01288	0.977569	1
LRH1	M01142	0.977662	1
/Cell09/HLH-29	PBM0176	0.978516	1
Zfp423	MA0116.1	0.979683	1
Aft1	M01522	0.980988	1
Pit-1	M01465	0.98268	1
/Cell09/HLH-2_HLH-14_RC	PBM0182	0.983814	1
/Cell09/HLH-2_HLH-15	PBM0164	0.984245	1
AGL15	M00949	0.984849	1
AMT1	M01710	0.987012	1
lhx6.1	M01314	0.987459	1
/Cell09/HLH-29_RC	PBM0191	0.988689	1
RORA_2	MA0072.1	0.991007	1
PCF5	M00952	0.991791	1
MATalpha2	M01505	0.996937	1
CART1	M01362	0.99795	1
MET28	M01674	0.998147	1
/GR09/Spt15	PBM0080	0.998202	1

## Sheet: Diff binding (genome-wide)
Supplementary Table 5-2: List of active transcription factors ranked by statistical evidence of differential binding genome-wide, after MTB infection.
Motif name	Motif ID	Z-score (NI)	Z-score (MTB)	ZMTB-ZNI	P-value	Bonferroni P-value
Sp1	M00931	79.6436	62.0145	-17.6291	7.3e-83	1.9272e-80
Sp1	M00196	61.1386	42.202	-18.9366	2.48e-75	6.5472e-73
Sp1	M00932	59.2077	40.0635	-19.1442	6.41e-75	1.69224e-72
SP4	M01273	31.0309	14.7015	-16.3294	9.15e-43	2.4156e-40
MIG1	M01961	37.708	26.0206	-11.6874	4.88e-42	1.28832e-39
Sp1	M00933	19.7138	5.27639	-14.4374	2.63e-31	6.9432e-29
GCbox	M00255	50.1593	42.7942	-7.36514	1.34e-30	3.5376e-28
CTCF	M01259	128.65	122.012	-6.63831	1.21e-26	3.1944e-24
SP2	M01783	38.5193	28.6732	-9.84614	1.49e-24	3.9336e-22
Klf4	MA0039.2	30.0609	20.2236	-9.83725	2.94e-24	7.7616e-22
NF-kappaB	M00774	18.7984	37.2895	18.4911	2.37e-23	6.2568e-21
CTCF	M01200	112.277	105.572	-6.70526	4.18e-23	1.10352e-20
IRF	M00772	16.3477	33.7311	17.3833	2.66e-21	7.0224e-19
KROX	M00982	28.7423	20.3517	-8.39059	2.58e-17	6.8112e-15
CTCF	MA0139.1	114.603	108.695	-5.90772	6.99e-17	1.84536e-14
Pitx2	M00482	68.2189	65.7312	-2.4877	1.34e-16	3.5376e-14
NFKB1	MA0105.1	10.201	23.7514	13.5504	2.79e-15	7.3656e-13
UGA3	M01622	33.4786	26.6976	-6.78098	8.93e-15	2.35752e-12
ELF5	MA0136.1	14.759	27.8723	13.1133	1.05e-13	2.772e-11
SREBP-1	M00220	50.059	46.5231	-3.53597	1.22e-13	3.2208e-11
RELA	MA0107.1	11.3809	24.3299	12.949	2.71e-12	7.1544e-10
Zfp206	M01742	33.0911	26.3506	-6.74051	1.53e-11	4.0392e-09
NF-kappaB	M00054	20.0097	33.6673	13.6576	3.65e-11	9.636e-09
WT1	M02036	17.7157	10.3154	-7.40029	3.78e-11	9.9792e-09
NF-kappaB	M00208	18.6894	31.7867	13.0974	8.09e-11	2.13576e-08
NF-kappaB(p65)	M00052	11.33	23.3664	12.0365	1.13e-10	2.9832e-08
IRF2	MA0051.1	7.0566	17.8649	10.8083	1.25e-10	3.3e-08
SP1	MA0079.2	5.14091	-4.13765	-9.27856	1.26e-10	3.3264e-08
NF-kappaB	MA0061.1	18.9664	31.7687	12.8023	7.78e-10	2.05392e-07
IRF1	MA0050.1	12.5604	23.9905	11.4301	1.35e-09	3.564e-07
GKLF(KLF4)	M01588	3.22287	-6.03711	-9.25998	1.84e-09	4.8576e-07
NF-kappaB	M00194	14.8149	26.5254	11.7105	9.38e-09	2.47632e-06
GABPA	MA0062.2	14.0454	7.37464	-6.67079	1.01e-08	2.6664e-06
BRF-1	M01747	-26.231	-22.0998	4.13119	4.21e-08	1.11144e-05
NF-kappaB(p50)	M00051	14.4396	25.7839	11.3443	1.26e-07	3.3264e-05
Elf-1	M00746	36.5269	34.1037	-2.42324	1.67e-07	4.4088e-05
REL	MA0101.1	14.7805	24.9864	10.2059	4.63e-07	0.000122232
SQUA	M01164	1.56969	8.75865	7.18896	5.36e-07	0.000141504
c-Rel	M00053	14.796	24.878	10.082	8.36e-07	0.000220704
SPI-B	M01204	64.2162	66.0135	1.79725	1.22e-06	0.00032208
RelB:p52(NF-kappaB)	M01239	16.7022	27.2921	10.5899	1.44e-06	0.00038016
P50:P50	M01223	11.8822	21.2507	9.36842	2.08e-06	0.00054912
IRF-2	M00063	-1.29296	6.00718	7.30014	2.27e-06	0.00059928
FRA1	M01267	10.4386	19.5267	9.08809	2.78e-06	0.00073392
AP-1	M00926	42.2615	57.9132	15.6516	3.66e-06	0.00096624
P50:RELA-P65	M01224	11.6643	20.2718	8.60753	2.01e-05	0.0053064
SP1:SP3	M01219	9.78611	4.62302	-5.16309	2.07e-05	0.0054648
/Cell09/HLH-30_RC	PBM0141	8.00066	16.3151	8.31444	2.14e-05	0.0056496
/Cell09/HLH-30	PBM0177	8.00066	16.3151	8.31444	2.14e-05	0.0056496
/Cell09/HLH-4_RC	PBM0190	25.4337	23.6523	-1.78143	2.95e-05	0.007788
/EMBO10/Elf5	PBM0125	35.9651	35.359	-0.60613	4.57e-05	0.0120648
CREB	M00039	17.3874	16.1784	-1.20897	5.06e-05	0.0133584
IRF-1	M00062	3.87252	10.7727	6.90021	6.58e-05	0.0173712
CREB	M00917	14.8897	11.7974	-3.09226	0.000101971	0.0269203
CREB	M00916	13.0631	9.62553	-3.43762	0.000116515	0.03076
ATF3	M00513	14.6945	11.92	-2.77444	0.000309326	0.0816621
HAC1	M01610	3.65378	10.259	6.60518	0.000327822	0.086545
/EMBO10/Elf5_RC	PBM0106	35.5584	35.9699	0.411529	0.000520588	0.137435
YY1	M01035	10.0009	6.61903	-3.38189	0.000705974	0.186377
/GR09/Tye7	PBM0063	-8.13677	-4.25784	3.87893	0.000804357	0.21235
AP-1	M00199	4.80103	10.9512	6.15012	0.000957	0.252648
GABP	M01258	14.4177	11.5065	-2.91119	0.000976013	0.257667
NFE2L2	MA0150.1	12.4954	18.3469	5.85153	0.00185066	0.488574
CREB	M00178	15.4385	14.1131	-1.32545	0.00298	0.78672
ZF5	M00716	-1.382	2.33078	3.71278	0.00301727	0.79656
Tye7	M01558	-6.5953	-3.18645	3.40885	0.00395012	1
E74A	M00016	17.6126	16.7133	-0.899372	0.00446	1
ATF	M00017	8.27581	5.49606	-2.77976	0.0047	1
MEF-2	M00231	-3.17417	-0.599384	2.57479	0.00507	1
/EMBO10/Sfpi1_RC	PBM0111	27.8076	28.6393	0.831672	0.0062298	1
SPI1(PU1)	M01203	65.0363	66.9175	1.88113	0.00843525	1
CREM	M01820	10.7823	8.92522	-1.85711	0.0122586	1
/EMBO10/Sfpi1	PBM0136	30.4109	31.7716	1.36069	0.0144648	1
MAF	M00648	13.0451	11.6437	-1.40146	0.015895	1
TEL1(ETV6)	M01993	-11.0138	-9.80606	1.20778	0.0162066	1
GCN4	M00204	8.59188	13.8898	5.29791	0.0169	1
NF-E2	M00037	14.6539	21.2917	6.63781	0.0171	1
TFEB	M01768	11.1581	17.0207	5.86264	0.0174516	1
Whn	M00332	1.45994	-1.7757	-3.23564	0.0185	1
Tel-2	M00678	-6.30844	-4.01602	2.29242	0.019405	1
ELF5	M01197	2.61742	6.94102	4.3236	0.0196264	1
GCN4	M01713	5.32106	9.982	4.66094	0.0197944	1
/EMBO10/Spic_RC	PBM0133	46.8482	47.4743	0.626172	0.0198698	1
STF1	M01187	5.70307	3.60709	-2.09598	0.0204916	1
CBF1	M01911	-1.76161	1.14266	2.90426	0.0211549	1
NRSE	M00325	14.7965	13.1374	-1.65913	0.0215	1
STF1	M01186	7.61577	5.87075	-1.74503	0.0216956	1
/EMBO10/Gabpa_RC	PBM0109	2.53655	-0.406677	-2.94322	0.0282721	1
c-Ets-1p54	M01078	-0.0832321	3.33923	3.42246	0.0314419	1
Elk-1	M00025	5.06182	2.5951	-2.46672	0.0316	1
ATF1	M00691	8.30043	6.98558	-1.31486	0.031782	1
/EMBO10/Gabpa	PBM0101	2.1402	-0.820707	-2.96091	0.0347136	1
c-Ets-2	M00340	14.5301	15.537	1.00694	0.0364	1
SRF	M00152	1.61634	4.69926	3.08293	0.0372	1
Bach1	M00495	16.2198	22.2657	6.04589	0.0376369	1
ELF5	M01980	6.19234	4.47855	-1.71379	0.0390189	1
ER81(ETV1)	M01987	9.06346	7.97984	-1.08362	0.0397365	1
ATF	M00338	11.5133	10.6554	-0.857865	0.0411	1
/EMBO10/Elf3	PBM0123	10.027	8.63912	-1.38786	0.0413214	1
/EMBO10/Ehf	PBM0117	4.23028	1.9	-2.33028	0.0421832	1
TCF11:MafG	M00284	6.09171	9.88574	3.79403	0.0439	1
CPRF-3	M00944	15.4896	16.0954	0.605825	0.0452686	1
ABI4	M00958	8.75652	6.79123	-1.96529	0.0486762	1
ICSBP	M00699	19.093	27.2708	8.17775	0.0492694	1
TAF-1	M00369	3.37375	1.21044	-2.16331	0.0546	1
CREB,ATF	M00981	11.3728	11.2777	-0.0951499	0.0548647	1
NRSF	M01028	14.018	13.204	-0.813949	0.0577141	1
CHA4	M01916	-8.81745	-7.41892	1.39853	0.0577552	1
ATF-2	M01862	7.7752	6.48855	-1.28665	0.0584083	1
Spic	M02042	13.3257	12.023	-1.30272	0.0603897	1
/EMBO10/Erg_RC	PBM0096	5.76852	3.77701	-1.99151	0.0619373	1
/EMBO10/Elk3_RC	PBM0128	1.61028	-0.695509	-2.30579	0.0702996	1
ERG	M01985	-2.74765	-6.14648	-3.39884	0.0722424	1
CREB	M00177	8.20903	7.30739	-0.901636	0.0728	1
/EMBO10/Elk3	PBM0130	3.13274	1.27897	-1.85377	0.0750155	1
GABP-beta	M01876	18.326	18.568	0.242007	0.0802872	1
/EMBO10/Elk1_RC	PBM0119	3.18981	1.14289	-2.04692	0.0821404	1
/GR09/Hal9	PBM0007	1.43536	4.14944	2.71408	0.082569	1
Egr1	MA0162.1	15.8985	16.5178	0.619274	0.0834609	1
/EMBO10/Etv5	PBM0104	2.82036	0.720294	-2.10006	0.0882184	1
/GR09/Ykl222c	PBM0022	-1.62026	0.624899	2.24515	0.089129	1
/EMBO10/Elf4	PBM0124	12.1101	11.7017	-0.408414	0.0892806	1
znf143	MA0088.1	1.92139	4.84704	2.92565	0.0921304	1
ISGF-3	M00258	20.2872	27.2979	7.01066	0.0969	1
/EMBO10/Elk1	PBM0129	3.44903	1.56234	-1.88669	0.101972	1
NF-1	M00806	4.44621	2.70054	-1.74567	0.106117	1
E2F-1	M00431	5.45604	4.12443	-1.33161	0.109478	1
Ets	M00771	19.75	21.6709	1.92096	0.120106	1
GCN4	M00038	10.1738	14.5846	4.41083	0.121	1
Stra13	M00985	8.00509	12.0926	4.08748	0.123061	1
Egr-3	M00245	8.62745	7.87871	-0.748738	0.13	1
FLI1	M01208	9.89208	9.80662	-0.0854607	0.132628	1
/EMBO10/Ets1_RC	PBM0112	6.15743	5.00759	-1.14984	0.138759	1
Elk-1	M00007	2.69688	6.13162	3.43474	0.144	1
/EMBO10/Etv4	PBM0103	5.5758	4.66469	-0.911109	0.151546	1
NRSF	M00256	16.8547	16.2916	-0.563084	0.152	1
PDR1	M01633	-6.46317	-5.01014	1.45303	0.157259	1
RFX1	M00281	10.2598	9.86788	-0.391929	0.171	1
/EMBO10/Spic	PBM0134	47.3258	49.6655	2.33971	0.171655	1
alpha-CP1	M00687	11.7147	12.36	0.645273	0.172614	1
ARR10	M01050	2.00934	0.280411	-1.72893	0.175088	1
ATF2	M00179	10.0496	10.1742	0.124609	0.176	1
/GR09/Stp2	PBM0041	8.91983	8.22335	-0.696481	0.178845	1
PEA3(ETV4)	M01991	8.02873	7.18286	-0.845866	0.182281	1
/EMBO10/Erg	PBM0121	7.07372	6.72133	-0.352395	0.182846	1
/EMBO10/Gm5454	PBM0126	4.33384	2.93402	-1.39983	0.185596	1
EHF	M01974	3.95226	2.63829	-1.31398	0.188249	1
/EMBO10/Ets1	PBM0098	5.43586	4.25903	-1.17683	0.189883	1
/EMBO10/Etv4_RC	PBM0132	4.8527	4.20629	-0.646418	0.192781	1
ELF4	M01979	4.90714	3.79498	-1.11216	0.193516	1
Staf	M00262	8.97413	9.04916	0.0750373	0.197	1
E2F-1	M00938	0.110179	-1.50913	-1.61931	0.214619	1
/EMBO10/Gm5454_RC	PBM0135	4.00254	2.61977	-1.38277	0.214811	1
CPRF-2	M00945	11.9267	16.6221	4.69537	0.224879	1
E2F	M00425	3.46724	2.19329	-1.27394	0.232095	1
Stp2	M01560	9.80641	9.55548	-0.250932	0.232204	1
ELF1	M01975	8.03849	8.12996	0.0914748	0.236484	1
/NBT06/Zif268	PBM0203	5.45616	4.7856	-0.670565	0.236951	1
/EMBO10/Etv5_RC	PBM0116	2.7852	1.22949	-1.55571	0.240467	1
CBF1	M00303	4.60604	7.19203	2.58599	0.243	1
Elk-1	M01165	9.498	9.37636	-0.121642	0.245272	1
NFYA	MA0060.1	25.0576	31.7182	6.66052	0.254105	1
/EMBO10/Etv1	PBM0100	5.12996	4.1978	-0.932158	0.258145	1
NGFI-C	M00244	0.855051	2.55774	1.70268	0.261	1
Yrr1	M01511	-2.26407	-0.907129	1.35694	0.264935	1
EGR1/Zif268	M01972	-0.904619	0.153275	1.05789	0.275325	1
/EMBO10/Etv3_RC	PBM0108	3.04395	2.22936	-0.814596	0.283962	1
ERG	M01752	-0.605397	-2.77442	-2.16902	0.288869	1
CPRF-2	M00371	14.2079	16.2401	2.03228	0.297	1
Arnt	M00539	7.29307	10.8479	3.5548	0.299185	1
TGA1b	M00375	4.50479	6.8346	2.32981	0.324	1
Pet-1(FEV)	M02037	6.26258	5.79899	-0.463584	0.32547	1
Fli-1	M02038	4.06319	3.19114	-0.872052	0.346348	1
c-Ets-1(p54)	M00032	1.12759	-0.32289	-1.45048	0.347	1
Rsc3	M01551	2.10161	3.62261	1.521	0.348106	1
c-ets-1(ets1)	M01986	4.46658	3.88435	-0.582229	0.371986	1
/EMBO10/Elf2	PBM0122	9.36489	10.4051	1.04017	0.377022	1
Rb:E2F-1:DP-1	M00740	1.98918	0.967662	-1.02151	0.397005	1
/EMBO10/Ehf_RC	PBM0120	3.12702	2.28361	-0.843413	0.401173	1
/GR09/Rgt1	PBM0012	2.75082	1.78497	-0.96585	0.406203	1
Egr-2	M00246	4.88712	6.89762	2.0105	0.41	1
ATF-3	M01863	2.4665	1.85752	-0.60898	0.41323	1
/GR09/Rsc3	PBM0052	1.97771	3.30149	1.32378	0.424581	1
Erm(ETV5)	M01992	6.18189	6.02101	-0.16088	0.434577	1
REST	M01256	13.8178	14.3307	0.512891	0.437424	1
/GR09/Yll054c	PBM0068	-2.16914	-1.48022	0.688917	0.440366	1
Yll054c	M01509	-2.14549	-1.47127	0.674219	0.447191	1
/EMBO10/Gm4881_RC	PBM0097	3.23743	2.65453	-0.582903	0.450117	1
LEU3	M00306	2.88725	1.93564	-0.951613	0.455	1
CREB	M00113	3.56421	5.29935	1.73515	0.474	1
ETV3	M01990	4.34605	3.96586	-0.38019	0.478737	1
YRM1	M01932	-1.90475	-3.81972	-1.91497	0.483743	1
LYS14	M01946	-1.75616	-2.84274	-1.08658	0.488066	1
GCN4	M01555	8.37389	8.84318	0.469288	0.504449	1
CEP3	M01544	0.672923	1.67961	1.00669	0.513067	1
E2F-1	M00940	1.02884	0.182987	-0.845853	0.51845	1
/EMBO10/Gm4881	PBM0127	2.51982	1.99602	-0.523805	0.520386	1
ATF-1	M01861	0.563296	-0.23003	-0.793326	0.52743	1
ELK4	MA0076.1	5.59511	5.70864	0.11353	0.52991	1
NF-Y	M00287	24.7712	32.0062	7.235	0.548	1
/EMBO10/Fli1	PBM0114	3.79186	4.23735	0.44549	0.554053	1
Cha4	M01518	2.02219	3.28552	1.26333	0.5628	1
USF	M00187	3.25177	3.19131	-0.0604592	0.563	1
CEP3	M01852	1.26156	2.34	1.07844	0.564729	1
GABPalpha	M02039	1.13635	1.96259	0.826233	0.569804	1
/GR09/Cha4	PBM0086	1.69519	2.8839	1.18871	0.574748	1
ELF3	M01977	2.74294	2.8057	0.0627676	0.587484	1
RSC30	M01899	0.012648	0.75994	0.747292	0.588641	1
/EMBO10/Elf2_RC	PBM0113	5.17202	5.20477	0.032743	0.597363	1
/EMBO10/Etv3	PBM0102	3.19729	3.10944	-0.0878417	0.604421	1
/GR09/Cep3	PBM0060	0.432236	1.23248	0.800243	0.606076	1
CBF1	M01794	6.11687	8.55339	2.43652	0.611364	1
AP-1	M00517	9.09748	10.241	1.14347	0.620804	1
REST	MA0138.2	18.9886	19.5316	0.543051	0.634835	1
MafK	M02022	14.2739	17.9924	3.71849	0.641276	1
MAF	M00983	11.487	14.6493	3.16232	0.649248	1
/EMBO10/Etv6_RC	PBM0094	-0.488218	-1.23836	-0.75014	0.654458	1
/EMBO10/Elk4_RC	PBM0115	1.91049	3.15183	1.24134	0.659802	1
HY5	M01584	4.50177	4.68377	0.181997	0.676351	1
ERF	M01984	4.14276	4.32941	0.186644	0.679323	1
PDR8	M01613	-4.11284	-4.35482	-0.241981	0.679742	1
SPI1(PU.1)	M02043	2.9457	3.78353	0.837832	0.689279	1
DEAF1	M01001	3.72632	3.8419	0.115576	0.690935	1
E2F	M00516	2.94667	4.20969	1.26301	0.695371	1
Ets2(c-ets-2)	M01989	6.74866	7.49954	0.750884	0.695909	1
NRF-2/GABP	M00108	0.00349282	0.472422	0.46893	0.703	1
Put3	M01525	0.804555	1.36774	0.563182	0.703975	1
Ykl222c	M01960	-0.292622	0.232904	0.525526	0.704902	1
MIZF	M01182	1.01956	0.619041	-0.400514	0.7058	1
ER71	M01988	1.24583	2.03809	0.792259	0.709428	1
TGA2	M01586	4.52207	6.26757	1.7455	0.712036	1
Nrf-2	M00821	13.1154	16.3616	3.24626	0.716115	1
ELK1	MA0028.1	0.455851	0.112489	-0.343362	0.718793	1
/GR09/Rds1	PBM0056	-0.131001	-0.653082	-0.522081	0.720685	1
RDS1	M01531	0.165314	-0.279094	-0.444408	0.721912	1
ELK-1	M01981	1.09104	1.59476	0.503725	0.733158	1
ELF2	M01976	1.83732	1.52722	-0.310099	0.740223	1
v-Jun	M00036	7.56728	8.89557	1.3283	0.742	1
/EMBO10/Etv1_RC	PBM0095	4.49786	4.59841	0.100548	0.746815	1
/EMBO10/Etv6	PBM0105	0.674045	2.15943	1.48538	0.75551	1
c-Ets-1	M00339	17.6295	20.6389	3.00943	0.769	1
AP-1	M00174	4.90523	5.18049	0.275257	0.771	1
SAP-1a	M01167	1.90427	1.67147	-0.232792	0.794732	1
Elk-1	M01163	7.45121	8.54563	1.09442	0.796105	1
RITA-1	M00660	-4.0659	-5.8987	-1.83281	0.809855	1
USF	M00121	6.55662	7.56932	1.0127	0.838	1
/EMBO10/Fli1_RC	PBM0107	1.74606	1.99364	0.247579	0.858069	1
Bach2	M00490	6.14053	7.30965	1.16911	0.870658	1
Net(Elk-3)	M01982	1.27511	1.59449	0.31938	0.873285	1
PDEF(SPDEF)	M02040	2.12662	2.17314	0.0465234	0.881185	1
UME6	M01898	1.52371	1.80794	0.284233	0.884873	1
TBS1	M01936	-3.28865	-3.29332	-0.00467264	0.888403	1
SAP1A(Elk4)	M01983	2.76038	3.33017	0.569794	0.894283	1
UAY	M00391	1.88335	2.15254	0.269181	0.906225	1
/GR09/Rsc30	PBM0053	2.20968	2.15434	-0.0553383	0.909837	1
/EMBO10/Elf4_RC	PBM0118	7.51537	9.07673	1.56136	0.915442	1
RSC30	M01520	2.25904	2.25793	-0.00110745	0.93754	1
Egr-1	M00243	10.1743	13.3103	3.13599	0.951	1
Rgt1	M01557	2.34984	2.4789	0.12906	0.955445	1
/GR09/Gcn4	PBM0074	7.76324	9.0579	1.29467	0.964017	1
/EMBO10/Elk4	PBM0131	2.89231	3.70002	0.807715	0.964593	1
GABP	M00341	11.8951	13.6988	1.80367	0.976	1
NRF-1	M00652	3.47201	3.82712	0.355114	0.983884	1
Spi-B	M02041	2.75672	2.85733	0.100607	0.998286	1

## Sheet: Diff binding (hypo-DMRs)
Supplementary Table 5-3: List of active transcription factors ranked by statistical evidence of differential binding at hypomethylated regions, after MTB infection.
Motif name	Motif ID	ZMTB-ZNI	P-value	FDRa
REL	MA0101.1	5.81254	6.15312e-09	1.56904e-06
c-Rel	M00053	5.29176	1.21144e-07	1.54458e-05
IRF	M00772	4.07144	4.67224e-05	0.0039714
AP-1	M00926	3.95382	7.6914e-05	0.00490326
RELA	MA0107.1	3.82867	0.000128836	0.00657063
NFKB1	MA0105.1	3.61509	0.000300248	0.0127606
NF-kappaB(p65)	M00052	3.04033	0.00236316	0.0840074
P50:RELA-P65	M01224	3.00733	0.00263553	0.0840074
NF-kappaB	M00774	2.89052	0.00384602	0.108971
NF-kappaB	M00208	2.73445	0.00624854	0.159338
NF-kappaB	M00194	2.68807	0.00718659	0.166598
P50:P50	M01223	2.63721	0.00835899	0.168727
SPI1	M01203	2.62749	0.00860178	0.168727
NF-kappaB	MA0061.1	2.56768	0.0102381	0.17167
RelB:p52	M01239	2.55717	0.0105528	0.17167
NF-kappaB	M00054	2.55003	0.0107715	0.17167
MIG1	M01961	1.23465	0.21696	1
c-Ets-1	M00339	1.12956	0.258662	1
NF-kappaB(p50)	M00051	1.10373	0.269709	1
/EMBO10/Spic_RC	PBM0133	1.07448	0.282607	1
/EMBO10/Spic	PBM0134	1.04551	0.295786	1
UGA3	M01622	-0.967692	0.333198	1
GC	M00255	-0.953988	0.340089	1
SPI-B	M01204	0.884166	0.376606	1
ISGF-3	M00258	0.853392	0.393442	1
Sp1	M00931	-0.755368	0.450028	1
SP1	MA0079.2	0.622224	0.533794	1
Sp1	M00196	-0.600718	0.548028	1
/Cell09/HLH-4_RC	PBM0190	0.545421	0.585464	1
KROX	M00982	-0.492201	0.622577	1
Ets	M00771	0.484623	0.627944	1
SP4	M01273	-0.4571	0.647599	1
Sp1	M00933	-0.431582	0.666045	1
/EMBO10/Elf5	PBM0125	-0.400103	0.689081	1
CPRF-2	M00371	-0.366507	0.713987	1
/EMBO10/Elf5_RC	PBM0106	-0.36381	0.716	1
MafK	M02022	0.341624	0.732634	1
/EMBO10/Sfpi1	PBM0136	-0.338581	0.734925	1
FLI1	M01208	-0.320502	0.748588	1
ELF5	MA0136.1	-0.318787	0.749888	1
/EMBO10/Ehf_RC	PBM0120	0.24158	0.809106	1
MAF	M00648	-0.231501	0.816926	1
GABP-beta	M01876	-0.23138	0.817019	1
c-Ets-2	M00340	-0.221514	0.824693	1
Elf-1	M00746	-0.213098	0.83125	1
IRF-2	M00063	0.20717	0.835877	1
HAC1	M01610	0.206103	0.836711	1
GKLF	M01588	-0.189891	0.849394	1
/EMBO10/Sfpi1_RC	PBM0111	-0.188535	0.850457	1
RITA-1	M00660	-0.183597	0.854329	1
ICSBP	M00699	-0.178553	0.858289	1
/GR09/Gcn4	PBM0074	-0.172106	0.863354	1
Sp1	M00932	-0.152889	0.878486	1
Pitx2	M00482	-0.143142	0.886178	1
CTCF	M01200	-0.140224	0.888483	1
/EMBO10/Ehf	PBM0117	0.0973418	0.922455	1
Egr1	MA0162.1	-0.0331207	0.973578	1
MEF-2	M00231	0.024299	0.980614	1
NF-E2	M00037	-0.022429	0.982106	1
Klf4	MA0039.2	0.020591	0.983572	1
IRF-1	M00062	0.0195645	0.984391	1
IRF1	MA0050.1	0.00862063	0.993122	1
Staf	M00262	-0.00734832	0.994137	1
GCN4	M01555	0.00526531	0.995799	1
BRF-1	M01747	-0.00314884	0.997488	1
GCN4	M00038	0.00235191	0.998124	1
/EMBO10/Elf3	PBM0123	0.00227362	0.998186	1
FRA1	M01267	-0.00211533	0.998312	1
/EMBO10/Elk3_RC	PBM0128	0.0016975	0.998646	1
/EMBO10/Erg_RC	PBM0096	0.000913029	0.999271	1
Nrf-2	M00821	0.000820176	0.999346	1
CEP3	M01852	0.000792462	0.999368	1
CTCF	M01259	0.000727726	0.999419	1
HY5	M01584	-0.000594811	0.999525	1
SP1:SP3	M01219	0.000355714	0.999716	1
NFE2L2	MA0150.1	0.000168702	0.999865	1
SQUA	M01164	7.96794e-05	0.999936	1
PDR1	M01633	4.35116e-05	0.999965	1
znf143	MA0088.1	-2.48794e-05	0.99998	1
CPRF-2	M00945	1.85208e-05	0.999985	1
TCF11:MafG	M00284	9.27447e-06	0.999993	1
MAF	M00983	7.67886e-06	0.999994	1
IRF2	MA0051.1	-4.7314e-06	0.999996	1
AP-1	M00199	-4.56883e-06	0.999996	1
Bach1	M00495	3.6707e-06	0.999997	1
ELF5	M01197	-3.07721e-06	0.999997	1
SREBP-1	M00220	-1.59196e-06	0.999999	1
Tye7	M01558	-3.62955e-07	1	1
/GR09/Tye7	PBM0063	-3.77146e-07	1	1
NF-1	M00806	2.33662e-07	1	1
SP2	M01783	-2.82353e-07	1	1
E74A	M00016	-7.45984e-08	1	1
AP-1	M00517	-1.24899e-07	1	1
GABPA	MA0062.2	-1.15375e-07	1	1
/EMBO10/Etv4_RC	PBM0132	-1.31533e-07	1	1
Elk-1	M00007	-4.4964e-15	1	1
ATF	M00017	5.55111e-17	1	1
Elk-1	M00025	9.04832e-15	1	1
c-Ets-1(p54)	M00032	-1.49186e-16	1	1
v-Jun	M00036	1.55431e-15	1	1
CREB	M00039	4.44089e-16	1	1
NRF-2/GABP	M00108	-2.53555e-10	1	1
CREB	M00113	7.42083e-16	1	1
USF	M00121	3.51386e-13	1	1
SRF	M00152	2.22045e-16	1	1
AP-1	M00174	2.2387e-08	1	1
CREB	M00177	-1.22124e-15	1	1
CREB	M00178	4.82947e-15	1	1
ATF2	M00179	-1.9984e-15	1	1
USF	M00187	-1.33227e-15	1	1
GCN4	M00204	4.51896e-10	1	1
Egr-1	M00243	-1.77636e-15	1	1
NGFI-C	M00244	8.32667e-16	1	1
Egr-3	M00245	9.7612e-17	1	1
Egr-2	M00246	4.44089e-16	1	1
NRSF	M00256	-5.55111e-17	1	1
RFX1	M00281	2.22045e-15	1	1
NF-Y	M00287	5.55111e-16	1	1
CBF1	M00303	-2.33147e-15	1	1
NRSE	M00325	-2.01617e-13	1	1
Whn	M00332	-8.32667e-16	1	1
ATF	M00338	4.44089e-16	1	1
GABP	M00341	9.71445e-16	1	1
TAF-1	M00369	9.99201e-16	1	1
TGA1b	M00375	1.86962e-13	1	1
UAY	M00391	6.66134e-16	1	1
E2F-1	M00431	-3.71925e-15	1	1
Bach2	M00490	4.20081e-12	1	1
ATF3	M00513	-6.10623e-16	1	1
E2F	M00516	1.90672e-15	1	1
Arnt	M00539	-6.57807e-15	1	1
NRF-1	M00652	-3.05311e-15	1	1
Tel-2	M00678	-3.88578e-15	1	1
alpha-CP1	M00687	-2.85071e-11	1	1
ATF1	M00691	-3.88578e-16	1	1
ZF5	M00716	-1.96363e-08	1	1
Rb:E2F-1:DP-1	M00740	1.59624e-16	1	1
CREB	M00916	-2.16494e-15	1	1
CREB	M00917	1.77636e-15	1	1
E2F-1	M00938	-2.22045e-15	1	1
E2F-1	M00940	-1.81076e-14	1	1
CPRF-3	M00944	-5.09734e-08	1	1
ABI4	M00958	4.44089e-16	1	1
CREB,	M00981	-9.4369e-16	1	1
Stra13	M00985	2.22045e-16	1	1
DEAF1	M01001	-5.55111e-16	1	1
NRSF	M01028	-5.55111e-16	1	1
YY1	M01035	1.11022e-16	1	1
ARR10	M01050	-1.9984e-15	1	1
c-Ets-1	M01078	-6.24501e-15	1	1
Elk-1	M01163	1.24345e-14	1	1
Elk-1	M01165	1.44329e-15	1	1
SAP-1a	M01167	2.498e-16	1	1
STF1	M01186	-2.17049e-14	1	1
STF1	M01187	-1.9762e-14	1	1
REST	M01256	-3.55271e-15	1	1
GABP	M01258	-9.32587e-15	1	1
Cha4	M01518	0	1	1
RSC30	M01520	1.66534e-16	1	1
Put3	M01525	1.83273e-15	1	1
RDS1	M01531	-1.68858e-17	1	1
CEP3	M01544	-3.78975e-15	1	1
Rsc3	M01551	-1.5099e-14	1	1
Rgt1	M01557	0	1	1
Stp2	M01560	7.43849e-15	1	1
TGA2	M01586	-9.4369e-16	1	1
PDR8	M01613	4.25485e-09	1	1
GCN4	M01713	4.44089e-16	1	1
Zfp206	M01742	-4.44089e-16	1	1
ERG	M01752	-1.11022e-14	1	1
TFEB	M01768	2.22045e-16	1	1
CBF1	M01794	-2.22045e-15	1	1
CREM	M01820	-8.32667e-16	1	1
ATF-1	M01861	7.4496e-14	1	1
ATF-2	M01862	4.44089e-15	1	1
ATF-3	M01863	-3.12864e-15	1	1
RSC30	M01899	1.11022e-16	1	1
CBF1	M01911	-1.76526e-13	1	1
CHA4	M01916	-9.10383e-15	1	1
YRM1	M01932	-3.11695e-14	1	1
LYS14	M01946	-1.33227e-15	1	1
Ykl222c	M01960	-2.22045e-16	1	1
EGR1/	M01972	-2.89381e-09	1	1
EHF	M01974	-8.88178e-16	1	1
ELF1	M01975	2.0834e-13	1	1
ELF2	M01976	-4.15796e-14	1	1
ELF3	M01977	5.66214e-15	1	1
ELF4	M01979	1.11022e-15	1	1
ELF5	M01980	1.22124e-15	1	1
ELK-1	M01981	-7.16094e-15	1	1
Net	M01982	-1.22124e-15	1	1
SAP1A	M01983	-3.38785e-13	1	1
ERF	M01984	-1.22319e-16	1	1
ERG	M01985	7.77156e-16	1	1
c-ets-1	M01986	-2.77556e-16	1	1
ER81	M01987	-3.33067e-16	1	1
ER71	M01988	-4.3715e-15	1	1
Ets2	M01989	-3.33067e-16	1	1
ETV3	M01990	-3.10807e-13	1	1
PEA3	M01991	2.40612e-15	1	1
Erm	M01992	-6.40599e-14	1	1
TEL1	M01993	-2.77556e-17	1	1
WT1	M02036	-1.37959e-12	1	1
Pet-1	M02037	-3.33067e-15	1	1
Fli-1	M02038	-1.36946e-13	1	1
GABPalpha	M02039	3.55271e-15	1	1
PDEF	M02040	1.48755e-16	1	1
Spi-B	M02041	2.00284e-13	1	1
Spic	M02042	-3.44368e-13	1	1
SPI1	M02043	5.32907e-15	1	1
ELK1	MA0028.1	1.93818e-14	1	1
NFYA	MA0060.1	-5.76542e-10	1	1
ELK4	MA0076.1	1.11022e-16	1	1
REST	MA0138.2	-1.11022e-16	1	1
CTCF	MA0139.1	-1.18651e-10	1	1
/GR09/Rgt1	PBM0012	-1.44329e-15	1	1
/GR09/Ykl222c	PBM0022	-2.35052e-20	1	1
/GR09/Stp2	PBM0041	5.21805e-15	1	1
/GR09/Rsc3	PBM0052	1.86799e-15	1	1
/GR09/Rsc30	PBM0053	1.66534e-16	1	1
/GR09/Rds1	PBM0056	3.0218e-16	1	1
/GR09/Cep3	PBM0060	8.00494e-18	1	1
/GR09/Cha4	PBM0086	2.22045e-15	1	1
/EMBO10/Etv6_RC	PBM0094	1.11022e-16	1	1
/EMBO10/Etv1_RC	PBM0095	-1.7971e-08	1	1
/EMBO10/Gm4881_RC	PBM0097	6.10623e-16	1	1
/EMBO10/Ets1	PBM0098	4.16334e-16	1	1
/EMBO10/Etv1	PBM0100	-4.36081e-08	1	1
/EMBO10/Gabpa	PBM0101	-2.59237e-14	1	1
/EMBO10/Etv3	PBM0102	-5.55111e-17	1	1
/EMBO10/Etv4	PBM0103	-4.2466e-15	1	1
/EMBO10/Etv5	PBM0104	-1.11022e-15	1	1
/EMBO10/Etv6	PBM0105	-4.996e-16	1	1
/EMBO10/Fli1_RC	PBM0107	-3.40838e-14	1	1
/EMBO10/Etv3_RC	PBM0108	1.33227e-15	1	1
/EMBO10/Gabpa_RC	PBM0109	-2.53131e-14	1	1
/EMBO10/Ets1_RC	PBM0112	1.05471e-15	1	1
/EMBO10/Elf2_RC	PBM0113	2.77556e-16	1	1
/EMBO10/Fli1	PBM0114	-2.22045e-16	1	1
/EMBO10/Elk4_RC	PBM0115	-1.11022e-16	1	1
/EMBO10/Etv5_RC	PBM0116	3.81084e-14	1	1
/EMBO10/Elf4_RC	PBM0118	5.55111e-17	1	1
/EMBO10/Elk1_RC	PBM0119	3.33067e-16	1	1
/EMBO10/Erg	PBM0121	-3.28757e-11	1	1
/EMBO10/Elf2	PBM0122	5.55111e-17	1	1
/EMBO10/Elf4	PBM0124	-5.55111e-16	1	1
/EMBO10/Gm5454	PBM0126	-1.21071e-09	1	1
/EMBO10/Gm4881	PBM0127	-3.88578e-16	1	1
/EMBO10/Elk1	PBM0129	0	1	1
/EMBO10/Elk3	PBM0130	-1.66534e-16	1	1
/EMBO10/Elk4	PBM0131	-1.11022e-16	1	1
/EMBO10/Gm5454_RC	PBM0135	-1.66534e-16	1	1
/Cell09/HLH-30_RC	PBM0141	1.66534e-16	1	1
/Cell09/HLH-30	PBM0177	1.66534e-16	1	1
/NBT06/Zif268	PBM0203	-1.13798e-15	1	1
a False Discovery Rate.

## Sheet: TF enrichment (hypo-DMRs)
Supplementary Table 5-4: List of active transcription factors ranked by statistical evidence of enrichment of binding events at hypomethylated regions, after MTB infection.
Motif name	Motif ID	Enrichment (log2)	P-value	Bonferroni P-value
NF-kappaB(p65)	M00052	3.18639	1.90164e-67	4.73507e-65
NF-kappaB	M00774	2.9926	1.71632e-65	4.27364e-63
NF-kappaB	M00054	3.14655	8.15414e-62	2.03038e-59
NF-kappaB	MA0061.1	3.16655	3.00098e-61	7.47244e-59
RelB:p52	M01239	3.1094	2.91955e-60	7.26967e-58
RELA	MA0107.1	3.19665	4.03545e-57	1.00483e-54
c-Rel	M00053	3.30138	1.41512e-52	3.52365e-50
REL	MA0101.1	3.3288	9.17781e-52	2.28528e-49
NF-kappaB	M00208	3.29196	7.07393e-47	1.76141e-44
P50:RELA-P65	M01224	3.09048	6.32674e-45	1.57536e-42
NF-kappaB	M00194	3.1645	6.45087e-45	1.60627e-42
P50:P50	M01223	2.99323	3.04502e-43	7.58209e-41
AP-1	M00926	2.25	2.65655e-38	6.61482e-36
NFKB1	MA0105.1	2.92482	2.02991e-35	5.05448e-33
IRF	M00772	1.71901	8.23839e-34	2.05136e-31
NF-kappaB(p50)	M00051	2.93153	2.7088e-33	6.74492e-31
PEA3	M00655	1.73137	1.01383e-31	2.52444e-29
GCN4	M01555	2.41426	9.46299e-22	2.35629e-19
ISGF-3	M00258	1.90756	3.87273e-21	9.64309e-19
/GR09/Gcn4	PBM0074	2.37325	1.60483e-20	3.99602e-18
CPRF-2	M00945	1.95084	2.05709e-19	5.12216e-17
ICSBP	M00699	1.99852	2.37643e-19	5.91731e-17
SPI-B	M01204	2.02322	2.78916e-19	6.945e-17
FRA1	M01267	2.31927	6.46677e-18	1.61023e-15
CPRF-2	M00371	1.88896	2.79363e-17	6.95613e-15
IRF1	MA0050.1	1.81106	1.81146e-16	4.51054e-14
/EMBO10/Spic	PBM0134	1.9	6.42734e-16	1.60041e-13
/EMBO10/Sfpi1	PBM0136	1.89454	1.79816e-15	4.47743e-13
/EMBO10/Spic_RC	PBM0133	1.82922	1.85806e-14	4.62657e-12
ELF5	M01197	2.29368	2.5083e-14	6.24566e-12
/EMBO10/Sfpi1_RC	PBM0111	1.81458	3.01722e-14	7.51289e-12
/EMBO10/Elf5	PBM0125	1.95296	5.44947e-14	1.35692e-11
SPI1	M01203	1.50392	6.05257e-14	1.50709e-11
/EMBO10/Elf5_RC	PBM0106	2.02154	7.69961e-14	1.9172e-11
GCN4	M00204	2.39314	3.90661e-13	9.72747e-11
Bach1	M00495	2.18047	2.96786e-11	7.38998e-09
Elf-1	M00746	1.7117	3.37837e-11	8.41215e-09
RITA-1	M00660	1.54245	6.06494e-11	1.51017e-08
AP-1	M00517	2.083	1.23441e-10	3.07367e-08
Pitx2	M00482	1.16505	1.41697e-10	3.52825e-08
GCN4	M00038	1.94658	3.09393e-10	7.70389e-08
AP-1	M00199	1.94461	5.18442e-10	1.29092e-07
Ets	M00771	1.43003	6.265e-10	1.55999e-07
/EMBO10/Elf3	PBM0123	1.72838	1.47489e-09	3.67246e-07
Bach2	M00490	2.10441	1.91685e-09	4.77294e-07
IRF-2	M00063	1.54666	2.59591e-09	6.46382e-07
NF-E2	M00037	1.8857	1.04754e-08	2.60838e-06
E74A	M00016	2.20228	2.43594e-08	6.06548e-06
/Cell09/HLH-4_RC	PBM0190	1.03027	3.75222e-08	9.34302e-06
c-Ets-1	M00339	1.17341	8.38554e-08	2.088e-05
/EMBO10/Ehf	PBM0117	1.70296	1.6002e-07	3.98451e-05
IRF-1	M00062	1.26642	3.10446e-07	7.73011e-05
GCN4	M01713	2.05999	3.17734e-07	7.91157e-05
Nrf-2	M00821	1.70545	4.05369e-07	0.000100937
IRF2	MA0051.1	1.41204	6.16357e-07	0.000153473
CBF1	M00303	1.6583	8.54579e-07	0.00021279
USF	M00121	1.93867	9.1336e-07	0.000227427
GC	M00255	0.852771	1.6406e-06	0.000408509
c-Ets-2	M00340	1.34535	1.85641e-06	0.000462246
Klf4	MA0039.2	0.89147	2.0512e-06	0.000510748
NRSF	M01028	2.50585	2.71479e-06	0.000675982
BRF-1	M01747	1.4555	3.72149e-06	0.000926652
CREB	M00039	2.35922	7.57233e-06	0.00188551
/Cell09/HLH-30_RC	PBM0141	2.28227	7.67369e-06	0.00191075
/Cell09/HLH-30	PBM0177	2.28227	7.67369e-06	0.00191075
/EMBO10/Ehf_RC	PBM0120	1.47907	9.22379e-06	0.00229672
ELF5	MA0136.1	1.85124	1.20941e-05	0.00301143
GABP-beta	M01876	1.29587	1.32235e-05	0.00329265
RFX1	M00281	2.33663	1.34241e-05	0.0033426
FLI1	M01208	1.76232	1.42761e-05	0.00355476
MafK	M02022	2.02546	1.62069e-05	0.00403552
ZF5	M00716	1.58214	2.1101e-05	0.00525415
CPRF-3	M00944	1.42894	2.66122e-05	0.00662644
SP4	M01273	0.883088	2.67885e-05	0.00667033
AP-1	M00174	1.5725	2.92628e-05	0.00728644
EHF	M01974	1.92449	3.05229e-05	0.0076002
ATF1	M00691	2.64885	5.09867e-05	0.0126957
DEAF1	M01001	2.73673	5.1353e-05	0.0127869
/EMBO10/Elf4	PBM0124	1.74987	5.30028e-05	0.0131977
CTCF	MA0139.1	1.58318	5.36881e-05	0.0133683
CTCF	M01259	1.19784	5.65219e-05	0.014074
/EMBO10/Elf2	PBM0122	1.90025	6.1309e-05	0.0152659
Sp1	M00933	0.7912	6.75311e-05	0.0168152
/EMBO10/Elf2_RC	PBM0113	1.78417	7.34129e-05	0.0182798
ATF3	M00513	2.01662	8.71526e-05	0.021701
TCF11:MafG	M00284	1.45314	9.10909e-05	0.0226816
MAF	M00648	1.15149	9.46048e-05	0.0235566
alpha-CP1	M00687	1.51613	9.79434e-05	0.0243879
Tel-2	M00678	1.7254	9.86832e-05	0.0245721
Elk-1	M00007	2.3884	0.000132219	0.0329225
MAF	M00983	1.7735	0.000194844	0.048516
CHA4	M01916	1.40341	0.000198362	0.049392
TGA2	M01586	2.47477	0.00021154	0.0526735
GKLF	M01588	0.740965	0.000220806	0.0549806
GABP	M00341	1.61321	0.000255862	0.0637097
KROX	M00982	0.735573	0.000365113	0.0909131
/EMBO10/Ets1_RC	PBM0112	1.59968	0.000388115	0.0966407
/EMBO10/Etv3_RC	PBM0108	2.18155	0.000403292	0.10042
TFEB	M01768	1.67156	0.00042299	0.105324
ATF	M00338	2.24955	0.000522934	0.13021
Sp1	M00196	0.708431	0.000611265	0.152205
MIG1	M01961	0.500336	0.000673149	0.167614
HAC1	M01610	0.839008	0.000734421	0.182871
SREBP-1	M00220	1.0315	0.000773237	0.192536
/EMBO10/Elf4_RC	PBM0118	1.57551	0.000778234	0.19378
/EMBO10/Elk1_RC	PBM0119	1.67109	0.000926354	0.230662
/EMBO10/Etv4_RC	PBM0132	2.13922	0.000970742	0.241715
Sp1	M00931	0.617335	0.00114288	0.284577
ERG	M01985	2.34005	0.00118195	0.294306
STF1	M01187	2.5218	0.00142186	0.354044
Stp2	M01560	3.54351	0.00152286	0.379192
/EMBO10/Elk1	PBM0129	1.5969	0.00178692	0.444943
/EMBO10/Ets1	PBM0098	1.31137	0.0021406	0.53301
EGR1/	M01972	1.27304	0.00226586	0.564199
ERG	M01752	1.47362	0.00253291	0.630696
/EMBO10/Gm4881_RC	PBM0097	2.00736	0.00275807	0.686758
/GR09/Stp2	PBM0041	2.84224	0.00313257	0.780011
/EMBO10/Erg	PBM0121	1.29241	0.00339888	0.846322
GABP	M01258	1.14025	0.00344027	0.856627
/EMBO10/Etv3	PBM0102	1.80661	0.00346079	0.861737
REST	MA0138.2	3.22404	0.00365043	0.908958
Sp1	M00932	0.581302	0.00368655	0.91795
v-Jun	M00036	1.46771	0.00402134	1
STF1	M01186	2.03795	0.00416085	1
ELF5	M01980	1.69219	0.00420552	1
NFE2L2	MA0150.1	0.972788	0.0047971	1
SP1	MA0079.2	0.485832	0.00480101	1
Egr1	MA0162.1	1.15349	0.0056292	1
CREB	M00917	2.42857	0.0059907	1
ATF-2	M01862	4.22034	0.00621667	1
ARR10	M01050	1.50076	0.00692911	1
Egr-3	M00245	2.13099	0.00702094	1
/EMBO10/Elk3	PBM0130	1.41175	0.00738431	1
Pet-1	M02037	2.03157	0.00756468	1
/EMBO10/Gm5454_RC	PBM0135	1.72844	0.00770472	1
GABPA	MA0062.2	1.0309	0.00834813	1
YRM1	M01932	2.32886	0.00839215	1
Zfp206	M01742	-2.31018	0.00893967	1
CREM	M01820	2.30341	0.0091513	1
/EMBO10/Gm5454	PBM0126	1.54784	0.0101873	1
SAP1A	M01983	1.85511	0.0107478	1
/EMBO10/Etv4	PBM0103	1.42933	0.0115697	1
Stra13	M00985	1.34108	0.0139401	1
/EMBO10/Erg_RC	PBM0096	1.06265	0.0155507	1
CREB	M00916	1.87905	0.0158975	1
ELK-1	M01981	1.8762	0.0160742	1
Egr-2	M00246	1.50114	0.0164486	1
znf143	MA0088.1	0.732162	0.0165135	1
CTCF	M01200	0.719498	0.0169041	1
CREB,	M00981	1.84231	0.0180911	1
NRSE	M00325	1.25343	0.0194212	1
/EMBO10/Etv1_RC	PBM0095	1.17525	0.0198435	1
/GR09/Ykl222c	PBM0022	2.37553	0.0198957	1
UGA3	M01622	0.416786	0.0205769	1
/EMBO10/Gabpa	PBM0101	1.62321	0.0206167	1
SRF	M00152	2.20611	0.0218066	1
CREB	M00177	2.12032	0.022828	1
/EMBO10/Etv5_RC	PBM0116	1.46838	0.0228869	1
Fli-1	M02038	1.89369	0.0250227	1
ETV3	M01990	1.88325	0.025835	1
/EMBO10/Fli1_RC	PBM0107	1.12599	0.0285574	1
/GR09/Cha4	PBM0086	1.07413	0.0299918	1
ELF1	M01975	1.30894	0.0341409	1
Elk-1	M01163	1.33411	0.0343578	1
/EMBO10/Gm4881	PBM0127	1.30317	0.0349548	1
ELK4	MA0076.1	1.68206	0.0361742	1
/EMBO10/Etv5	PBM0104	1.31934	0.0363963	1
NRF-2/GABP	M00108	1.31646	0.0368269	1
ELF2	M01976	1.67567	0.0368788	1
/EMBO10/Etv6_RC	PBM0094	1.40381	0.0390464	1
CBF1	M01911	0.83861	0.0398307	1
HY5	M01584	1.03644	0.0426216	1
Put3	M01525	1.62465	0.0435511	1
Egr-1	M00243	1.43842	0.0462026	1
/EMBO10/Gabpa_RC	PBM0109	1.43752	0.0463297	1
Erm	M01992	1.43714	0.0464355	1
NRSF	M00256	1.73865	0.0545574	1
/EMBO10/Fli1	PBM0114	0.998507	0.0545585	1
GABPalpha	M02039	1.6567	0.0579727	1
ER71	M01988	1.74084	0.0721375	1
CREB	M00178	1.02818	0.0727523	1
ER81	M01987	1.49365	0.0730702	1
/EMBO10/Elk3_RC	PBM0128	0.937334	0.074349	1
ATF-3	M01863	2.96613	0.0750385	1
LYS14	M01946	1.54356	0.0772975	1
c-Ets-1	M01078	1.0718	0.0774448	1
Cha4	M01518	0.902018	0.0776307	1
Whn	M00332	1.51888	0.0822117	1
WT1	M02036	0.675453	0.083902	1
c-ets-1	M01986	1.4345	0.0851315	1
Net	M01982	1.27606	0.0875337	1
/EMBO10/Elk4_RC	PBM0115	0.998077	0.0948609	1
/EMBO10/Elk4	PBM0131	0.990757	0.0973027	1
PDR8	M01613	0.513363	0.0997097	1
/EMBO10/Etv1	PBM0100	0.832562	0.105383	1
REST	M01256	0.776872	0.134137	1
/GR09/Hal9	PBM0007	1.64037	0.136657	1
/NBT06/Zif268	PBM0203	0.688382	0.139633	1
ELF3	M01977	1.14013	0.143495	1
Elk-1	M00025	1.32037	0.147996	1
/EMBO10/Etv6	PBM0105	0.912931	0.165724	1
NF-1	M00806	0.603057	0.173533	1
ATF	M00017	1.03896	0.182507	1
SP2	M01783	-0.542762	0.212592	1
NGFI-C	M00244	0.8053	0.236473	1
SP1:SP3	M01219	0.296967	0.237188	1
Ets2	M01989	0.995737	0.238642	1
E2F-1	M00431	0.649094	0.239898	1
ATF2	M00179	1.12758	0.244142	1
Elk-1	M01165	0.582905	0.256686	1
CEP3	M01852	0.630256	0.259005	1
Ykl222c	M01960	0.844853	0.278295	1
CBF1	M01794	0.756426	0.287514	1
SQUA	M01164	0.3304	0.293998	1
RSC30	M01520	0.65763	0.333687	1
Spi-B	M02041	0.979145	0.337258	1
/GR09/Rsc30	PBM0053	0.647895	0.340895	1
SPI1	M02043	0.969517	0.342034	1
ERF	M01984	1.02284	0.35342	1
Arnt	M00539	0.441578	0.356007	1
ELF4	M01979	0.803525	0.388362	1
MEF-2	M00231	0.236652	0.400912	1
/GR09/Rgt1	PBM0012	0.535525	0.406632	1
E2F	M00425	-1.26299	0.417789	1
CREB	M00113	0.709301	0.432947	1
NF-Y	M00287	0.365627	0.456066	1
ABI4	M00958	0.399671	0.464777	1
PDR1	M01633	0.245571	0.52954	1
USF	M00187	0.503056	0.540926	1
ELK1	MA0028.1	1.10866	0.586961	1
c-Ets-1(p54)	M00032	0.535896	0.611107	1
LEU3	M00306	-0.577678	0.617565	1
/GR09/Rsc3	PBM0052	-0.817616	0.623662	1
Rsc3	M01551	-0.784939	0.637599	1
NFYA	MA0060.1	0.230081	0.649566	1
TGA1b	M00375	0.362974	0.688265	1
E2F	M00516	-0.60538	0.707481	1
Spic	M02042	0.284535	0.723702	1
Staf	M00262	0.21291	0.726269	1
CEP3	M01544	0.282869	0.754459	1
RSC30	M01899	-0.123803	0.755089	1
Tye7	M01558	-0.0877482	0.850212	1
/GR09/Tye7	PBM0063	-0.0817846	0.860282	1
Rgt1	M01557	0.102965	0.871449	1
YY1	M01035	0.174365	0.88233	1
Rb:E2F-1:DP-1	M00740	0.107061	0.914393	1
/GR09/Cep3	PBM0060	0.0942405	0.915065	1
UAY	M00391	-0.0528741	0.965071	1
SAP-1a	M01167	-0.0350186	0.971405	1
