# Supplementary material for: Bacterial infection remodels the DNA methylation landscape of human dendritic cells
Source: HighWire-hosted journal article supplement (doi:10.1101/gr.192005.115), 2015-09-21
Supplement: TableS6_DEG.xlsx [file TableS6_DEG.xlsx]

## Sheet: Sheet1
Supplementary Table 6: List of protein-coding genes ranked by statistical evidence of differential expression after MTB infection.
Ensembl gene ID	Hugo gene ID	log2FCa	P-value	FDRb
ENSG00000137507	LRRC32	6.85877	1.33171e-129	3.80295e-125
ENSG00000102221	JADE3	5.17811	1.01162e-87	1.44443e-83
ENSG00000149564	ESAM	-4.60345	2.01478e-77	1.4384e-73
ENSG00000150907	FOXO1	3.26687	1.75964e-77	1.4384e-73
ENSG00000123689	G0S2	7.27809	8.33808e-74	3.96851e-70
ENSG00000163082	SGPP2	6.34189	1.01277e-73	4.13165e-70
ENSG00000008513	ST3GAL1	3.031	1.49064e-67	5.32103e-64
ENSG00000204160	ZDHHC18	2.77216	2.6701e-67	8.47223e-64
ENSG00000010818	HIVEP2	5.34871	3.7817e-64	1.07994e-60
ENSG00000173404	INSM1	8.33322	3.9268e-62	1.01943e-58
ENSG00000118257	NRP2	4.53109	1.02437e-57	2.0895e-54
ENSG00000140519	RHCG	8.04645	9.38851e-57	1.78739e-53
ENSG00000165806	CASP7	3.56382	1.4643e-56	2.61351e-53
ENSG00000046604	DSG2	6.12927	8.31337e-56	1.3965e-52
ENSG00000120129	DUSP1	4.29431	2.1468e-55	3.4059e-52
ENSG00000175130	MARCKSL1	4.67562	6.78889e-55	1.02037e-51
ENSG00000090104	RGS1	6.33532	1.68454e-54	2.40528e-51
ENSG00000130940	CASZ1	3.56398	1.51061e-52	2.05422e-49
ENSG00000135362	PRR5L	3.79506	5.5941e-52	7.15686e-49
ENSG00000166396	SERPINB7	10.5187	5.76419e-52	7.15686e-49
ENSG00000123342	MMP19	4.80815	1.73046e-51	1.97667e-48
ENSG00000133069	TMCC2	3.53433	3.61321e-51	3.91956e-48
ENSG00000171595	DNAI2	6.43636	3.70586e-51	3.91956e-48
ENSG00000087494	PTHLH	8.08686	9.40485e-51	9.59194e-48
ENSG00000130164	LDLR	2.79994	1.61471e-50	1.59004e-47
ENSG00000144476	ACKR3	6.71662	4.7666e-50	4.53733e-47
ENSG00000139116	KIF21A	4.50947	5.61653e-50	5.01222e-47
ENSG00000164929	BAALC	6.18057	5.53663e-50	5.01222e-47
ENSG00000163389	POGLUT1	3.33127	7.36093e-50	6.36988e-47
ENSG00000133639	BTG1	4.22148	1.73289e-49	1.41389e-46
ENSG00000159173	TNNI1	3.54193	9.34315e-49	7.41146e-46
ENSG00000008517	IL32	4.23877	1.02508e-48	7.91171e-46
ENSG00000236939	C8orf56	11.6122	2.00126e-48	1.50395e-45
ENSG00000174946	GPR171	5.81959	4.10029e-48	2.9273e-45
ENSG00000109099	PMP22	3.87531	1.27206e-47	8.86002e-45
ENSG00000118503	TNFAIP3	4.90882	3.49073e-47	2.31825e-44
ENSG00000139567	ACVRL1	4.14688	5.02068e-47	3.25854e-44
ENSG00000162783	IER5	2.66647	6.47479e-47	4.1089e-44
ENSG00000138772	ANXA3	5.13132	8.30634e-47	5.15661e-44
ENSG00000137673	MMP7	6.11228	9.47456e-47	5.7567e-44
ENSG00000176454	LPCAT4	-3.19297	7.68788e-45	4.48047e-42
ENSG00000140379	BCL2A1	6.86744	9.73175e-45	5.55819e-42
ENSG00000116815	CD58	2.0684	1.01819e-44	5.70125e-42
ENSG00000125733	TRIP10	3.56634	1.30841e-44	7.04986e-42
ENSG00000119801	YPEL5	2.82128	1.62064e-44	8.57047e-42
ENSG00000159166	LAD1	7.29856	1.16214e-43	6.03404e-41
ENSG00000137265	IRF4	2.35606	1.58329e-43	7.93229e-41
ENSG00000176177	ENTHD1	9.08052	1.55814e-43	7.93229e-41
ENSG00000162772	ATF3	4.51179	3.04206e-43	1.4978e-40
ENSG00000185215	TNFAIP2	4.82747	1.25922e-42	6.09485e-40
ENSG00000141497	ZMYND15	2.93749	2.83384e-42	1.34877e-39
ENSG00000176142	TMEM39A	1.9215	1.02811e-41	4.81306e-39
ENSG00000123358	NR4A1	4.94159	1.41038e-41	6.39305e-39
ENSG00000117036	ETV3	3.72469	1.62993e-41	7.27282e-39
ENSG00000090339	ICAM1	2.69486	1.75287e-41	7.70103e-39
ENSG00000172183	ISG20	7.05576	1.95555e-41	8.4613e-39
ENSG00000167604	NFKBID	2.87291	3.53041e-41	1.50474e-38
ENSG00000152784	PRDM8	3.25853	7.81048e-41	3.28006e-38
ENSG00000113302	IL12B	8.83409	1.63231e-40	6.75565e-38
ENSG00000161011	SQSTM1	2.57427	2.04201e-40	8.33054e-38
ENSG00000168685	IL7R	4.30651	2.16034e-40	8.68913e-38
ENSG00000183044	ABAT	-3.05358	3.29717e-40	1.30774e-37
ENSG00000169508	GPR183	2.67426	6.1017e-40	2.38693e-37
ENSG00000136695	IL36RN	10.17	7.29586e-40	2.81551e-37
ENSG00000123374	CDK2	4.02126	9.55984e-40	3.64e-37
ENSG00000135245	HILPDA	2.51064	1.44938e-39	5.30639e-37
ENSG00000196782	MAML3	-3.38147	1.43377e-39	5.30639e-37
ENSG00000257242	C12orf79	5.04589	1.44136e-39	5.30639e-37
ENSG00000177340	AC024940.1	3.68512	1.83447e-39	6.63125e-37
ENSG00000186197	EDARADD	6.00993	3.15211e-39	1.12518e-36
ENSG00000121966	CXCR4	4.16238	3.95465e-39	1.39423e-36
ENSG00000136560	TANK	3.38929	5.00886e-39	1.74437e-36
ENSG00000135604	STX11	2.64396	1.36913e-38	4.71063e-36
ENSG00000105246	EBI3	7.35614	1.42547e-38	4.84608e-36
ENSG00000129667	RHBDF2	3.97584	3.74615e-38	1.25857e-35
ENSG00000168758	SEMA4C	4.53717	5.71208e-38	1.89674e-35
ENSG00000167513	CDT1	2.37349	7.04009e-38	2.31085e-35
ENSG00000134369	NAV1	4.87484	7.95364e-38	2.58105e-35
ENSG00000161835	GRASP	5.20649	9.60935e-38	3.0833e-35
ENSG00000112294	ALDH5A1	-3.53637	1.33927e-37	4.2495e-35
ENSG00000154655	L3MBTL4	5.50717	1.81399e-37	5.63067e-35
ENSG00000171522	PTGER4	2.32067	1.80369e-37	5.63067e-35
ENSG00000146278	PNRC1	3.33939	2.12794e-37	6.53415e-35
ENSG00000184371	CSF1	2.10503	2.48568e-37	7.55143e-35
ENSG00000055957	ITIH1	4.12545	3.19938e-37	9.61734e-35
ENSG00000138172	CALHM2	-3.06579	4.28916e-37	1.26003e-34
ENSG00000186583	SPATC1	4.55657	4.48684e-37	1.29425e-34
ENSG00000109320	NFKB1	4.04469	4.54354e-37	1.2975e-34
ENSG00000188676	IDO2	5.11905	6.77291e-37	1.89622e-34
ENSG00000136111	TBC1D4	4.86218	7.3219e-37	2.0105e-34
ENSG00000149289	ZC3H12C	4.70822	8.01141e-37	2.17887e-34
ENSG00000134470	IL15RA	5.92759	8.62518e-37	2.32367e-34
ENSG00000146674	IGFBP3	7.58657	9.08052e-37	2.42348e-34
ENSG00000101134	DOK5	7.95152	1.6164e-36	4.27402e-34
ENSG00000186205	MARC1	-4.10524	1.74398e-36	4.56908e-34
ENSG00000101977	MCF2	3.90703	3.60594e-36	9.36136e-34
ENSG00000163449	TMEM169	3.96707	5.21796e-36	1.33044e-33
ENSG00000176619	LMNB2	2.16309	6.64845e-36	1.68017e-33
ENSG00000165124	SVEP1	5.13343	7.02107e-36	1.75878e-33
ENSG00000122025	FLT3	4.08197	9.12225e-36	2.24896e-33
ENSG00000178764	ZHX2	2.45762	9.13539e-36	2.24896e-33
ENSG00000099860	GADD45B	3.76527	9.64063e-36	2.35305e-33
ENSG00000197872	FAM49A	2.42499	1.42157e-35	3.41142e-33
ENSG00000180758	GPR157	6.74391	1.76938e-35	4.21069e-33
ENSG00000018189	RUFY3	2.35362	1.8569e-35	4.38245e-33
ENSG00000148677	ANKRD1	8.31949	2.71675e-35	6.35919e-33
ENSG00000070190	DAPP1	4.04447	2.78036e-35	6.45518e-33
ENSG00000105642	KCNN1	4.86946	3.26851e-35	7.52732e-33
ENSG00000166016	ABTB2	6.1948	3.90313e-35	8.90176e-33
ENSG00000013374	NUB1	3.37635	6.65469e-35	1.48467e-32
ENSG00000101974	ATP11C	3.34577	6.89347e-35	1.52602e-32
ENSG00000155307	SAMSN1	3.22382	9.01096e-35	1.97943e-32
ENSG00000124466	LYPD3	2.67684	9.77095e-35	2.12999e-32
ENSG00000143333	RGS16	4.66552	1.15276e-34	2.49389e-32
ENSG00000128271	ADORA2A	5.73023	2.97316e-34	6.36272e-32
ENSG00000095951	HIVEP1	5.03711	3.75347e-34	7.93984e-32
ENSG00000138378	STAT4	3.42315	4.04254e-34	8.48844e-32
ENSG00000149212	SESN3	3.43154	5.57982e-34	1.16309e-31
ENSG00000119523	ALG2	1.67467	6.78099e-34	1.40322e-31
ENSG00000148154	UGCG	3.74507	8.65319e-34	1.77776e-31
ENSG00000179361	ARID3B	2.15713	9.27946e-34	1.89281e-31
ENSG00000171130	ATP6V0E2	-2.96399	1.34242e-33	2.68081e-31
ENSG00000089351	GRAMD1A	3.79145	1.40419e-33	2.78468e-31
ENSG00000109654	TRIM2	4.64356	1.4726e-33	2.90022e-31
ENSG00000158270	COLEC12	3.76178	3.12995e-33	6.12205e-31
ENSG00000170873	MTSS1	3.80871	3.27441e-33	6.36105e-31
ENSG00000176076	KCNE1L	5.84617	3.59665e-33	6.93984e-31
ENSG00000105855	ITGB8	5.53693	4.63104e-33	8.87575e-31
ENSG00000026751	SLAMF7	6.59294	5.17013e-33	9.84289e-31
ENSG00000163577	EIF5A2	2.40306	5.51463e-33	1.04292e-30
ENSG00000172817	CYP7B1	6.82615	1.25436e-32	2.32603e-30
ENSG00000073803	MAP3K13	2.22536	1.30661e-32	2.40727e-30
ENSG00000152804	HHEX	-3.48085	1.41037e-32	2.58179e-30
ENSG00000087085	ACHE	5.8318	1.4522e-32	2.64144e-30
ENSG00000122641	INHBA	6.42483	2.22062e-32	3.98832e-30
ENSG00000115165	CYTIP	3.19959	2.44177e-32	4.3581e-30
ENSG00000019102	VSIG2	-6.02238	2.7037e-32	4.79562e-30
ENSG00000113657	DPYSL3	4.01686	2.99617e-32	5.28158e-30
ENSG00000056558	TRAF1	5.41779	3.10546e-32	5.44065e-30
ENSG00000100906	NFKBIA	3.14787	3.2364e-32	5.63548e-30
ENSG00000134107	BHLHE40	1.77815	3.90893e-32	6.76529e-30
ENSG00000138166	DUSP5	3.83302	4.23364e-32	7.28313e-30
ENSG00000179399	GPC5	4.14932	5.49473e-32	9.39599e-30
ENSG00000205755	CRLF2	8.66248	5.59968e-32	9.51845e-30
ENSG00000106537	TSPAN13	4.91005	7.60963e-32	1.27828e-29
ENSG00000143942	CHAC2	2.56981	7.56999e-32	1.27828e-29
ENSG00000082438	COBLL1	4.5899	1.21431e-31	2.01611e-29
ENSG00000102096	PIM2	3.59247	1.40756e-31	2.32346e-29
ENSG00000156298	TSPAN7	-5.78127	1.42025e-31	2.33093e-29
ENSG00000164404	GDF9	-3.73853	1.65673e-31	2.7035e-29
ENSG00000120833	SOCS2	4.6185	1.71513e-31	2.7829e-29
ENSG00000126353	CCR7	7.3524	1.72517e-31	2.78337e-29
ENSG00000092853	CLSPN	2.62942	1.80379e-31	2.8777e-29
ENSG00000074416	MGLL	5.41333	1.96707e-31	3.12076e-29
ENSG00000131203	IDO1	8.72046	1.98554e-31	3.13266e-29
ENSG00000144802	NFKBIZ	5.18493	2.15347e-31	3.37893e-29
ENSG00000148516	ZEB1	2.59301	2.81922e-31	4.39937e-29
ENSG00000206073	SERPINB4	11.0976	3.1083e-31	4.82412e-29
ENSG00000158615	PPP1R15B	2.87127	3.23152e-31	4.98824e-29
ENSG00000154548	SRSF12	4.30374	3.31647e-31	5.09186e-29
ENSG00000188452	CERKL	2.43451	5.46639e-31	8.34779e-29
ENSG00000154146	NRGN	-6.26892	6.98151e-31	1.06048e-28
ENSG00000139146	FAM60A	3.64679	7.51277e-31	1.13514e-28
ENSG00000112972	HMGCS1	3.25705	7.88601e-31	1.18527e-28
ENSG00000177842	ZNF620	3.2466	8.2013e-31	1.2262e-28
ENSG00000104885	DOT1L	1.96305	1.07311e-30	1.59609e-28
ENSG00000198223	CSF2RA	2.28033	1.08425e-30	1.6043e-28
ENSG00000166676	TVP23A	2.45383	1.12687e-30	1.65876e-28
ENSG00000155380	SLC16A1	-2.42719	1.26724e-30	1.85583e-28
ENSG00000077150	NFKB2	2.95722	1.2891e-30	1.87821e-28
ENSG00000196850	PPTC7	2.24698	1.68092e-30	2.43664e-28
ENSG00000205189	ZBTB10	3.06512	1.75281e-30	2.52804e-28
ENSG00000112149	CD83	4.23422	2.52422e-30	3.62232e-28
ENSG00000106123	EPHB6	-3.47333	3.05069e-30	4.35593e-28
ENSG00000184602	SNN	3.16323	3.81278e-30	5.417e-28
ENSG00000133027	PEMT	-3.56115	4.59405e-30	6.49467e-28
ENSG00000141150	RASL10B	4.8508	4.8734e-30	6.85566e-28
ENSG00000107021	TBC1D13	3.33385	5.52344e-30	7.73201e-28
ENSG00000135338	LCA5	3.14871	6.00958e-30	8.37149e-28
ENSG00000154511	FAM69A	2.48112	6.05831e-30	8.39841e-28
ENSG00000162924	REL	4.92983	7.88868e-30	1.08829e-27
ENSG00000139597	N4BP2L1	4.31796	1.18216e-29	1.62303e-27
ENSG00000166128	RAB8B	3.58555	1.25031e-29	1.70838e-27
ENSG00000141542	RAB40B	-2.75006	1.53404e-29	2.07618e-27
ENSG00000072422	RHOBTB1	-3.73826	1.58803e-29	2.13913e-27
ENSG00000130066	SAT1	3.55971	1.7327e-29	2.32304e-27
ENSG00000165704	HPRT1	2.09973	2.504e-29	3.34143e-27
ENSG00000196639	HRH1	-4.6794	2.66786e-29	3.54353e-27
ENSG00000163545	NUAK2	5.09539	2.97036e-29	3.90897e-27
ENSG00000166347	CYB5A	2.81115	3.32034e-29	4.34949e-27
ENSG00000166845	C18orf54	2.98956	3.36752e-29	4.39116e-27
ENSG00000095303	PTGS1	-4.00694	5.90334e-29	7.6628e-27
ENSG00000117020	AKT3	3.89445	6.06155e-29	7.83257e-27
ENSG00000028137	TNFRSF1B	2.06453	6.55038e-29	8.42609e-27
ENSG00000113368	LMNB1	3.93261	6.75958e-29	8.61756e-27
ENSG00000134460	IL2RA	8.69625	8.57878e-29	1.084e-26
ENSG00000128872	TMOD2	2.69381	1.70744e-28	2.13857e-26
ENSG00000137193	PIM1	3.92855	1.70201e-28	2.13857e-26
ENSG00000064042	LIMCH1	6.02235	1.74174e-28	2.17201e-26
ENSG00000123610	TNFAIP6	7.26382	1.93945e-28	2.40803e-26
ENSG00000069020	MAST4	2.63476	3.34862e-28	4.13968e-26
ENSG00000143164	DCAF6	2.41103	3.92026e-28	4.82546e-26
ENSG00000136371	MTHFS	4.21728	3.94276e-28	4.83234e-26
ENSG00000122863	CHST3	3.57096	4.31223e-28	5.26258e-26
ENSG00000100336	APOL4	-3.77148	4.62697e-28	5.62265e-26
ENSG00000134871	COL4A2	5.06428	5.23919e-28	6.33965e-26
ENSG00000183484	GPR132	2.90211	6.68968e-28	8.06064e-26
ENSG00000101109	STK4	3.41272	7.14421e-28	8.57215e-26
ENSG00000141682	PMAIP1	5.86233	7.47581e-28	8.9325e-26
ENSG00000211689	TRGC1	5.60722	7.92286e-28	9.42721e-26
ENSG00000171227	TMEM37	-5.86492	8.33193e-28	9.87282e-26
ENSG00000211692	TRGJP1	5.93218	9.41648e-28	1.11118e-25
ENSG00000121594	CD80	4.26771	1.01866e-27	1.19711e-25
ENSG00000111012	CYP27B1	5.23828	1.03805e-27	1.2149e-25
ENSG00000168356	SCN11A	3.64105	1.05769e-27	1.23283e-25
ENSG00000178038	ALS2CL	3.5905	1.15402e-27	1.32884e-25
ENSG00000154889	MPPE1	-2.02312	1.23481e-27	1.41616e-25
ENSG00000073712	FERMT2	6.9524	1.33995e-27	1.51845e-25
ENSG00000131459	GFPT2	7.37996	1.37338e-27	1.55018e-25
ENSG00000100523	DDHD1	2.12773	1.6448e-27	1.84923e-25
ENSG00000125731	SH2D3A	2.77363	1.80798e-27	2.02473e-25
ENSG00000138964	PARVG	-2.9187	2.25715e-27	2.51787e-25
ENSG00000114982	KANSL3	1.7414	2.5459e-27	2.82892e-25
ENSG00000116962	NID1	6.25055	2.99763e-27	3.31795e-25
ENSG00000119508	NR4A3	4.81458	3.1253e-27	3.44592e-25
ENSG00000170915	PAQR8	-3.42885	3.82679e-27	4.20314e-25
ENSG00000187260	WDR86	3.54604	4.62556e-27	5.061e-25
ENSG00000151287	TEX30	2.34696	4.70985e-27	5.13356e-25
ENSG00000008118	CAMK1G	6.33006	4.96716e-27	5.39343e-25
ENSG00000068796	KIF2A	3.45746	5.91642e-27	6.38867e-25
ENSG00000165507	C10orf10	4.63662	5.95086e-27	6.38867e-25
ENSG00000120217	CD274	2.83769	7.22997e-27	7.73282e-25
ENSG00000111846	GCNT2	2.56453	9.64582e-27	1.02782e-24
ENSG00000176928	GCNT4	5.44264	1.07575e-26	1.14201e-24
ENSG00000057704	TMCC3	4.62542	1.19291e-26	1.26171e-24
ENSG00000182973	CNOT10	2.5282	1.23549e-26	1.30192e-24
ENSG00000143061	IGSF3	5.70287	1.48823e-26	1.55107e-24
ENSG00000172724	CCL19	4.92738	1.84744e-26	1.91845e-24
ENSG00000137571	SLCO5A1	5.20835	2.05013e-26	2.12122e-24
ENSG00000092758	COL9A3	-3.57568	2.15089e-26	2.21743e-24
ENSG00000173409	ARV1	-3.44254	2.31291e-26	2.37589e-24
ENSG00000096696	DSP	4.50369	2.48452e-26	2.54302e-24
ENSG00000065911	MTHFD2	2.71403	2.57754e-26	2.62882e-24
ENSG00000175505	CLCF1	5.57367	2.70498e-26	2.74897e-24
ENSG00000162804	SNED1	-2.87519	2.75484e-26	2.78018e-24
ENSG00000005882	PDK2	-1.8958	2.84234e-26	2.85805e-24
ENSG00000151502	VPS26B	-1.47806	3.4694e-26	3.47634e-24
ENSG00000132823	OSER1	1.5908	3.89631e-26	3.89045e-24
ENSG00000112742	TTK	3.02247	4.16548e-26	4.14472e-24
ENSG00000121933	ADORA3	-7.0205	4.5782e-26	4.53957e-24
ENSG00000160013	PTGIR	5.24328	5.723e-26	5.65507e-24
ENSG00000105383	CD33	-4.63863	5.8289e-26	5.73985e-24
ENSG00000156232	WHAMM	2.47353	5.93411e-26	5.82338e-24
ENSG00000169902	TPST1	5.58388	6.00243e-26	5.87026e-24
ENSG00000111300	NAA25	3.13566	7.03808e-26	6.85961e-24
ENSG00000104213	PDGFRL	5.2285	7.26049e-26	7.05231e-24
ENSG00000162643	WDR63	5.17065	7.68515e-26	7.43949e-24
ENSG00000118495	PLAGL1	2.47506	8.14583e-26	7.8588e-24
ENSG00000169855	ROBO1	3.28577	8.2237e-26	7.90721e-24
ENSG00000132972	RNF17	5.33269	8.27139e-26	7.92638e-24
ENSG00000186174	BCL9L	4.55673	8.4253e-26	8.04687e-24
ENSG00000022567	SLC45A4	-2.20317	8.59804e-26	8.18448e-24
ENSG00000125657	TNFSF9	5.85474	8.75833e-26	8.30936e-24
ENSG00000146426	TIAM2	2.59303	9.21869e-26	8.68839e-24
ENSG00000154640	BTG3	2.77148	9.69386e-26	9.10617e-24
ENSG00000104856	RELB	2.31133	1.02095e-25	9.55914e-24
ENSG00000142178	SIK1	3.9386	1.0596e-25	9.88858e-24
ENSG00000184492	FOXD4L1	3.8011	1.25382e-25	1.1663e-23
ENSG00000254122	PCDHGB7	4.89056	1.39301e-25	1.29156e-23
ENSG00000178719	GRINA	2.07025	1.48469e-25	1.37211e-23
ENSG00000152582	SPEF2	3.31753	1.50271e-25	1.38429e-23
ENSG00000101447	FAM83D	3.39099	1.65825e-25	1.51778e-23
ENSG00000197852	FAM212B	-3.71143	1.70262e-25	1.55341e-23
ENSG00000137266	SLC22A23	3.40973	1.79289e-25	1.63056e-23
ENSG00000141540	TTYH2	3.50375	1.951e-25	1.76872e-23
ENSG00000120875	DUSP4	6.40591	2.16557e-25	1.95703e-23
ENSG00000136286	MYO1G	4.25982	2.21784e-25	1.99794e-23
ENSG00000147119	CHST7	5.26849	2.25996e-25	2.02948e-23
ENSG00000164620	RELL2	-3.59841	2.49372e-25	2.22541e-23
ENSG00000069399	BCL3	2.25163	2.85439e-25	2.53934e-23
ENSG00000163297	ANTXR2	1.96793	3.50506e-25	3.10851e-23
ENSG00000158710	TAGLN2	2.94395	3.54549e-25	3.13463e-23
ENSG00000121743	GJA3	6.99563	4.08335e-25	3.59902e-23
ENSG00000198369	SPRED2	4.18261	4.21914e-25	3.70726e-23
ENSG00000176788	BASP1	3.00219	4.84062e-25	4.24029e-23
ENSG00000168546	GFRA2	-6.19975	5.17866e-25	4.52254e-23
ENSG00000076067	RBMS2	-2.92504	5.30848e-25	4.62178e-23
ENSG00000152207	CYSLTR2	4.29548	5.87536e-25	5.09978e-23
ENSG00000167695	FAM57A	4.24239	7.23985e-25	6.26511e-23
ENSG00000166446	CDYL2	4.03933	8.05274e-25	6.92657e-23
ENSG00000196154	S100A4	-4.57395	8.58043e-25	7.3583e-23
ENSG00000089094	KDM2B	2.17146	8.72255e-25	7.45778e-23
ENSG00000025772	TOMM34	3.23714	8.8545e-25	7.548e-23
ENSG00000110436	SLC1A2	5.24391	1.14956e-24	9.77019e-23
ENSG00000185880	TRIM69	1.82114	1.19539e-24	1.01296e-22
ENSG00000119943	PYROXD2	-1.98563	1.26353e-24	1.06753e-22
ENSG00000110077	MS4A6A	-5.61382	1.40476e-24	1.18336e-22
ENSG00000106772	PRUNE2	-3.53232	1.71476e-24	1.43603e-22
ENSG00000184588	PDE4B	5.63158	1.7722e-24	1.47978e-22
ENSG00000137491	SLCO2B1	-3.20192	1.77833e-24	1.48058e-22
ENSG00000050030	KIAA2022	5.8172	1.78979e-24	1.48579e-22
ENSG00000133246	PRAM1	-2.64247	1.89329e-24	1.56715e-22
ENSG00000145882	PCYOX1L	-2.88132	1.92605e-24	1.58966e-22
ENSG00000164136	IL15	3.73786	1.98085e-24	1.63018e-22
ENSG00000154359	LONRF1	1.95393	2.0369e-24	1.67148e-22
ENSG00000104140	RHOV	3.83953	2.12563e-24	1.7393e-22
ENSG00000104946	TBC1D17	1.87801	2.33799e-24	1.9076e-22
ENSG00000243440	AF165138.7	5.45057	2.34913e-24	1.91123e-22
ENSG00000105889	STEAP1B	3.96889	2.56994e-24	2.08494e-22
ENSG00000064655	EYA2	6.36029	2.61989e-24	2.11143e-22
ENSG00000102524	TNFSF13B	2.73976	2.63034e-24	2.11143e-22
ENSG00000115425	PECR	3.03386	2.61735e-24	2.11143e-22
ENSG00000253276	CCDC71L	1.70257	2.63217e-24	2.11143e-22
ENSG00000140398	NEIL1	-1.70505	2.70872e-24	2.16675e-22
ENSG00000019144	PHLDB1	3.01133	3.30144e-24	2.62823e-22
ENSG00000112116	IL17F	9.56777	3.30404e-24	2.62823e-22
ENSG00000198844	ARHGEF15	-5.36594	3.63574e-24	2.88405e-22
ENSG00000181191	PJA1	-1.82371	3.69058e-24	2.91944e-22
ENSG00000170004	CHD3	2.02244	4.60713e-24	3.63442e-22
ENSG00000064201	TSPAN32	-5.0264	4.65285e-24	3.66037e-22
ENSG00000027001	MIPEP	-1.72461	4.67812e-24	3.66894e-22
ENSG00000198759	EGFL6	8.87431	4.68943e-24	3.66894e-22
ENSG00000119698	PPP4R4	8.69493	4.90665e-24	3.82839e-22
ENSG00000128011	LRFN1	-2.8743	5.16836e-24	4.0216e-22
ENSG00000204673	AKT1S1	1.72359	5.21591e-24	4.04758e-22
ENSG00000102554	KLF5	3.15651	5.83882e-24	4.51868e-22
ENSG00000145860	RNF145	1.54729	5.88305e-24	4.5406e-22
ENSG00000179041	RRS1	-2.68084	6.26258e-24	4.8205e-22
ENSG00000142599	RERE	-1.77135	6.71527e-24	5.15505e-22
ENSG00000163864	NMNAT3	-4.93928	7.16034e-24	5.48198e-22
ENSG00000182871	COL18A1	-3.98267	7.3216e-24	5.59045e-22
ENSG00000144655	CSRNP1	2.44404	7.37281e-24	5.61454e-22
ENSG00000171791	BCL2	3.70162	7.47948e-24	5.68063e-22
ENSG00000211688	TRGJP2	7.33655	7.69235e-24	5.8268e-22
ENSG00000185386	MAPK11	2.12723	9.98794e-24	7.54565e-22
ENSG00000168348	INSM2	3.46956	1.16172e-23	8.7303e-22
ENSG00000134317	GRHL1	2.35942	1.31202e-23	9.83395e-22
ENSG00000164211	STARD4	2.80653	1.33918e-23	1.00112e-21
ENSG00000188807	TMEM201	-1.92476	1.48563e-23	1.10771e-21
ENSG00000105639	JAK3	4.30555	1.61699e-23	1.19939e-21
ENSG00000175183	CSRP2	5.49565	1.74512e-23	1.29107e-21
ENSG00000143891	GALM	-3.8797	1.76434e-23	1.30192e-21
ENSG00000047365	ARAP2	3.1813	1.78986e-23	1.31734e-21
ENSG00000164078	MST1R	3.96745	1.86418e-23	1.36852e-21
ENSG00000072571	HMMR	2.71522	2.03503e-23	1.49011e-21
ENSG00000214688	C10orf105	-7.17739	2.05058e-23	1.49766e-21
ENSG00000118308	LRMP	-3.59494	2.06511e-23	1.50442e-21
ENSG00000161010	C5orf45	1.58098	2.08859e-23	1.51765e-21
ENSG00000117791	MARC2	-5.18082	2.0998e-23	1.52193e-21
ENSG00000100852	ARHGAP5	2.68855	2.2005e-23	1.59088e-21
ENSG00000172403	SYNPO2	5.21774	2.66716e-23	1.91854e-21
ENSG00000184557	SOCS3	4.2269	2.69904e-23	1.9366e-21
ENSG00000188290	HES4	5.36152	2.81143e-23	2.01218e-21
ENSG00000123472	ATPAF1	-1.60035	2.90829e-23	2.0763e-21
ENSG00000244165	P2RY11	-2.97659	3.12409e-23	2.22481e-21
ENSG00000125726	CD70	7.52524	3.2066e-23	2.27788e-21
ENSG00000153898	MCOLN2	4.27606	3.33244e-23	2.3614e-21
ENSG00000185272	RBM11	2.90504	3.59185e-23	2.52021e-21
ENSG00000116675	DNAJC6	4.56195	3.67778e-23	2.57418e-21
ENSG00000160293	VAV2	2.60821	3.70795e-23	2.58895e-21
ENSG00000104312	RIPK2	3.85857	4.19951e-23	2.92501e-21
ENSG00000181577	C6orf223	5.40772	4.36122e-23	3.03025e-21
ENSG00000106333	PCOLCE	-3.07752	5.00869e-23	3.46637e-21
ENSG00000143515	ATP8B2	1.92142	5.1118e-23	3.52603e-21
ENSG00000104133	SPG11	2.02463	5.47069e-23	3.75544e-21
ENSG00000101220	C20orf27	-4.19594	5.70316e-23	3.90564e-21
ENSG00000185519	FAM131C	6.98693	6.44029e-23	4.39989e-21
ENSG00000065308	TRAM2	-3.36166	7.25908e-23	4.93566e-21
ENSG00000082781	ITGB5	-3.31146	7.8457e-23	5.32184e-21
ENSG00000114473	IQCG	2.8027	7.88071e-23	5.33293e-21
ENSG00000188483	IER5L	-4.27701	8.23383e-23	5.55871e-21
ENSG00000100024	UPB1	4.57173	8.30308e-23	5.59224e-21
ENSG00000152894	PTPRK	4.66274	8.46669e-23	5.68902e-21
ENSG00000104951	IL4I1	3.33278	8.54973e-23	5.71791e-21
ENSG00000132170	PPARG	2.88665	8.54174e-23	5.71791e-21
ENSG00000163430	FSTL1	5.53781	9.81555e-23	6.54913e-21
ENSG00000196396	PTPN1	2.84259	1.05424e-22	7.01771e-21
ENSG00000126705	AHDC1	-2.10064	1.16639e-22	7.74619e-21
ENSG00000116584	ARHGEF2	2.00974	1.18123e-22	7.82657e-21
ENSG00000186480	INSIG1	1.86177	1.25011e-22	8.26374e-21
ENSG00000139725	RHOF	2.63612	1.32962e-22	8.76904e-21
ENSG00000095585	BLNK	-4.3203	1.3922e-22	9.16059e-21
ENSG00000204366	ZBTB12	-2.80532	1.41475e-22	9.28757e-21
ENSG00000003402	CFLAR	2.94895	1.42835e-22	9.33393e-21
ENSG00000137078	SIT1	-4.62542	1.42813e-22	9.33393e-21
ENSG00000100003	SEC14L2	-1.83399	1.4369e-22	9.36837e-21
ENSG00000071054	MAP4K4	3.1394	1.5242e-22	9.91493e-21
ENSG00000164485	IL22RA2	-5.67624	1.58606e-22	1.02705e-20
ENSG00000077348	EXOSC5	-3.02837	1.60929e-22	1.03974e-20
ENSG00000196684	HSH2D	2.69992	1.65783e-22	1.06869e-20
ENSG00000177453	NIM1K	4.22592	1.66959e-22	1.07384e-20
ENSG00000001561	ENPP4	3.67243	1.73999e-22	1.11661e-20
ENSG00000162337	LRP5	-2.08381	1.79771e-22	1.14592e-20
ENSG00000167925	GHDC	-2.1735	2.03754e-22	1.2959e-20
ENSG00000108669	CYTH1	1.69579	2.62118e-22	1.65459e-20
ENSG00000181788	SIAH2	2.75088	2.62468e-22	1.65459e-20
ENSG00000110330	BIRC2	2.34104	2.75347e-22	1.73195e-20
ENSG00000130511	SSBP4	-2.44845	2.82441e-22	1.77268e-20
ENSG00000186638	KIF24	-2.75813	2.90205e-22	1.81741e-20
ENSG00000156011	PSD3	3.61215	3.10057e-22	1.93749e-20
ENSG00000124216	SNAI1	3.83656	3.11084e-22	1.93965e-20
ENSG00000123728	RAP2C	1.82231	3.22395e-22	2.00581e-20
ENSG00000164236	ANKRD33B	7.42808	3.93646e-22	2.43847e-20
ENSG00000059758	CDK17	2.68735	4.02653e-22	2.48887e-20
ENSG00000127838	PNKD	1.97272	4.60791e-22	2.84208e-20
ENSG00000185905	C16orf54	-2.26651	5.04515e-22	3.10505e-20
ENSG00000115718	PROC	-5.5693	5.11704e-22	3.14252e-20
ENSG00000064225	ST3GAL6	2.88795	5.572e-22	3.41459e-20
ENSG00000163235	TGFA	3.51216	5.60344e-22	3.4265e-20
ENSG00000134070	IRAK2	4.33952	5.74158e-22	3.50347e-20
ENSG00000101265	RASSF2	2.04435	5.8659e-22	3.5717e-20
ENSG00000073605	GSDMB	1.94063	6.08548e-22	3.69751e-20
ENSG00000114529	C3orf52	5.47661	6.3732e-22	3.86411e-20
ENSG00000109861	CTSC	-3.08848	7.13198e-22	4.315e-20
ENSG00000196116	TDRD7	2.12106	7.14957e-22	4.3165e-20
ENSG00000103066	PLA2G15	-2.13345	7.31643e-22	4.40792e-20
ENSG00000114019	AMOTL2	5.23306	7.98637e-22	4.79132e-20
ENSG00000063180	CA11	-3.98906	8.28207e-22	4.9583e-20
ENSG00000104814	MAP4K1	-3.42004	8.96025e-22	5.3531e-20
ENSG00000182162	P2RY8	2.30142	9.21268e-22	5.49241e-20
ENSG00000114013	CD86	3.12794	9.48343e-22	5.64205e-20
ENSG00000158458	NRG2	5.38131	9.63371e-22	5.71954e-20
ENSG00000169327	OR5AU1	4.74293	1.07799e-21	6.38675e-20
ENSG00000110665	C11orf21	-4.23691	1.08676e-21	6.42541e-20
ENSG00000177426	TGIF1	2.29288	1.09337e-21	6.45113e-20
ENSG00000131437	KIF3A	2.99223	1.1723e-21	6.90257e-20
ENSG00000077420	APBB1IP	-3.46174	1.18377e-21	6.95574e-20
ENSG00000079215	SLC1A3	4.19931	1.21768e-21	7.14032e-20
ENSG00000171097	CCBL1	-2.74783	1.27839e-21	7.46563e-20
ENSG00000187239	FNBP1	2.54921	1.28377e-21	7.48178e-20
ENSG00000121210	KIAA0922	3.52393	1.28648e-21	7.48229e-20
ENSG00000169908	TM4SF1	7.41324	1.32172e-21	7.67161e-20
ENSG00000214022	REPIN1	1.77197	1.35344e-21	7.8398e-20
ENSG00000143514	TP53BP2	2.07668	1.55006e-21	8.94241e-20
ENSG00000205784	ARRDC5	-2.78549	1.54988e-21	8.94241e-20
ENSG00000049249	TNFRSF9	6.8821	1.89707e-21	1.09223e-19
ENSG00000167553	TUBA1C	1.55452	2.11604e-21	1.21585e-19
ENSG00000092054	MYH7	5.80931	2.177e-21	1.24836e-19
ENSG00000075884	ARHGAP15	-2.09377	2.2113e-21	1.26549e-19
ENSG00000121380	BCL2L14	4.65067	2.26805e-21	1.29537e-19
ENSG00000109072	VTN	3.47813	2.29201e-21	1.30644e-19
ENSG00000174684	B3GNT1	-2.17372	2.51613e-21	1.42849e-19
ENSG00000152061	RABGAP1L	1.90914	2.65317e-21	1.50245e-19
ENSG00000174083	PIK3R6	-2.50436	2.65692e-21	1.50245e-19
ENSG00000164081	TEX264	-1.73866	2.82068e-21	1.5919e-19
ENSG00000100226	GTPBP1	2.05357	2.97388e-21	1.67505e-19
ENSG00000135472	FAIM2	-6.46281	3.01181e-21	1.69308e-19
ENSG00000164649	CDCA7L	-2.25941	3.04361e-21	1.70759e-19
ENSG00000167034	NKX3-1	4.31594	3.15159e-21	1.76471e-19
ENSG00000104760	FGL1	-6.47446	3.22197e-21	1.80058e-19
ENSG00000180828	BHLHE22	7.08644	3.44235e-21	1.91998e-19
ENSG00000147571	CRH	-3.3273	3.48447e-21	1.93969e-19
ENSG00000162594	IL23R	3.25894	3.64493e-21	2.02326e-19
ENSG00000173391	OLR1	3.82161	3.64878e-21	2.02326e-19
ENSG00000151726	ACSL1	3.12523	3.88443e-21	2.14976e-19
ENSG00000161570	CCL5	4.27269	4.30729e-21	2.37917e-19
ENSG00000071051	NCK2	3.10562	4.66178e-21	2.56506e-19
ENSG00000130475	FCHO1	-2.82553	4.76051e-21	2.61434e-19
ENSG00000087903	RFX2	2.11233	5.2934e-21	2.90141e-19
ENSG00000143450	OAZ3	-3.2625	5.49762e-21	3.00757e-19
ENSG00000183765	CHEK2	-2.24344	5.67142e-21	3.09673e-19
ENSG00000164949	GEM	5.46611	6.26985e-21	3.41695e-19
ENSG00000184014	DENND5A	3.33841	6.40408e-21	3.48346e-19
ENSG00000127328	RAB3IP	1.91553	6.5163e-21	3.53776e-19
ENSG00000167371	PRRT2	3.47039	6.89274e-21	3.73503e-19
ENSG00000172716	SLFN11	-2.39155	7.43999e-21	4.02393e-19
ENSG00000107738	C10orf54	-2.22288	7.64062e-21	4.12464e-19
ENSG00000105472	CLEC11A	-3.52772	7.81693e-21	4.21185e-19
ENSG00000123595	RAB9A	2.14112	7.95946e-21	4.28057e-19
ENSG00000137502	RAB30	2.84187	8.02057e-21	4.30533e-19
ENSG00000174502	SLC26A9	3.20741	8.42968e-21	4.51644e-19
ENSG00000132563	REEP2	-3.17381	8.49116e-21	4.53663e-19
ENSG00000095015	MAP3K1	2.937	8.91342e-21	4.74889e-19
ENSG00000269690	AC096677.1	5.57393	8.99068e-21	4.78113e-19
ENSG00000163644	PPM1K	2.3408	9.15471e-21	4.85931e-19
ENSG00000073111	MCM2	1.65526	1.00405e-20	5.31958e-19
ENSG00000006075	CCL3	3.89934	1.02831e-20	5.43804e-19
ENSG00000136237	RAPGEF5	4.03213	1.04183e-20	5.49937e-19
ENSG00000085831	TTC39A	6.02519	1.04802e-20	5.5218e-19
ENSG00000076662	ICAM3	-2.25589	1.05687e-20	5.5582e-19
ENSG00000128268	MGAT3	1.96736	1.09585e-20	5.7526e-19
ENSG00000132463	GRSF1	2.2233	1.10554e-20	5.79282e-19
ENSG00000165471	MBL2	7.52597	1.15549e-20	6.04347e-19
ENSG00000196787	HIST1H2AG	1.7358	1.23744e-20	6.46025e-19
ENSG00000115232	ITGA4	3.52784	1.42286e-20	7.37432e-19
ENSG00000150967	ABCB9	-3.16974	1.42153e-20	7.37432e-19
ENSG00000104549	SQLE	2.05148	1.60159e-20	8.28563e-19
ENSG00000114744	COMMD2	1.83676	2.12274e-20	1.09224e-18
ENSG00000182168	UNC5C	7.80348	2.19759e-20	1.12872e-18
ENSG00000178607	ERN1	2.29906	2.22253e-20	1.13948e-18
ENSG00000158023	WDR66	-2.28849	2.39174e-20	1.22403e-18
ENSG00000115255	REEP6	-3.30872	2.4294e-20	1.23886e-18
ENSG00000165449	SLC16A9	2.98576	2.42908e-20	1.23886e-18
ENSG00000106477	CEP41	-1.78816	2.55083e-20	1.29847e-18
ENSG00000157927	RADIL	-3.28933	2.60338e-20	1.32051e-18
ENSG00000100580	TMED8	2.12488	3.28621e-20	1.66096e-18
ENSG00000221887	HMSD	5.60381	3.59829e-20	1.81548e-18
ENSG00000214114	MYCBP	-1.49363	3.73557e-20	1.88142e-18
ENSG00000169026	MFSD7	-2.44897	3.91328e-20	1.96745e-18
ENSG00000121552	CSTA	2.68225	3.98114e-20	1.99806e-18
ENSG00000079335	CDC14A	1.63984	4.11913e-20	2.06313e-18
ENSG00000106483	SFRP4	6.88317	4.36229e-20	2.17786e-18
ENSG00000136810	TXN	3.57001	4.7664e-20	2.37547e-18
ENSG00000165752	STK32C	-3.83837	4.92237e-20	2.44892e-18
ENSG00000138030	KHK	-4.05611	5.20655e-20	2.5858e-18
ENSG00000175294	CATSPER1	-3.29171	5.37842e-20	2.66652e-18
ENSG00000135127	CCDC64	3.13381	5.55832e-20	2.75093e-18
ENSG00000163803	PLB1	-2.40281	5.65627e-20	2.79457e-18
ENSG00000185499	MUC1	4.52121	5.67516e-20	2.79906e-18
ENSG00000164038	SLC9B2	4.45601	5.90479e-20	2.9073e-18
ENSG00000171132	PRKCE	2.50072	6.09427e-20	2.99543e-18
ENSG00000096872	IFT74	-1.75855	6.27295e-20	3.07795e-18
ENSG00000125457	MIF4GD	-2.62578	6.59778e-20	3.23178e-18
ENSG00000116132	PRRX1	7.01969	6.82168e-20	3.33573e-18
ENSG00000174485	DENND4A	2.52008	7.28948e-20	3.55839e-18
ENSG00000131669	NINJ1	2.18825	7.30867e-20	3.56167e-18
ENSG00000095397	DFNB31	4.39501	7.38164e-20	3.5911e-18
ENSG00000242550	SERPINB10	4.56144	7.51074e-20	3.64769e-18
ENSG00000055208	TAB2	1.82076	7.68825e-20	3.72756e-18
ENSG00000114354	TFG	1.91627	7.72254e-20	3.73784e-18
ENSG00000162836	ACP6	-2.25234	7.82725e-20	3.78211e-18
ENSG00000115738	ID2	4.48559	8.48778e-20	4.09435e-18
ENSG00000100385	IL2RB	2.28878	8.88461e-20	4.27855e-18
ENSG00000117586	TNFSF4	6.6012	8.91979e-20	4.28826e-18
ENSG00000187091	PLCD1	-2.58273	9.94615e-20	4.77365e-18
ENSG00000101445	PPP1R16B	4.06244	1.00029e-19	4.79285e-18
ENSG00000133195	SLC39A11	-1.64902	1.00858e-19	4.82446e-18
ENSG00000162927	PUS10	2.7008	1.09116e-19	5.20206e-18
ENSG00000120278	PLEKHG1	5.63742	1.12019e-19	5.33154e-18
ENSG00000150722	PPP1R1C	5.34809	1.15879e-19	5.5061e-18
ENSG00000066697	MSANTD3	1.44579	1.22902e-19	5.8204e-18
ENSG00000129595	EPB41L4A	2.71716	1.22776e-19	5.8204e-18
ENSG00000185483	ROR1	3.44399	1.30352e-19	6.16304e-18
ENSG00000180340	FZD2	-2.94668	1.38886e-19	6.53529e-18
ENSG00000182759	MAFA	-5.01906	1.38912e-19	6.53529e-18
ENSG00000157693	C9orf91	3.926	1.39366e-19	6.54585e-18
ENSG00000067082	KLF6	2.31416	1.39959e-19	6.56291e-18
ENSG00000171720	HDAC3	-1.50105	1.43941e-19	6.73854e-18
ENSG00000179299	NSUN7	5.58664	1.45778e-19	6.81337e-18
ENSG00000248487	ABHD14A	-2.82813	1.504e-19	7.01792e-18
ENSG00000129625	REEP5	-1.55074	1.5846e-19	7.38197e-18
ENSG00000043514	TRIT1	-2.01642	1.63387e-19	7.58671e-18
ENSG00000154265	ABCA5	1.44045	1.63655e-19	7.58684e-18
ENSG00000143494	VASH2	3.54414	1.87977e-19	8.6862e-18
ENSG00000048740	CELF2	2.00426	1.98039e-19	9.12161e-18
ENSG00000173334	TRIB1	1.61605	1.97897e-19	9.12161e-18
ENSG00000183742	MACC1	3.19313	2.02479e-19	9.31112e-18
ENSG00000182054	IDH2	-2.07002	2.07032e-19	9.50516e-18
ENSG00000100403	ZC3H7B	2.0319	2.11145e-19	9.67843e-18
ENSG00000173208	ABCD2	3.30776	2.18274e-19	9.9892e-18
ENSG00000185686	PRAME	5.37438	2.22463e-19	1.01646e-17
ENSG00000130294	KIF1A	6.53838	2.26407e-19	1.03283e-17
ENSG00000065809	FAM107B	2.85008	2.30609e-19	1.05032e-17
ENSG00000176485	PLA2G16	3.27594	2.4171e-19	1.09913e-17
ENSG00000135148	TRAFD1	2.6784	2.47784e-19	1.12317e-17
ENSG00000162367	TAL1	-4.51861	2.53773e-19	1.14849e-17
ENSG00000174137	FAM53A	-2.68563	2.57009e-19	1.1613e-17
ENSG00000179593	ALOX15B	5.28102	2.58034e-19	1.16409e-17
ENSG00000264058	KRT222	2.01741	2.66367e-19	1.19979e-17
ENSG00000144677	CTDSPL	-3.48813	2.79199e-19	1.2556e-17
ENSG00000175970	UNC119B	-1.66814	3.10054e-19	1.3885e-17
ENSG00000101222	SPEF1	-6.10311	3.15186e-19	1.4066e-17
ENSG00000205744	DENND1C	-2.26412	3.15238e-19	1.4066e-17
ENSG00000177732	SOX12	-2.46119	3.39311e-19	1.51165e-17
ENSG00000003989	SLC7A2	7.23495	3.53576e-19	1.57275e-17
ENSG00000165804	ZNF219	-2.45354	3.75334e-19	1.66694e-17
ENSG00000140416	TPM1	-3.62636	3.84675e-19	1.70577e-17
ENSG00000153885	KCTD15	-3.04503	4.27191e-19	1.89136e-17
ENSG00000123405	NFE2	-2.35525	4.30976e-19	1.90517e-17
ENSG00000158106	RHPN1	-4.66356	4.48908e-19	1.97831e-17
ENSG00000196218	RYR1	-4.39772	4.74962e-19	2.08991e-17
ENSG00000124151	NCOA3	1.84415	4.99176e-19	2.1897e-17
ENSG00000155130	MARCKS	4.2118	5.00529e-19	2.19227e-17
ENSG00000130396	MLLT4	2.73764	5.35499e-19	2.33826e-17
ENSG00000082269	FAM135A	2.39936	5.3969e-19	2.35296e-17
ENSG00000103034	NDRG4	3.82198	5.49893e-19	2.39379e-17
ENSG00000168646	AXIN2	2.5202	5.69589e-19	2.47576e-17
ENSG00000136040	PLXNC1	4.92413	5.93611e-19	2.57625e-17
ENSG00000186815	TPCN1	-3.00041	6.0787e-19	2.63014e-17
ENSG00000249242	TMEM150C	2.52569	6.06985e-19	2.63014e-17
ENSG00000116852	KIF21B	1.87312	6.25028e-19	2.70029e-17
ENSG00000105662	CRTC1	-1.54425	6.37829e-19	2.75143e-17
ENSG00000104320	NBN	2.52322	7.02497e-19	3.02127e-17
ENSG00000198585	NUDT16	-2.80623	7.06319e-19	3.03314e-17
ENSG00000104432	IL7	3.24215	7.35722e-19	3.15466e-17
ENSG00000136244	IL6	7.23813	7.63861e-19	3.26551e-17
ENSG00000181790	BAI1	4.10454	7.88454e-19	3.3656e-17
ENSG00000092094	OSGEP	-1.72258	8.27824e-19	3.52312e-17
ENSG00000165171	WBSCR27	-6.29432	8.33656e-19	3.54267e-17
ENSG00000110660	SLC35F2	2.55997	8.5535e-19	3.62946e-17
ENSG00000177311	ZBTB38	2.73687	8.79543e-19	3.72657e-17
ENSG00000179057	IGSF22	-3.70665	9.13886e-19	3.86635e-17
ENSG00000184178	SCFD2	-2.55804	1.0116e-18	4.27237e-17
ENSG00000163154	TNFAIP8L2	-2.81667	1.04831e-18	4.41541e-17
ENSG00000139266	MARCH9	2.28581	1.11534e-18	4.67707e-17
ENSG00000184428	TOP1MT	-2.88206	1.13738e-18	4.7625e-17
ENSG00000179456	ZBTB18	1.46082	1.18246e-18	4.944e-17
ENSG00000123739	PLA2G12A	-2.04986	1.18818e-18	4.96067e-17
ENSG00000188305	C19orf35	-2.93562	1.23046e-18	5.1222e-17
ENSG00000089820	ARHGAP4	-2.6832	1.25362e-18	5.21101e-17
ENSG00000164761	TNFRSF11B	6.90079	1.44433e-18	5.97763e-17
ENSG00000162073	PAQR4	-2.23269	1.49193e-18	6.16569e-17
ENSG00000130881	LRP3	-3.2851	1.52388e-18	6.28867e-17
ENSG00000170791	CHCHD7	-2.18891	1.61727e-18	6.6644e-17
ENSG00000124491	F13A1	-6.80135	1.73929e-18	7.13632e-17
ENSG00000113504	SLC12A7	-2.02197	1.80731e-18	7.39419e-17
ENSG00000073849	ST6GAL1	-2.19634	1.92293e-18	7.85595e-17
ENSG00000153162	BMP6	5.90421	1.96832e-18	8.0299e-17
ENSG00000159348	CYB5R1	-2.63448	1.98957e-18	8.105e-17
ENSG00000069849	ATP1B3	2.01622	2.01983e-18	8.21658e-17
ENSG00000166435	XRRA1	1.82805	2.14355e-18	8.70744e-17
ENSG00000106976	DNM1	-4.31991	2.49863e-18	1.01354e-16
ENSG00000138796	HADH	-2.34447	2.50221e-18	1.01355e-16
ENSG00000174799	CEP135	3.21611	2.66411e-18	1.07456e-16
ENSG00000167996	FTH1	2.16094	2.74182e-18	1.10435e-16
ENSG00000124920	MYRF	-2.72495	2.80615e-18	1.12866e-16
ENSG00000105516	DBP	-2.6718	2.88867e-18	1.16022e-16
ENSG00000198355	PIM3	1.89146	3.31165e-18	1.32824e-16
ENSG00000138074	SLC5A6	2.83595	3.36913e-18	1.3494e-16
ENSG00000134321	RSAD2	5.47597	3.43123e-18	1.37235e-16
ENSG00000162733	DDR2	2.7441	3.47191e-18	1.38668e-16
ENSG00000137225	CAPN11	-3.0783	3.51616e-18	1.40239e-16
ENSG00000170153	RNF150	3.19322	3.57701e-18	1.42467e-16
ENSG00000148358	GPR107	1.51454	3.6137e-18	1.43728e-16
ENSG00000158717	RNF166	-2.86356	3.66893e-18	1.45721e-16
ENSG00000123612	ACVR1C	4.21859	3.73466e-18	1.48126e-16
ENSG00000220008	LINGO3	-2.26727	3.91873e-18	1.54996e-16
ENSG00000116857	TMEM9	-2.6018	3.9616e-18	1.56475e-16
ENSG00000140853	NLRC5	2.56601	4.0401e-18	1.59355e-16
ENSG00000102024	PLS3	3.67178	4.10861e-18	1.61834e-16
ENSG00000011028	MRC2	-3.10808	4.32757e-18	1.70224e-16
ENSG00000109089	CDR2L	-5.05165	4.3398e-18	1.7047e-16
ENSG00000118194	TNNT2	6.76473	4.5254e-18	1.77516e-16
ENSG00000188312	CENPP	-2.36101	4.58079e-18	1.79443e-16
ENSG00000133800	LYVE1	9.15463	4.65158e-18	1.81966e-16
ENSG00000151117	TMEM86A	-3.16146	4.67866e-18	1.82775e-16
ENSG00000142669	SH3BGRL3	-2.4222	4.69803e-18	1.83281e-16
ENSG00000186827	TNFRSF4	3.72092	4.77877e-18	1.86176e-16
ENSG00000136888	ATP6V1G1	1.40755	4.91092e-18	1.91064e-16
ENSG00000140263	SORD	-2.52488	4.94496e-18	1.92127e-16
ENSG00000152484	USP12	2.31915	5.18611e-18	2.01223e-16
ENSG00000070087	PFN2	3.13233	5.22692e-18	2.02531e-16
ENSG00000109079	TNFAIP1	1.9377	5.30537e-18	2.05292e-16
ENSG00000181634	TNFSF15	4.89292	5.32189e-18	2.05652e-16
ENSG00000182511	FES	-3.73448	5.41697e-18	2.08762e-16
ENSG00000103152	MPG	-1.70603	5.53057e-18	2.12696e-16
ENSG00000158887	MPZ	-2.48825	5.53395e-18	2.12696e-16
ENSG00000136603	SKIL	1.87976	5.5879e-18	2.1447e-16
ENSG00000169220	RGS14	-4.28033	5.59513e-18	2.1447e-16
ENSG00000137563	GGH	2.73217	5.84388e-18	2.23625e-16
ENSG00000103490	PYCARD	-4.13714	6.81737e-18	2.60272e-16
ENSG00000111863	ADTRP	4.22049	6.88331e-18	2.62439e-16
ENSG00000106683	LIMK1	-2.27751	7.03825e-18	2.67988e-16
ENSG00000100867	DHRS2	-5.2294	7.06693e-18	2.68722e-16
ENSG00000197471	SPN	-2.82189	7.14158e-18	2.712e-16
ENSG00000140854	KATNB1	-1.14383	7.20014e-18	2.7306e-16
ENSG00000168297	PXK	-2.63788	7.48643e-18	2.83541e-16
ENSG00000164086	DUSP7	-2.68103	7.74985e-18	2.92741e-16
ENSG00000137449	CPEB2	2.47154	8.15354e-18	3.07583e-16
ENSG00000164172	MOCS2	-1.93048	8.38851e-18	3.1603e-16
ENSG00000188549	C15orf52	-3.127	8.60734e-18	3.23847e-16
ENSG00000120063	GNA13	2.21928	8.69695e-18	3.26397e-16
ENSG00000173848	NET1	2.55465	8.69799e-18	3.26397e-16
ENSG00000146281	PM20D2	2.72007	9.69493e-18	3.62855e-16
ENSG00000165801	ARHGEF40	-3.06231	9.94076e-18	3.71568e-16
ENSG00000180953	ST20	3.35158	1.04628e-17	3.90571e-16
ENSG00000166793	YPEL4	-3.09649	1.06137e-17	3.95685e-16
ENSG00000118242	MREG	2.77422	1.07293e-17	3.99475e-16
ENSG00000009790	TRAF3IP3	1.55777	1.07804e-17	4.00855e-16
ENSG00000181274	FRAT2	-2.19428	1.10224e-17	4.09319e-16
ENSG00000120913	PDLIM2	-3.55168	1.12704e-17	4.17985e-16
ENSG00000148204	CRB2	-4.20607	1.14243e-17	4.23142e-16
ENSG00000094975	SUCO	2.04704	1.19617e-17	4.42473e-16
ENSG00000145194	ECE2	-2.40895	1.25083e-17	4.62094e-16
ENSG00000131089	ARHGEF9	-1.83632	1.25687e-17	4.63727e-16
ENSG00000111275	ALDH2	1.93259	1.27626e-17	4.70273e-16
ENSG00000105948	TTC26	2.25351	1.28782e-17	4.73921e-16
ENSG00000111371	SLC38A1	3.38809	1.30507e-17	4.7965e-16
ENSG00000164294	GPX8	-3.07795	1.31576e-17	4.82959e-16
ENSG00000242574	HLA-DMB	-3.76939	1.32716e-17	4.86516e-16
ENSG00000085721	RRN3	2.20107	1.36799e-17	5.00841e-16
ENSG00000072864	NDE1	2.53015	1.42293e-17	5.19623e-16
ENSG00000115956	PLEK	1.94231	1.51899e-17	5.53994e-16
ENSG00000124762	CDKN1A	2.02785	1.58329e-17	5.76709e-16
ENSG00000159239	C2orf81	-2.17097	1.68267e-17	6.12128e-16
ENSG00000099968	BCL2L13	1.43989	1.69505e-17	6.15846e-16
ENSG00000108960	MMD	1.8914	1.7202e-17	6.24189e-16
ENSG00000117519	CNN3	3.65356	1.75445e-17	6.35466e-16
ENSG00000163462	TRIM46	2.39962	1.75573e-17	6.35466e-16
ENSG00000189337	KAZN	3.21095	1.82896e-17	6.61136e-16
ENSG00000103260	METRN	-2.76293	1.85468e-17	6.69586e-16
ENSG00000118418	HMGN3	1.7224	1.98701e-17	7.16453e-16
ENSG00000140876	NUDT7	-2.49282	1.99497e-17	7.18417e-16
ENSG00000165475	CRYL1	-2.39346	2.03226e-17	7.30924e-16
ENSG00000122122	SASH3	-2.59103	2.03788e-17	7.32022e-16
ENSG00000170293	CMTM8	-2.65146	2.04065e-17	7.32095e-16
ENSG00000169683	LRRC45	-2.43257	2.15575e-17	7.71452e-16
ENSG00000121481	RNF2	1.88641	2.16738e-17	7.7464e-16
ENSG00000197329	PELI1	2.57481	2.18806e-17	7.81057e-16
ENSG00000205436	EXOC3L4	4.69755	2.31312e-17	8.22613e-16
ENSG00000104915	STX10	-2.36311	2.36537e-17	8.39104e-16
ENSG00000088766	CRLS1	-1.48708	2.39949e-17	8.50151e-16
ENSG00000165272	AQP3	-4.64661	2.40422e-17	8.50774e-16
ENSG00000168476	REEP4	-2.06062	2.45829e-17	8.68829e-16
ENSG00000182326	C1S	3.29371	2.47741e-17	8.74504e-16
ENSG00000034053	APBA2	2.01427	2.51058e-17	8.85118e-16
ENSG00000205208	C4orf46	2.37627	2.53874e-17	8.92842e-16
ENSG00000020633	RUNX3	1.94792	2.74038e-17	9.6021e-16
ENSG00000144724	PTPRG	3.19564	2.81926e-17	9.8543e-16
ENSG00000187210	GCNT1	-3.04973	2.81837e-17	9.8543e-16
ENSG00000196405	EVL	-3.72976	2.95023e-17	1.02744e-15
ENSG00000186564	FOXD2	-2.25217	2.99221e-17	1.04079e-15
ENSG00000171811	TTC40	4.49822	3.00957e-17	1.04555e-15
ENSG00000168884	TNIP2	1.61138	3.14672e-17	1.09187e-15
ENSG00000154153	FAM134B	4.06433	3.20578e-17	1.11101e-15
ENSG00000168453	HR	-5.26812	3.33955e-17	1.15597e-15
ENSG00000072274	TFRC	4.38162	3.39871e-17	1.17503e-15
ENSG00000155657	TTN	2.69075	3.41002e-17	1.17751e-15
ENSG00000155906	RMND1	-1.57838	3.46358e-17	1.19456e-15
ENSG00000165935	SMCO2	2.42442	3.74005e-17	1.2868e-15
ENSG00000167550	RHEBL1	3.61275	3.7361e-17	1.2868e-15
ENSG00000122862	SRGN	2.74663	3.78525e-17	1.30079e-15
ENSG00000166428	PLD4	-3.75362	3.83451e-17	1.31613e-15
ENSG00000147883	CDKN2B	4.11882	3.91701e-17	1.34122e-15
ENSG00000129673	AANAT	5.5463	3.94034e-17	1.34759e-15
ENSG00000205021	CCL3L1	5.08676	4.04188e-17	1.38067e-15
ENSG00000068097	HEATR6	1.49756	4.11802e-17	1.40332e-15
ENSG00000181026	AEN	2.04926	4.23758e-17	1.44234e-15
ENSG00000172967	XKR3	-3.84684	4.31123e-17	1.46566e-15
ENSG00000176834	VSIG10	-2.09109	4.57081e-17	1.55022e-15
ENSG00000125910	S1PR4	-2.40895	4.78549e-17	1.62111e-15
ENSG00000187796	CARD9	-3.57763	4.80696e-17	1.62645e-15
ENSG00000106330	MOSPD3	-1.969	4.91906e-17	1.66241e-15
ENSG00000196872	KIAA1211L	-4.80974	4.94526e-17	1.66929e-15
ENSG00000152766	ANKRD22	4.28124	4.98149e-17	1.67953e-15
ENSG00000062194	GPBP1	1.45412	5.15837e-17	1.73507e-15
ENSG00000160445	ZER1	2.40628	5.20002e-17	1.74702e-15
ENSG00000122687	FTSJ2	-1.47108	5.30885e-17	1.78149e-15
ENSG00000213190	MLLT11	2.47376	5.34062e-17	1.79005e-15
ENSG00000184640	SEPT9	-1.82049	5.40718e-17	1.81023e-15
ENSG00000049239	H6PD	1.97997	5.92553e-17	1.97913e-15
ENSG00000122547	EEPD1	-3.67161	5.92551e-17	1.97913e-15
ENSG00000099889	ARVCF	-2.31897	6.16825e-17	2.05779e-15
ENSG00000185950	IRS2	2.06311	6.24746e-17	2.08178e-15
ENSG00000136048	DRAM1	2.92855	6.28309e-17	2.09122e-15
ENSG00000205476	CCDC85C	2.2262	6.32509e-17	2.10274e-15
ENSG00000108773	KAT2A	-2.15104	6.53349e-17	2.16698e-15
ENSG00000101888	NXT2	2.2033	6.55001e-17	2.16994e-15
ENSG00000188243	COMMD6	-2.23794	6.6683e-17	2.20657e-15
ENSG00000172057	ORMDL3	1.9414	6.74278e-17	2.22863e-15
ENSG00000164976	KIAA1161	-4.15391	6.86058e-17	2.26494e-15
ENSG00000174574	AKIRIN1	1.44335	7.01865e-17	2.31445e-15
ENSG00000120337	TNFSF18	4.28938	7.05332e-17	2.3232e-15
ENSG00000138670	RASGEF1B	3.07088	7.07394e-17	2.32731e-15
ENSG00000080371	RAB21	1.49483	8.75254e-17	2.86965e-15
ENSG00000124006	OBSL1	-2.30198	8.9102e-17	2.91799e-15
ENSG00000105173	CCNE1	-2.1	9.02379e-17	2.94843e-15
ENSG00000134755	DSC2	1.94683	9.41802e-17	3.07021e-15
ENSG00000167566	NCKAP5L	-2.41695	9.4105e-17	3.07021e-15
ENSG00000178462	TUBAL3	5.95636	9.71397e-17	3.16308e-15
ENSG00000052802	MSMO1	1.69872	9.82757e-17	3.19642e-15
ENSG00000156787	TBC1D31	-1.6595	9.84636e-17	3.19889e-15
ENSG00000122035	RASL11A	3.59852	1.00107e-16	3.24858e-15
ENSG00000138190	EXOC6	-1.79221	1.01129e-16	3.27803e-15
ENSG00000100823	APEX1	-1.75828	1.02588e-16	3.32154e-15
ENSG00000185000	DGAT1	-1.66492	1.10212e-16	3.56437e-15
ENSG00000130479	MAP1S	-2.08759	1.17239e-16	3.78733e-15
ENSG00000166448	TMEM130	-4.74909	1.26329e-16	4.07635e-15
ENSG00000214160	ALG3	-1.73626	1.31597e-16	4.24156e-15
ENSG00000133392	MYH11	2.8328	1.35177e-16	4.35203e-15
ENSG00000156671	SAMD8	1.89267	1.40377e-16	4.51435e-15
ENSG00000143643	TTC13	-3.01289	1.44089e-16	4.62851e-15
ENSG00000077782	FGFR1	-3.07709	1.47455e-16	4.73133e-15
ENSG00000267855	NDUFA7	-1.25618	1.48185e-16	4.74942e-15
ENSG00000136717	BIN1	-2.57959	1.50727e-16	4.82546e-15
ENSG00000145555	MYO10	2.95459	1.52457e-16	4.87537e-15
ENSG00000171724	VAT1L	4.41892	1.58603e-16	5.06624e-15
ENSG00000204388	HSPA1B	2.66839	1.59528e-16	5.09009e-15
ENSG00000150764	DIXDC1	6.22379	1.60066e-16	5.10158e-15
ENSG00000108292	MLLT6	1.41621	1.64247e-16	5.22317e-15
ENSG00000111348	ARHGDIB	-3.36743	1.65241e-16	5.24892e-15
ENSG00000161513	FDXR	-2.51487	1.66957e-16	5.29753e-15
ENSG00000141337	ARSG	-1.26785	1.76601e-16	5.58494e-15
ENSG00000188313	PLSCR1	3.45004	1.81459e-16	5.72587e-15
ENSG00000117594	HSD11B1	2.78414	1.82051e-16	5.73557e-15
ENSG00000132639	SNAP25	6.22589	1.84506e-16	5.7973e-15
ENSG00000170917	NUDT6	-2.6235	1.84534e-16	5.7973e-15
ENSG00000204291	COL15A1	2.3264	1.85639e-16	5.82559e-15
ENSG00000184007	PTP4A2	1.17574	1.87184e-16	5.86764e-15
ENSG00000167272	POP5	-1.87145	1.91689e-16	6.00226e-15
ENSG00000121807	CCR2	-3.12862	2.02269e-16	6.32663e-15
ENSG00000183386	FHL3	-2.19055	2.05634e-16	6.42279e-15
ENSG00000187630	DHRS4L2	-2.96377	2.05794e-16	6.42279e-15
ENSG00000141655	TNFRSF11A	2.11362	2.06424e-16	6.43542e-15
ENSG00000135074	ADAM19	2.29697	2.08684e-16	6.49878e-15
ENSG00000122986	HVCN1	-2.09822	2.1003e-16	6.53358e-15
ENSG00000115685	PPP1R7	-1.88314	2.15218e-16	6.68768e-15
ENSG00000172292	CERS6	2.55759	2.21926e-16	6.88863e-15
ENSG00000116717	GADD45A	3.16721	2.24341e-16	6.95605e-15
ENSG00000140443	IGF1R	2.50506	2.25078e-16	6.97131e-15
ENSG00000134108	ARL8B	2.15293	2.33393e-16	7.22102e-15
ENSG00000198576	ARC	3.7591	2.34127e-16	7.23588e-15
ENSG00000249437	NAIP	-3.54637	2.3852e-16	7.36368e-15
ENSG00000021762	OSBPL5	-1.83054	2.42202e-16	7.46928e-15
ENSG00000099864	PALM	3.70391	2.43359e-16	7.49687e-15
ENSG00000130487	KLHDC7B	3.05019	2.45198e-16	7.5454e-15
ENSG00000113790	EHHADH	3.00728	2.47458e-16	7.60673e-15
ENSG00000170542	SERPINB9	3.56308	2.54774e-16	7.8232e-15
ENSG00000159640	ACE	-3.92344	2.59196e-16	7.94192e-15
ENSG00000171700	RGS19	-2.29834	2.59645e-16	7.94713e-15
ENSG00000130755	GMFG	-3.25454	2.69422e-16	8.23758e-15
ENSG00000166503	HDGFRP3	1.80465	2.71776e-16	8.30066e-15
ENSG00000164330	EBF1	5.87644	2.78828e-16	8.50693e-15
ENSG00000158747	NBL1	3.49052	2.89888e-16	8.83492e-15
ENSG00000204634	TBC1D8	2.97264	2.91031e-16	8.86031e-15
ENSG00000128578	STRIP2	4.8799	2.93581e-16	8.92842e-15
ENSG00000073008	PVR	2.60573	3.09588e-16	9.40522e-15
ENSG00000125347	IRF1	3.25589	3.16219e-16	9.59646e-15
ENSG00000132394	EEFSEC	-1.93437	3.24576e-16	9.83962e-15
ENSG00000042062	FAM65C	3.11615	3.32436e-16	1.00566e-14
ENSG00000171617	ENC1	-2.96629	3.33958e-16	1.00812e-14
ENSG00000071073	MGAT4A	-2.70227	3.5418e-16	1.06804e-14
ENSG00000196878	LAMB3	3.06937	3.57565e-16	1.07711e-14
ENSG00000196622	RIMBP3	-3.63619	3.72571e-16	1.12113e-14
ENSG00000119608	PROX2	-2.35888	3.73371e-16	1.12235e-14
ENSG00000033011	ALG1	-1.93264	3.83922e-16	1.15286e-14
ENSG00000109667	SLC2A9	-2.26414	3.88823e-16	1.16635e-14
ENSG00000107771	CCSER2	1.85475	4.00104e-16	1.19893e-14
ENSG00000143537	ADAM15	-3.85767	4.09462e-16	1.22568e-14
ENSG00000126822	PLEKHG3	-2.52202	4.17379e-16	1.24807e-14
ENSG00000198771	RCSD1	2.62941	4.32481e-16	1.29053e-14
ENSG00000196636	ACN9	-2.6368	4.35298e-16	1.29758e-14
ENSG00000058804	NDC1	-1.25914	4.43969e-16	1.32067e-14
ENSG00000116774	OLFML3	-5.49188	4.43663e-16	1.32067e-14
ENSG00000151500	THYN1	-1.44031	4.45209e-16	1.32298e-14
ENSG00000173821	RNF213	2.14218	4.46355e-16	1.32501e-14
ENSG00000116667	C1orf21	2.05302	4.56069e-16	1.35103e-14
ENSG00000067836	ROGDI	-2.62018	4.5678e-16	1.35174e-14
ENSG00000228672	PROB1	2.55743	4.58172e-16	1.35445e-14
ENSG00000099992	TBC1D10A	1.52314	4.70574e-16	1.38968e-14
ENSG00000115919	KYNU	2.60995	4.75866e-16	1.40386e-14
ENSG00000105329	TGFB1	-2.30413	4.80153e-16	1.41358e-14
ENSG00000124145	SDC4	1.94316	4.8013e-16	1.41358e-14
ENSG00000106665	CLIP2	-1.33278	4.84352e-16	1.42447e-14
ENSG00000159202	UBE2Z	1.40579	4.85175e-16	1.42543e-14
ENSG00000170802	FOXN2	2.06522	4.95619e-16	1.45461e-14
ENSG00000147130	ZMYM3	-2.08528	4.99254e-16	1.46378e-14
ENSG00000106526	ACTR3C	2.65661	5.05896e-16	1.48173e-14
ENSG00000176903	PNMA1	2.50799	5.16594e-16	1.51151e-14
ENSG00000173442	EHBP1L1	1.44786	5.21529e-16	1.52439e-14
ENSG00000126882	FAM78A	-2.64852	5.22844e-16	1.52667e-14
ENSG00000179639	FCER1A	-3.9338	5.47449e-16	1.59688e-14
ENSG00000122203	KIAA1191	1.62431	5.57409e-16	1.62428e-14
ENSG00000175104	TRAF6	1.85764	5.59473e-16	1.62863e-14
ENSG00000138823	MTTP	4.41932	5.60799e-16	1.63083e-14
ENSG00000135373	EHF	3.00107	5.7633e-16	1.67429e-14
ENSG00000136052	SLC41A2	2.4097	5.84719e-16	1.69693e-14
ENSG00000227051	C14orf132	-2.46424	5.89179e-16	1.70814e-14
ENSG00000151014	CCRN4L	1.73142	5.91932e-16	1.71438e-14
ENSG00000135480	KRT7	4.84255	6.03029e-16	1.74475e-14
ENSG00000162433	AK4	2.33876	6.0773e-16	1.75657e-14
ENSG00000051128	HOMER3	-1.73466	6.33868e-16	1.83027e-14
ENSG00000227191	TRGC2	4.50568	6.42099e-16	1.85216e-14
ENSG00000197782	ZNF780A	-2.13635	6.48517e-16	1.8669e-14
ENSG00000240038	AMY2B	-1.80027	6.79741e-16	1.95482e-14
ENSG00000169194	IL13	4.23832	6.91924e-16	1.98773e-14
ENSG00000204257	HLA-DMA	-2.59932	6.92578e-16	1.98773e-14
ENSG00000137857	DUOX1	-2.68586	6.96744e-16	1.99768e-14
ENSG00000188505	NCCRP1	3.95473	7.05205e-16	2.01991e-14
ENSG00000166147	FBN1	3.15137	7.22681e-16	2.06789e-14
ENSG00000176884	GRIN1	2.96185	7.39928e-16	2.11513e-14
ENSG00000161921	CXCL16	2.21985	7.49092e-16	2.13918e-14
ENSG00000109881	CCDC34	-2.62859	7.5278e-16	2.14757e-14
ENSG00000168556	ING2	-1.98456	7.83928e-16	2.23358e-14
ENSG00000204472	AIF1	-3.71413	7.86251e-16	2.23635e-14
ENSG00000120262	CCDC170	-3.57531	7.98034e-16	2.26761e-14
ENSG00000205403	CFI	-3.11792	8.21478e-16	2.3319e-14
ENSG00000145832	SLC25A48	-4.23519	8.28208e-16	2.34867e-14
ENSG00000152642	GPD1L	-4.51189	8.79557e-16	2.49182e-14
ENSG00000132000	PODNL1	-2.94177	8.92425e-16	2.52577e-14
ENSG00000167261	DPEP2	-2.85263	9.23949e-16	2.60981e-14
ENSG00000128989	ARPP19	2.02772	9.25694e-16	2.61216e-14
ENSG00000126759	CFP	2.82135	9.52827e-16	2.68607e-14
ENSG00000130956	HABP4	1.51219	9.6852e-16	2.72762e-14
ENSG00000123096	SSPN	4.91741	1.00174e-15	2.81839e-14
ENSG00000188707	ZBED6CL	3.72161	1.00577e-15	2.82694e-14
ENSG00000107902	LHPP	-1.78447	1.01867e-15	2.8604e-14
ENSG00000088543	C3orf18	1.69514	1.04001e-15	2.91173e-14
ENSG00000165138	ANKS6	-1.86396	1.1804e-15	3.29831e-14
ENSG00000123179	EBPL	-1.71744	1.19779e-15	3.34362e-14
ENSG00000198796	ALPK2	4.29948	1.20939e-15	3.37271e-14
ENSG00000142494	SLC47A1	-2.35579	1.25076e-15	3.48128e-14
ENSG00000177685	EFCAB4A	-3.6272	1.25727e-15	3.49599e-14
ENSG00000036448	MYOM2	-3.75083	1.26585e-15	3.51302e-14
ENSG00000204396	VWA7	3.0315	1.26497e-15	3.51302e-14
ENSG00000163900	TMEM41A	1.76414	1.31105e-15	3.63493e-14
ENSG00000006025	OSBPL7	-1.90483	1.33313e-15	3.69256e-14
ENSG00000127561	SYNGR3	3.25556	1.3387e-15	3.70439e-14
ENSG00000166920	C15orf48	5.05897	1.34695e-15	3.72e-14
ENSG00000107372	ZFAND5	1.96335	1.35564e-15	3.73875e-14
ENSG00000184226	PCDH9	5.39135	1.35636e-15	3.73875e-14
ENSG00000151651	ADAM8	2.19432	1.36271e-15	3.75264e-14
ENSG00000067057	PFKP	-1.31095	1.37715e-15	3.78874e-14
ENSG00000213085	CCDC19	2.84412	1.42606e-15	3.91953e-14
ENSG00000112096	SOD2	4.42269	1.44363e-15	3.96401e-14
ENSG00000181444	ZNF467	-2.90559	1.45491e-15	3.99114e-14
ENSG00000105520	DKFZP761J1410	-1.96164	1.49192e-15	4.08874e-14
ENSG00000153207	AHCTF1	1.86593	1.51676e-15	4.15285e-14
ENSG00000105993	DNAJB6	1.56007	1.54967e-15	4.23889e-14
ENSG00000225940	AC022431.2	4.93443	1.562e-15	4.26851e-14
ENSG00000184304	PRKD1	4.63037	1.6189e-15	4.41557e-14
ENSG00000141068	KSR1	2.69815	1.6253e-15	4.42878e-14
ENSG00000174500	GCSAM	6.08412	1.63077e-15	4.43946e-14
ENSG00000125962	ARMCX5	-1.85258	1.67854e-15	4.56515e-14
ENSG00000183496	MEX3B	-1.70112	1.68384e-15	4.5752e-14
ENSG00000115963	RND3	3.94973	1.79918e-15	4.87468e-14
ENSG00000164904	ALDH7A1	-3.00565	1.80739e-15	4.89228e-14
ENSG00000165304	MELK	2.3561	1.85017e-15	5.00335e-14
ENSG00000142046	TMEM91	-3.45466	1.87256e-15	5.05911e-14
ENSG00000187479	C11orf96	5.64489	1.90545e-15	5.1431e-14
ENSG00000143110	C1orf162	-3.94942	2.00624e-15	5.41002e-14
ENSG00000163870	TPRA1	1.46029	2.01583e-15	5.43075e-14
ENSG00000184678	HIST2H2BE	2.35327	2.04048e-15	5.492e-14
ENSG00000126460	PRRG2	1.76918	2.07872e-15	5.58964e-14
ENSG00000241978	AKAP2	5.0827	2.20643e-15	5.92189e-14
ENSG00000116128	BCL9	-2.41163	2.2197e-15	5.95192e-14
ENSG00000177830	CHID1	-2.72277	2.25279e-15	6.03499e-14
ENSG00000095970	TREM2	-4.49803	2.28284e-15	6.10976e-14
ENSG00000132849	INADL	2.7628	2.29731e-15	6.14272e-14
ENSG00000186891	TNFRSF18	3.59923	2.40237e-15	6.41164e-14
ENSG00000148143	ZNF462	3.39717	2.4179e-15	6.44105e-14
ENSG00000180767	CHST13	-5.15971	2.41615e-15	6.44105e-14
ENSG00000131378	RFTN1	2.46413	2.46871e-15	6.57026e-14
ENSG00000186001	LRCH3	1.49762	2.59705e-15	6.89255e-14
ENSG00000119457	SLC46A2	-4.80907	2.61134e-15	6.91951e-14
ENSG00000197956	S100A6	-2.55798	2.61205e-15	6.91951e-14
ENSG00000161944	ASGR2	-5.68924	2.6274e-15	6.95373e-14
ENSG00000162139	NEU3	2.55567	2.91079e-15	7.69662e-14
ENSG00000090661	CERS4	2.17666	2.94742e-15	7.78224e-14
ENSG00000204371	EHMT2	-1.5193	2.94862e-15	7.78224e-14
ENSG00000137880	GCHFR	-2.69608	3.03188e-15	7.97985e-14
ENSG00000142459	EVI5L	-2.02067	3.02954e-15	7.97985e-14
ENSG00000158828	PINK1	-1.34552	3.05933e-15	8.04468e-14
ENSG00000161267	BDH1	-2.104	3.09547e-15	8.13223e-14
ENSG00000197043	ANXA6	2.37941	3.14252e-15	8.24826e-14
ENSG00000026297	RNASET2	-3.51375	3.301e-15	8.65627e-14
ENSG00000235162	C12orf75	2.64349	3.31484e-15	8.68459e-14
ENSG00000105976	MET	6.22358	3.4035e-15	8.90869e-14
ENSG00000187840	EIF4EBP1	-2.95768	3.57492e-15	9.34025e-14
ENSG00000220201	ZGLP1	-3.26975	3.67293e-15	9.57881e-14
ENSG00000090447	TFAP4	-1.61775	3.68046e-15	9.58969e-14
ENSG00000123240	OPTN	3.22052	3.71003e-15	9.65792e-14
ENSG00000245848	CEBPA	-2.78864	3.84613e-15	9.994e-14
ENSG00000110013	SIAE	-2.09272	3.91728e-15	1.01696e-13
ENSG00000121848	RNF115	1.56976	3.93033e-15	1.01942e-13
ENSG00000177599	ZNF491	-3.19327	3.97179e-15	1.02831e-13
ENSG00000187944	C2orf66	5.92541	3.96896e-15	1.02831e-13
ENSG00000160050	CCDC28B	2.86699	4.00411e-15	1.03574e-13
ENSG00000120280	CXorf21	-2.57149	4.03332e-15	1.04141e-13
ENSG00000212719	C17orf51	-1.52206	4.13449e-15	1.06656e-13
ENSG00000197536	C5orf56	2.65914	4.15428e-15	1.0707e-13
ENSG00000258472	RP11-192H23.4	-2.0651	4.1941e-15	1.07999e-13
ENSG00000091136	LAMB1	2.61281	4.26249e-15	1.09661e-13
ENSG00000159714	ZDHHC1	-2.60983	4.30186e-15	1.10574e-13
ENSG00000133454	MYO18B	2.38028	4.58617e-15	1.17776e-13
ENSG00000196502	SULT1A1	-2.18479	4.61169e-15	1.18325e-13
ENSG00000069998	CECR5	-1.3683	4.95712e-15	1.27074e-13
ENSG00000140931	CMTM3	-2.45651	5.00316e-15	1.28139e-13
ENSG00000110944	IL23A	5.63079	5.10616e-15	1.3066e-13
ENSG00000136238	RAC1	1.23218	5.16713e-15	1.32102e-13
ENSG00000105717	PBX4	3.60994	5.26953e-15	1.34599e-13
ENSG00000106733	NMRK1	2.03631	5.35246e-15	1.36595e-13
ENSG00000185811	IKZF1	2.00377	5.43568e-15	1.38595e-13
ENSG00000003436	TFPI	4.31498	5.60258e-15	1.42596e-13
ENSG00000076864	RAP1GAP	-2.92954	5.81538e-15	1.47749e-13
ENSG00000184988	TMEM106A	-1.40585	5.90581e-15	1.4978e-13
ENSG00000178585	CTNNBIP1	-2.47556	5.93556e-15	1.50401e-13
ENSG00000168918	INPP5D	-2.58787	6.11385e-15	1.54781e-13
ENSG00000163485	ADORA1	-4.90425	6.14314e-15	1.55385e-13
ENSG00000115419	GLS	2.09931	6.17178e-15	1.55971e-13
ENSG00000163113	OTUD7B	2.08087	6.46053e-15	1.63124e-13
ENSG00000143369	ECM1	-2.10582	6.50593e-15	1.64125e-13
ENSG00000180530	NRIP1	2.42486	6.62939e-15	1.67092e-13
ENSG00000143375	CGN	5.83309	6.70341e-15	1.68809e-13
ENSG00000112977	DAP	-1.77654	6.74056e-15	1.69595e-13
ENSG00000135363	LMO2	-3.78864	6.81378e-15	1.71286e-13
ENSG00000108389	MTMR4	2.00877	6.83268e-15	1.7161e-13
ENSG00000004139	SARM1	1.5797	7.05131e-15	1.76946e-13
ENSG00000105835	NAMPT	3.55486	7.07118e-15	1.77289e-13
ENSG00000086289	EPDR1	3.51925	7.09734e-15	1.77788e-13
ENSG00000163214	DHX57	-1.5398	7.44824e-15	1.86415e-13
ENSG00000128016	ZFP36	1.7509	7.47599e-15	1.86945e-13
ENSG00000158716	DUSP23	-3.27523	7.56935e-15	1.89098e-13
ENSG00000198598	MMP17	-2.50861	7.5753e-15	1.89098e-13
ENSG00000164885	CDK5	-2.18085	7.6379e-15	1.90494e-13
ENSG00000008853	RHOBTB2	-1.6212	7.71342e-15	1.9221e-13
ENSG00000182851	GPIHBP1	9.00964	7.74834e-15	1.92911e-13
ENSG00000135454	B4GALNT1	5.25974	7.76851e-15	1.93245e-13
ENSG00000138439	FAM117B	-1.55604	7.80148e-15	1.93896e-13
ENSG00000101444	AHCY	-2.0645	8.03273e-15	1.9947e-13
ENSG00000117143	UAP1	1.65529	8.0876e-15	2.00658e-13
ENSG00000145734	BDP1	2.11709	8.31451e-15	2.06109e-13
ENSG00000062822	POLD1	-2.15721	8.48097e-15	2.10053e-13
ENSG00000065320	NTN1	4.06029	8.58377e-15	2.12415e-13
ENSG00000103723	AP3B2	3.34781	8.61398e-15	2.12978e-13
ENSG00000136044	APPL2	-1.51475	9.05473e-15	2.23488e-13
ENSG00000139083	ETV6	1.28702	9.23109e-15	2.27644e-13
ENSG00000117298	ECE1	3.93314	9.38632e-15	2.31273e-13
ENSG00000185070	FLRT2	-2.01043	9.43192e-15	2.32196e-13
ENSG00000154864	PIEZO2	3.43267	9.67696e-15	2.37818e-13
ENSG00000187808	SOWAHD	-4.40389	9.98662e-15	2.45218e-13
ENSG00000151474	FRMD4A	-3.67379	1.01899e-14	2.49993e-13
ENSG00000118513	MYB	1.85417	1.02431e-14	2.51084e-13
ENSG00000008226	DLEC1	-2.3288	1.02583e-14	2.5124e-13
ENSG00000125845	BMP2	4.40744	1.03386e-14	2.52991e-13
ENSG00000177272	KCNA3	4.64997	1.07094e-14	2.61615e-13
ENSG00000182512	GLRX5	-1.24642	1.07374e-14	2.62074e-13
ENSG00000005175	RPAP3	1.31691	1.08859e-14	2.65473e-13
ENSG00000166619	BLCAP	-1.28371	1.09031e-14	2.65665e-13
ENSG00000126264	HCST	-2.59977	1.11461e-14	2.71123e-13
ENSG00000198729	PPP1R14C	4.25841	1.14722e-14	2.78818e-13
ENSG00000159063	ALG8	-1.77182	1.21726e-14	2.95088e-13
ENSG00000168421	RHOH	2.8344	1.21879e-14	2.95207e-13
ENSG00000083799	CYLD	1.1768	1.25077e-14	3.02441e-13
ENSG00000160307	S100B	-4.93532	1.25914e-14	3.04206e-13
ENSG00000127084	FGD3	-1.99356	1.26954e-14	3.06461e-13
ENSG00000173218	VANGL1	2.18204	1.27944e-14	3.0859e-13
ENSG00000198018	ENTPD7	2.66959	1.32788e-14	3.19462e-13
ENSG00000089327	FXYD5	-2.37405	1.34015e-14	3.22143e-13
ENSG00000196352	CD55	1.96726	1.35322e-14	3.25013e-13
ENSG00000114654	EFCC1	-3.71194	1.35869e-14	3.26051e-13
ENSG00000163328	GPR155	-2.55134	1.36655e-14	3.27663e-13
ENSG00000107719	PALD1	-5.14927	1.37719e-14	3.29661e-13
ENSG00000175344	CHRNA7	2.69722	1.37616e-14	3.29661e-13
ENSG00000099797	TECR	-1.61091	1.41922e-14	3.39437e-13
ENSG00000140497	SCAMP2	-1.27623	1.42114e-14	3.39611e-13
ENSG00000164484	TMEM200A	3.84719	1.44305e-14	3.44557e-13
ENSG00000166171	DPCD	-1.96651	1.4544e-14	3.46978e-13
ENSG00000171847	FAM90A1	-3.90351	1.4815e-14	3.52853e-13
ENSG00000100802	C14orf93	-1.87191	1.48441e-14	3.52957e-13
ENSG00000123329	ARHGAP9	-3.00615	1.48425e-14	3.52957e-13
ENSG00000114861	FOXP1	1.89471	1.50383e-14	3.57278e-13
ENSG00000151693	ASAP2	5.37176	1.51145e-14	3.58561e-13
ENSG00000180596	HIST1H2BC	3.35261	1.51174e-14	3.58561e-13
ENSG00000119471	HSDL2	1.45514	1.51784e-14	3.5971e-13
ENSG00000123552	USP45	1.55465	1.55172e-14	3.67129e-13
ENSG00000120693	SMAD9	-2.69832	1.55788e-14	3.6828e-13
ENSG00000119314	PTBP3	1.36019	1.56659e-14	3.70035e-13
ENSG00000158286	RNF207	2.14064	1.58231e-14	3.73176e-13
ENSG00000188343	FAM92A1	-1.49001	1.5825e-14	3.73176e-13
ENSG00000157110	RBPMS	1.74454	1.60782e-14	3.78832e-13
ENSG00000128294	TPST2	-2.18396	1.63806e-14	3.85639e-13
ENSG00000165556	CDX2	2.51161	1.66659e-14	3.92033e-13
ENSG00000085871	MGST2	-3.56463	1.70695e-14	4.01198e-13
ENSG00000127399	LRRC61	3.37497	1.81439e-14	4.25747e-13
ENSG00000090776	EFNB1	-1.7557	1.84485e-14	4.3254e-13
ENSG00000149418	ST14	-2.66867	1.86738e-14	4.37462e-13
ENSG00000171914	TLN2	-3.88668	1.88312e-14	4.4079e-13
ENSG00000184674	GSTT1	-2.15172	1.90608e-14	4.45797e-13
ENSG00000101751	POLI	1.81118	1.92731e-14	4.50394e-13
ENSG00000100558	PLEK2	-1.91712	1.92996e-14	4.50645e-13
ENSG00000198910	L1CAM	4.38585	1.94766e-14	4.54407e-13
ENSG00000172575	RASGRP1	2.42334	1.98373e-14	4.62444e-13
ENSG00000125510	OPRL1	-2.04182	2.02897e-14	4.72605e-13
ENSG00000093167	LRRFIP2	1.13129	2.05542e-14	4.77985e-13
ENSG00000123892	RAB38	-2.09905	2.05452e-14	4.77985e-13
ENSG00000185947	ZNF267	1.88032	2.05726e-14	4.78024e-13
ENSG00000162616	DNAJB4	1.93548	2.10822e-14	4.89069e-13
ENSG00000204389	HSPA1A	2.08679	2.13483e-14	4.94439e-13
ENSG00000134028	ADAMDEC1	5.34433	2.14896e-14	4.97309e-13
ENSG00000141570	CBX8	-2.61666	2.16919e-14	5.01583e-13
ENSG00000144649	FAM198A	-2.71706	2.1807e-14	5.03837e-13
ENSG00000164509	IL31RA	5.96294	2.19192e-14	5.0602e-13
ENSG00000183655	KLHL25	-2.83736	2.20548e-14	5.08329e-13
ENSG00000139668	WDFY2	-1.98746	2.24742e-14	5.17577e-13
ENSG00000135778	NTPCR	-1.50307	2.28393e-14	5.25139e-13
ENSG00000130193	THEM6	-1.84558	2.38789e-14	5.48158e-13
ENSG00000160439	RDH13	-1.23282	2.41274e-14	5.53419e-13
ENSG00000097021	ACOT7	-2.27833	2.41987e-14	5.54164e-13
ENSG00000104903	LYL1	-2.3574	2.43664e-14	5.5711e-13
ENSG00000105655	ISYNA1	-2.47499	2.47512e-14	5.64554e-13
ENSG00000164754	RAD21	1.86075	2.57956e-14	5.87904e-13
ENSG00000054219	LY75	3.98949	2.58479e-14	5.88627e-13
ENSG00000175287	PHYHD1	-3.57584	2.60041e-14	5.91712e-13
ENSG00000120254	MTHFD1L	-2.2306	2.67424e-14	6.08029e-13
ENSG00000130589	HELZ2	2.56693	2.78212e-14	6.32053e-13
ENSG00000116954	RRAGC	1.56774	2.79954e-14	6.35505e-13
ENSG00000196420	S100A5	-5.07935	2.82586e-14	6.40461e-13
ENSG00000118263	KLF7	3.0401	2.84008e-14	6.43173e-13
ENSG00000168658	VWA3B	2.77354	2.85002e-14	6.44913e-13
ENSG00000140280	LYSMD2	2.50016	2.87574e-14	6.50218e-13
ENSG00000156675	RAB11FIP1	2.03028	2.88157e-14	6.5102e-13
ENSG00000136490	LIMD2	-2.11892	2.94042e-14	6.6379e-13
ENSG00000171517	LPAR3	3.7652	2.94539e-14	6.64388e-13
ENSG00000124496	TRERF1	-1.80012	2.96862e-14	6.69099e-13
ENSG00000146828	SLC12A9	-2.27351	3.0583e-14	6.88769e-13
ENSG00000119535	CSF3R	-2.23431	3.16013e-14	7.11142e-13
ENSG00000141505	ASGR1	-3.26699	3.21345e-14	7.22572e-13
ENSG00000143554	SLC27A3	-3.37713	3.22125e-14	7.23754e-13
ENSG00000076555	ACACB	-1.70564	3.41842e-14	7.67452e-13
ENSG00000198825	INPP5F	1.74702	3.56613e-14	7.99984e-13
ENSG00000110104	CCDC86	-2.38024	3.5849e-14	8.03563e-13
ENSG00000125246	CLYBL	-2.37449	3.65508e-14	8.18011e-13
ENSG00000125637	PSD4	-1.16647	3.6725e-14	8.21266e-13
ENSG00000170632	ARMC10	-1.32024	3.69236e-14	8.2506e-13
ENSG00000134222	PSRC1	-2.90777	3.70029e-14	8.26185e-13
ENSG00000173868	PHOSPHO1	-4.46888	3.79059e-14	8.45686e-13
ENSG00000117643	MAN1C1	-4.00411	3.8532e-14	8.58984e-13
ENSG00000147650	LRP12	3.28651	3.93222e-14	8.75915e-13
ENSG00000196371	FUT4	1.72552	4.00546e-14	8.91534e-13
ENSG00000105245	NUMBL	-1.48007	4.03713e-14	8.97883e-13
ENSG00000112182	BACH2	4.17637	4.04252e-14	8.98383e-13
ENSG00000261857	MIA	3.43909	4.05116e-14	8.99603e-13
ENSG00000180509	KCNE1	2.74179	4.13032e-14	9.1647e-13
ENSG00000103569	AQP9	4.73752	4.25084e-14	9.42477e-13
ENSG00000117280	RAB7L1	1.9726	4.27996e-14	9.48199e-13
ENSG00000131650	KREMEN2	-3.38287	4.36785e-14	9.66171e-13
ENSG00000145390	USP53	2.29062	4.36503e-14	9.66171e-13
ENSG00000078589	P2RY10	4.58203	4.4524e-14	9.84111e-13
ENSG00000156709	AIFM1	-1.88628	4.69447e-14	1.03521e-12
ENSG00000108702	CCL1	3.17308	4.72826e-14	1.04186e-12
ENSG00000108439	PNPO	-1.76867	4.74022e-14	1.04369e-12
ENSG00000197442	MAP3K5	-1.41496	4.7663e-14	1.04782e-12
ENSG00000112799	LY86	-4.31646	4.77491e-14	1.04839e-12
ENSG00000168795	ZBTB5	1.52407	4.77627e-14	1.04839e-12
ENSG00000138623	SEMA7A	2.63827	4.80494e-14	1.05388e-12
ENSG00000179454	KLHL28	2.41866	4.82037e-14	1.05564e-12
ENSG00000197121	PGAP1	3.34155	4.81944e-14	1.05564e-12
ENSG00000114541	FRMD4B	-2.64741	4.87746e-14	1.06696e-12
ENSG00000243649	CFB	3.80568	4.87954e-14	1.06696e-12
ENSG00000112561	TFEB	-2.37735	4.88867e-14	1.06814e-12
ENSG00000198848	CES1	2.92358	4.95807e-14	1.08247e-12
ENSG00000102226	USP11	1.28766	5.20055e-14	1.13455e-12
ENSG00000128917	DLL4	3.93753	5.29051e-14	1.15241e-12
ENSG00000167700	MFSD3	-2.96947	5.37403e-14	1.16971e-12
ENSG00000158773	USF1	-1.52726	5.38057e-14	1.17024e-12
ENSG00000010671	BTK	-1.80745	5.41297e-14	1.17639e-12
ENSG00000185022	MAFF	2.40456	5.52778e-14	1.19952e-12
ENSG00000141577	AZI1	-2.26293	5.54745e-14	1.20287e-12
ENSG00000107331	ABCA2	-2.16551	5.5559e-14	1.20379e-12
ENSG00000135063	FAM189A2	-5.39734	5.58728e-14	1.20967e-12
ENSG00000100453	GZMB	3.84208	5.78444e-14	1.25141e-12
ENSG00000175727	MLXIP	-1.46956	5.79498e-14	1.25274e-12
ENSG00000198324	FAM109A	-4.41353	5.94788e-14	1.28482e-12
ENSG00000106351	AGFG2	1.59147	6.02596e-14	1.30071e-12
ENSG00000083642	PDS5B	1.5967	6.04266e-14	1.30332e-12
ENSG00000164088	PPM1M	-1.79716	6.26142e-14	1.34949e-12
ENSG00000173542	MOB1B	1.62921	6.42672e-14	1.38407e-12
ENSG00000065609	SNAP91	4.70947	6.51869e-14	1.40282e-12
ENSG00000254087	LYN	1.71874	6.54907e-14	1.4083e-12
ENSG00000128311	TST	-2.70495	6.57356e-14	1.4125e-12
ENSG00000182134	TDRKH	-1.76757	6.69657e-14	1.43785e-12
ENSG00000248835	AL357673.1	-1.70923	6.80545e-14	1.46013e-12
ENSG00000100664	EIF5	1.30481	6.82537e-14	1.4633e-12
ENSG00000029153	ARNTL2	2.9412	6.89502e-14	1.47713e-12
ENSG00000105429	MEGF8	-1.55716	6.98618e-14	1.49553e-12
ENSG00000136856	SLC2A8	-2.25728	7.07449e-14	1.5133e-12
ENSG00000180573	HIST1H2AC	2.31523	7.17324e-14	1.53328e-12
ENSG00000112139	MDGA1	3.72188	7.18478e-14	1.5346e-12
ENSG00000146950	SHROOM2	-4.4531	7.3522e-14	1.56918e-12
ENSG00000169418	NPR1	-2.896	7.43258e-14	1.58515e-12
ENSG00000120318	ARAP3	-2.88521	7.52665e-14	1.60402e-12
ENSG00000054654	SYNE2	1.75103	7.56219e-14	1.61039e-12
ENSG00000173065	FAM222B	1.53004	7.57819e-14	1.61259e-12
ENSG00000172939	OXSR1	1.4138	7.68966e-14	1.6351e-12
ENSG00000107643	MAPK8	1.99502	7.73237e-14	1.64296e-12
ENSG00000165695	AK8	3.54841	7.78895e-14	1.65375e-12
ENSG00000073711	PPP2R3A	2.78121	8.10174e-14	1.71633e-12
ENSG00000139974	SLC38A6	-2.70899	8.12886e-14	1.7208e-12
ENSG00000127074	RGS13	3.71353	8.22748e-14	1.74039e-12
ENSG00000136631	VPS45	-1.20319	8.26866e-14	1.7478e-12
ENSG00000110917	MLEC	-1.92425	8.48338e-14	1.79186e-12
ENSG00000198331	HYLS1	1.76225	8.50069e-14	1.79419e-12
ENSG00000101890	GUCY2F	5.32806	8.52243e-14	1.79745e-12
ENSG00000168621	GDNF	3.63058	8.88253e-14	1.87202e-12
ENSG00000171574	ZNF584	-1.38039	8.90364e-14	1.87508e-12
ENSG00000152147	GEMIN6	-1.48055	9.12919e-14	1.91975e-12
ENSG00000173372	C1QA	-4.5029	9.1687e-14	1.92381e-12
ENSG00000129277	CCL4	3.0371	9.23631e-14	1.93657e-12
ENSG00000101596	SMCHD1	1.94164	9.31477e-14	1.95159e-12
ENSG00000039068	CDH1	-3.05999	9.35301e-14	1.95817e-12
ENSG00000156042	TTC18	1.60815	9.55179e-14	1.99539e-12
ENSG00000129824	RPS4Y1	-1.76424	9.62424e-14	2.00906e-12
ENSG00000145569	FAM105A	-2.43514	9.93572e-14	2.07105e-12
ENSG00000106077	ABHD11	-2.33446	9.9809e-14	2.07895e-12
ENSG00000065491	TBC1D22B	1.86413	1.00281e-13	2.08727e-12
ENSG00000143190	POU2F1	1.47652	1.02213e-13	2.12593e-12
ENSG00000213937	CLDN9	-4.35394	1.03758e-13	2.15492e-12
ENSG00000137764	MAP2K5	-1.66265	1.04218e-13	2.16289e-12
ENSG00000178691	SUZ12	2.22139	1.04827e-13	2.17397e-12
ENSG00000058799	YIPF1	-1.26531	1.06599e-13	2.20903e-12
ENSG00000248099	INSL3	5.00214	1.07497e-13	2.22449e-12
ENSG00000181035	SLC25A42	-2.03421	1.07877e-13	2.23074e-12
ENSG00000131748	STARD3	-1.99103	1.08213e-13	2.23606e-12
ENSG00000135218	CD36	-2.99338	1.11391e-13	2.29697e-12
ENSG00000142552	RCN3	-3.47435	1.11402e-13	2.29697e-12
ENSG00000141401	IMPA2	-3.04666	1.13741e-13	2.34351e-12
ENSG00000101017	CD40	1.71482	1.14304e-13	2.35341e-12
ENSG00000145016	KIAA0226	1.49139	1.14654e-13	2.35892e-12
ENSG00000130517	PGPEP1	-2.6475	1.14886e-13	2.362e-12
ENSG00000111728	ST8SIA1	2.59507	1.15434e-13	2.37155e-12
ENSG00000186862	PDZD7	-1.96336	1.15873e-13	2.37886e-12
ENSG00000159374	M1AP	-3.87565	1.16222e-13	2.38431e-12
ENSG00000139835	GRTP1	2.59391	1.16841e-13	2.39527e-12
ENSG00000005469	CROT	-1.722	1.20977e-13	2.47829e-12
ENSG00000175602	CCDC85B	-2.44827	1.22444e-13	2.50656e-12
ENSG00000059377	TBXAS1	-2.24926	1.24345e-13	2.54363e-12
ENSG00000104081	BMF	1.70912	1.24744e-13	2.54998e-12
ENSG00000162971	TYW5	1.43558	1.25432e-13	2.56221e-12
ENSG00000110888	CAPRIN2	-1.43093	1.30386e-13	2.6615e-12
ENSG00000170558	CDH2	-3.72469	1.30865e-13	2.66936e-12
ENSG00000173638	SLC19A1	-2.93379	1.33633e-13	2.72387e-12
ENSG00000100505	TRIM9	3.81196	1.34571e-13	2.74105e-12
ENSG00000185187	SIGIRR	-1.77185	1.36836e-13	2.78322e-12
ENSG00000084112	SSH1	1.89886	1.3872e-13	2.81952e-12
ENSG00000061676	NCKAP1	1.79763	1.39217e-13	2.82761e-12
ENSG00000213886	UBD	4.99954	1.39342e-13	2.82814e-12
ENSG00000154262	ABCA6	-3.80429	1.40867e-13	2.85705e-12
ENSG00000102996	MMP15	-2.7808	1.42227e-13	2.8826e-12
ENSG00000067064	IDI1	1.13115	1.43174e-13	2.89973e-12
ENSG00000127419	TMEM175	-1.77778	1.45187e-13	2.93843e-12
ENSG00000164659	KIAA1324L	1.35491	1.48409e-13	3.0015e-12
ENSG00000163808	KIF15	1.76476	1.48556e-13	3.00152e-12
ENSG00000228594	C1orf233	-1.69019	1.4862e-13	3.00152e-12
ENSG00000114270	COL7A1	2.28842	1.51113e-13	3.0497e-12
ENSG00000084733	RAB10	1.14631	1.54652e-13	3.11234e-12
ENSG00000108799	EZH1	1.00927	1.55272e-13	3.1226e-12
ENSG00000144837	PLA1A	4.45335	1.56111e-13	3.13728e-12
ENSG00000130653	PNPLA7	-2.90829	1.5714e-13	3.15573e-12
ENSG00000175538	KCNE3	-2.74581	1.57453e-13	3.1598e-12
ENSG00000110076	NRXN2	3.18552	1.58034e-13	3.16922e-12
ENSG00000157657	ZNF618	1.89673	1.60349e-13	3.2134e-12
ENSG00000160972	PPP1R16A	-2.21917	1.61138e-13	3.22694e-12
ENSG00000175806	MSRA	-1.70049	1.61506e-13	3.23205e-12
ENSG00000105677	TMEM147	-1.87611	1.62609e-13	3.25183e-12
ENSG00000237441	RGL2	-1.89979	1.64097e-13	3.27931e-12
ENSG00000102893	PHKB	1.21229	1.64989e-13	3.29482e-12
ENSG00000065060	UHRF1BP1	1.74891	1.71036e-13	3.41048e-12
ENSG00000110002	VWA5A	-1.80793	1.71139e-13	3.41048e-12
ENSG00000152556	PFKM	2.78125	1.73248e-13	3.4501e-12
ENSG00000186665	C17orf58	2.93065	1.76211e-13	3.50667e-12
ENSG00000128791	TWSG1	2.23517	1.7707e-13	3.52131e-12
ENSG00000034677	RNF19A	1.86914	1.7921e-13	3.56138e-12
ENSG00000104064	GABPB1	2.03372	1.8083e-13	3.59107e-12
ENSG00000167173	C15orf39	1.7628	1.81343e-13	3.59626e-12
ENSG00000162434	JAK1	1.93492	1.82931e-13	3.62272e-12
ENSG00000075336	TIMM21	-1.69932	1.83279e-13	3.62709e-12
ENSG00000118557	PMFBP1	-3.13941	1.84258e-13	3.64395e-12
ENSG00000114993	RTKN	-2.31872	1.85209e-13	3.66022e-12
ENSG00000198945	L3MBTL3	1.64211	1.9006e-13	3.75349e-12
ENSG00000137261	KIAA0319	3.84079	1.92419e-13	3.79745e-12
ENSG00000104870	FCGRT	-3.05397	1.93651e-13	3.81913e-12
ENSG00000088808	PPP1R13B	-1.88661	1.96431e-13	3.8686e-12
ENSG00000198408	MGEA5	1.42183	2.00332e-13	3.94272e-12
ENSG00000172869	DMXL1	2.07903	2.01488e-13	3.96275e-12
ENSG00000146247	PHIP	1.67095	2.06914e-13	4.06386e-12
ENSG00000136732	GYPC	2.22756	2.11847e-13	4.15218e-12
ENSG00000230778	ANKRD63	-6.04755	2.14403e-13	4.1994e-12
ENSG00000147614	ATP6V0D2	2.376	2.1469e-13	4.20213e-12
ENSG00000177494	ZBED2	5.64171	2.20076e-13	4.3046e-12
ENSG00000134072	CAMK1	-3.52088	2.23856e-13	4.37554e-12
ENSG00000159189	C1QC	-3.36354	2.27031e-13	4.43456e-12
ENSG00000106803	SEC61B	1.50714	2.27728e-13	4.44512e-12
ENSG00000069424	KCNAB2	-1.88212	2.28928e-13	4.4655e-12
ENSG00000164305	CASP3	1.63796	2.37954e-13	4.63841e-12
ENSG00000168273	SMIM4	-2.48372	2.42194e-13	4.71782e-12
ENSG00000178343	SHISA3	5.62722	2.42925e-13	4.72884e-12
ENSG00000142512	SIGLEC10	-4.05694	2.47333e-13	4.81137e-12
ENSG00000035403	VCL	-2.24696	2.49765e-13	4.85207e-12
ENSG00000100276	RASL10A	-3.36278	2.59469e-13	5.02691e-12
ENSG00000115661	STK16	-1.27218	2.59328e-13	5.02691e-12
ENSG00000006282	SPATA20	-1.57421	2.6289e-13	5.08973e-12
ENSG00000122877	EGR2	-2.70833	2.65379e-13	5.13444e-12
ENSG00000144488	ESPNL	-2.58653	2.66288e-13	5.14854e-12
ENSG00000106701	FSD1L	3.93706	2.70691e-13	5.22993e-12
ENSG00000115896	PLCL1	2.40944	2.73062e-13	5.26881e-12
ENSG00000135837	CEP350	2.2556	2.77027e-13	5.34171e-12
ENSG00000121274	PAPD5	2.28426	2.77779e-13	5.3526e-12
ENSG00000165795	NDRG2	-4.22413	2.80364e-13	5.39876e-12
ENSG00000108771	DHX58	2.9603	2.83622e-13	5.45414e-12
ENSG00000160803	UBQLN4	1.10779	2.83839e-13	5.45464e-12
ENSG00000146540	C7orf50	-2.10289	2.9001e-13	5.56575e-12
ENSG00000170989	S1PR1	2.885	2.93832e-13	5.63529e-12
ENSG00000124201	ZNFX1	2.04331	2.96319e-13	5.67537e-12
ENSG00000158373	HIST1H2BD	2.95329	2.96172e-13	5.67537e-12
ENSG00000211445	GPX3	-3.12157	2.9938e-13	5.73015e-12
ENSG00000063438	AHRR	-1.393	3.00983e-13	5.75699e-12
ENSG00000107679	PLEKHA1	1.49558	3.01676e-13	5.76638e-12
ENSG00000149269	PAK1	-1.76354	3.03671e-13	5.80063e-12
ENSG00000118985	ELL2	3.20068	3.08801e-13	5.89467e-12
ENSG00000140254	DUOXA1	-2.3089	3.10807e-13	5.92505e-12
ENSG00000243667	WDR92	-1.29152	3.13308e-13	5.96874e-12
ENSG00000160746	ANO10	-1.57568	3.23497e-13	6.15873e-12
ENSG00000185885	IFITM1	4.51177	3.24639e-13	6.17636e-12
ENSG00000166352	C11orf74	-1.984	3.30053e-13	6.27519e-12
ENSG00000131788	PIAS3	1.67279	3.42991e-13	6.51682e-12
ENSG00000112195	TREML2	-2.68943	3.49499e-13	6.63607e-12
ENSG00000173369	C1QB	-2.89769	3.52118e-13	6.68134e-12
ENSG00000103707	MTFMT	-2.94744	3.54714e-13	6.72615e-12
ENSG00000156931	VPS8	1.98461	3.57668e-13	6.77766e-12
ENSG00000165030	NFIL3	1.7541	3.6009e-13	6.81902e-12
ENSG00000185420	SMYD3	-1.60595	3.66677e-13	6.93916e-12
ENSG00000168944	CEP120	1.62574	3.74437e-13	7.08133e-12
ENSG00000160326	SLC2A6	1.98974	3.7471e-13	7.08179e-12
ENSG00000204531	POU5F1	-1.94371	3.78575e-13	7.15012e-12
ENSG00000163701	IL17RE	-2.46957	3.81448e-13	7.19485e-12
ENSG00000113282	CLINT1	1.77192	3.82547e-13	7.21082e-12
ENSG00000164935	DCSTAMP	2.47334	3.84704e-13	7.24669e-12
ENSG00000077063	CTTNBP2	-4.08919	3.89273e-13	7.32793e-12
ENSG00000144791	LIMD1	-1.16538	3.97664e-13	7.48096e-12
ENSG00000005022	SLC25A5	-1.4325	4.00319e-13	7.52594e-12
ENSG00000112378	PERP	3.99124	4.04397e-13	7.58763e-12
ENSG00000114742	WDR48	1.30814	4.1238e-13	7.73232e-12
ENSG00000198467	TPM2	-3.84215	4.19493e-13	7.86054e-12
ENSG00000137267	TUBB2A	2.46275	4.27919e-13	8.01318e-12
ENSG00000259494	MRPL46	1.44516	4.29903e-13	8.04505e-12
ENSG00000198429	ZNF69	-2.63492	4.38395e-13	8.18786e-12
ENSG00000171223	JUNB	1.33771	4.43181e-13	8.27183e-12
ENSG00000206053	HN1L	1.07023	4.43666e-13	8.27548e-12
ENSG00000075213	SEMA3A	5.02316	4.44886e-13	8.29283e-12
ENSG00000111181	SLC6A12	4.51356	4.52013e-13	8.42018e-12
ENSG00000133401	PDZD2	3.32988	4.60381e-13	8.57046e-12
ENSG00000131759	RARA	-2.43399	4.64426e-13	8.64015e-12
ENSG00000196526	AFAP1	2.89471	4.65179e-13	8.64852e-12
ENSG00000166710	B2M	1.54149	4.68647e-13	8.70732e-12
ENSG00000137713	PPP2R1B	2.27808	4.76829e-13	8.84782e-12
ENSG00000119888	EPCAM	-3.89656	4.80397e-13	8.90824e-12
ENSG00000125827	TMX4	-1.48484	4.82064e-13	8.93336e-12
ENSG00000099139	PCSK5	-2.11103	4.84307e-13	8.96911e-12
ENSG00000141968	VAV1	-2.01951	5.02016e-13	9.29103e-12
ENSG00000106991	ENG	-1.65893	5.11463e-13	9.45913e-12
ENSG00000140395	WDR61	-1.25083	5.11761e-13	9.45913e-12
ENSG00000100629	CEP128	1.69	5.26676e-13	9.72851e-12
ENSG00000115652	UXS1	1.19258	5.34185e-13	9.86084e-12
ENSG00000132541	HRSP12	-2.15868	5.35312e-13	9.87525e-12
ENSG00000130816	DNMT1	-1.63836	5.36533e-13	9.8914e-12
ENSG00000140905	GCSH	-1.71971	5.38673e-13	9.92445e-12
ENSG00000173120	KDM2A	1.14163	5.39882e-13	9.94031e-12
ENSG00000123095	BHLHE41	2.19719	5.40485e-13	9.94499e-12
ENSG00000095637	SORBS1	3.54186	5.42772e-13	9.98064e-12
ENSG00000135414	GDF11	1.62742	5.45302e-13	1.00207e-11
ENSG00000108797	CNTNAP1	3.68975	5.52415e-13	1.01449e-11
ENSG00000118507	AKAP7	1.31569	5.53846e-13	1.01646e-11
ENSG00000139842	CUL4A	0.958432	5.54238e-13	1.01653e-11
ENSG00000139618	BRCA2	2.71293	5.69008e-13	1.04228e-11
ENSG00000185875	THNSL1	-1.94242	5.72931e-13	1.04879e-11
ENSG00000182175	RGMA	5.65879	5.73708e-13	1.04954e-11
ENSG00000159450	TCHH	2.60677	5.75679e-13	1.05248e-11
ENSG00000086189	DIMT1	1.47743	5.80621e-13	1.06015e-11
ENSG00000104067	TJP1	1.81224	5.8843e-13	1.07373e-11
ENSG00000135617	PRADC1	-3.1673	5.93814e-13	1.08286e-11
ENSG00000111452	GPR133	4.27613	5.9688e-13	1.08733e-11
ENSG00000124177	CHD6	1.69353	6.00146e-13	1.09231e-11
ENSG00000119326	CTNNAL1	-2.70979	6.02883e-13	1.09659e-11
ENSG00000147050	KDM6A	1.72833	6.05195e-13	1.1001e-11
ENSG00000115009	CCL20	9.05928	6.16035e-13	1.11838e-11
ENSG00000108370	RGS9	2.40534	6.1725e-13	1.11987e-11
ENSG00000124104	SNX21	-1.5523	6.26306e-13	1.13414e-11
ENSG00000175265	GOLGA8A	-1.88701	6.34762e-13	1.14873e-11
ENSG00000142634	EFHD2	-1.7515	6.43238e-13	1.16259e-11
ENSG00000271605	MILR1	-1.84826	6.51952e-13	1.17685e-11
ENSG00000170214	ADRA1B	8.66391	6.58336e-13	1.18762e-11
ENSG00000145777	TSLP	5.18415	6.5904e-13	1.18814e-11
ENSG00000183813	CCR4	2.95607	6.64071e-13	1.19646e-11
ENSG00000100360	IFT27	-1.81203	6.75312e-13	1.21518e-11
ENSG00000104450	SPAG1	2.16471	6.75301e-13	1.21518e-11
ENSG00000118420	UBE3D	-2.09942	6.9422e-13	1.24763e-11
ENSG00000169621	APLF	1.22711	6.95682e-13	1.24947e-11
ENSG00000104884	ERCC2	-2.12336	7.04827e-13	1.2651e-11
ENSG00000172432	GTPBP2	1.19566	7.05346e-13	1.26524e-11
ENSG00000108465	CDK5RAP3	-1.58528	7.11894e-13	1.27618e-11
ENSG00000157106	SMG1	1.72024	7.23036e-13	1.29534e-11
ENSG00000117245	KIF17	-3.69486	7.24725e-13	1.29755e-11
ENSG00000104921	FCER2	-2.67893	7.46623e-13	1.33592e-11
ENSG00000169432	SCN9A	-4.06858	7.49102e-13	1.33868e-11
ENSG00000213199	ASIC3	-1.98859	7.49052e-13	1.33868e-11
ENSG00000160285	LSS	1.74627	7.57573e-13	1.35128e-11
ENSG00000166348	USP54	2.61839	7.59463e-13	1.35381e-11
ENSG00000196353	CPNE4	3.53921	7.706e-13	1.3728e-11
ENSG00000173960	UBXN2A	1.41902	7.77393e-13	1.38318e-11
ENSG00000186188	FFAR4	-4.67564	7.87879e-13	1.40096e-11
ENSG00000124074	ENKD1	-1.49475	7.88814e-13	1.40175e-11
ENSG00000163635	ATXN7	1.5757	8.06954e-13	1.4331e-11
ENSG00000165886	UBTD1	-1.70831	8.15091e-13	1.44665e-11
ENSG00000185432	METTL7A	-2.59185	8.16135e-13	1.4476e-11
ENSG00000163626	COX18	-1.38929	8.27277e-13	1.46645e-11
ENSG00000091317	CMTM6	1.49106	8.40549e-13	1.48905e-11
ENSG00000099204	ABLIM1	3.32812	8.51978e-13	1.50837e-11
ENSG00000144233	AMMECR1L	1.22736	8.53949e-13	1.51092e-11
ENSG00000072135	PTPN18	-1.87695	8.58887e-13	1.51871e-11
ENSG00000124256	ZBP1	2.50025	8.65657e-13	1.52879e-11
ENSG00000188921	PTPLAD2	-1.61631	8.68626e-13	1.53309e-11
ENSG00000110108	TMEM109	-1.30465	8.8602e-13	1.56282e-11
ENSG00000204310	AGPAT1	-2.00003	8.8793e-13	1.56522e-11
ENSG00000147010	SH3KBP1	1.4865	9.1915e-13	1.61926e-11
ENSG00000102572	STK24	1.36213	9.31851e-13	1.64062e-11
ENSG00000183963	SMTN	-1.76887	9.63277e-13	1.6949e-11
ENSG00000205659	LIN52	1.49028	9.65319e-13	1.69745e-11
ENSG00000173588	CCDC41	1.8264	9.67817e-13	1.7008e-11
ENSG00000198477	ZNF280B	2.43687	9.73406e-13	1.70957e-11
ENSG00000165025	SYK	-2.2731	1.00033e-12	1.7547e-11
ENSG00000149499	EML3	-1.27894	1.01407e-12	1.77771e-11
ENSG00000156521	TYSND1	-1.59409	1.01488e-12	1.77804e-11
ENSG00000107282	APBA1	-3.95099	1.0184e-12	1.7831e-11
ENSG00000248727	CTC-236F12.4	3.22377	1.02022e-12	1.78519e-11
ENSG00000197409	HIST1H3D	3.09353	1.04254e-12	1.82313e-11
ENSG00000165891	E2F7	4.10509	1.04322e-12	1.82321e-11
ENSG00000174080	CTSF	-2.73816	1.05234e-12	1.83802e-11
ENSG00000124635	HIST1H2BJ	2.92346	1.06362e-12	1.8566e-11
ENSG00000006555	TTC22	1.6946	1.07428e-12	1.87406e-11
ENSG00000091490	SEL1L3	3.48313	1.08626e-12	1.89379e-11
ENSG00000076382	SPAG5	-2.59254	1.12436e-12	1.95902e-11
ENSG00000140688	C16orf58	-1.31822	1.13288e-12	1.97267e-11
ENSG00000197635	DPP4	2.80005	1.14806e-12	1.99788e-11
ENSG00000170430	MGMT	-2.59926	1.15528e-12	2.00922e-11
ENSG00000189067	LITAF	1.27996	1.17257e-12	2.03804e-11
ENSG00000159674	SPON2	2.56069	1.17879e-12	2.04762e-11
ENSG00000139508	SLC46A3	-2.97436	1.20401e-12	2.08888e-11
ENSG00000139370	SLC15A4	1.607	1.21159e-12	2.10075e-11
ENSG00000105825	TFPI2	3.69016	1.21623e-12	2.10752e-11
ENSG00000213064	SFT2D2	-1.23817	1.21941e-12	2.11175e-11
ENSG00000113269	RNF130	-1.88088	1.22573e-12	2.12141e-11
ENSG00000216490	IFI30	1.44072	1.22854e-12	2.12498e-11
ENSG00000155893	ACPL2	1.57183	1.23107e-12	2.12806e-11
ENSG00000104290	FZD3	-3.11125	1.2429e-12	2.14722e-11
ENSG00000158555	GDPD5	-2.09074	1.24703e-12	2.15306e-11
ENSG00000213614	HEXA	-2.07871	1.25284e-12	2.16178e-11
ENSG00000134996	OSTF1	1.18977	1.27155e-12	2.19273e-11
ENSG00000007264	MATK	-2.39852	1.2896e-12	2.22251e-11
ENSG00000172893	DHCR7	1.87746	1.29767e-12	2.23507e-11
ENSG00000149091	DGKZ	-1.61974	1.30083e-12	2.23917e-11
ENSG00000079387	SENP1	1.762	1.30851e-12	2.25104e-11
ENSG00000155367	PPM1J	-2.35582	1.31654e-12	2.26349e-11
ENSG00000183307	CECR6	-2.95937	1.33683e-12	2.29699e-11
ENSG00000065613	SLK	1.45804	1.3455e-12	2.31048e-11
ENSG00000107338	SHB	-2.30439	1.3949e-12	2.39388e-11
ENSG00000107731	UNC5B	-2.51588	1.39718e-12	2.39636e-11
ENSG00000040199	PHLPP2	1.84644	1.40086e-12	2.39979e-11
ENSG00000006625	GGCT	-1.51824	1.4078e-12	2.41023e-11
ENSG00000128694	OSGEPL1	-1.84616	1.42713e-12	2.44185e-11
ENSG00000136874	STX17	1.7163	1.43116e-12	2.44729e-11
ENSG00000128928	IVD	-1.03825	1.4349e-12	2.4522e-11
ENSG00000135185	TMEM243	-2.40665	1.43977e-12	2.45906e-11
ENSG00000135723	FHOD1	-2.90279	1.44483e-12	2.46622e-11
ENSG00000184497	TMEM255B	-2.85327	1.45055e-12	2.47451e-11
ENSG00000123130	ACOT9	1.60152	1.47745e-12	2.51889e-11
ENSG00000204839	MROH6	-2.58116	1.51664e-12	2.58417e-11
ENSG00000007944	MYLIP	2.55686	1.52865e-12	2.60154e-11
ENSG00000100714	MTHFD1	-1.78118	1.52807e-12	2.60154e-11
ENSG00000178385	PLEKHM3	3.15616	1.54128e-12	2.62146e-11
ENSG00000100304	TTLL12	-1.33069	1.56257e-12	2.65609e-11
ENSG00000164867	NOS3	-3.91828	1.58215e-12	2.68778e-11
ENSG00000136404	TM6SF1	-2.68196	1.62694e-12	2.76222e-11
ENSG00000171960	PPIH	-1.63198	1.63e-12	2.76577e-11
ENSG00000079277	MKNK1	-2.04917	1.63457e-12	2.77187e-11
ENSG00000160791	CCR5	-2.94636	1.64484e-12	2.78599e-11
ENSG00000070371	CLTCL1	-1.78683	1.67656e-12	2.83802e-11
ENSG00000135914	HTR2B	3.11886	1.70547e-12	2.88043e-11
ENSG00000160208	RRP1B	-1.46632	1.70565e-12	2.88043e-11
ENSG00000162076	FLYWCH2	-1.57486	1.7043e-12	2.88043e-11
ENSG00000090487	SPG21	-1.75392	1.70669e-12	2.8805e-11
ENSG00000075151	EIF4G3	-2.50924	1.79516e-12	3.02267e-11
ENSG00000187266	EPOR	-1.44592	1.82603e-12	3.07283e-11
ENSG00000121879	PIK3CA	2.00975	1.83215e-12	3.08132e-11
ENSG00000197892	KIF13B	1.74017	1.85144e-12	3.11193e-11
ENSG00000112576	CCND3	-1.83052	1.87721e-12	3.15338e-11
ENSG00000187676	B3GALTL	-1.94072	1.8931e-12	3.1782e-11
ENSG00000132003	ZSWIM4	2.19314	1.90797e-12	3.20129e-11
ENSG00000169857	AVEN	1.706	1.9413e-12	3.25338e-11
ENSG00000164303	ENPP6	3.19822	1.97085e-12	3.30098e-11
ENSG00000118855	MFSD1	-1.76517	1.98246e-12	3.31848e-11
ENSG00000120211	INSL4	3.49364	1.99951e-12	3.34506e-11
ENSG00000197629	MPEG1	-3.8456	2.01871e-12	3.37519e-11
ENSG00000134508	CABLES1	-2.31064	2.03346e-12	3.39588e-11
ENSG00000137801	THBS1	4.48758	2.04584e-12	3.41456e-11
ENSG00000166228	PCBD1	-1.09865	2.06824e-12	3.44992e-11
ENSG00000100077	ADRBK2	1.25679	2.0709e-12	3.45235e-11
ENSG00000198431	TXNRD1	1.75051	2.09123e-12	3.4842e-11
ENSG00000170448	NFXL1	-2.54762	2.09748e-12	3.49258e-11
ENSG00000197021	CXorf40B	1.55499	2.20505e-12	3.66956e-11
ENSG00000123933	MXD4	-1.62822	2.25452e-12	3.7497e-11
ENSG00000101546	RBFA	-1.71729	2.25778e-12	3.75294e-11
ENSG00000179532	DNHD1	1.29661	2.29268e-12	3.8043e-11
ENSG00000135842	FAM129A	2.09981	2.31217e-12	3.83441e-11
ENSG00000010327	STAB1	-3.68438	2.31572e-12	3.83807e-11
ENSG00000162946	DISC1	-1.5763	2.33591e-12	3.86929e-11
ENSG00000131979	GCH1	3.89825	2.37894e-12	3.93372e-11
ENSG00000145911	N4BP3	1.73552	2.39831e-12	3.96181e-11
ENSG00000173039	RELA	1.31467	2.3987e-12	3.96181e-11
ENSG00000163464	CXCR1	-3.6558	2.41091e-12	3.97967e-11
ENSG00000111266	DUSP16	2.05248	2.41705e-12	3.98659e-11
ENSG00000145014	TMEM44	-2.04129	2.41789e-12	3.98659e-11
ENSG00000115325	DOK1	-2.07168	2.41976e-12	3.98736e-11
ENSG00000173660	UQCRH	-1.40164	2.44375e-12	4.02458e-11
ENSG00000154099	DNAAF1	4.03109	2.45639e-12	4.04307e-11
ENSG00000167772	ANGPTL4	2.37737	2.50342e-12	4.11336e-11
ENSG00000134109	EDEM1	2.17966	2.53304e-12	4.15724e-11
ENSG00000088320	REM1	6.07532	2.60295e-12	4.26707e-11
ENSG00000151882	CCL28	1.80634	2.60641e-12	4.27029e-11
ENSG00000107551	RASSF4	1.38299	2.64183e-12	4.32584e-11
ENSG00000103174	NAGPA	-1.81839	2.72556e-12	4.45784e-11
ENSG00000163697	APBB2	3.6445	2.76239e-12	4.51549e-11
ENSG00000158470	B4GALT5	1.8177	2.79083e-12	4.55937e-11
ENSG00000037897	METTL1	1.15402	2.79963e-12	4.57113e-11
ENSG00000173890	GPR160	2.04831	2.83502e-12	4.62626e-11
ENSG00000130304	SLC27A1	-1.46879	2.86414e-12	4.66578e-11
ENSG00000229644	NAMPTL	3.75287	2.86614e-12	4.66638e-11
ENSG00000117862	TXNDC12	-1.03861	2.91669e-12	4.74599e-11
ENSG00000135776	ABCB10	1.51138	2.96076e-12	4.81495e-11
ENSG00000134516	DOCK2	-1.80936	2.98789e-12	4.85631e-11
ENSG00000197555	SIPA1L1	1.95502	3.01655e-12	4.90008e-11
ENSG00000130413	STK33	1.54185	3.09675e-12	5.02751e-11
ENSG00000160219	GAB3	-1.40424	3.15355e-12	5.11391e-11
ENSG00000137038	TMEM261	-1.80995	3.16538e-12	5.12728e-11
ENSG00000141469	SLC14A1	2.07405	3.16439e-12	5.12728e-11
ENSG00000143507	DUSP10	2.31673	3.24894e-12	5.25963e-11
ENSG00000070018	LRP6	1.62176	3.26036e-12	5.27513e-11
ENSG00000019991	HGF	4.27548	3.30165e-12	5.33892e-11
ENSG00000189007	ADAT2	-1.66978	3.30533e-12	5.34184e-11
ENSG00000116701	NCF2	-2.42604	3.36232e-12	5.42861e-11
ENSG00000141295	SCRN2	-2.1162	3.36282e-12	5.42861e-11
ENSG00000171777	RASGRP4	-2.11447	3.38321e-12	5.45844e-11
ENSG00000131196	NFATC1	-1.06819	3.39816e-12	5.47946e-11
ENSG00000075240	GRAMD4	-2.65408	3.41521e-12	5.50384e-11
ENSG00000174292	TNK1	-1.93887	3.41809e-12	5.50538e-11
ENSG00000007372	PAX6	-1.91388	3.45736e-12	5.56236e-11
ENSG00000127481	UBR4	1.49609	3.50224e-12	5.63139e-11
ENSG00000140945	CDH13	-2.67196	3.50915e-12	5.63933e-11
ENSG00000204882	GPR20	-5.5539	3.56338e-12	5.72326e-11
ENSG00000172548	NIPAL4	3.55041	3.6009e-12	5.78026e-11
ENSG00000015285	WAS	-1.98553	3.60399e-12	5.78197e-11
ENSG00000165215	CLDN3	-5.70532	3.61218e-12	5.79186e-11
ENSG00000136936	XPA	-1.4035	3.65566e-12	5.85829e-11
ENSG00000136826	KLF4	-2.5642	3.66256e-12	5.86605e-11
ENSG00000188690	UROS	-1.27656	3.70304e-12	5.92756e-11
ENSG00000178971	CTC1	1.41726	3.71147e-12	5.93772e-11
ENSG00000149257	SERPINH1	-1.33489	3.71988e-12	5.94785e-11
ENSG00000125352	RNF113A	-1.32355	3.7904e-12	6.05383e-11
ENSG00000131504	DIAPH1	-1.42857	3.84281e-12	6.13067e-11
ENSG00000150636	CCDC102B	-2.57519	3.84254e-12	6.13067e-11
ENSG00000166548	TK2	-2.60615	3.85959e-12	6.15058e-11
ENSG00000147905	ZCCHC7	-1.51656	3.87302e-12	6.16853e-11
ENSG00000145476	CYP4V2	-1.92809	3.91488e-12	6.23172e-11
ENSG00000188026	RILPL1	-2.57187	3.96606e-12	6.30969e-11
ENSG00000153064	BANK1	-1.88559	4.01457e-12	6.3833e-11
ENSG00000166750	SLFN5	2.44972	4.03696e-12	6.41533e-11
ENSG00000164105	SAP30	-1.23329	4.09668e-12	6.503e-11
ENSG00000006007	GDE1	-1.41523	4.12032e-12	6.53688e-11
ENSG00000164379	FOXQ1	-4.06439	4.13332e-12	6.55315e-11
ENSG00000187626	ZKSCAN4	-1.70982	4.13516e-12	6.55315e-11
ENSG00000091831	ESR1	-3.23235	4.16534e-12	6.59731e-11
ENSG00000114127	XRN1	2.59142	4.212e-12	6.66752e-11
ENSG00000138002	IFT172	-1.303	4.26163e-12	6.73861e-11
ENSG00000110934	BIN2	-1.39661	4.32203e-12	6.83033e-11
ENSG00000108984	MAP2K6	-2.34635	4.33996e-12	6.85488e-11
ENSG00000188056	TREML4	4.43665	4.37311e-12	6.90342e-11
ENSG00000132429	POPDC3	8.54276	4.4525e-12	7.02098e-11
ENSG00000165929	TC2N	3.16526	4.45813e-12	7.02598e-11
ENSG00000213339	QTRT1	-2.00731	4.61214e-12	7.26069e-11
ENSG00000205502	C2CD4B	7.28634	4.65105e-12	7.31791e-11
ENSG00000162769	FLVCR1	1.25235	4.65674e-12	7.32282e-11
ENSG00000145901	TNIP1	1.67712	4.74482e-12	7.45723e-11
ENSG00000136274	NACAD	5.26757	4.79894e-12	7.53813e-11
ENSG00000100364	KIAA0930	-2.56775	4.82168e-12	7.56969e-11
ENSG00000148735	PLEKHS1	3.49772	4.85714e-12	7.62117e-11
ENSG00000084070	SMAP2	1.75307	4.87656e-12	7.64745e-11
ENSG00000080561	MID2	-2.39329	4.88258e-12	7.65268e-11
ENSG00000006210	CX3CL1	2.36441	4.94002e-12	7.73846e-11
ENSG00000144589	STK11IP	-1.20387	4.95e-12	7.74559e-11
ENSG00000164543	STK17A	1.53461	4.95467e-12	7.74866e-11
ENSG00000198740	ZNF652	-1.73583	5.01209e-12	7.83416e-11
ENSG00000226124	FTCDNL1	-2.65323	5.01784e-12	7.83886e-11
ENSG00000167632	TRAPPC9	-1.28376	5.10182e-12	7.9657e-11
ENSG00000143499	SMYD2	-1.25015	5.20667e-12	8.12497e-11
ENSG00000078401	EDN1	5.68335	5.24355e-12	8.17806e-11
ENSG00000188811	NHLRC3	-1.80855	5.30033e-12	8.26209e-11
ENSG00000128185	DGCR6L	-1.85095	5.30688e-12	8.26779e-11
ENSG00000183647	ZNF530	-1.54387	5.36795e-12	8.35838e-11
ENSG00000004660	CAMKK1	-2.71655	5.44918e-12	8.48023e-11
ENSG00000140474	ULK3	-1.10384	5.48537e-12	8.5319e-11
ENSG00000130349	C6orf203	-1.51828	5.48917e-12	8.53316e-11
ENSG00000124587	PEX6	-1.46066	5.49361e-12	8.53542e-11
ENSG00000100564	PIGH	-1.24323	5.5479e-12	8.6104e-11
ENSG00000248385	TARM1	-2.52164	5.54581e-12	8.6104e-11
ENSG00000100583	SAMD15	2.52506	5.6792e-12	8.80069e-11
ENSG00000165271	NOL6	-1.23763	5.68954e-12	8.81107e-11
ENSG00000167701	GPT	-3.71867	5.71096e-12	8.83945e-11
ENSG00000100280	AP1B1	-2.14281	5.71959e-12	8.84802e-11
ENSG00000124224	PPP4R1L	1.45452	5.73225e-12	8.86279e-11
ENSG00000151612	ZNF827	2.22962	5.83633e-12	9.01884e-11
ENSG00000056050	C4orf27	-1.81463	6.19757e-12	9.57188e-11
ENSG00000035862	TIMP2	-1.9942	6.21995e-12	9.60125e-11
ENSG00000181264	TMEM136	2.16788	6.25095e-12	9.64389e-11
ENSG00000148488	ST8SIA6	1.76735	6.26219e-12	9.65601e-11
ENSG00000142949	PTPRF	3.23395	6.2785e-12	9.67593e-11
ENSG00000173918	C1QTNF1	8.35215	6.30781e-12	9.71062e-11
ENSG00000144935	TRPC1	2.532	6.43821e-12	9.9007e-11
ENSG00000149403	GRIK4	5.56597	6.4472e-12	9.90919e-11
ENSG00000142765	SYTL1	-3.36744	6.53267e-12	1.00298e-10
ENSG00000159921	GNE	1.07476	6.56631e-12	1.0076e-10
ENSG00000174306	ZHX3	-2.60767	6.61503e-12	1.01453e-10
ENSG00000138617	PARP16	-1.58733	6.63592e-12	1.01719e-10
ENSG00000043143	JADE2	1.75761	6.74829e-12	1.03386e-10
ENSG00000197646	PDCD1LG2	1.55705	6.76261e-12	1.03549e-10
ENSG00000253873	PCDHGA11	3.55387	6.77233e-12	1.03643e-10
ENSG00000151702	FLI1	-2.26664	6.85976e-12	1.04925e-10
ENSG00000179364	PACS2	-1.75696	6.95611e-12	1.06341e-10
ENSG00000114554	PLXNA1	1.70296	7.0255e-12	1.07296e-10
ENSG00000184730	APOBR	-2.15169	7.16733e-12	1.09395e-10
ENSG00000134253	TRIM45	-1.35965	7.23792e-12	1.10413e-10
ENSG00000255150	EID3	1.94876	7.2916e-12	1.11173e-10
ENSG00000214941	ZSWIM7	-1.53127	7.31304e-12	1.1144e-10
ENSG00000164300	SERINC5	2.23727	7.34696e-12	1.11837e-10
ENSG00000259642	C15orf37	2.83734	7.401e-12	1.126e-10
ENSG00000137710	RDX	1.98342	7.73829e-12	1.1755e-10
ENSG00000148908	RGS10	-1.6339	7.7387e-12	1.1755e-10
ENSG00000155252	PI4K2A	1.72074	7.78927e-12	1.18255e-10
ENSG00000186807	ANXA8L2	6.50866	7.81217e-12	1.1854e-10
ENSG00000183780	SLC35F3	-3.2059	7.87423e-12	1.19418e-10
ENSG00000057657	PRDM1	1.29322	7.91036e-12	1.19902e-10
ENSG00000104325	DECR1	-1.32838	8.05236e-12	1.2199e-10
ENSG00000169429	IL8	7.63122	8.16459e-12	1.23625e-10
ENSG00000170500	LONRF2	3.75219	8.20962e-12	1.24175e-10
ENSG00000154263	ABCA10	1.35519	8.29677e-12	1.25427e-10
ENSG00000072954	TMEM38A	-1.62299	8.34226e-12	1.26048e-10
ENSG00000128309	MPST	-2.09873	8.44679e-12	1.27559e-10
ENSG00000155099	TMEM55A	-3.23787	8.5249e-12	1.28671e-10
ENSG00000141447	OSBPL1A	-2.08993	8.59286e-12	1.29628e-10
ENSG00000107263	RAPGEF1	1.31669	8.83004e-12	1.33066e-10
ENSG00000143401	ANP32E	1.16203	8.85343e-12	1.33348e-10
ENSG00000167107	ACSF2	-2.45711	8.94384e-12	1.34638e-10
ENSG00000188352	FOCAD	-1.83017	8.99053e-12	1.3527e-10
ENSG00000137831	UACA	-1.62282	9.06422e-12	1.36307e-10
ENSG00000152213	ARL11	-1.90903	9.1122e-12	1.36956e-10
ENSG00000188282	RUFY4	-3.3188	9.25582e-12	1.39042e-10
ENSG00000140545	MFGE8	-1.75192	9.39544e-12	1.41065e-10
ENSG00000105928	DFNA5	3.05156	9.42091e-12	1.41373e-10
ENSG00000222020	AC062017.1	-2.01637	9.57706e-12	1.43641e-10
ENSG00000142945	KIF2C	2.39438	9.68491e-12	1.45182e-10
ENSG00000100307	CBX7	-1.23322	9.71461e-12	1.45551e-10
ENSG00000111729	CLEC4A	-3.24295	9.77835e-12	1.46429e-10
ENSG00000114248	LRRC31	5.29113	9.79562e-12	1.46611e-10
ENSG00000181652	ATG9B	-3.82048	9.8822e-12	1.47829e-10
ENSG00000002586	CD99	-1.43139	9.97385e-12	1.48966e-10
ENSG00000042317	SPATA7	-1.67691	9.96992e-12	1.48966e-10
ENSG00000178802	MPI	-1.10137	9.96438e-12	1.48966e-10
ENSG00000138279	ANXA7	1.10623	1.0018e-11	1.49547e-10
ENSG00000172081	MOB3A	1.42687	1.01651e-11	1.51665e-10
ENSG00000225968	ELFN1	-2.44393	1.02118e-11	1.52281e-10
ENSG00000163687	DNASE1L3	-3.31847	1.04247e-11	1.55294e-10
ENSG00000115756	HPCAL1	-1.64042	1.05547e-11	1.57149e-10
ENSG00000164403	SHROOM1	-1.99777	1.05857e-11	1.57528e-10
ENSG00000160113	NR2F6	-1.75758	1.07106e-11	1.59303e-10
ENSG00000119686	FLVCR2	-1.20085	1.07205e-11	1.59368e-10
ENSG00000114923	SLC4A3	-7.12839	1.08251e-11	1.60839e-10
ENSG00000170456	DENND5B	1.98141	1.09024e-11	1.61903e-10
ENSG00000134490	TMEM241	-1.85986	1.09763e-11	1.62916e-10
ENSG00000174990	CA5A	-3.85818	1.10894e-11	1.64509e-10
ENSG00000133805	AMPD3	2.19998	1.11823e-11	1.65801e-10
ENSG00000120899	PTK2B	2.77411	1.12169e-11	1.66227e-10
ENSG00000139197	PEX5	-1.12249	1.12547e-11	1.66615e-10
ENSG00000261594	TPBGL	-4.09877	1.13009e-11	1.67213e-10
ENSG00000144579	CTDSP1	-1.52948	1.13083e-11	1.67235e-10
ENSG00000206530	WDR52	-1.60088	1.16433e-11	1.72101e-10
ENSG00000053918	KCNQ1	-1.38065	1.16678e-11	1.72373e-10
ENSG00000129472	RAB2B	2.01899	1.16989e-11	1.72744e-10
ENSG00000007038	PRSS21	-2.3598	1.18054e-11	1.74226e-10
ENSG00000164463	CREBRF	2.07139	1.18266e-11	1.74449e-10
ENSG00000186575	NF2	-1.46568	1.18807e-11	1.75155e-10
ENSG00000127884	ECHS1	-1.51163	1.22585e-11	1.80539e-10
ENSG00000196428	TSC22D2	1.28454	1.23979e-11	1.82498e-10
ENSG00000187510	PLEKHG7	4.53804	1.24581e-11	1.8329e-10
ENSG00000104368	PLAT	4.78622	1.24971e-11	1.83769e-10
ENSG00000154114	TBCEL	1.5214	1.2601e-11	1.85202e-10
ENSG00000106069	CHN2	-2.95768	1.28749e-11	1.89033e-10
ENSG00000176533	GNG7	-2.53093	1.29416e-11	1.89914e-10
ENSG00000142910	TINAGL1	3.88874	1.31794e-11	1.93304e-10
ENSG00000089050	RBBP9	1.43421	1.34265e-11	1.96727e-10
ENSG00000072062	PRKACA	-1.69829	1.3462e-11	1.97099e-10
ENSG00000204482	LST1	-3.29837	1.34657e-11	1.97099e-10
ENSG00000100034	PPM1F	-2.26757	1.3489e-11	1.97338e-10
ENSG00000169249	ZRSR2	-1.29842	1.37135e-11	2.00521e-10
ENSG00000093072	CECR1	-2.47703	1.39267e-11	2.03534e-10
ENSG00000131778	CHD1L	-1.39545	1.39728e-11	2.03998e-10
ENSG00000135801	TAF5L	1.1046	1.39721e-11	2.03998e-10
ENSG00000116096	SPR	-2.08707	1.40065e-11	2.04386e-10
ENSG00000011132	APBA3	1.11173	1.40322e-11	2.04656e-10
ENSG00000244486	SCARF2	-2.6333	1.43284e-11	2.08763e-10
ENSG00000114948	ADAM23	-4.041	1.43522e-11	2.09003e-10
ENSG00000008294	SPAG9	1.48688	1.46324e-11	2.12975e-10
ENSG00000105576	TNPO2	1.16175	1.46532e-11	2.13169e-10
ENSG00000111405	ENDOU	4.95627	1.47894e-11	2.15041e-10
ENSG00000120053	GOT1	-1.55048	1.48739e-11	2.16159e-10
ENSG00000159199	ATP5G1	-1.61021	1.50154e-11	2.17773e-10
ENSG00000100060	MFNG	-2.56054	1.50367e-11	2.17971e-10
ENSG00000125648	SLC25A23	-2.2678	1.51403e-11	2.19361e-10
ENSG00000106689	LHX2	5.20535	1.53309e-11	2.2201e-10
ENSG00000107957	SH3PXD2A	1.8485	1.54024e-11	2.22916e-10
ENSG00000188263	IL17REL	2.90716	1.54296e-11	2.231e-10
ENSG00000100150	DEPDC5	-1.1469	1.55252e-11	2.24369e-10
ENSG00000038427	VCAN	2.72733	1.58895e-11	2.29402e-10
ENSG00000178573	MAF	-3.15393	1.5985e-11	2.30663e-10
ENSG00000169442	CD52	-2.45355	1.61066e-11	2.32301e-10
ENSG00000118292	C1orf54	-2.3174	1.61278e-11	2.3249e-10
ENSG00000006747	SCIN	3.07583	1.61802e-11	2.33126e-10
ENSG00000178982	EIF3K	-1.74539	1.6261e-11	2.34055e-10
ENSG00000125863	MKKS	-1.38917	1.64655e-11	2.36761e-10
ENSG00000213380	COG8	-1.05786	1.6461e-11	2.36761e-10
ENSG00000006652	IFRD1	1.43499	1.65414e-11	2.37731e-10
ENSG00000167733	HSD11B1L	-1.49525	1.6566e-11	2.37966e-10
ENSG00000166532	RIMKLB	2.06427	1.66481e-11	2.39024e-10
ENSG00000185664	PMEL	1.8371	1.67802e-11	2.408e-10
ENSG00000100099	HPS4	-1.28931	1.6829e-11	2.41379e-10
ENSG00000130340	SNX9	1.07867	1.68725e-11	2.41882e-10
ENSG00000164684	ZNF704	-3.27034	1.69191e-11	2.42428e-10
ENSG00000140749	IGSF6	-2.13585	1.71911e-11	2.46202e-10
ENSG00000083444	PLOD1	-1.63242	1.73443e-11	2.48221e-10
ENSG00000141527	CARD14	-1.49642	1.73495e-11	2.48221e-10
ENSG00000010626	LRRC23	-1.59348	1.7388e-11	2.48648e-10
ENSG00000082497	SERTAD4	-4.90724	1.74186e-11	2.48961e-10
ENSG00000065559	MAP2K4	0.95886	1.78735e-11	2.55242e-10
ENSG00000139372	TDG	1.26896	1.78759e-11	2.55242e-10
ENSG00000175262	C1orf127	-2.09224	1.82168e-11	2.59978e-10
ENSG00000023892	DEF6	-2.58101	1.82805e-11	2.60757e-10
ENSG00000044012	GUCA2B	5.77677	1.84339e-11	2.62814e-10
ENSG00000160539	PPAPDC3	-3.19513	1.89958e-11	2.70555e-10
ENSG00000125266	EFNB2	3.4681	1.91747e-11	2.72968e-10
ENSG00000167645	YIF1B	-1.6443	1.9199e-11	2.73177e-10
ENSG00000109775	UFSP2	-1.14724	1.9786e-11	2.81389e-10
ENSG00000065325	GLP2R	4.27673	1.998e-11	2.83865e-10
ENSG00000167123	CERCAM	-1.65813	2.01401e-11	2.85998e-10
ENSG00000212734	C17orf100	-4.27833	2.0514e-11	2.91162e-10
ENSG00000130560	UBAC1	-1.56638	2.05605e-11	2.91678e-10
ENSG00000196126	HLA-DRB1	-2.24197	2.061e-11	2.92235e-10
ENSG00000196372	ASB13	-1.27099	2.0955e-11	2.96979e-10
ENSG00000146416	AIG1	-2.44922	2.10232e-11	2.97798e-10
ENSG00000108510	MED13	1.73053	2.10726e-11	2.98349e-10
ENSG00000158406	HIST1H4H	1.86832	2.12322e-11	3.0046e-10
ENSG00000122515	ZMIZ2	1.12569	2.16211e-11	3.05812e-10
ENSG00000164442	CITED2	-1.95934	2.17746e-11	3.0783e-10
ENSG00000117091	CD48	2.03671	2.25573e-11	3.18737e-10
ENSG00000116031	CD207	4.26299	2.27037e-11	3.20647e-10
ENSG00000182853	VMO1	1.65079	2.30746e-11	3.25724e-10
ENSG00000163110	PDLIM5	1.21286	2.33103e-11	3.28889e-10
ENSG00000079482	OPHN1	-1.3808	2.38837e-11	3.36813e-10
ENSG00000187017	ESPN	-3.35167	2.39879e-11	3.38116e-10
ENSG00000100814	CCNB1IP1	-1.75564	2.40272e-11	3.38503e-10
ENSG00000170464	DNAJC18	1.71465	2.43094e-11	3.42309e-10
ENSG00000168916	ZNF608	2.71811	2.44234e-11	3.43746e-10
ENSG00000166592	RRAD	3.1113	2.45502e-11	3.4536e-10
ENSG00000135436	FAM186B	2.93811	2.50357e-11	3.52015e-10
ENSG00000173930	SLCO4C1	2.99042	2.53369e-11	3.559e-10
ENSG00000169738	DCXR	-2.02198	2.55474e-11	3.58682e-10
ENSG00000125388	GRK4	-1.4075	2.55669e-11	3.58778e-10
ENSG00000196504	PRPF40A	1.36492	2.55818e-11	3.58811e-10
ENSG00000261794	GOLGA8H	2.56261	2.61301e-11	3.66142e-10
ENSG00000181027	FKRP	1.20046	2.6186e-11	3.66745e-10
ENSG00000243156	MICAL3	1.96356	2.63938e-11	3.69475e-10
ENSG00000003147	ICA1	-1.84836	2.73229e-11	3.82106e-10
ENSG00000164309	CMYA5	1.89509	2.79993e-11	3.91374e-10
ENSG00000171608	PIK3CD	-1.26211	2.84237e-11	3.97111e-10
ENSG00000132164	SLC6A11	-3.05475	2.85587e-11	3.98802e-10
ENSG00000105366	SIGLEC8	-4.32015	2.88866e-11	4.02987e-10
ENSG00000166734	CASC4	1.45684	2.9215e-11	4.07369e-10
ENSG00000105135	ILVBL	-1.89783	2.94636e-11	4.10436e-10
ENSG00000111331	OAS3	3.88842	2.95008e-11	4.10753e-10
ENSG00000127415	IDUA	-1.97701	2.95909e-11	4.11806e-10
ENSG00000171552	BCL2L1	2.34728	2.96497e-11	4.12425e-10
ENSG00000168394	TAP1	2.15802	2.98077e-11	4.1442e-10
ENSG00000213619	NDUFS3	-1.61954	2.99039e-11	4.15556e-10
ENSG00000134769	DTNA	-2.68585	3.00606e-11	4.17529e-10
ENSG00000130477	UNC13A	3.93315	3.01567e-11	4.18661e-10
ENSG00000124370	MCEE	-1.72971	3.02079e-11	4.19168e-10
ENSG00000166451	CENPN	-0.973643	3.06995e-11	4.25783e-10
ENSG00000145214	DGKQ	-0.966072	3.10173e-11	4.29981e-10
ENSG00000197063	MAFG	1.14557	3.10868e-11	4.30735e-10
ENSG00000082153	BZW1	1.38669	3.12518e-11	4.32812e-10
ENSG00000198208	RPS6KL1	-1.84582	3.13376e-11	4.3379e-10
ENSG00000144867	SRPRB	-1.80884	3.16175e-11	4.37452e-10
ENSG00000188010	MORN2	-2.13029	3.18379e-11	4.40288e-10
ENSG00000160211	G6PD	-1.25677	3.22522e-11	4.45801e-10
ENSG00000100139	MICALL1	1.54012	3.23421e-11	4.46828e-10
ENSG00000010295	IFFO1	-1.06296	3.31452e-11	4.57702e-10
ENSG00000116032	GRIN3B	-1.6098	3.3289e-11	4.59466e-10
ENSG00000152495	CAMK4	2.89857	3.34098e-11	4.60711e-10
ENSG00000074266	EED	1.17648	3.34593e-11	4.61148e-10
ENSG00000129244	ATP1B2	-1.13375	3.35565e-11	4.62264e-10
ENSG00000085185	BCORL1	1.5559	3.36396e-11	4.63186e-10
ENSG00000121851	POLR3GL	-1.44757	3.42317e-11	4.70883e-10
ENSG00000115295	CLIP4	1.12283	3.43854e-11	4.7277e-10
ENSG00000197050	ZNF420	-1.31891	3.46777e-11	4.76331e-10
ENSG00000147548	WHSC1L1	1.46755	3.47687e-11	4.7735e-10
ENSG00000145780	FEM1C	1.41397	3.50723e-11	4.81288e-10
ENSG00000184634	MED12	1.41226	3.58273e-11	4.91412e-10
ENSG00000176273	SLC35G1	2.1526	3.608e-11	4.94641e-10
ENSG00000115339	GALNT3	2.5826	3.68615e-11	5.04869e-10
ENSG00000153046	CDYL	1.84022	3.69581e-11	5.05951e-10
ENSG00000175463	TBC1D10C	-2.65834	3.70444e-11	5.06889e-10
ENSG00000167771	RCOR2	-3.53049	3.71038e-11	5.07459e-10
ENSG00000084754	HADHA	-0.980801	3.71308e-11	5.07585e-10
ENSG00000165533	TTC8	-1.79883	3.72809e-11	5.09392e-10
ENSG00000088448	ANKRD10	0.946395	3.73736e-11	5.10415e-10
ENSG00000157326	DHRS4	-1.99756	3.84437e-11	5.24779e-10
ENSG00000132510	KDM6B	1.71862	3.89598e-11	5.3157e-10
ENSG00000100399	CHADL	-2.31488	3.9194e-11	5.34436e-10
ENSG00000198056	PRIM1	-1.45111	3.92073e-11	5.34436e-10
ENSG00000109927	TECTA	1.62883	3.93196e-11	5.35455e-10
ENSG00000189227	C15orf61	-2.26351	3.93133e-11	5.35455e-10
ENSG00000188428	BLOC1S5	-1.34824	3.93546e-11	5.35676e-10
ENSG00000148660	CAMK2G	-1.13078	4.00614e-11	5.44778e-10
ENSG00000100350	FOXRED2	-1.94947	4.05611e-11	5.51311e-10
ENSG00000163602	RYBP	1.80619	4.10236e-11	5.57067e-10
ENSG00000141179	PCTP	-1.48958	4.10444e-11	5.57084e-10
ENSG00000258890	CEP95	0.877859	4.13058e-11	5.60366e-10
ENSG00000143390	RFX5	1.13247	4.15457e-11	5.63086e-10
ENSG00000143578	CREB3L4	-1.41013	4.15378e-11	5.63086e-10
ENSG00000113407	TARS	1.03152	4.22911e-11	5.72692e-10
ENSG00000160209	PDXK	-2.00511	4.22946e-11	5.72692e-10
ENSG00000122068	FYTTD1	1.44368	4.24241e-11	5.74173e-10
ENSG00000066455	GOLGA5	0.858304	4.27994e-11	5.78704e-10
ENSG00000143797	MBOAT2	1.71177	4.31766e-11	5.83528e-10
ENSG00000128383	APOBEC3A	3.58253	4.32832e-11	5.84692e-10
ENSG00000136869	TLR4	-2.54908	4.3428e-11	5.8637e-10
ENSG00000010219	DYRK4	-1.34807	4.35328e-11	5.87507e-10
ENSG00000068903	SIRT2	-1.27428	4.41371e-11	5.95382e-10
ENSG00000151692	RNF144A	1.28013	4.55991e-11	6.14813e-10
ENSG00000165028	NIPSNAP3B	2.0424	4.62332e-11	6.23068e-10
ENSG00000159884	CCDC107	-1.47506	4.64222e-11	6.2532e-10
ENSG00000135052	GOLM1	-1.07822	4.65485e-11	6.26726e-10
ENSG00000163874	ZC3H12A	1.64248	4.66371e-11	6.27622e-10
ENSG00000162290	DCP1A	1.42616	4.70167e-11	6.32433e-10
ENSG00000150760	DOCK1	-1.47317	4.71065e-11	6.33343e-10
ENSG00000147576	ADHFE1	-1.26914	4.75903e-11	6.39546e-10
ENSG00000112210	RAB23	2.74447	4.76794e-11	6.40443e-10
ENSG00000105711	SCN1B	3.53921	4.77776e-11	6.41459e-10
ENSG00000111229	ARPC3	-1.4513	4.92386e-11	6.60144e-10
ENSG00000206418	RAB12	1.42303	4.93887e-11	6.61846e-10
ENSG00000150681	RGS18	-3.31316	4.99755e-11	6.69395e-10
ENSG00000002587	HS3ST1	-3.03773	5.00384e-11	6.69568e-10
ENSG00000137841	PLCB2	-3.18987	5.00587e-11	6.69568e-10
ENSG00000213281	NRAS	1.37169	5.00353e-11	6.69568e-10
ENSG00000108479	GALK1	-1.5096	5.0154e-11	6.70528e-10
ENSG00000111679	PTPN6	-2.32014	5.09559e-11	6.80612e-10
ENSG00000198911	SREBF2	1.1804	5.09456e-11	6.80612e-10
ENSG00000105364	MRPL4	-1.24205	5.14037e-11	6.85951e-10
ENSG00000117595	IRF6	2.56346	5.19348e-11	6.92714e-10
ENSG00000136383	ALPK3	3.99045	5.23299e-11	6.97659e-10
ENSG00000162222	TTC9C	-1.47719	5.30113e-11	7.06083e-10
ENSG00000091483	FH	-1.4853	5.32366e-11	7.08754e-10
ENSG00000096092	TMEM14A	-2.2911	5.40267e-11	7.18603e-10
ENSG00000165548	TMEM63C	-4.08367	5.47069e-11	7.27312e-10
ENSG00000164626	KCNK5	2.67319	5.53624e-11	7.35342e-10
ENSG00000116337	AMPD2	-2.0626	5.56491e-11	7.38806e-10
ENSG00000071246	VASH1	-2.29284	5.65867e-11	7.50904e-10
ENSG00000168938	PPIC	-2.84477	5.76381e-11	7.64146e-10
ENSG00000138435	CHRNA1	4.69761	5.7756e-11	7.65354e-10
ENSG00000109445	ZNF330	-1.15534	5.78258e-11	7.65923e-10
ENSG00000076554	TPD52	1.31145	5.79296e-11	7.66943e-10
ENSG00000182732	RGS6	5.26455	5.79907e-11	7.67396e-10
ENSG00000185088	RPS27L	1.59317	5.8699e-11	7.75691e-10
ENSG00000204859	ZBTB48	-1.63718	5.8679e-11	7.75691e-10
ENSG00000168140	VASN	2.3849	5.89113e-11	7.78136e-10
ENSG00000111540	RAB5B	2.25365	5.90904e-11	7.80141e-10
ENSG00000129538	RNASE1	-3.52265	5.91611e-11	7.80713e-10
ENSG00000100473	COCH	2.64557	5.93712e-11	7.83125e-10
ENSG00000180979	LRRC57	1.17671	5.97919e-11	7.87945e-10
ENSG00000196155	PLEKHG4	-1.70666	6.06978e-11	7.99514e-10
ENSG00000013523	ANGEL1	-1.84111	6.07789e-11	8.00214e-10
ENSG00000204991	SPIRE2	-1.23388	6.12127e-11	8.05553e-10
ENSG00000023330	ALAS1	1.32765	6.13325e-11	8.06759e-10
ENSG00000115286	NDUFS7	-1.44858	6.15658e-11	8.09082e-10
ENSG00000260001	TGFBR3L	-2.30347	6.15605e-11	8.09082e-10
ENSG00000005108	THSD7A	2.58797	6.18034e-11	8.10861e-10
ENSG00000100321	SYNGR1	-1.87004	6.17814e-11	8.10861e-10
ENSG00000170855	TRIAP1	-1.03338	6.18148e-11	8.10861e-10
ENSG00000189403	HMGB1	-1.27639	6.22183e-11	8.1578e-10
ENSG00000175315	CST6	-4.55101	6.23526e-11	8.17165e-10
ENSG00000182197	EXT1	-1.02902	6.44033e-11	8.43653e-10
ENSG00000112941	PAPD7	1.38865	6.45878e-11	8.45683e-10
ENSG00000166349	RAG1	1.87046	6.48121e-11	8.4823e-10
ENSG00000197763	TXNRD3	-3.11376	6.50147e-11	8.50493e-10
ENSG00000115841	RMDN2	-1.86135	6.57818e-11	8.60133e-10
ENSG00000092036	HAUS4	-1.11986	6.59535e-11	8.61984e-10
ENSG00000185507	IRF7	2.32175	6.68503e-11	8.73304e-10
ENSG00000170037	CNTROB	-1.34702	6.71665e-11	8.77034e-10
ENSG00000140511	HAPLN3	3.27668	6.83783e-11	8.92449e-10
ENSG00000033327	GAB2	1.19502	6.99183e-11	9.11716e-10
ENSG00000075223	SEMA3C	2.21517	7.03733e-11	9.1723e-10
ENSG00000140955	ADAD2	-3.64426	7.12076e-11	9.27681e-10
ENSG00000198915	RASGEF1A	1.73576	7.24355e-11	9.43247e-10
ENSG00000077044	DGKD	-1.17408	7.42043e-11	9.65839e-10
ENSG00000179820	MYADM	1.34015	7.48861e-11	9.74269e-10
ENSG00000118197	DDX59	1.06094	7.49342e-11	9.74451e-10
ENSG00000120910	PPP3CC	1.66634	7.49816e-11	9.74624e-10
ENSG00000187912	CLEC17A	4.5582	7.51967e-11	9.76975e-10
ENSG00000175711	B3GNTL1	-1.95368	7.62814e-11	9.90167e-10
ENSG00000198121	LPAR1	1.6748	7.81885e-11	1.01446e-09
ENSG00000173535	TNFRSF10C	-2.50606	7.83322e-11	1.01586e-09
ENSG00000167861	HID1	-2.86812	7.8435e-11	1.01674e-09
ENSG00000080345	RIF1	1.63282	8.03564e-11	1.0408e-09
ENSG00000170396	ZNF804A	-1.64519	8.03646e-11	1.0408e-09
ENSG00000100592	DAAM1	-1.02616	8.22353e-11	1.06407e-09
ENSG00000106628	POLD2	-1.6247	8.31982e-11	1.07604e-09
ENSG00000149428	HYOU1	1.18976	8.37111e-11	1.08155e-09
ENSG00000014641	MDH1	-1.01013	8.61371e-11	1.11103e-09
ENSG00000213366	GSTM2	-1.86449	8.8036e-11	1.1345e-09
ENSG00000198060	MARCH5	0.973084	8.95276e-11	1.1532e-09
ENSG00000169413	RNASE6	-3.57646	9.0115e-11	1.15972e-09
ENSG00000163554	SPTA1	1.64747	9.03449e-11	1.16215e-09
ENSG00000166965	RCCD1	-1.32505	9.04287e-11	1.16271e-09
ENSG00000082074	FYB	-2.18533	9.16947e-11	1.17792e-09
ENSG00000123570	RAB9B	2.38944	9.18506e-11	1.1794e-09
ENSG00000203782	LOR	3.14508	9.4767e-11	1.2163e-09
ENSG00000163377	FAM19A4	6.77773	9.61518e-11	1.23352e-09
ENSG00000108262	GIT1	-0.887803	9.73037e-11	1.24773e-09
ENSG00000163694	RBM47	1.19283	9.78576e-11	1.25371e-09
ENSG00000129055	ANAPC13	-1.34	9.80008e-11	1.25488e-09
ENSG00000181467	RAP2B	1.27403	9.83952e-11	1.2589e-09
ENSG00000151240	DIP2C	-2.73624	9.84397e-11	1.25891e-09
ENSG00000155304	HSPA13	1.6699	9.8728e-11	1.26203e-09
ENSG00000113161	HMGCR	1.18825	1.02619e-10	1.31118e-09
ENSG00000235568	NFAM1	-1.54747	1.03043e-10	1.31602e-09
ENSG00000101665	SMAD7	1.24094	1.03371e-10	1.31961e-09
ENSG00000104936	DMPK	-2.8006	1.03486e-10	1.32049e-09
ENSG00000137198	GMPR	1.54672	1.03639e-10	1.32185e-09
ENSG00000116984	MTR	1.24003	1.04959e-10	1.33809e-09
ENSG00000184076	UQCR10	-1.30253	1.05634e-10	1.34608e-09
ENSG00000106268	NUDT1	-1.64375	1.06294e-10	1.3533e-09
ENSG00000188747	NOXA1	-2.58506	1.06399e-10	1.35402e-09
ENSG00000173559	NABP1	2.7105	1.06568e-10	1.35557e-09
ENSG00000172602	RND1	1.64721	1.07613e-10	1.36825e-09
ENSG00000171817	ZNF540	-1.71012	1.07976e-10	1.37226e-09
ENSG00000141985	SH3GL1	-1.28199	1.09295e-10	1.38779e-09
ENSG00000168310	IRF2	1.52179	1.09934e-10	1.39528e-09
ENSG00000169057	MECP2	0.922234	1.10361e-10	1.40008e-09
ENSG00000107864	CPEB3	1.36617	1.12497e-10	1.42654e-09
ENSG00000114686	MRPL3	-1.22982	1.12796e-10	1.42971e-09
ENSG00000170122	FOXD4	3.82106	1.13443e-10	1.43726e-09
ENSG00000075420	FNDC3B	2.52289	1.13764e-10	1.4407e-09
ENSG00000120306	CYSTM1	1.72054	1.1522e-10	1.45784e-09
ENSG00000106066	CPVL	-4.48373	1.16549e-10	1.47335e-09
ENSG00000267534	S1PR2	-1.72487	1.16917e-10	1.47735e-09
ENSG00000186318	BACE1	-1.87302	1.17061e-10	1.47851e-09
ENSG00000171953	ATPAF2	-1.48423	1.17127e-10	1.47868e-09
ENSG00000122873	CISD1	-2.10972	1.17522e-10	1.48303e-09
ENSG00000011021	CLCN6	1.31257	1.18418e-10	1.49367e-09
ENSG00000116741	RGS2	1.28843	1.19567e-10	1.50749e-09
ENSG00000108688	CCL7	6.24123	1.20002e-10	1.51231e-09
ENSG00000104863	LIN7B	-1.91167	1.20704e-10	1.52049e-09
ENSG00000175513	TSGA10IP	-5.6208	1.22415e-10	1.54137e-09
ENSG00000007237	GAS7	-2.375	1.23404e-10	1.55244e-09
ENSG00000065243	PKN2	1.54906	1.23631e-10	1.55461e-09
ENSG00000121152	NCAPH	-3.23165	1.27332e-10	1.59975e-09
ENSG00000053371	AKR7A2	-1.15614	1.29244e-10	1.62226e-09
ENSG00000082512	TRAF5	1.91287	1.29295e-10	1.62226e-09
ENSG00000103184	SEC14L5	-2.27854	1.29732e-10	1.62704e-09
ENSG00000147202	DIAPH2	-2.06975	1.30213e-10	1.63236e-09
ENSG00000108424	KPNB1	1.14554	1.3089e-10	1.63868e-09
ENSG00000213977	TAX1BP3	-1.40478	1.32754e-10	1.66129e-09
ENSG00000099910	KLHL22	-1.86976	1.33374e-10	1.66831e-09
ENSG00000155966	AFF2	2.67768	1.3432e-10	1.67942e-09
ENSG00000165474	GJB2	4.86785	1.35095e-10	1.68836e-09
ENSG00000140025	EFCAB11	-1.15437	1.39521e-10	1.74209e-09
ENSG00000160161	CILP2	3.30971	1.39638e-10	1.74209e-09
ENSG00000265096	C1QTNF1-AS1	7.90248	1.39624e-10	1.74209e-09
ENSG00000162729	IGSF8	2.03386	1.40147e-10	1.74768e-09
ENSG00000130244	FAM98C	-1.19964	1.40555e-10	1.752e-09
ENSG00000117228	GBP1	4.2178	1.42225e-10	1.77204e-09
ENSG00000177875	C12orf68	5.34225	1.43688e-10	1.78871e-09
ENSG00000124802	EEF1E1	-1.20926	1.45211e-10	1.80688e-09
ENSG00000145020	AMT	-1.21339	1.45653e-10	1.81159e-09
ENSG00000171109	MFN1	0.958059	1.4647e-10	1.82096e-09
ENSG00000002549	LAP3	2.18222	1.48495e-10	1.84533e-09
ENSG00000116459	ATP5F1	-1.22141	1.48691e-10	1.8464e-09
ENSG00000160284	SPATC1L	-2.11864	1.48711e-10	1.8464e-09
ENSG00000164850	GPER1	-3.52357	1.5092e-10	1.87221e-09
ENSG00000067113	PPAP2A	-1.70992	1.51812e-10	1.88246e-09
ENSG00000133703	KRAS	1.48736	1.52597e-10	1.89137e-09
ENSG00000156299	TIAM1	1.5684	1.52792e-10	1.89297e-09
ENSG00000149260	CAPN5	-2.63574	1.54828e-10	1.91735e-09
ENSG00000036672	USP2	-2.29753	1.55503e-10	1.92471e-09
ENSG00000142875	PRKACB	-1.98667	1.55556e-10	1.92471e-09
ENSG00000146054	TRIM7	-1.42831	1.56298e-10	1.93221e-09
ENSG00000074966	TXK	1.99448	1.56795e-10	1.93751e-09
ENSG00000214753	HNRNPUL2	-0.866493	1.57813e-10	1.94924e-09
ENSG00000137338	PGBD1	-1.11841	1.59543e-10	1.96977e-09
ENSG00000169740	ZNF32	-1.5807	1.62804e-10	2.00916e-09
ENSG00000110218	PANX1	1.37501	1.63487e-10	2.01671e-09
ENSG00000187609	EXD3	-1.57449	1.64581e-10	2.02934e-09
ENSG00000164125	FAM198B	-3.44462	1.65044e-10	2.03417e-09
ENSG00000115350	POLE4	-2.56991	1.65247e-10	2.03491e-09
ENSG00000135972	MRPS9	-1.25268	1.65194e-10	2.03491e-09
ENSG00000198298	ZNF485	-2.47442	1.6626e-10	2.04651e-09
ENSG00000160683	CXCR5	5.70978	1.66703e-10	2.05107e-09
ENSG00000129219	PLD2	1.17031	1.66889e-10	2.05248e-09
ENSG00000004948	CALCR	-4.51527	1.67552e-10	2.05974e-09
ENSG00000079931	MOXD1	4.10057	1.68272e-10	2.06681e-09
ENSG00000167363	FN3K	-1.35292	1.68468e-10	2.06833e-09
[truncated: 16,819 more rows]
