# Supplementary material for: Bacterial infection remodels the DNA methylation landscape of human dendritic cells
Source: HighWire-hosted journal article supplement (doi:10.1101/gr.192005.115), 2015-09-21
Supplement: TableS7_Pyro-seq_data.xlsx [file TableS7_Pyro-seq_data.xlsx]

## Sheet: Hypo_IRF4
IRF4
Sample Name	Condition	Time (h)	CpG: 405130	CpG: 405246
DC555 NI2	NI	2	80.42	93.33
DC555 TB2	MTB	2	83.63	94.97
DC555 NI18	NI	18	76.79	94.33
DC555 TB18	MTB	18	60.12	89.66
DC555 NI48	NI	48	84.19	95.4
DC552 NI2	NI	2	81.62	93.73
DC552 TB2	MTB	2	82.39	95.2
DC552 NI18	NI	18	82.14	91.91
DC552 TB18	MTB	18	44.3	81.29
DC552 NI48	NI	48	79.79	96.13
DC552 TB48	MTB	48	12.71	46.02
DC558 NI2	NI	2	79.63	95.11
DC558 TB2	MTB	2	80.97	93.41
DC558 NI18	NI	18	68.64	93.95
DC558 TB18	MTB	18	56.76	86.62
DC558 NI48	NI	48	81.66	94.54
DC558 TB48	MTB	48	25.44	64.57
DC4 2h NI	NI	2	78.54	90.41
DC4 2h TB	MTB	2	78.31	91.9
DC4 18h NI	NI	18	76.67	91.68
DC4 18h TB	MTB	18	15.17	55.54
DC4 48h NI	NI	48	77.73	90.21
DC4 48h TB	MTB	48	3.69	23.06
DC5 2h NI	NI	2	76.27	94.41
DC5 2h TB	MTB	2	82.32	92.13
DC5 18h NI	NI	18	76.63	91.65
DC5 18h TB	MTB	18	30.64	67.55
DC5 48h NI	NI	48	80.64	91.83
DC5 48h TB	MTB	48	7.58	37.04
DC552 NI72	NI	72	79.82	N/A
DC552 TB72	MTB	72	6.87	N/A
DC555 TB72	MTB	72	12.98	N/A
DC558 NI72	NI	72	81.88	N/A
DC558 TB72	MTB	72	21.9	N/A

## Sheet: Hypo_TRAFD1
TRAFD1
Sample Name	Condition	Time (h)	CpG: 112587381	CpG: 112587570
DC555 NI2	NI	2	90.38	N/A
DC555 TB2	MTB	2	86	80.44
DC555 NI18	NI	18	92.79	82.69
DC555 TB18	MTB	18	53.3	42.75
DC555 NI48	NI	48	94.73	86.61
DC552 NI2	NI	2	90.56	84.96
DC552 TB2	MTB	2	95	85.6
DC552 NI18	NI	18	94.16	85.08
DC552 TB18	MTB	18	42.5	35.29
DC552 NI48	NI	48	92.26	78.62
DC552 TB48	MTB	48	15.04	6.14
DC558 NI2	NI	2	95.09	85.64
DC558 TB2	MTB	2	94.52	85.86
DC558 NI18	NI	18	94.41	85.81
DC558 TB18	MTB	18	55.46	N/A
DC558 NI48	NI	48	95.33	92.71
DC558 TB48	MTB	48	34.15	82.11
DC4 2h NI	NI	2	91.05	86.65
DC4 2h TB	MTB	2	100	86.87
DC4 18h NI	NI	18	92	86.97
DC4 18h TB	MTB	18	25.83	23.53
DC4 48h NI	NI	48	90.69	85.12
DC4 48h TB	MTB	48	11.63	7.24
DC5 2h NI	NI	2	91.92	84.28
DC5 2h TB	MTB	2	96.6	90.66
DC5 18h NI	NI	18	97.31	86.64
DC5 18h TB	MTB	18	30.97	19.95
DC5 48h NI	NI	48	94.13	88.56
DC5 48h TB	MTB	48	16.11	8.67
DC552 NI72	NI	72	90.59	83.05
DC552 TB72	MTB	72	13.21	3.98
DC555 TB72	MTB	72	16.14	4.74
DC558 NI72	NI	72	93.79	88.1
DC558 TB72	MTB	72	33.04	13.13

## Sheet: Hypo_BCL2
BCL2
Sample Name	Condition	Time (h)	CpG: 60924924	CpG: 60925050
DC555 NI2	NI	2	86.58	82.73
DC555 TB2	MTB	2	85.45	79.69
DC555 NI18	NI	18	85.93	83.2
DC555 TB18	MTB	18	47.54	56.31
DC555 NI48	NI	48	89.52	85.61
DC552 NI2	NI	2	93.37	88.48
DC552 TB2	MTB	2	94.02	89.03
DC552 NI18	NI	18	93.84	88.33
DC552 TB18	MTB	18	44.05	52.45
DC552 NI48	NI	48	93.46	89.48
DC552 TB48	MTB	48	12.88	24.89
DC558 NI2	NI	2	90.4	83.06
DC558 TB2	MTB	2	91.21	92.46
DC558 NI18	NI	18	92.21	85.85
DC558 TB18	MTB	18	44.11	50.62
DC558 NI48	NI	48	92.49	99.29
DC558 TB48	MTB	48	4.3	59.68
DC4 2h NI	NI	2	92.8	87.43
DC4 2h TB	MTB	2	93.81	87.51
DC4 18h NI	NI	18	92.57	88.07
DC4 18h TB	MTB	18	27.82	35.57
DC4 48h NI	NI	48	92.62	88.43
DC4 48h TB	MTB	48	7.95	11.89
DC5 2h NI	NI	2	93.34	87.26
DC5 2h TB	MTB	2	93.4	87.51
DC5 18h NI	NI	18	91.93	90.89
DC5 18h TB	MTB	18	30.76	38.73
DC5 48h NI	NI	48	92.15	87.98
DC5 48h TB	MTB	48	7.44	13.81
DC552 NI72	NI	72	93	89.21
DC552 TB72	MTB	72	4.73	12.65
DC555 TB72	MTB	72	4.73	11.24
DC558 NI72	NI	72	93.08	86.64
DC558 TB72	MTB	72	12.31	19.36

## Sheet: Hypo_REL
REL
Sample Name	Condition	Time (h)	CpG: 61083779
DC555 NI2	NI	2	78.61
DC555 TB2	MTB	2	80.04
DC555 NI18	NI	18	79.92
DC555 TB18	MTB	18	65.81
DC555 NI48	NI	48	82.46
DC552 NI2	NI	2	85.3
DC552 TB2	MTB	2	84.96
DC552 NI18	NI	18	90.25
DC552 TB18	MTB	18	55.97
DC552 NI48	NI	48	90.12
DC552 TB48	MTB	48	32.36
DC558 NI2	NI	2	82.66
DC558 TB2	MTB	2	84.97
DC558 NI18	NI	18	80.24
DC558 TB18	MTB	18	63.99
DC558 NI48	NI	48	84.23
DC558 TB48	MTB	48	49.68
DC4 2h NI	NI	2	89.69
DC4 2h TB	MTB	2	89.66
DC4 18h NI	NI	18	86.08
DC4 18h TB	MTB	18	56.37
DC4 48h NI	NI	48	84.03
DC4 48h TB	MTB	48	39.16
DC5 2h NI	NI	2	87.6
DC5 2h TB	MTB	2	81.27
DC5 18h NI	NI	18	85.37
DC5 18h TB	MTB	18	54.88
DC5 48h NI	NI	48	82.18
DC5 48h TB	MTB	48	35.31
DC552 NI72	NI	72	86.91
DC552 TB72	MTB	72	26.55
DC555 TB72	MTB	72	27.49
DC558 NI72	NI	72	80.95
DC558 TB72	MTB	72	40.75

## Sheet: Hypo_CD83
CD83
Sample Name	Condition	Time (h)	CpG: 14072394
DC555 NI2	NI	2	73.95
DC555 TB2	MTB	2	85.77
DC555 NI18	NI	18	89.26
DC555 TB18	MTB	18	67.69
DC555 NI48	NI	48	85.63
DC552 NI2	NI	2	88.48
DC552 TB2	MTB	2	88.56
DC552 NI18	NI	18	89.16
DC552 TB18	MTB	18	56.58
DC552 NI48	NI	48	89.86
DC552 TB48	MTB	48	35.36
DC558 NI2	NI	2	87.43
DC558 TB2	MTB	2	89.1
DC558 NI18	NI	18	88.57
DC558 TB18	MTB	18	65.68
DC558 NI48	NI	48	81.2
DC558 TB48	MTB	48	39.95
DC4 2h NI	NI	2	91.08
DC4 2h TB	MTB	2	90.11
DC4 18h NI	NI	18	89.29
DC4 18h TB	MTB	18	26.19
DC4 48h NI	NI	48	87.55
DC4 48h TB	MTB	48	12.04
DC5 2h NI	NI	2	89.4
DC5 2h TB	MTB	2	83.82
DC5 18h NI	NI	18	88.2
DC5 18h TB	MTB	18	43.4
DC5 48h NI	NI	48	87.34
DC5 48h TB	MTB	48	17.9
DC552 NI72	NI	72	85.99
DC552 TB72	MTB	72	18.69
DC555 TB72	MTB	72	27.7
DC558 NI72	NI	72	87.63
DC558 TB72	MTB	72	30.85

## Sheet: Hypo_NFKB1
NFKB1
Sample Name	Condition	Time (h)	CpG: 103520328	CpG: 103520345
DC555 NI2	NI	2	55.68	52.11
DC555 TB2	MTB	2	63.9	50.21
DC555 NI18	NI	18	65.03	49.79
DC555 TB18	MTB	18	16.3	13.74
DC555 NI48	NI	48	67.87	52.81
DC552 NI2	NI	2	76.66	79.48
DC552 TB2	MTB	2	N/A	N/A
DC552 NI18	NI	18	86.9	85.92
DC552 TB18	MTB	18	21.3	11.92
DC552 NI48	NI	48	88.67	78.39
DC552 TB48	MTB	48	6.17	3.15
DC558 NI2	NI	2	74.79	78.3
DC558 TB2	MTB	2	75.67	74.78
DC558 NI18	NI	18	79.39	76.14
DC558 TB18	MTB	18	21.13	18.33
DC558 NI48	NI	48	80.24	78.04
DC558 TB48	MTB	48	8.26	5.81
DC4 2h NI	NI	2	84.72	73.99
DC4 2h TB	MTB	2	85.31	69.72
DC4 18h NI	NI	18	72.04	72.21
DC4 18h TB	MTB	18	18.02	11.68
DC4 48h NI	NI	48	75.24	64.17
DC4 48h TB	MTB	48	6.23	6.58
DC5 2h NI	NI	2	80.25	74.48
DC5 2h TB	MTB	2	79.47	72.74
DC5 18h NI	NI	18	83.67	71.17
DC5 18h TB	MTB	18	16.22	9.74
DC5 48h NI	NI	48	74.22	67.1
DC5 48h TB	MTB	48	5.63	4.88
DC552 NI72	NI	72	84	76.7
DC552 TB72	MTB	72	4.47	3.02
DC555 TB72	MTB	72	40.52	35.25
DC558 NI72	NI	72	74.05	66.1
DC558 TB72	MTB	72	5.84	3.35

## Sheet: Hyper_SH3GL1
SH3GL1
Sample Name	Condition	Time (h)	CpG: 4386251	CpG: 4386268	CpG: 4386271	CpG: 4386277
DC555 NI2	NI	2	71.35	76.22	73.73	74.19
DC555 TB2	MTB	2	71.71	76.09	68.33	72.63
DC555 NI18	NI	18	71.68	77.48	69.69	72.43
DC555 TB18	MTB	18	71.22	75.79	68.91	72.05
DC555 NI48	NI	48	70.2	74.63	67.48	72.47
DC552 NI2	NI	2	68.4	72.19	62.27	69.72
DC552 TB2	MTB	2	63.89	69.34	65.93	66.22
DC552 NI18	NI	18	67.35	70.95	67.54	68.27
DC552 TB18	MTB	18	65.23	71.9	66.43	66.47
DC552 NI48	NI	48	65.86	72.47	65.6	68.24
DC552 TB48	MTB	48	67.99	73.53	66.06	70.81
DC558 NI2	NI	2	65.94	69.73	66.06	67.51
DC558 TB2	MTB	2	63.02	68.61	62.43	65.02
DC558 NI18	NI	18	62.77	68.48	66.7	64.81
DC558 TB18	MTB	18	65.83	70.65	63.33	68.06
DC558 NI48	NI	48	65.99	71.15	64.02	68.4
DC558 TB48	MTB	48	62.82	67.88	66.46	66.55
DC4 2h NI	NI	2	69.42	74.21	68.99	72.78
DC4 2h TB	MTB	2	66.04	72.62	68.06	68.01
DC4 18h NI	NI	18	67.33	73.38	68.94	69.54
DC4 18h TB	MTB	18	69.92	73.92	66.87	72.96
DC4 48h NI	NI	48	70.07	75.42	67.61	71.78
DC4 48h TB	MTB	48	67.64	73.26	71.29	70.28
DC5 2h NI	NI	2	71.91	75.07	70.95	69.66
DC5 2h TB	MTB	2	70.09	76.29	69.54	72.41
DC5 18h NI	NI	18	70.44	76.73	68.42	69.19
DC5 18h TB	MTB	18	70.85	75.31	67.58	72.01
DC5 48h NI	NI	48	71.07	76.43	69.32	73.22
DC5 48h TB	MTB	48	69.94	75.17	69.4	71.33

## Sheet: Hyper_CASP3
CASP3
Sample Name	Condition	Time (h)	CpG: 185534689	CpG: 185534708
DC555 NI2	NI	2	N/A	N/A
DC555 TB2	MTB	2	32.13	34.68
DC555 NI18	NI	18	33.25	33.42
DC555 TB18	MTB	18	28.74	32.33
DC555 NI48	NI	48	37.7	35.38
DC552 NI2	NI	2	56.22	61.92
DC552 TB2	MTB	2	57.76	59.13
DC552 NI18	NI	18	54.74	58.44
DC552 TB18	MTB	18	N/A	N/A
DC552 NI48	NI	48	61.28	65.63
DC552 TB48	MTB	48	63.42	62.32
DC558 NI2	NI	2	28.89	29.61
DC558 TB2	MTB	2	29.03	30.57
DC558 NI18	NI	18	26.65	28.63
DC558 TB18	MTB	18	26.4	28.53
DC558 NI48	NI	48	33.31	34.05
DC558 TB48	MTB	48	29.27	28.94
DC4 2h NI	NI	2	3.24	2.48
DC4 2h TB	MTB	2	4.83	2.39
DC4 18h NI	NI	18	3.07	2.32
DC4 18h TB	MTB	18	4.7	1.78
DC4 48h NI	NI	48	4.32	2.58
DC4 48h TB	MTB	48	6.06	2.63
DC5 2h NI	NI	2	69.16	67.51
DC5 2h TB	MTB	2	63.53	65.6
DC5 18h NI	NI	18	63.14	70.1
DC5 18h TB	MTB	18	64.02	65.85
DC5 48h NI	NI	48	61.58	64.1
DC5 48h TB	MTB	48	63.26	65.57

## Sheet: Hyper_PACS2
PACS2
Sample Name	Condition	Time (h)	CpG: 105792519	CpG: 105792523
DC555 NI2	NI	2	32.53	23.91
DC555 TB2	MTB	2	32.81	24.98
DC555 NI18	NI	18	31.17	28.47
DC555 TB18	MTB	18	35.8	28.1
DC555 NI48	NI	48	33.66	23.66
DC552 NI2	NI	2	34.71	28.54
DC552 TB2	MTB	2	36.08	24.4
DC552 NI18	NI	18	29.29	24.79
DC552 TB18	MTB	18	31.63	27.85
DC552 NI48	NI	48	34.65	30.8
DC552 TB48	MTB	48	30.85	25.8
DC558 NI2	NI	2	35.71	28.57
DC558 TB2	MTB	2	32.97	25.88
DC558 NI18	NI	18	34.74	26.21
DC558 TB18	MTB	18	33.7	27.38
DC558 NI48	NI	48	35.9	27.22
DC558 TB48	MTB	48	30.67	26.73
DC4 2h NI	NI	2	24.52	19.18
DC4 2h TB	MTB	2	21.49	15.53
DC4 18h NI	NI	18	23.5	20.78
DC4 18h TB	MTB	18	21.74	15.41
DC4 48h NI	NI	48	26.65	22.71
DC4 48h TB	MTB	48	34.11	26.6
DC5 2h NI	NI	2	26.38	24.26
DC5 2h TB	MTB	2	25.51	22.21
DC5 18h NI	NI	18	29.6	22.51
DC5 18h TB	MTB	18	32.28	22.91
DC5 48h NI	NI	48	32.97	23.12
DC5 48h TB	MTB	48	27.08	23.97

## Sheet: Hyper_TAB2
TAB2
Sample Name	Condition	Time (h)	CpG: 149679116	CpG: 149679128	CpG: 149679132
DC555 NI2	NI	2	22.85	20	11.15
DC555 TB2	MTB	2	21.16	17.43	9.28
DC555 NI18	NI	18	18.6	15.28	8.61
DC555 TB18	MTB	18	19.87	17.39	7.91
DC555 NI48	NI	48	17.03	13.4	7.96
DC552 NI2	NI	2	13.82	10.69	4.55
DC552 TB2	MTB	2	13.32	9.82	3.85
DC552 NI18	NI	18	13.8	10.86	4.33
DC552 TB18	MTB	18	14.63	10.22	3.8
DC552 NI48	NI	48	12.46	10.4	4.84
DC552 TB48	MTB	48	12.78	7.32	4.51
DC558 NI2	NI	2	17.98	13.77	6.8
DC558 TB2	MTB	2	13.83	9.58	4.95
DC558 NI18	NI	18	14.09	12.32	5.75
DC558 TB18	MTB	18	13.82	10.68	4.94
DC558 NI48	NI	48	12.03	10.73	4.75
DC558 TB48	MTB	48	14.64	11.36	5.37
DC4 2h NI	NI	2	15.01	11.52	6.25
DC4 2h TB	MTB	2	17.85	15.09	7.59
DC4 18h NI	NI	18	17.71	13.68	7.35
DC4 18h TB	MTB	18	16.78	13.55	6.87
DC4 48h NI	NI	48	18.56	13.75	6.57
DC4 48h TB	MTB	48	20.38	16.19	8.34
DC5 2h NI	NI	2	14.06	6.64	4.65
DC5 2h TB	MTB	2	12.94	10.3	3.91
DC5 18h NI	NI	18	14.86	11.74	6.39
DC5 18h TB	MTB	18	14.19	10.9	6.13
DC5 48h NI	NI	48	11.2	9.09	4.21
DC5 48h TB	MTB	48	15.53	11.21	6.09
