# Supplementary material for: Bacterial infection remodels the DNA methylation landscape of human dendritic cells
Source: HighWire-hosted journal article supplement (doi:10.1101/gr.192005.115), 2015-09-21
Supplement: TableS8_qPCR_data.xlsx [file TableS8_qPCR_data.xlsx]

## Sheet: IRF4
IRF4
Sample Name	Condition	Time (hours)	Cт	2-ddCt
DC4 NI2	NI	2	24.9124	0.35404
DC4 TB2	MTB	2	24.936	0.489556
DC4 NI18	NI	18	25.241	0.238746
DC4 TB18	MTB	18	22.9667	1.18542
DC4 NI48	NI	48	26.1301	0.17315
DC4 TB48	MTB	48	24.8762	0.317968
DC4 NI72	NI	72	N/A	N/A
DC4 TB72	MTB	72	N/A	N/A
DC5 NI2	NI	2	24.5273	0.335884
DC5 TB2	MTB	2	24.0687	0.424224
DC5 NI18	NI	18	24.4432	0.206907
DC5 TB18	MTB	18	23.3686	0.696157
DC5 NI48	NI	48	27.1866	0.0750243
DC5 TB48	MTB	48	25.4359	0.280234
DC5 NI72	NI	72	N/A	N/A
DC5 TB72	MTB	72	N/A	N/A
DC552 NI2	NI	2	26.9773	0.217439
DC552 TB2	MTB	2	24.7262	0.41046
DC552 NI18	NI	18	25.6622	0.176971
DC552 TB18	MTB	18	23.9511	0.629606
DC552 NI48	NI	48	26.0788	0.185472
DC552 TB48	MTB	48	23.652	0.829002
DC552 NI72	NI	72	26.1604	0.206943
DC552 TB72	MTB	72	24.5089	0.756985
DC555 NI2	NI	2	24.5171	0.245503
DC555 TB2	MTB	2	25.1096	0.271006
DC555 NI18	NI	18	25.7044	0.154713
DC555 TB18	MTB	18	24.1698	0.523557
DC555 NI48	NI	48	25.9361	0.20858
DC555 TB48	MTB	48	24.208	0.679467
DC555 NI72	NI	72	26.4916	0.171822
DC555 TB72	MTB	72	25.4561	0.694703
DC558 NI2	NI	2	N/A	N/A
DC558 TB2	MTB	2	N/A	N/A
DC558 NI18	NI	18	25.4517	0.179107
DC558 TB18	MTB	18	24.7313	0.370425
DC558 NI48	NI	48	26.9414	0.151689
DC558 TB48	MTB	48	24.3563	0.606312
DC558 NI72	NI	72	26.7785	0.110912
DC558 TB72	MTB	72	24.9904	0.557344

## Sheet: TRAFD1
TRAFD1
Sample Name	Condition	Time (hours)	Cт	2-ddCt
DC4 NI2	NI	2	26.7017	0.102428
DC4 TB2	MTB	2	28.5891	0.0389147
DC4 NI18	NI	18	26.4383	0.104111
DC4 TB18	MTB	18	23.9757	0.588995
DC4 NI48	NI	48	27.4192	0.0708514
DC4 TB48	MTB	48	24.6818	0.363815
DC4 NI72	NI	72	N/A	N/A
DC4 TB72	MTB	72	N/A	N/A
DC5 NI2	NI	2	26.8784	0.0658314
DC5 TB2	MTB	2	28.1341	0.0253388
DC5 NI18	NI	18	26.6332	0.0453434
DC5 TB18	MTB	18	23.953	0.46428
DC5 NI48	NI	48	27.8624	0.0469665
DC5 TB48	MTB	48	24.6095	0.496922
DC5 NI72	NI	72	N/A	N/A
DC5 TB72	MTB	72	N/A	N/A
DC552 NI2	NI	2	28.9498	0.0554044
DC552 TB2	MTB	2	28.5741	0.0285066
DC552 NI18	NI	18	27.5298	0.0484961
DC552 TB18	MTB	18	24.6361	0.391624
DC552 NI48	NI	48	27.5928	0.0649379
DC552 TB48	MTB	48	23.7175	0.792199
DC552 NI72	NI	72	27.6436	0.0740216
DC552 TB72	MTB	72	23.6284	1.39359
DC555 NI2	NI	2	26.9156	0.0465649
DC555 TB2	MTB	2	27.9113	0.0388663
DC555 NI18	NI	18	27.2771	0.0520098
DC555 TB18	MTB	18	24.2487	0.49569
DC555 NI48	NI	48	27.1939	0.0872244
DC555 TB48	MTB	48	24.3473	0.616888
DC555 NI72	NI	72	27.8121	0.0687949
DC555 TB72	MTB	72	24.4548	1.39067
DC558 NI2	NI	2	N/A	N/A
DC558 TB2	MTB	2	N/A	N/A
DC558 NI18	NI	18	26.8962	0.0658059
DC558 TB18	MTB	18	25.0622	0.294503
DC558 NI48	NI	48	27.7906	0.0842014
DC558 TB48	MTB	48	24.8578	0.428294
DC558 NI72	NI	72	27.5783	0.0637121
DC558 TB72	MTB	72	25.0304	0.542103

## Sheet: BCL2
BCL2
Sample Name	Condition	Time (hours)	Cт	2-ddCt
DC4 NI2	NI	2	31.2645	0.00433396
DC4 TB2	MTB	2	30.6856	0.00909909
DC4 NI18	NI	18	31.7042	0.00270592
DC4 TB18	MTB	18	27.5621	0.0490347
DC4 NI48	NI	48	31.3866	0.00452951
DC4 TB48	MTB	48	27.2584	0.0609909
DC4 NI72	NI	72	N/A	N/A
DC4 TB72	MTB	72	N/A	N/A
DC5 NI2	NI	2	31.0187	0.00373315
DC5 TB2	MTB	2	30.8262	0.0039207
DC5 NI18	NI	18	31.4501	0.00160875
DC5 TB18	MTB	18	27.1646	0.0501189
DC5 NI48	NI	48	32.1467	0.00241041
DC5 TB48	MTB	48	26.9821	0.0959535
DC5 NI72	NI	72	N/A	N/A
DC5 TB72	MTB	72	N/A	N/A
DC552 NI2	NI	2	33.2049	0.00290166
DC552 TB2	MTB	2	31.967	0.0027137
DC552 NI18	NI	18	33.2622	0.000912191
DC552 TB18	MTB	18	27.4644	0.0551391
DC552 NI48	NI	48	32.9844	0.00154695
DC552 TB48	MTB	48	27.1003	0.0759457
DC552 NI72	NI	72	33.834	0.00101359
DC552 TB72	MTB	72	27.9688	0.0687943
DC555 NI2	NI	2	30.3781	0.00422417
DC555 TB2	MTB	2	30.959	0.00470041
DC555 NI18	NI	18	31.6476	0.00251437
DC555 TB18	MTB	18	27.9035	0.0393554
DC555 NI48	NI	48	32.9536	0.00160994
DC555 TB48	MTB	48	27.8263	0.0553285
DC555 NI72	NI	72	33.9781	0.000958097
DC555 TB72	MTB	72	28.7918	0.0688104
DC558 NI2	NI	2	N/A	N/A
DC558 TB2	MTB	2	N/A	N/A
DC558 NI18	NI	18	32.1035	0.00178129
DC558 TB18	MTB	18	28.712	0.0234635
DC558 NI48	NI	48	33.4774	0.00163465
DC558 TB48	MTB	48	27.8724	0.0529958
DC558 NI72	NI	72	33.0575	0.00142834
DC558 TB72	MTB	72	29.5025	0.0244256

## Sheet: REL
REL
Sample Name	Condition	Time (hours)	Cт	2-ddCt
DC4 NI2	NI	2	25.8255	0.188008
DC4 TB2	MTB	2	21.8866	4.05282
DC4 NI18	NI	18	26.4752	0.101482
DC4 TB18	MTB	18	22.6988	1.42728
DC4 NI48	NI	48	26.8866	0.102491
DC4 TB48	MTB	48	23.4261	0.868759
DC4 NI72	NI	72	N/A	N/A
DC4 TB72	MTB	72	N/A	N/A
DC5 NI2	NI	2	26.2562	0.10133
DC5 TB2	MTB	2	22.9292	0.934529
DC5 NI18	NI	18	26.3212	0.0562912
DC5 TB18	MTB	18	22.3358	1.42432
DC5 NI48	NI	48	26.0961	0.159773
DC5 TB48	MTB	48	22.9613	1.55761
DC5 NI72	NI	72	N/A	N/A
DC5 TB72	MTB	72	N/A	N/A
DC552 NI2	NI	2	28.6559	0.0679268
DC552 TB2	MTB	2	22.7254	1.64279
DC552 NI18	NI	18	27.1636	0.0625094
DC552 TB18	MTB	18	22.9906	1.22519
DC552 NI48	NI	48	27.1186	0.0902127
DC552 TB48	MTB	48	22.9247	1.37238
DC552 NI72	NI	72	28.0075	0.0575198
DC552 TB72	MTB	72	24.0201	1.06223
DC555 NI2	NI	2	25.0957	0.164393
DC555 TB2	MTB	2	23.9263	0.615439
DC555 NI18	NI	18	25.7362	0.151341
DC555 TB18	MTB	18	22.908	1.25543
DC555 NI48	NI	48	26.4643	0.144633
DC555 TB48	MTB	48	23.0996	1.46488
DC555 NI72	NI	72	27.4949	0.0857162
DC555 TB72	MTB	72	24.8114	1.08609
DC558 NI2	NI	2	N/A	N/A
DC558 TB2	MTB	2	N/A	N/A
DC558 NI18	NI	18	26.2602	0.102266
DC558 TB18	MTB	18	23.7641	0.724192
DC558 NI48	NI	48	27.5477	0.0996454
DC558 TB48	MTB	48	23.2215	1.33139
DC558 NI72	NI	72	27.0584	0.0913569
DC558 TB72	MTB	72	24.7508	0.658052

## Sheet: CD83
CD83
Sample Name	Condition	Time (hours)	Cт	2-ddCt
DC4 NI2	NI	2	25.5204	0.232282
DC4 TB2	MTB	2	22.6404	2.40355
DC4 NI18	NI	18	26.0911	0.132438
DC4 TB18	MTB	18	22.0478	2.24117
DC4 NI48	NI	48	26.821	0.107256
DC4 TB48	MTB	48	23.2756	0.964286
DC4 NI72	NI	72	N/A	N/A
DC4 TB72	MTB	72	N/A	N/A
DC5 NI2	NI	2	25.4532	0.176794
DC5 TB2	MTB	2	22.7622	1.04924
DC5 NI18	NI	18	25.0201	0.138713
DC5 TB18	MTB	18	21.25	3.02327
DC5 NI48	NI	48	26.3863	0.130657
DC5 TB48	MTB	48	22.776	1.77109
DC5 NI72	NI	72	N/A	N/A
DC5 TB72	MTB	72	N/A	N/A
DC552 NI2	NI	2	27.3833	0.164107
DC552 TB2	MTB	2	22.9523	1.40368
DC552 NI18	NI	18	27.37	0.054176
DC552 TB18	MTB	18	22.5212	1.69634
DC552 NI48	NI	48	27.8316	0.0550321
DC552 TB48	MTB	48	22.9049	1.39137
DC552 NI72	NI	72	26.7702	0.135604
DC552 TB72	MTB	72	22.0075	4.28617
DC555 NI2	NI	2	26.0898	0.0825329
DC555 TB2	MTB	2	23.8859	0.632935
DC555 NI18	NI	18	26.6367	0.0810721
DC555 TB18	MTB	18	22.9636	1.20794
DC555 NI48	NI	48	27.3801	0.0766623
DC555 TB48	MTB	48	23.319	1.25828
DC555 NI72	NI	72	26.5174	0.168781
DC555 TB72	MTB	72	23.908	2.03154
DC558 NI2	NI	2	N/A	N/A
DC558 TB2	MTB	2	N/A	N/A
DC558 NI18	NI	18	26.6076	0.0803837
DC558 TB18	MTB	18	23.5969	0.813203
DC558 NI48	NI	48	27.6024	0.0959376
DC558 TB48	MTB	48	23.8148	0.882493
DC558 NI72	NI	72	25.5165	0.266003
DC558 TB72	MTB	72	23.9077	1.18045

## Sheet: NFKB1
NFKB1
Sample Name	Condition	Time (hours)	Cт	2-ddCt
DC4 NI2	NI	2	26.6039	0.109613
DC4 TB2	MTB	2	24.1271	0.857637
DC4 NI18	NI	18	27.6833	0.0439271
DC4 TB18	MTB	18	23.587	0.771161
DC4 NI48	NI	48	28.4319	0.0351158
DC4 TB48	MTB	48	24.708	0.357272
DC4 NI72	NI	72	N/A	N/A
DC4 TB72	MTB	72	N/A	N/A
DC5 NI2	NI	2	27.3118	0.0487514
DC5 TB2	MTB	2	24.4662	0.322043
DC5 NI18	NI	18	26.8791	0.0382379
DC5 TB18	MTB	18	22.7748	1.05061
DC5 NI48	NI	48	27.8221	0.0482965
DC5 TB48	MTB	48	24.1376	0.689226
DC5 NI72	NI	72	N/A	N/A
DC5 TB72	MTB	72	N/A	N/A
DC552 NI2	NI	2	29.2758	0.044201
DC552 TB2	MTB	2	25.9538	0.175273
DC552 NI18	NI	18	28.7701	0.0205271
DC552 TB18	MTB	18	24.9156	0.322644
DC552 NI48	NI	48	29.1717	0.021738
DC552 TB48	MTB	48	24.9005	0.348902
DC552 NI72	NI	72	28.4415	0.0425784
DC552 TB72	MTB	72	23.9671	1.10201
DC555 NI2	NI	2	28.1736	0.01947
DC555 TB2	MTB	2	26.8268	0.0824215
DC555 NI18	NI	18	28.2545	0.0264158
DC555 TB18	MTB	18	25.1339	0.268366
DC555 NI48	NI	48	28.7282	0.0301139
DC555 TB48	MTB	48	25.3068	0.317232
DC555 NI72	NI	72	28.3971	0.0458631
DC555 TB72	MTB	72	25.4293	0.707756
DC558 NI2	NI	2	N/A	N/A
DC558 TB2	MTB	2	N/A	N/A
DC558 NI18	NI	18	28.8499	0.0169881
DC558 TB18	MTB	18	25.5827	0.205306
DC558 NI48	NI	48	29.7022	0.0223806
DC558 TB48	MTB	48	25.6809	0.242086
DC558 NI72	NI	72	28.8522	0.0263476
DC558 TB72	MTB	72	25.4874	0.394923
